# Supplementary material for: Asymmetric β,γ′-regioselective [4 + 3] and [4 + 2] annulations of α-vinylenals via cascade iminium ion-dienamine catalysis
Source: Royal Society of Chemistry journal article supplement (doi:10.1039/d0ob02068k), 2020-10-22

# Asymmetric $\beta,\gamma'$ -Regioselective [4+3] and [4+2] Annulations of $\alpha$ -Vinylenals via Cascade Iminium Ion–Dienamine Catalysis

Yang Gao,<sup>a</sup> Xue Song,<sup>a</sup> Ru-Jie Yan,<sup>a</sup> Wei Du,<sup>a</sup> and Ying-Chun Chen<sup>\*a,b</sup>

<sup>a</sup>Key Laboratory of Drug-Targeting and Drug Delivery System of the Ministry of Education and Sichuan Research Center for Drug Precision Industrial Technology, West China School of Pharmacy, Sichuan University, Chengdu 610041, China.

<sup>b</sup>College of Pharmacy, Third Military Medical University, Shapingba, Chongqing 400038, China.

E-mail: ycchen@scu.edu.cn

## Supplementary Information

### Table of Contents

|                                                                                                                                       |     |
|---------------------------------------------------------------------------------------------------------------------------------------|-----|
| 1. General methods .....                                                                                                              | S2  |
| 2. Typical procedure for the preparation of $\alpha$ -vinylenal 1a.....                                                               | S2  |
| 3. More screening conditions for asymmetric [4+3] and [4+2] annulations of $\alpha$ -vinylenals .....                                 | S4  |
| 3.1 $\beta,\gamma'$ -Regioselective [4+3] annulations of $\alpha$ -vinylenal 1a with <i>N</i> -(2,2,2-trifluoroethyl) ketimines 2 ... | S4  |
| 3.2 $\beta,\gamma'$ -Regioselective [4+2] annulation of $\alpha$ -vinylenal 1a with 2-(thiochroman-4-ylidene)malononitrile 4a .....   | S5  |
| 4. General procedure for asymmetric [4+3] and [4+2] annulations of $\alpha$ -vinylenals.....                                          | S6  |
| 4.1 $\beta,\gamma'$ -Regioselective [4+3] annulations of $\alpha$ -vinylenals 1 with <i>N</i> -(2,2,2-trifluoroethyl) ketimines 2.... | S6  |
| 4.2 $\beta,\gamma'$ -Regioselective [4+2] annulations of $\alpha$ -vinylenals 1 with $\alpha,\alpha$ -dicyanoalkenes 4 .....          | S16 |
| 5. Transformation of product 3a .....                                                                                                 | S22 |
| 6. More screening studies on other 1,3-dipoles, $\alpha$ -vinylenals and $\alpha,\alpha$ -dicyanoalkenes .....                        | S23 |
| 7. Asymmetric reaction on a 1.0 mmol scale .....                                                                                      | S24 |
| 7.1 $\beta,\gamma'$ -Regioselective [4+3] annulation of $\alpha$ -vinylenal 1a with <i>N</i> -(2,2,2-trifluoroethyl) ketimine 2a ..   | S24 |
| 7.2 $\beta,\gamma'$ -Regioselective [4+2] annulation of $\alpha$ -vinylenal 1a with 2-(thiochroman-4-ylidene)malononitrile 4a .....   | S24 |
| 8. Crystal data and structural refinement .....                                                                                       | S24 |
| 9. Proposed catalytic cycle via cascade iminium ion-dienamine catalysis .....                                                         | S28 |
| 10. NMR, HRMS spectra and HPLC chromatograms.....                                                                                     | S29 |

## 1. General methods

Unless otherwise noted, all reactions were carried out under ambient atmosphere; when the reactions required heating, the heat source was oil bath.  $^1\text{H}$  NMR (400 MHz),  $^{13}\text{C}$  NMR (100 MHz) and  $^{19}\text{F}$  NMR (376 MHz) spectra were recorded on Varian INOVA-400/54, Agilent DD2-600/54 or Bruker Ascend<sup>TM</sup> 400 instruments (Chemical shifts were reported in ppm from tetramethylsilane with the solvent resonance as the internal standard in  $\text{CDCl}_3$  solution, unless otherwise noted). The following abbreviations were used to explain the multiplicities: s = singlet, d = doublet, t = triplet, dd = double doublet, ddd = double double doublet, dt = double triplet; td = triple doublet; tt = triple triplet, m = multiplet, br = broad, and coupling constants ( $J$ ) are reported in Hertz (Hz). High resolution mass spectra (HRMS) were recorded on a Waters SYNAPT G2, Agilent G1969-85000 or Shimadzu LCMS-IT-TOF using a time-of-flight mass spectrometer equipped with electrospray ionization (ESI) source. X-ray diffraction experiments were carried out on an Agilent Gemini or Xcalibur E and the data obtained were deposited at the Cambridge Crystallographic Data Centre. In each case, diastereomeric ratio was determined by  $^1\text{H}$  NMR analysis and enantiomeric excess was determined by HPLC (Agilent Technologies: 1220 Infinity II, 1200 Series, 1260 Infinity) analysis on a chiral column in comparison with authentic racemate, using a Daicel Chiralpak AD-H Column (250  $\times$  4.6 mm), Chiralpak IE (250  $\times$  4.6 mm) or Chiralpak IA Column (250  $\times$  4.6 mm). UV detection was monitored at 254 nm. The specific optical rotation was obtained from Rudolph Research Analytical Autopol I automatic polarimeter in  $\text{CHCl}_3$  solution at 25  $^\circ\text{C}$ . The melting point was obtained from WRX-4 Mel-Temp apparatus. Column chromatography was performed on silica gel (200–300 mesh) eluting with ethyl acetate (EtOAc) and petroleum ether. TLC was performed on glass-backed silica plates. UV light,  $\text{I}_2$ , and solution of potassium permanganate were used to visualize products or starting materials. All chemicals were used without purification as commercially available unless otherwise noted. Petroleum ether (60–90  $^\circ\text{C}$ ) was redistilled. The secondary amine catalyst **C4**,<sup>1</sup> *N*-(2,2,2-trifluoroethyl) ketimines **2**,<sup>2</sup> (2*E*,3*E*)-2-benzylidene-4-phenylbut-3-enal **1i**,<sup>3</sup> and  $\alpha,\alpha$ -dicyanoalkenes **4**<sup>4</sup> were prepared according to the literature procedures.

## 2. Typical procedure for the preparation of $\alpha$ -vinylenal **1a**

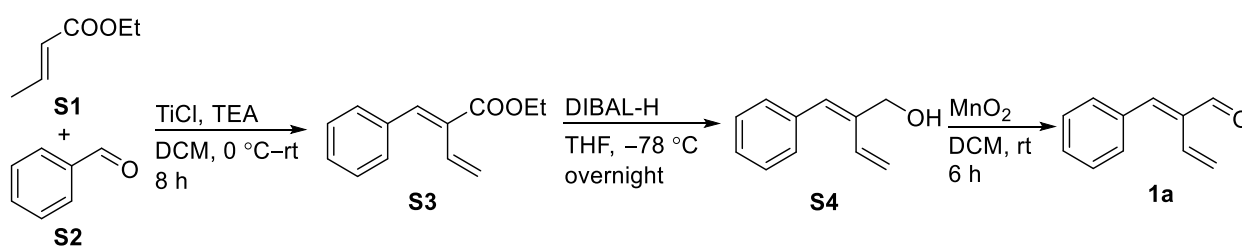

(*E*)-Ethyl 2-benzylidenebut-3-enoate **S3** was synthesized according to literature procedure.<sup>5</sup>

To a mixture of **S1** (1.14 g, 10.0 mmol, 1.0 equiv) and **S2** (1.06 g, 10.0 mmol, 1.0 equiv) in DCM

(80.0 mL) was added TEA (3.03 g, 30 mmol, 3.0 equiv). This mixture was kept in ice bath for 5 min before the slow dropwise addition of  $\text{TiCl}_4$  (3.76 g, 20 mmol, 2.0 equiv). The mixture was stirred for further 8 h at room temperature. After completion monitored by TLC, the mixture was quenched with water (50 mL) and extracted with DCM (3  $\times$  30 mL). The combined organic phases were washed with brine (50 mL) and water (50 mL), dried over  $\text{Na}_2\text{SO}_4$ , filtered and evaporated under reduced pressure. The crude product was purified by flash chromatography on silica gel (EtOAc/petroleum ether = 1/15) to afford **S3** as a yellow oil; 1.41 g, 70% yield.

To a solution of **S3** (1.41 g, 7.00 mmol, 1.0 equiv) in dry THF (15 mL) under a nitrogen atmosphere was added DIBAL-H (14.0 mL, 1.0 M solution in hexane, 14.0 mmol, 2.0 equiv) dropwise over a period of 30 min at  $-78^\circ\text{C}$ . The mixture was then stirred overnight. After completion monitored by TLC, the reaction mixture is carefully quenched with 2 M HCl solution (10.0 mL), followed by extraction with EtOAc (3  $\times$  30 mL). The organic layers were combined, dried over  $\text{Na}_2\text{SO}_4$ , filtered and evaporated under reduced pressure. The crude product was purified by flash chromatography on silica gel (EtOAc/petroleum ether = 1/10) to afford **S4** as a yellow oil; 0.672 g, 60% yield.

To a solution of **S4** (0.672 g, 4.20 mmol, 1.0 equiv) in DCM (10.0 mL) was added  $\text{MnO}_2$  (1.82 g, 21.0 mmol, 5.0 equiv) in one portion and the mixture was stirred for 6 h at room temperature. After completion monitored by TLC, the mixture was filtered through a pad of celite and the filtrate was concentrated in vacuo. The residue was purified by flash chromatography on silica gel (EtOAc/petroleum ether = 1/15) to afford **1a** as a yellow oil; 531 mg, 80% yield.

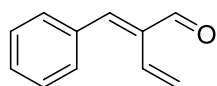

**(E)-2-Benzylidenebut-3-enal (1a)**: as a yellow oil; 531 mg, 80% yield for the last step (EtOAc/petroleum ether = 1/15);  $^1\text{H}$  NMR (400 MHz,  $\text{CDCl}_3$ ):  $\delta$  (ppm) 9.67 (s, 1H), 7.51 (d,  $J = 6.9$  Hz, 2H), 7.44–7.34 (m, 4H), 7.18 (s, 1H), 6.57 (dd,  $J = 17.6, 11.6$  Hz, 1H), 6.15 (dd,  $J = 17.9, 1.8$  Hz, 1H), 5.56 (d,  $J = 12.2$  Hz, 1H);  $^{13}\text{C}$  NMR (100 MHz,  $\text{CDCl}_3$ ):  $\delta$  (ppm) 193.8, 149.7, 136.5, 134.6, 130.3 (2C), 129.9, 128.6 (2C), 127.7, 122.5; HRMS (ESI-TOF)  $m/z$ :  $[\text{M} + \text{H}]^+$  Calcd for  $\text{C}_{11}\text{H}_{11}\text{O}$  159.0804; Found 159.0807.

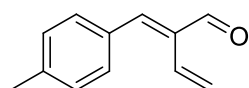

**(E)-2-(4-Methylbenzylidene)but-3-enal (1d)**: as a yellow oil; 420 mg, 70% yield for the last step (EtOAc/petroleum ether = 1/15);  $^1\text{H}$  NMR (400 MHz,  $\text{CDCl}_3$ )  $\delta$  (ppm) 9.66 (s, 1H), 7.44 (d,  $J = 7.7$  Hz, 2H), 7.24 (d,  $J = 7.8$  Hz, 2H), 7.17 (s, 1H), 6.58 (dd,  $J = 17.8, 11.8$  Hz, 1H), 6.12 (d,  $J = 17.6$  Hz, 1H), 5.57 (d,  $J = 11.7$  Hz, 1H), 2.39 (s, 3H);  $^{13}\text{C}$  NMR (100 MHz,  $\text{CDCl}_3$ )  $\delta$  (ppm) 193.9, 150.0, 140.5, 135.9, 131.9, 130.5 (2C), 129.4 (2C), 127.9, 122.2, 21.5; HRMS (ESI-TOF)  $m/z$ :  $[\text{M} + \text{Ha}]^+$  Calcd for  $\text{C}_{12}\text{H}_{12}\text{ONa}$  195.0786; Found 195.0786.

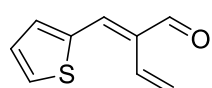

**(E)-2-(Thiophen-2-ylmethylene)but-3-enal (1h)**: as a yellow oil; 340 mg, 72% yield for the last step (EtOAc/petroleum ether = 1/15);  $^1\text{H}$  NMR (400 MHz,  $\text{CDCl}_3$ )

$\delta$  (ppm) 9.62 (s, 1H), 7.60 (d,  $J = 5.1$  Hz, 1H), 7.41 (d,  $J = 3.7$  Hz, 1H), 7.30 (s, 1H), 7.15 (t,  $J = 4.3$  Hz, 1H), 6.74 (dd,  $J = 17.6, 11.6$  Hz, 1H), 6.15 (d,  $J = 17.0$  Hz, 1H), 5.66 (d,  $J = 11.7$  Hz, 1H);  $^{13}\text{C}$  NMR (100 MHz,  $\text{CDCl}_3$ )  $\delta$  (ppm) 193.2, 141.5, 138.4, 134.3, 133.8, 132.4, 128.2, 127.7, 123.5; HRMS (ESI-TOF)  $m/z$ :  $[\text{M} + \text{H}]^+$  Calcd for  $\text{C}_9\text{H}_9\text{OS}$  165.0374; Found 165.0370.

### 3. More screening conditions for asymmetric [4+3] and [4+2] annulations of $\alpha$ -vinylenals

#### 3.1 $\beta,\gamma'$ -Regioselective [4+3] annulations of $\alpha$ -vinylenal **1a** with *N*-(2,2,2-trifluoroethyl) ketimines **2**<sup>a</sup>

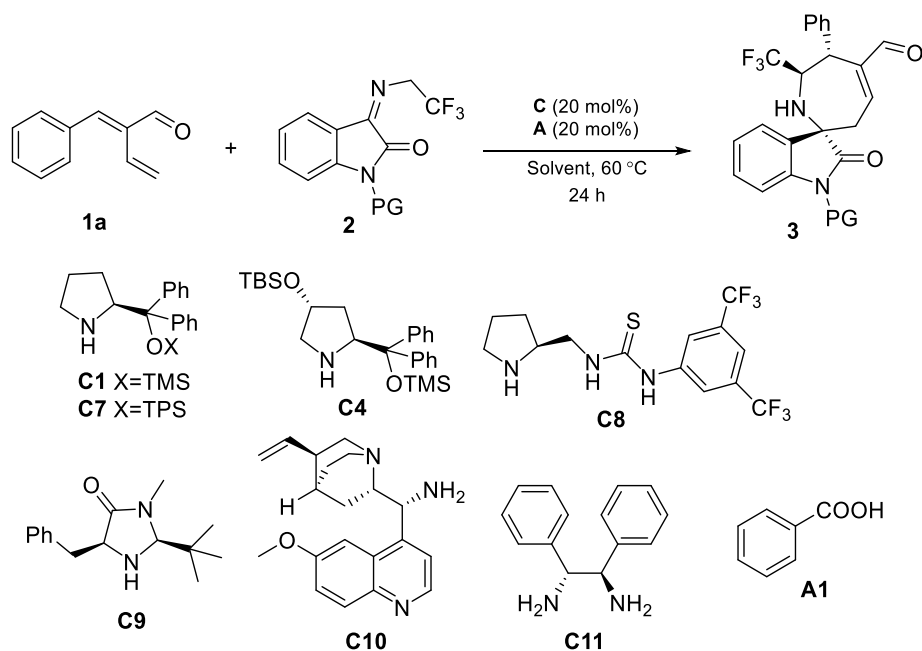

| Entry | PG  | C          | A         | Yield (%) <sup>b</sup> | ee (%) <sup>c</sup> |
|-------|-----|------------|-----------|------------------------|---------------------|
| 1     | Boc | <b>C1</b>  | <b>A1</b> | Trace                  | /                   |
| 2     | H   | <b>C1</b>  | <b>A1</b> | Messy                  | /                   |
| 3     | Me  | <b>C7</b>  | <b>A1</b> | 40                     | 82                  |
| 4     | Me  | <b>C8</b>  | <b>A1</b> | 45                     | 67                  |
| 5     | Me  | <b>C9</b>  | <b>A1</b> | NR                     | /                   |
| 6     | Me  | <b>C10</b> | <b>A1</b> | NR                     | /                   |
| 7     | Me  | <b>C11</b> | <b>A1</b> | NR                     | /                   |
| 8     | Me  | <b>C4</b>  | AcOH      | 50                     | 80                  |
| 9     | Me  | <b>C4</b>  | TFA       | NR                     | /                   |

<sup>a</sup> Unless noted otherwise, reactions were performed with enal **1a** (0.12 mmol, 1.2 equiv), isatin imine **2** (0.1 mmol, 1.0 equiv), amine **C** (0.02 mmol, 20 mol%) and acid **A** (0.02 mmol, 20 mol%) in solvent (0.2 mL) at 60 °C for 24 h. <sup>b</sup> Yield of the isolated product. <sup>c</sup> Determined by HPLC analysis on a chiral stationary phase; dr >19:1 by  $^1\text{H}$  NMR analysis.

### 3.2 $\beta,\gamma'$ -Regioselective [4+2] annulation of $\alpha$ -vinylenal **1a** with $\alpha,\alpha$ -dicyanoalkene **4a**<sup>a</sup>

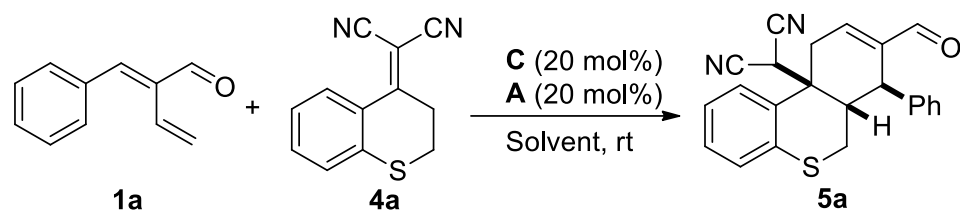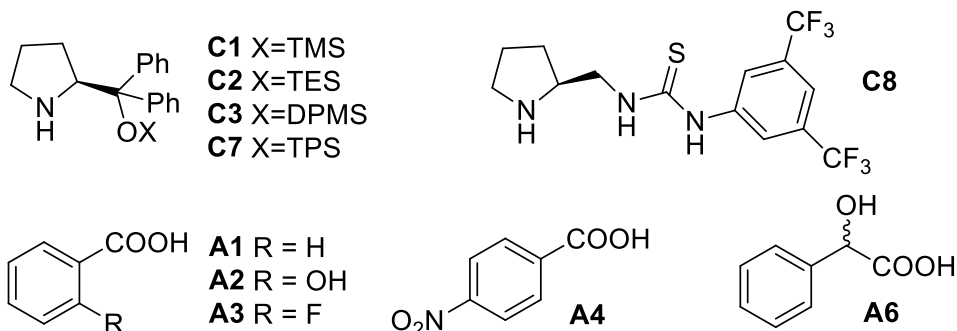

| Entry    | <b>C</b>  | <b>A</b>  | Solvent            | Yield (%) <sup>b</sup> | ee (%) <sup>c</sup> |
|----------|-----------|-----------|--------------------|------------------------|---------------------|
| 1        | <b>C1</b> | <b>A1</b> | THF                | 69                     | 97                  |
| 2        | <b>C2</b> | <b>A1</b> | THF                | 87                     | 97                  |
| 3        | <b>C3</b> | <b>A1</b> | THF                | 70                     | 98                  |
| 4        | <b>C7</b> | <b>A1</b> | THF                | 54                     | 96                  |
| 5        | <b>C8</b> | <b>A1</b> | THF                | 90                     | 67                  |
| 6        | <b>C2</b> | <b>A2</b> | THF                | 60                     | 92                  |
| 7        | <b>C2</b> | <b>A3</b> | THF                | 65                     | 96                  |
| <b>8</b> | <b>C2</b> | <b>A4</b> | <b>THF</b>         | <b>92</b>              | <b>98</b>           |
| 9        | <b>C2</b> | <b>A6</b> | THF                | 86                     | 95                  |
| 10       | <b>C2</b> | <b>A4</b> | Toluene            | 55                     | 93                  |
| 11       | <b>C2</b> | <b>A4</b> | CHCl <sub>3</sub>  | 50                     | 93                  |
| 12       | <b>C2</b> | <b>A4</b> | DCM                | 62                     | 99                  |
| 13       | <b>C2</b> | <b>A4</b> | CH <sub>3</sub> CN | 87                     | 92                  |

<sup>a</sup>Unless noted otherwise, reactions were performed with enal **1a** (0.12 mmol, 1.2 equiv),  $\alpha,\alpha$ -dicyanoalkene **4a** (0.1 mmol, 1.0 equiv), amine **C** (0.02 mmol, 20 mol%) and acid **A** (0.02 mmol, 20 mol%) in solvent (0.2 mL) at rt for 12 h. <sup>b</sup>Yield of the isolated product. <sup>c</sup>Determined by HPLC analysis on a chiral stationary phase; dr >19:1 by <sup>1</sup>H NMR analysis.

## 4. General procedure for asymmetric [4+3] and [4+2] annulations of $\alpha$ -vinylenals

### 4.1 $\beta,\gamma'$ -Regioselective [4+3] annulations of $\alpha$ -vinylenals **1** with *N*-(2,2,2-trifluoroethyl) ketimines **2**

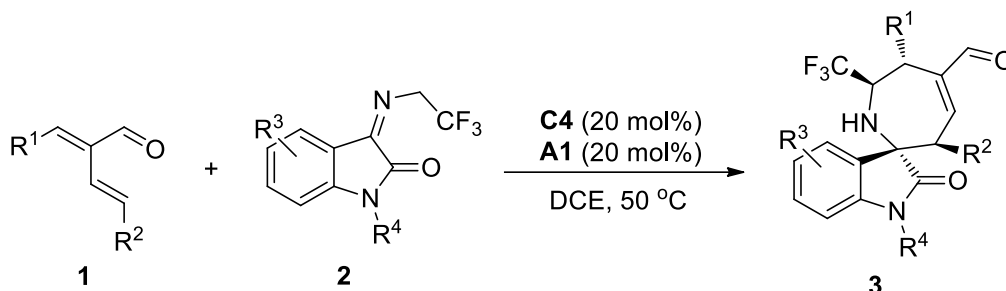

A mixture of  $\alpha$ -vinylenal **1** (0.120 mmol, 1.2 equiv), *N*-(2,2,2-trifluoroethyl) ketimine **2** (0.100 mmol, 1.0 equiv), **C4** (9.1 mg, 0.020 mmol, 0.2 equiv) and **A1** (2.4 mg, 0.020 mmol, 0.2 equiv) in DCE (0.2 mL) was stirred at 50 °C for 12–24 h, and the reaction was monitored by TLC. After completion, the product **3** was obtained by flash chromatography on silica gel (EtOAc/petroleum ether). The racemic **3** could not be obtained by using the achiral amine catalysts, so the mixture of chiral catalyst **C1** and its enantiomer *ent*-**C1** was used for the preparation of the racemate.

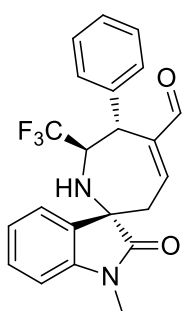

**Synthesis of 3a:** A mixture of (*E*)-2-benzylidenebut-3-enal **1a** (19.0 mg, 0.120 mmol, 1.2 equiv), (*Z*)-1-methyl-3-((2,2,2-trifluoroethyl)imino)indolin-2-one **2a** (24.2 mg, 0.100 mmol, 1.0 equiv), **C4** (9.1 mg, 0.020 mmol, 0.2 equiv) and **A1** (2.4 mg, 0.020 mmol, 0.2 equiv) in DCE (0.2 mL) was stirred at 50 °C for 24 h. After completion, purification by flash chromatography on silica gel (EtOAc/petroleum ether = 1/7) gave product **3a**: 30.0 mg (0.075 mmol), as a white solid, 75% yield; mp = 230–

231 °C;  $[\alpha]_D^{25} = +332.5$  ( $c = 1.5$  in CHCl<sub>3</sub>); >19:1 dr; 92% ee, determined by HPLC analysis [Chiralpak IE, *n*-hexane/*i*-PrOH = 90/10, 1.0 mL min<sup>-1</sup>,  $\lambda = 254$  nm,  $t$  (major) = 16.22 min,  $t$  (minor) = 19.15 min]; <sup>1</sup>H NMR (400 MHz, CDCl<sub>3</sub>)  $\delta$  (ppm) 9.48 (s, 1H), 7.45–7.30 (m, 2H), 7.39–7.34 (m, 1H), 7.33–7.28 (m, 2H), 7.27–7.21 (m, 1H), 7.18–7.12 (m, 1H), 7.10–7.02 (m, 1H), 6.92 (dd,  $J = 8.9, 6.2$  Hz, 1H), 6.89 (d,  $J = 7.8$  Hz, 1H), 4.86–4.78 (m, 1H), 4.45 (d,  $J = 10.8$  Hz, 1H), 3.78 (dd,  $J = 14.8, 6.4$  Hz, 1H), 3.24 (s, 3H), 2.47 (dd,  $J = 14.7, 8.9$  Hz, 1H), 2.07 (d,  $J = 10.3$  Hz, 1H); <sup>13</sup>C NMR (100 MHz, CDCl<sub>3</sub>)  $\delta$  (ppm) 192.7, 177.1, 147.2, 144.6, 142.9, 139.6, 130.8, 130.0, 128.6 (2C), 128.4 (2C), 127.5, 125.9 (q, <sup>1</sup> $J_{C-F} = 279.1$  Hz), 123.0, 122.3, 108.9, 61.86, 55.7 (q, <sup>2</sup> $J_{C-F} = 27.5$  Hz), 46.2, 32.8, 26.3; <sup>19</sup>F NMR (376 MHz, CDCl<sub>3</sub>):  $\delta$  (ppm) –74.0; HRMS (ESI-TOF)  $m/z$ : [M + H]<sup>+</sup> Calcd for C<sub>22</sub>H<sub>19</sub>F<sub>3</sub>N<sub>2</sub>O<sub>2</sub>Na 423.1296; Found 423.1292.

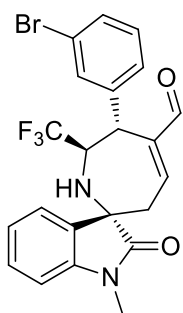

**Synthesis of 3b:** A mixture of (*E*)-2-(3-bromobenzylidene)but-3-enal **1b** (28.5 mg, 0.120 mmol, 1.2 equiv), (*Z*)-1-methyl-3-((2,2,2-trifluoroethyl)imino)indolin-2-one **2a** (24.2 mg, 0.100 mmol, 1.0 equiv), **C4** (9.1 mg, 0.020 mmol, 0.2 equiv) and **A1** (2.4 mg, 0.020 mmol, 0.2 equiv) in DCE (0.2 mL) was stirred at 50 °C for 18 h. After completion, purification by flash chromatography on silica gel (EtOAc/petroleum ether = 1/7) gave product **3b**: 31.0 mg (0.0650 mmol), as a white solid, 65% yield; mp 134–135 °C;  $[\alpha]_D^{25} = +310.4$  ( $c = 1.5$  in  $\text{CHCl}_3$ ); >19:1 dr; 87% ee, determined

by HPLC analysis [Chiralpak AD-H, *n*-hexane/*i*-PrOH = 80/20, 1.0 mL min<sup>-1</sup>,  $\lambda = 254$  nm, t (major) = 6.70 min, t (minor) = 8.14 min]; <sup>1</sup>H NMR (400 MHz, CDCl<sub>3</sub>)  $\delta$  (ppm) 9.47 (s, 1H), 7.51 (s, 1H), 7.40–7.30 (m, 3H), 7.20–7.12 (m, 2H), 7.06 (t,  $J = 7.5$  Hz, 1H), 6.97 (dd,  $J = 8.9, 6.2$  Hz, 1H), 6.89 (d,  $J = 7.8$  Hz, 1H), 4.85–4.70 (m, 1H), 4.40 (d,  $J = 10.8$  Hz, 1H), 3.72 (dd,  $J = 14.7, 6.2$  Hz, 1H), 3.24 (s, 3H), 2.48 (dd,  $J = 14.7, 8.9$  Hz, 1H), 2.07 (d,  $J = 10.0$  Hz, 1H); <sup>13</sup>C NMR (100 MHz, CDCl<sub>3</sub>)  $\delta$  (ppm) 192.5, 177.1, 146.5, 145.2, 142.9, 141.7, 131.3, 130.7, 130.6, 130.1, 130.1, 127.4, 125.8 (q, <sup>1</sup> $J_{\text{C-F}} = 279.8$  Hz), 123.1, 122.5, 122.4, 109.0, 61.8, 55.7 (q, <sup>2</sup> $J_{\text{C-F}} = 27.5$  Hz), 45.9, 32.9, 26.3; <sup>19</sup>F NMR (376 MHz, CDCl<sub>3</sub>):  $\delta$  (ppm) -73.8; HRMS (ESI-TOF)  $m/z$ : [M + H]<sup>+</sup> Calcd for C<sub>22</sub>H<sub>19</sub><sup>79</sup>BrF<sub>3</sub>N<sub>2</sub>O<sub>2</sub> 479.0582; Found 479.0583; Calcd for C<sub>22</sub>H<sub>19</sub><sup>81</sup>BrF<sub>3</sub>N<sub>2</sub>O<sub>2</sub> 481.0562; Found 481.0568.

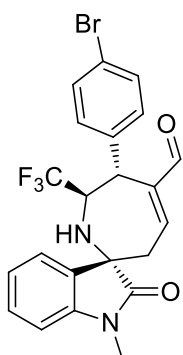

**Synthesis of 3c:** A mixture of (*E*)-2-(4-bromobenzylidene)but-3-enal **1c** (28.5 mg, 0.120 mmol, 1.2 equiv), (*Z*)-1-methyl-3-((2,2,2-trifluoroethyl)imino)indolin-2-one **2a** (24.2 mg, 0.100 mmol, 1.0 equiv), **C4** (9.1 mg, 0.020 mmol, 0.2 equiv) and **A1** (2.4 mg, 0.020 mmol, 0.2 equiv) in DCE (0.2 mL) was stirred at 50 °C for 17 h. After completion, purification by flash chromatography on silica gel (EtOAc/petroleum ether = 1/7) gave product **3c**: 28.7 mg (0.0600 mmol), as a white solid, 60% yield; mp 233–134 °C;  $[\alpha]_D^{25} = +378.7$  ( $c = 1.5$  in  $\text{CHCl}_3$ ); >19:1 dr; 88% ee, determined

by HPLC analysis [Chiralpak AD-H, *n*-hexane/*i*-PrOH = 80/20, 1.0 mL min<sup>-1</sup>,  $\lambda = 254$  nm, t (major) = 5.59 min, t (minor) = 6.34 min]; <sup>1</sup>H NMR (400 MHz, DMSO)  $\delta$  (ppm) 8.76 (s, 1H), 6.85 (d,  $J = 8.4$  Hz, 2H), 6.77–6.65 (m, 2H), 6.66 (d,  $J = 8.4$  Hz, 2H), 6.46 (dd,  $J = 8.9, 6.2$  Hz, 1H), 6.41 (t,  $J = 7.5$  Hz, 2H), 3.93–3.78 (m, 1H), 3.65 (d,  $J = 11.1$  Hz, 1H), 3.20 (d,  $J = 10.2$  Hz, 1H), 2.91 (dd,  $J = 14.7, 6.2$  Hz, 1H), 1.84 (s, 3H), 1.77 (dd,  $J = 14.7, 9.0$  Hz, 1H); <sup>13</sup>C NMR (100 MHz, DMSO)  $\delta$  (ppm) 194.3, 177.3, 146.6, 146.4, 142.9, 140.5, 131.8 (2C), 131.0 (2C), 129.8, 126.8 (q, <sup>1</sup> $J_{\text{C-F}} = 279.7$  Hz), 124.4, 122.6, 120.5, 109.2, 79.65, 62.4, 56.1 (q, <sup>2</sup> $J_{\text{C-F}} = 27.7$  Hz), 45.4, 32.8, 26.4; <sup>19</sup>F NMR (376 MHz, DMSO):  $\delta$  (ppm) -66.8; HRMS (ESI-TOF)  $m/z$ : [M + Ha]<sup>+</sup> Calcd for C<sub>22</sub>H<sub>18</sub><sup>79</sup>BrF<sub>3</sub>N<sub>2</sub>O<sub>2</sub>Na 501.0401; Found 501.0399; Calcd for C<sub>22</sub>H<sub>18</sub><sup>81</sup>BrF<sub>3</sub>N<sub>2</sub>O<sub>2</sub>Na 503.0381; Found 503.0381.

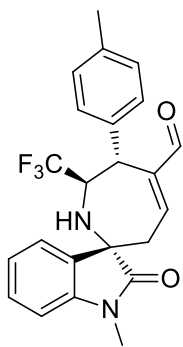

**Synthesis of 3d:** A mixture of (*E*)-2-(4-methylbenzylidene)but-3-enal **1d** (53.3 mg, 0.120 mmol, 1.2 equiv), (*Z*)-1-methyl-3-((2,2,2-trifluoroethyl)imino)indolin-2-one **2a** (24.2 mg, 0.100 mmol, 1.0 equiv), **C4** (9.1 mg, 0.020 mmol, 0.2 equiv) and **A1** (2.4 mg, 0.020 mmol, 0.2 equiv) in DCE (0.2 mL) was stirred at 50 °C for 12 h. After completion, purification by flash chromatography on silica gel (EtOAc/petroleum ether = 1/7) gave product **3d**: 33.1 mg (0.0800 mmol), as a white solid, 80% yield; mp 297–298 °C;  $[\alpha]_D^{25} = +312.2$  ( $c = 1.6$  in  $\text{CHCl}_3$ ); >19:1 dr; 91% ee, determined by HPLC analysis [Chiralpak AD-H, *n*-hexane/*i*-PrOH = 80/20, 1.0 mL min<sup>-1</sup>,  $\lambda = 254$  nm,  $t$  (major) = 5.22 min,  $t$  (minor) = 6.94 min]; <sup>1</sup>H NMR (400 MHz,  $\text{CDCl}_3$ )  $\delta$  (ppm) 9.48 (s, 1H), 7.36 (t,  $J = 7.7$  Hz, 1H), 7.33–7.28 (m, 2H), 7.15 (d,  $J = 7.3$  Hz, 1H), 7.13–7.09 (m, 2H), 7.06 (t,  $J = 7.5$  Hz, 1H), 6.90 (t,  $J = 9.0$  Hz, 2H), 4.85–4.73 (m, 1H), 4.42 (d,  $J = 10.8$  Hz, 1H), 3.77 (dd,  $J = 14.6, 6.3$  Hz, 1H), 3.24 (s, 3H), 2.46 (dd,  $J = 14.6, 8.8$  Hz, 1H), 2.31 (s, 3H), 2.07 (d,  $J = 10.3$  Hz, 1H); <sup>13</sup>C NMR (101 MHz,  $\text{CDCl}_3$ )  $\delta$  (ppm) 192.8, 177.2, 147.3, 144.4, 142.9, 137.2, 136.6, 130.8, 130.0 (2C), 129.3 (2C), 128.3, 126.0 (q, <sup>1</sup> $J_{\text{C-F}} = 279.8$  Hz), 123.0, 122.3, 108.9, 61.8, 55.6 (q, <sup>2</sup> $J_{\text{C-F}} = 27.1$  Hz), 45.7, 32.8, 26.3, 21.1; <sup>19</sup>F NMR (376 MHz,  $\text{CDCl}_3$ ):  $\delta$  (ppm) -74.0; HRMS (ESI-TOF)  $m/z$ :  $[\text{M} + \text{Na}]^+$  Calcd for  $\text{C}_{23}\text{H}_{21}\text{F}_3\text{N}_2\text{O}_2\text{Na}$  437.1453; Found 437.1443.

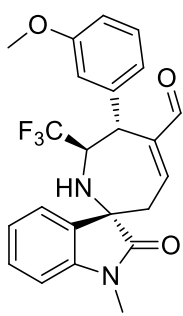

**Synthesis of 3e:** A mixture of (*E*)-2-(3-methoxybenzylidene)but-3-enal **1e** (22.6 mg, 0.120 mmol, 1.2 equiv), (*Z*)-1-methyl-3-((2,2,2-trifluoroethyl)imino)indolin-2-one **2a** (24.2 mg, 0.100 mmol, 1.0 equiv), **C4** (9.1 mg, 0.020 mmol, 0.2 equiv) and **A1** (2.4 mg, 0.020 mmol, 0.2 equiv) in DCE (0.2 mL) was stirred at 50 °C for 13 h. After completion, purification by flash chromatography on silica gel (EtOAc/petroleum ether = 1/7) gave product **3e**: 34.4 mg (0.0800 mmol), as a white solid, 80% yield; mp 297–298 °C;  $[\alpha]_D^{25} = +299.6$  ( $c = 1.7$  in  $\text{CHCl}_3$ ); >19:1 dr; 92% ee, determined by HPLC analysis [Chiralpak AD-H, *n*-hexane/*i*-PrOH = 80/20, 1.0 mL min<sup>-1</sup>,  $\lambda = 254$  nm,  $t$  (major) = 5.83 min,  $t$  (minor) = 6.59 min]; <sup>1</sup>H NMR (400 MHz,  $\text{CDCl}_3$ )  $\delta$  (ppm) 9.49 (s, 1H), 7.37 (t,  $J = 7.6$  Hz, 1H), 7.24 (t,  $J = 8.0$  Hz, 1H), 7.16 (d,  $J = 7.6$  Hz, 1H), 7.10–7.02 (m, 2H), 6.98–6.87 (m, 3H), 6.79 (d,  $J = 7.9$  Hz, 1H), 4.85–4.70 (m, 1H), 4.44 (d,  $J = 10.8$  Hz, 1H), 3.81 (s, 3H), 3.77 (dd,  $J = 14.6, 6.3$  Hz, 1H), 3.25 (s, 3H), 2.47 (dd,  $J = 14.6, 8.9$  Hz, 1H), 2.07 (d,  $J = 10.2$  Hz, 1H); <sup>13</sup>C NMR (100 MHz,  $\text{CDCl}_3$ )  $\delta$  (ppm) 192.7, 177.1, 159.6, 147.0, 144.6, 142.9, 141.0, 130.8, 130.0, 129.6, 125.9 (q, <sup>1</sup> $J_{\text{C-F}} = 276.9$  Hz), 123.0, 122.3, 108.9, 61.8, 55.6 (q, <sup>2</sup> $J_{\text{C-F}} = 27.1$  Hz), 45.7, 32.8, 26.3, 21.1; <sup>19</sup>F NMR (376 MHz,  $\text{CDCl}_3$ ):  $\delta$  (ppm) -74.0; HRMS (ESI-TOF)  $m/z$ :  $[\text{M} + \text{Na}]^+$  Calcd for  $\text{C}_{23}\text{H}_{21}\text{F}_3\text{N}_2\text{O}_3\text{Na}$  451.1453; Found 451.1443.



(Hz), 123.0, 122.3, 120.6, 114.7, 112.5, 108.9, 61.8, 55.6 (q,  $^2J_{C-F} = 27.5$  Hz), 55.2, 46.0, 32.8, 26.3.  $^{19}\text{F}$  NMR (376 MHz,  $\text{CDCl}_3$ ):  $\delta$  (ppm)  $-74.0$ ; HRMS (ESI-TOF)  $m/z$ :  $[\text{M} + \text{Na}]^+$  Calcd for  $\text{C}_{23}\text{H}_{21}\text{F}_3\text{N}_2\text{O}_3\text{Na}$  453.1402; Found 453.1394.

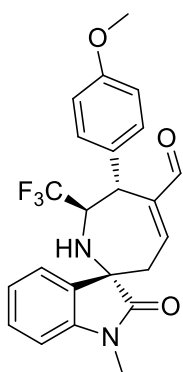

**Synthesis of 3f:** A mixture of (*E*)-2-(4-methoxybenzylidene)but-3-enal **1f** (22.6 mg, 0.120 mmol, 1.2 equiv), (*Z*)-1-methyl-3-((2,2,2-trifluoroethyl)imino)indolin-2-one **2a** (24.2 mg, 0.100 mmol, 1.0 equiv), **C4** (9.1 mg, 0.020 mmol, 0.2 equiv) and **A1** (2.4 mg, 0.020 mmol, 0.2 equiv) in DCE (0.2 mL) was stirred at 50 °C for 15 h. After completion, purification by flash chromatography on silica gel (EtOAc/petroleum ether = 1/7) gave product **3f**: 31.4 mg (0.0730 mmol), as a white solid, 73% yield; mp 235–236 °C;  $[\alpha]_{\text{D}}^{25} = +315.5$  ( $c = 1.5$  in  $\text{CHCl}_3$ ); >19:1 dr; 86% ee, determined

by HPLC analysis [Chiralpak AD-H, *n*-hexane/*i*-PrOH = 80/20, 1.0 mL  $\text{min}^{-1}$ ,  $\lambda = 254$  nm,  $t$  (major) = 6.10 min,  $t$  (minor) = 9.28 min];  $^1\text{H}$  NMR (400 MHz,  $\text{CDCl}_3$ )  $\delta$  (ppm) 9.48 (s, 1H), 7.36 (td,  $J = 7.8, 1.3$  Hz, 1H), 7.34–7.31 (m, 2H), 7.14 (d,  $J = 7.2$  Hz, 1H), 7.05 (t,  $J = 7.5$  Hz, 1H), 6.92–6.87 (m, 2H), 6.83 (d,  $J = 8.7$  Hz, 2H), 4.85–4.70 (m, 1H), 4.40 (d,  $J = 10.8$  Hz, 1H), 3.78 (s, 3H), 3.74 (dd,  $J = 14.4, 6.4$  Hz, 1H), 3.24 (s, 3H), 2.46 (dd,  $J = 14.6, 8.9$  Hz, 1H), 2.04 (d,  $J = 10.1$  Hz, 1H).  $^{13}\text{C}$  NMR (100 MHz,  $\text{CDCl}_3$ )  $\delta$  (ppm) 192.8, 177.2, 158.8, 147.3, 144.1, 142.9, 131.7, 130.8, 130.0, 129.5 (2C), 126.0 (q,  $^1J_{C-F} = 278.7$  Hz), 123.0, 122.3, 114.0 (2C), 108.9, 61.8, 55.7 (q,  $^2J_{C-F} = 27.4$  Hz), 55.2, 45.3, 32.8, 26.3.  $^{19}\text{F}$  NMR (376 MHz,  $\text{CDCl}_3$ ):  $\delta$  (ppm)  $-73.9$ ; HRMS (ESI-TOF)  $m/z$ :  $[\text{M} + \text{Na}]^+$  Calcd for  $\text{C}_{23}\text{H}_{21}\text{F}_3\text{N}_2\text{O}_3\text{Na}$  453.1402; Found 453.1392.

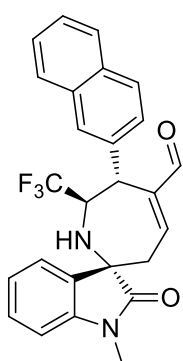

**Synthesis of 3g:** A mixture of (*E*)-2-(naphthalen-2-ylmethylene)but-3-enal **1g** (25.0 mg, 0.120 mmol, 1.2 equiv), (*Z*)-1-methyl-3-((2,2,2-trifluoroethyl)imino)indolin-2-one **2a** (24.2 mg, 0.100 mmol, 1.0 equiv), **C4** (9.1 mg, 0.020 mmol, 0.2 equiv) and **A1** (2.4 mg, 0.020 mmol, 0.2 equiv) in DCE (0.2 mL) was stirred at 50 °C for 12 h. After completion, purification by flash chromatography on silica gel (EtOAc/petroleum ether = 1/7) gave product **3g**: 36.9 mg (0.0820 mmol), as a white solid, 82% yield; mp 229–230 °C;  $[\alpha]_{\text{D}}^{25} = +356.7$  ( $c = 1.8$  in  $\text{CHCl}_3$ ); >19:1 dr; 96%

ee, determined by HPLC analysis [Chiralpak AD-H, *n*-hexane/*i*-PrOH = 80/20, 1.0 mL  $\text{min}^{-1}$ ,  $\lambda = 254$  nm,  $t$  (major) = 5.92 min,  $t$  (minor) = 11.05 min];  $^1\text{H}$  NMR (400 MHz,  $\text{CDCl}_3$ )  $\delta$  (ppm) 9.47 (s, 1H),

7.86 (s, 1H), 7.84–7.75 (m, 3H), 7.53 (d,  $J = 8.7$  Hz, 1H), 7.49–7.41 (m, 2H), 7.37 (t,  $J = 7.7$  Hz, 1H), 7.17 (d,  $J = 7.2$  Hz, 1H), 7.07 (t,  $J = 7.5$  Hz, 1H), 6.98–6.92 (m, 1H), 6.89 (d,  $J = 7.8$  Hz, 1H), 4.85–4.70 (m, 1H), 4.62 (d,  $J = 10.8$  Hz, 1H), 3.88 (dd,  $J = 14.6, 6.1$  Hz, 1H), 3.25 (s, 3H), 2.51 (dd,  $J = 14.7, 8.9$  Hz, 1H), 2.12 (d,  $J = 10.0$  Hz, 1H).  $^{13}\text{C}$  NMR (100 MHz,  $\text{CDCl}_3$ )  $\delta$  (ppm) 192.7, 177.2, 147.1, 144.6, 142.9, 137.0, 133.3, 132.7, 130.8, 130.1, 128.4, 127.9, 127.6, 127.4, 126.5, 126.2, 126.0, 125.9 (q,  $^1J_{\text{C-F}} = 278.3$  Hz), 123.1, 122.4, 109.0, 61.9, 55.8 (q,  $^2J_{\text{C-F}} = 27.3$  Hz), 46.4, 32.9, 26.4.  $^{19}\text{F}$  NMR (376 MHz,  $\text{CDCl}_3$ ):  $\delta$  (ppm)  $-74.2$ ; HRMS (ESI-TOF)  $m/z$ :  $[\text{M} + \text{Na}]^+$  Calcd for  $\text{C}_{26}\text{H}_{21}\text{F}_3\text{N}_2\text{O}_2\text{Na}$  473.1453; Found 473.1456.

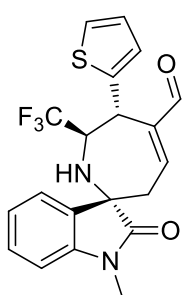

**Synthesis of 3h:** A mixture of (*E*)-2-(thiophen-2-ylmethylene)but-3-enal **1h** (19.7 mg, 0.120 mmol, 1.2 equiv), (*Z*)-1-methyl-3-((2,2,2-trifluoroethyl)imino)indolin-2-one **2a** (24.2 mg, 0.100 mmol, 1.0 equiv), **C4** (9.1 mg, 0.020 mmol, 0.2 equiv) and **A1** (2.4 mg, 0.020 mmol, 0.2 equiv) in DCE (0.2 mL) was stirred at 50 °C for 20 h. After completion, purification by flash chromatography on silica gel (EtOAc/petroleum ether = 1/7) gave product **3h**: 32.4 mg (0.0800 mmol), as a white solid, 80% yield; mp 225–226 °C;  $[\alpha]_{\text{D}}^{25} = +378.8$  ( $c = 1.6$  in  $\text{CHCl}_3$ ); >19:1 dr; 88% ee, determined by HPLC analysis [Chiralpak AD-H, *n*-hexane/*i*-PrOH = 80/20, 1.0 mL min $^{-1}$ ,  $\lambda = 254$  nm,  $t$  (major) = 6.70 min,  $t$  (minor) = 8.14 min];  $^1\text{H}$  NMR (400 MHz,  $\text{CDCl}_3$ )  $\delta$  (ppm) 9.57 (s, 1H), 7.37 (t,  $J = 7.6$  Hz, 1H), 7.20–7.12 (m, 2H), 7.11–7.04 (m, 2H), 6.98–6.84 (m, 3H), 4.95–4.80 (m, 2H), 3.65 (dd,  $J = 14.3, 6.7$  Hz, 1H), 3.25 (s, 3H), 2.44 (dd,  $J = 14.3, 8.7$  Hz, 1H), 2.11 (d,  $J = 9.2$  Hz, 1H).  $^{13}\text{C}$  NMR (100 MHz,  $\text{CDCl}_3$ )  $\delta$  (ppm) 192.1, 177.0, 146.6, 145.1, 142.9, 142.2, 130.6, 130.0, 126.9, 126.1, 125.8 (q,  $^1J_{\text{C-F}} = 279.8$  Hz), 124.4, 123.0, 122.4, 109.0, 60.7, 56.2 (q,  $^2J_{\text{C-F}} = 27.7$  Hz), 39.1, 33.2, 26.3.  $^{19}\text{F}$  NMR (376 MHz,  $\text{CDCl}_3$ ):  $\delta$  (ppm)  $-74.9$ ; HRMS (ESI-TOF)  $m/z$ :  $[\text{M} + \text{Na}]^+$  Calcd for  $\text{C}_{20}\text{H}_{17}\text{F}_3\text{NaO}_2\text{SNa}$  429.0861; Found 429.0852.

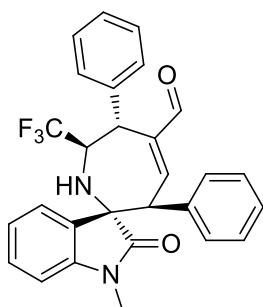

**Synthesis of 3i:** A mixture of (*2E,3E*)-2-benzylidene-4-phenylbut-3-enal **1i** (28.1 mg, 0.120 mmol, 1.2 equiv), (*Z*)-1-methyl-3-((2,2,2-trifluoroethyl)imino)indolin-2-one **2a** (24.2 mg, 0.100 mmol, 1.0 equiv), **C4** (9.1 mg, 0.020 mmol, 0.2 equiv) and **A1** (2.4 mg, 0.020 mmol, 0.2 equiv) in DCE (0.2 mL) was stirred at 50 °C for 12 h. After completion, purification by flash

chromatography on silica gel (EtOAc/petroleum ether = 1/7) gave product **3i**: 42.8 mg (0.0900 mmol), as a white solid, 90% yield; mp 226–227 °C;  $[\alpha]_{\text{D}}^{25} = +298.1$  ( $c = 2.0$  in  $\text{CHCl}_3$ ); >19:1 dr; 92% ee, determined by HPLC analysis [Chiralpak AD-H, *n*-hexane/*i*-PrOH = 80/20, 1.0 mL min<sup>-1</sup>,  $\lambda = 254$  nm,  $t$  (minor) = 4.53 min,  $t$  (major) = 4.99 min]; <sup>1</sup>H NMR (400 MHz,  $\text{CDCl}_3$ )  $\delta$  (ppm) 9.53 (s, 1H), 7.48 (d,  $J = 7.0$  Hz, 2H), 7.32 (t,  $J = 7.5$  Hz, 2H), 7.28–7.22 (m, 3H), 7.14–7.04 (m, 5H), 6.98 (d,  $J = 6.9$  Hz, 2H), 6.50 (d,  $J = 7.7$  Hz, 1H), 5.18 (d,  $J = 6.8$  Hz, 1H), 5.12–5.02 (m, 1H), 4.55 (d,  $J = 10.6$  Hz, 1H), 2.84 (s, 3H), 2.29 (d,  $J = 10.5$  Hz, 1H). <sup>13</sup>C NMR (100 MHz,  $\text{CDCl}_3$ )  $\delta$  (ppm) 192.7, 176.3, 149.8, 145.4, 143.5, 139.3, 134.6, 130.2, 128.76 (2C), 128.75 (2C), 128.4 (2C), 127.9 (2C), 127.7, 127.68, 127.65, 125.9 (q,  $^1J_{\text{C-F}} = 279.1$  Hz), 122.8, 122.5, 108.5, 67.4, 55.5 (q,  $^2J_{\text{C-F}} = 27.2$  Hz), 49.5, 45.6, 25.7. <sup>19</sup>F NMR (376 MHz,  $\text{CDCl}_3$ ):  $\delta$  (ppm) –74.1; HRMS (ESI-TOF)  $m/z$ :  $[\text{M} + \text{Na}]^+$  Calcd for  $\text{C}_{28}\text{H}_{23}\text{F}_3\text{N}_2\text{O}_2\text{Na}$  499.1609; Found 499.1601.

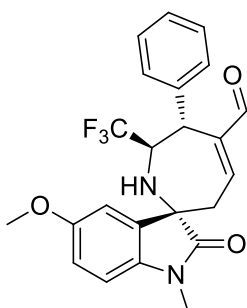

**Synthesis of 3j:** A mixture of (*E*)-2-benzylidenebut-3-enal **1a** (19.0 mg, 0.120 mmol, 1.2 equiv), (*Z*)-5-methoxy-1-methyl-3-((2,2,2-trifluoroethyl)imino)indolin-2-one **2b** (27.2 mg, 0.100 mmol, 1.0 equiv), **C4** (9.1 mg, 0.020 mmol, 0.2 equiv) and **A1** (2.4 mg, 0.020 mmol, 0.2 equiv) in DCE (0.2 mL) was stirred at 50 °C for 14 h. After completion, purification by flash chromatography on silica gel (EtOAc/petroleum ether = 1/7) gave product **3j**: 32.2 mg (0.0750 mmol), as a white solid, 75% yield; mp 220–221 °C;  $[\alpha]_{\text{D}}^{25} = +335.4$  ( $c = 1.6$  in

$\text{CHCl}_3$ ); >19:1 dr; 96% ee, determined by HPLC analysis [Chiralpak AD, *n*-hexane/*i*-PrOH = 90/10, 1.0 mL min<sup>-1</sup>,  $\lambda = 254$  nm,  $t$  (major) = 9.15 min,  $t$  (minor) = 12.20 min]; <sup>1</sup>H NMR (400 MHz,  $\text{CDCl}_3$ )  $\delta$  (ppm) 9.46 (d,  $J = 1.5$  Hz, 1H), 7.41 (d,  $J = 7.0$  Hz, 2H), 7.32–7.27 (m, 2H), 7.25–7.20 (m, 1H), 6.94–6.88 (m, 1H), 6.86 (dd,  $J = 8.5, 2.5$  Hz, 1H), 6.79 (d,  $J = 8.4$  Hz, 1H), 6.75 (d,  $J = 2.5$  Hz, 1H), 4.85–4.70 (m, 1H), 4.44 (d,  $J = 10.8$  Hz, 1H), 3.82–3.74 (m, 4H), 3.21 (s, 3H), 2.46 (dd,  $J = 14.7, 8.9$  Hz, 1H), 2.04 (d,  $J = 9.4$  Hz, 1H); <sup>13</sup>C NMR (100 MHz,  $\text{CDCl}_3$ )  $\delta$  (ppm) 192.7, 176.8, 156.2, 147.2, 144.4, 139.6, 136.2, 132.1, 128.6 (2C), 128.4 (2C), 127.5, 125.9 (q,  $^1J_{\text{C-F}} = 278.4$  Hz), 113.1, 110.8, 109.2, 62.1, 55.9, 55.7 (q,  $^2J_{\text{C-F}} = 27.5$  Hz), 46.1, 32.8, 26.4; <sup>19</sup>F NMR (376 MHz,  $\text{CDCl}_3$ ):  $\delta$  (ppm) –74.0; HRMS (ESI-TOF)  $m/z$ :  $[\text{M} + \text{H}]^+$  Calcd for  $\text{C}_{23}\text{H}_{22}\text{F}_3\text{N}_2\text{O}$  431.1583; Found 431.1583.

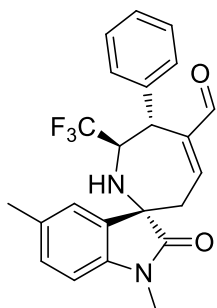

**Synthesis of 3k:** A mixture of (*E*)-2-benzylidenebut-3-enal **1a** (19.0 mg, 0.120 mmol, 1.2 equiv), (*Z*)-1,5-dimethyl-3-((2,2,2-trifluoroethyl)imino)indolin-2-one **2c** (25.6 mg, 0.100 mmol, 1.0 equiv), **C4** (9.1 mg, 0.020 mmol, 0.2 equiv) and **A1** (2.4 mg, 0.020 mmol, 0.2 equiv) in DCE (0.2 mL) was stirred at 50 °C for 14 h. After completion, purification by flash chromatography on silica gel (EtOAc/petroleum ether = 1/7) gave product **3k**: 31.0 mg (0.0750 mmol), as a white solid, 75% yield; mp 225–226 °C;  $[\alpha]_{\text{D}}^{25} = +295.5$  ( $c = 1.5$  in  $\text{CHCl}_3$ ); >19:1

dr; 96% ee, determined by HPLC analysis [Chiralpak IA, *n*-hexane/*i*-PrOH = 90/10, 1.0 mL min<sup>-1</sup>,  $\lambda = 254$  nm,  $t$  (major) = 4.70 min,  $t$  (minor) = 5.43 min]; <sup>1</sup>H NMR (400 MHz,  $\text{CDCl}_3$ )  $\delta$  (ppm) 9.50 (s, 1H), 7.45–7.40 (m, 2H), 7.30 (t,  $J = 7.3$  Hz, 2H), 7.23 (t,  $J = 7.3$  Hz, 1H), 7.16 (d,  $J = 7.8$  Hz, 1H), 6.98–6.89 (m, 2H), 6.78 (d,  $J = 8.0$  Hz, 1H), 4.85–4.70 (m, 1H), 4.46 (d,  $J = 10.8$  Hz, 1H), 3.77 (dd,  $J = 14.6, 6.2$  Hz, 1H), 3.22 (s, 3H), 2.46 (dd,  $J = 14.6, 8.9$  Hz, 1H), 2.33 (s, 3H), 2.04 (d,  $J = 10.0$  Hz, 1H); <sup>13</sup>C NMR (100 MHz,  $\text{CDCl}_3$ )  $\delta$  (ppm) 192.8, 177.1, 147.1, 144.8, 140.4, 139.6, 132.7, 130.9, 130.2, 128.6 (2C), 128.4 (2C), 127.5, 125.9 (q, <sup>1</sup> $J_{\text{C-F}} = 280.0$  Hz), 123.1, 108.7, 61.9, 55.7 (q, <sup>2</sup> $J_{\text{C-F}} = 27.2$  Hz), 46.1, 32.8, 26.4, 21.1; <sup>19</sup>F NMR (376 MHz,  $\text{CDCl}_3$ ):  $\delta$  (ppm) –74.0; HRMS (ESI-TOF)  $m/z$ :  $[\text{M} + \text{H}]^+$  Calcd for  $\text{C}_{23}\text{H}_{22}\text{F}_3\text{N}_2\text{O}_2$  415.1633; Found 415.1639.

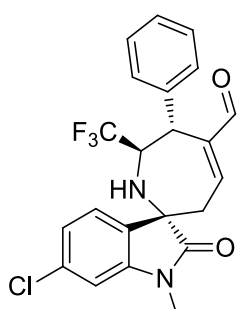

**Synthesis of 3l:** A mixture of (*E*)-2-benzylidenebut-3-enal **1a** (19.0 mg, 0.120 mmol, 1.2 equiv), (*Z*)-6-chloro-1-methyl-3-((2,2,2-trifluoroethyl)imino)indolin-2-one **2d** (27.7 mg, 0.100 mmol, 1.0 equiv), **C4** (9.1 mg, 0.020 mmol, 0.2 equiv) and **A1** (2.4 mg, 0.020 mmol, 0.2 equiv) in DCE (0.2 mL) was stirred at 50 °C for 24 h. After completion, purification by flash chromatography on silica gel (EtOAc/petroleum ether = 1/7) gave product **3l**: 29.5 mg (0.0680 mmol), as a white solid, 68% yield; mp 223–224 °C;  $[\alpha]_{\text{D}}^{25} = +348.7$  ( $c = 1.4$  in  $\text{CHCl}_3$ ); >19:1 dr; 94% ee, determined by HPLC analysis [Chiralpak AD-H, *n*-hexane/*i*-PrOH = 90/10, 1.0 mL min<sup>-1</sup>,  $\lambda = 254$  nm,  $t$  (major) = 8.28 min,  $t$  (minor) = 9.19 min]; <sup>1</sup>H NMR (400 MHz,  $\text{CDCl}_3$ )  $\delta$  (ppm) 9.46 (s, 1H), 7.45–7.35 (m, 2H), 7.34–7.26 (m, 2H), 7.24 (t,  $J = 7.3$  Hz, 1H), 7.08 (d,  $J = 7.9$  Hz, 1H), 7.03 (dd,  $J = 7.9, 1.8$  Hz, 1H), 6.93–6.85 (m, 2H), 4.84–4.67 (m, 1H), 4.44 (d,  $J = 10.8$  Hz, 1H), 3.76 (dd,  $J = 14.6, 6.1$  Hz, 1H), 3.22 (s, 3H), 2.45 (dd,  $J = 14.7, 8.9$  Hz, 1H), 2.04 (d,  $J = 9.9$  Hz, 1H); <sup>13</sup>C NMR (100 MHz,  $\text{CDCl}_3$ )  $\delta$  (ppm) 192.6, 177.1, 147.4, 144.2, 143.9, 139.4, 136.0, 129.1, 128.7 (2C), 128.4 (2C), 127.6, 125.9 (q, <sup>1</sup> $J_{\text{C-F}} = 279.8$  Hz), 123.4, 122.8, 109.7, 61.6, 55.8 (q, <sup>2</sup> $J_{\text{C-F}} = 27.4$  Hz), 46.2, 32.7, 26.5; <sup>19</sup>F NMR (376 MHz,  $\text{CDCl}_3$ ):  $\delta$  (ppm) –73.9; HRMS (ESI-TOF)  $m/z$ :  $[\text{M} + \text{H}]^+$  Calcd for  $\text{C}_{22}\text{H}_{19}^{35}\text{ClF}_3\text{N}_2\text{O}_2$  435.1087; Found 435.1089; Calcd for  $\text{C}_{22}\text{H}_{19}^{37}\text{ClF}_3\text{N}_2\text{O}_2$  437.1058; Found 437.1079.

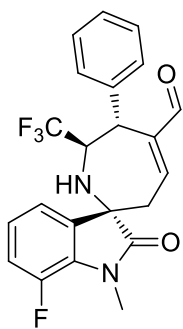

**Synthesis of 3m:** A mixture of (*E*)-2-benzylidenebut-3-enal **1a** (19.0 mg, 0.120 mmol, 1.2 equiv), (*Z*)-7-fluoro-1-methyl-3-((2,2,2-trifluoroethyl)imino)indolin-2-one **2e** (26.0 mg, 0.100 mmol, 1.0 equiv), **C4** (9.1 mg, 0.020 mmol, 0.2 equiv) and **A1** (2.4 mg, 0.020 mmol, 0.2 equiv) in DCE (0.2 mL) was stirred at 50 °C for 12 h. After completion, purification by flash chromatography on silica gel (EtOAc/petroleum ether = 1/7) gave product **3m**: 25.0 mg (0.0600 mmol), as a white solid, 60% yield; mp 220–221 °C;  $[\alpha]_{\text{D}}^{25} = +315.8$  ( $c = 1.2$  in  $\text{CHCl}_3$ ); >19:1 dr; 94% ee, determined by HPLC analysis [Chiralpak AD-H, *n*-hexane/*i*-PrOH = 90/10, 1.0 mL min<sup>-1</sup>,  $\lambda = 254$  nm,  $t$  (major) = 6.91 min,  $t$  (minor) = 9.37 min]; <sup>1</sup>H NMR (400 MHz, CDCl<sub>3</sub>)  $\delta$  (ppm) 9.47 (s, 1H), 7.43–7.38 (m, 2H), 7.33–7.28 (m, 2H), 7.26–7.21 (m, 1H), 7.13–7.06 (m, 1H), 7.03–6.97 (m, 1H), 6.94 (dd,  $J = 7.4, 1.3$  Hz, 1H), 6.89 (dd,  $J = 8.9, 6.2$  Hz, 1H), 4.85–4.70 (m, 1H), 4.45 (d,  $J = 10.8$  Hz, 1H), 3.77 (dd,  $J = 14.7, 6.1$  Hz, 1H), 3.46 (d,  $J = 2.8$  Hz, 3H), 2.48 (dd,  $J = 14.7, 8.9$  Hz, 1H), 2.05 (d,  $J = 10.1$  Hz, 1H); <sup>13</sup>C NMR (100 MHz, CDCl<sub>3</sub>)  $\delta$  (ppm) 192.6, 176.7, 148.0 (d,  $^1J_{\text{C-F}} = 243.6$  Hz), 147.3, 144.0, 139.4, 133.6 (d,  $^4J_{\text{C-F}} = 3.1$  Hz), 129.6 (d,  $^3J_{\text{C-F}} = 8.5$  Hz), 128.7 (2C), 128.4 (2C), 127.6, 125.8 (q,  $^1J_{\text{C-F}} = 279.6$  Hz), 123.8 (d,  $^3J_{\text{C-F}} = 6.3$  Hz), 118.2, 118.1 (d,  $^2J_{\text{C-F}} = 23.6$  Hz), 61.9, 55.6 (q,  $^2J_{\text{C-F}} = 27.5$  Hz), 46.1, 32.8, 28.8; <sup>19</sup>F NMR (376 MHz, CDCl<sub>3</sub>):  $\delta$  (ppm) –74.0, –135.0; HRMS (ESI-TOF)  $m/z$ :  $[\text{M} + \text{H}]^+$  Calcd for C<sub>22</sub>H<sub>19</sub>F<sub>4</sub>N<sub>2</sub>O<sub>2</sub> 419.1383; Found 419.1384.

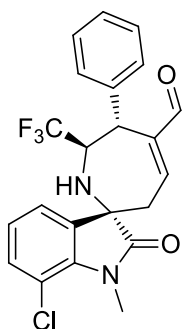

**Synthesis of 3n:** A mixture of (*E*)-2-benzylidenebut-3-enal **1a** (19.0 mg, 0.120 mmol, 1.2 equiv), (*Z*)-7-chloro-1-methyl-3-((2,2,2-trifluoroethyl)imino)indolin-2-one **2f** (27.7 mg, 0.100 mmol, 1.0 equiv), **C4** (9.1 mg, 0.020 mmol, 0.2 equiv) and **A1** (2.4 mg, 0.020 mmol, 0.2 equiv) in DCE (0.2 mL) was stirred at 50 °C for 17 h. After completion, purification by flash chromatography on silica gel (EtOAc/petroleum ether = 1/7) gave product **3n**: 26.0 mg (0.0600 mmol), as a white solid, 60% yield; mp 233–234 °C;  $[\alpha]_{\text{D}}^{25} = +348.2$  ( $c = 1.2$  in  $\text{CHCl}_3$ ); >19:1 dr; 94% ee, determined by HPLC analysis [Chiralpak AD-H, *n*-hexane/*i*-PrOH = 90/10, 1.0 mL min<sup>-1</sup>,  $\lambda = 254$  nm,  $t$  (major) = 7.17 min,  $t$  (minor) = 10.67 min]; <sup>1</sup>H NMR (400 MHz, CDCl<sub>3</sub>)  $\delta$  (ppm) 9.47 (s, 1H), 7.42–7.38 (m, 2H), 7.33–7.22 (m, 4H), 7.05 (d,  $J = 7.0$  Hz, 1H), 6.96 (t,  $J = 7.8$  Hz, 1H), 6.91–6.85 (m, 1H), 4.90–4.75 (m, 1H), 4.44 (d,  $J = 10.8$  Hz, 1H), 3.76 (dd,  $J = 14.5, 6.1$  Hz, 1H), 3.61 (s, 3H), 2.45 (dd,  $J = 14.6, 8.9$  Hz, 1H), 2.02 (d,  $J = 10.2$  Hz, 1H); <sup>13</sup>C NMR (100 MHz, CDCl<sub>3</sub>)  $\delta$  (ppm) 192.6, 177.4, 147.3, 144.0, 139.4, 138.9, 133.5, 132.3, 128.7 (2C), 128.4 (2C), 127.6, 125.9 (q,  $^1J_{\text{C-F}} = 279.8$  Hz), 123.8, 120.9, 116.5, 61.4, 55.7 (q,  $^2J_{\text{C-F}} = 27.4$  Hz), 46.1, 32.9, 29.8; <sup>19</sup>F NMR (376 MHz, CDCl<sub>3</sub>):  $\delta$  (ppm) –74.0; HRMS (ESI-TOF)  $m/z$ :  $[\text{M} + \text{Na}]^+$  Calcd for C<sub>22</sub>H<sub>18</sub><sup>35</sup>ClF<sub>3</sub>N<sub>2</sub>O<sub>2</sub>Na 457.0907; Found 457.0892; Calcd for C<sub>22</sub>H<sub>18</sub><sup>37</sup>ClF<sub>3</sub>N<sub>2</sub>O<sub>2</sub>Na 459.0877; Found 459.0868.

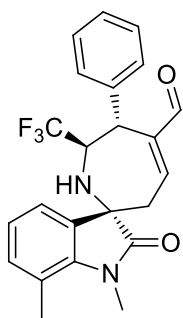

**Synthesis of 3o:** A mixture of (*E*)-2-benzylidenebut-3-enal **1a** (19.0 mg, 0.120 mmol, 1.2 equiv), (*Z*)-1,7-dimethyl-3-((2,2,2-trifluoroethyl)imino)indolin-2-one **2g** (25.6 mg, 0.100 mmol, 1.0 equiv), **C4** (9.1 mg, 0.020 mmol, 0.2 equiv) and **A1** (2.4 mg, 0.020 mmol, 0.2 equiv) in DCE (0.2 mL) was stirred at 50 °C for 12 h. After completion, purification by flash chromatography on silica gel (EtOAc/petroleum ether = 1/7) gave product **3o**: 31.1 mg (0.0750 mmol), as a white solid, 75% yield; mp 219–220 °C;  $[\alpha]_D^{25} = +307.6$  ( $c = 1.5$  in  $\text{CHCl}_3$ ); >19:1 dr; 80% ee, determined

by HPLC analysis [Chiralpak IA, *n*-hexane/*i*-PrOH = 90/10, 1.0 mL min<sup>-1</sup>,  $\lambda = 254$  nm,  $t$  (major) = 7.03 min,  $t$  (minor) = 8.89 min]; <sup>1</sup>H NMR (400 MHz,  $\text{CDCl}_3$ )  $\delta$  (ppm) 9.47 (s, 1H), 7.44–7.39 (m, 2H), 7.33–7.27 (m, 2H), 7.23 (t,  $J = 7.3$  Hz, 1H), 7.08 (d,  $J = 7.4$  Hz, 1H), 6.98 (d,  $J = 6.3$  Hz, 1H), 6.95–6.89 (m, 2H), 4.89–4.74 (m, 1H), 4.44 (d,  $J = 10.8$  Hz, 1H), 3.76 (dd,  $J = 14.6, 6.2$  Hz, 1H), 3.52 (s, 3H), 2.59 (s, 3H), 2.45 (dd,  $J = 14.6, 8.9$  Hz, 1H), 2.02 (d,  $J = 10.2$  Hz, 1H); <sup>13</sup>C NMR (100 MHz,  $\text{CDCl}_3$ )  $\delta$  (ppm) 192.7, 177.8, 147.0, 144.8, 140.5, 139.6, 133.7, 131.6, 128.6 (2C), 128.4 (2C), 127.4, 125.9 (q,  $^1J_{\text{C-F}} = 279.9$  Hz), 123.0, 120.7, 120.2, 61.1, 55.7 (q,  $^2J_{\text{C-F}} = 27.47$  Hz), 46.1, 33.0, 29.7, 19.0; <sup>19</sup>F NMR (376 MHz,  $\text{CDCl}_3$ ):  $\delta$  (ppm) –74.0; HRMS (ESI-TOF)  $m/z$ :  $[\text{M} + \text{H}]^+$  Calcd for  $\text{C}_{23}\text{H}_{22}\text{F}_3\text{N}_2\text{O}_2$  415.1633; Found 415.1635.

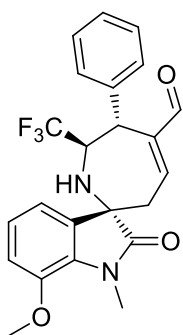

**Synthesis of 3p:** A mixture of (*E*)-2-benzylidenebut-3-enal **1a** (19.0 mg, 0.120 mmol, 1.2 equiv), (*Z*)-7-methoxy-1-methyl-3-((2,2,2-trifluoroethyl)imino)indolin-2-one **2h** (27.2 mg, 0.100 mmol, 1.0 equiv), **C4** (9.1 mg, 0.020 mmol, 0.2 equiv) and **A1** (2.4 mg, 0.020 mmol, 0.2 equiv) in DCE (0.2 mL) was stirred at 50 °C for 14 h. After completion, purification by flash chromatography on silica gel (EtOAc/petroleum ether = 1/7) gave product **3p**: 33.5 mg (0.0780 mmol), as a white solid, 78% yield;

mp 227–228 °C;  $[\alpha]_D^{25} = +346.3$  ( $c = 1.6$  in  $\text{CHCl}_3$ ); >19:1 dr; 94% ee, determined by HPLC analysis [Chiralpak IA, *n*-hexane/*i*-PrOH = 90/10, 1.0 mL min<sup>-1</sup>,  $\lambda = 254$  nm,  $t$  (major) = 7.69 min,  $t$  (minor) = 9.50 min]; <sup>1</sup>H NMR (400 MHz,  $\text{CDCl}_3$ )  $\delta$  (ppm) 9.46 (s, 1H), 7.46–7.38 (m, 2H), 7.34–7.26 (m, 2H), 7.26–7.20 (m, 1H), 7.00 (t,  $J = 7.9$  Hz, 1H), 6.95–6.85 (m, 2H), 6.76 (d,  $J = 7.3$  Hz, 1H), 4.85–4.70 (m, 1H), 4.44 (d,  $J = 10.8$  Hz, 1H), 3.86 (s, 3H), 3.75 (dd,  $J = 14.7, 6.2$  Hz, 1H), 3.50 (s, 3H), 2.46 (dd,  $J = 14.7, 8.8$  Hz, 1H), 2.04 (d,  $J = 10.0$  Hz, 1H); <sup>13</sup>C NMR (100 MHz,  $\text{CDCl}_3$ )  $\delta$  (ppm) 192.7, 177.3, 147.0, 145.9, 144.9, 139.6, 132.3, 130.7, 128.6 (2C), 128.4 (2C), 127.4, 125.9 (q,  $^1J_{\text{C-F}} = 279.4$  Hz), 123.8, 114.8, 113.8, 61.7, 56.1, 55.6 (q,  $^2J_{\text{C-F}} = 27.2$  Hz), 46.0, 33.0, 29.7; <sup>19</sup>F NMR (376 MHz,  $\text{CDCl}_3$ ):  $\delta$  (ppm) –74.0; HRMS (ESI-TOF)  $m/z$ :  $[\text{M} + \text{Na}]^+$  Calcd for  $\text{C}_{23}\text{H}_{21}\text{F}_3\text{N}_2\text{O}_3\text{Na}$  453.1402; Found 453.1403.

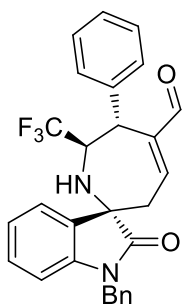

**Synthesis of 3q:** A mixture of (*E*)-2-benzylidenebut-3-enal **1a** (19.0 mg, 0.120 mmol, 1.2 equiv), (*Z*)-1-benzyl-3-((2,2,2-trifluoroethyl)imino)indolin-2-one **2i** (31.8 mg, 0.100 mmol, 1.0 equiv), **C4** (9.1 mg, 0.020 mmol, 0.2 equiv) and **A1** (2.4 mg, 0.020 mmol, 0.2 equiv) in DCE (0.2 mL) was stirred at 50 °C for 12 h. After completion, purification by flash chromatography on silica gel (EtOAc/petroleum ether = 1/7) gave product **3q**: 37.1 mg (0.0780 mmol), as a white solid, 78% yield; mp 223–

224 °C;  $[\alpha]_D^{25} = +298.4$  ( $c = 1.8$  in  $\text{CHCl}_3$ ); >19:1 dr; 93% ee, determined by HPLC analysis [Chiralpak AD-H, *n*-hexane/*i*-PrOH = 90/10, 1.0 mL min<sup>-1</sup>,  $\lambda = 254$  nm,  $t$  (major) = 9.24 min,  $t$  (minor) = 11.90 min]; <sup>1</sup>H NMR (400 MHz,  $\text{CDCl}_3$ )  $\delta$  (ppm) 9.48 (s, 1H), 7.46–7.40 (m, 2H), 7.35–7.27 (m, 6H), 7.26–7.20 (m, 3H), 7.15 (d,  $J = 7.3$  Hz, 1H), 7.01 (t,  $J = 7.5$  Hz, 1H), 6.97–6.91 (m, 1H), 6.77 (d,  $J = 7.7$  Hz, 1H), 5.00–4.88 (m, 3H), 4.47 (d,  $J = 10.7$  Hz, 1H), 3.86 (dd,  $J = 14.7, 6.2$  Hz, 1H), 2.54 (dd,  $J = 14.6, 8.9$  Hz, 1H), 2.09 (d,  $J = 9.6$  Hz, 1H); <sup>13</sup>C NMR (100 MHz,  $\text{CDCl}_3$ )  $\delta$  (ppm) 192.7, 177.2, 147.2, 144.5, 142.0, 139.6, 135.3, 130.9, 129.9, 128.9 (2C), 128.7 (2C), 128.4 (2C), 127.8, 127.5, 127.2 (2C), 126.7 (q,  $^1J_{\text{C-F}} = 279.3$  Hz), 123.1, 122.4, 109.9, 61.8, 55.7 (q,  $^2J_{\text{C-F}} = 27.8$  Hz), 46.1, 43.7, 32.6; <sup>19</sup>F NMR (376 MHz,  $\text{CDCl}_3$ ):  $\delta$  (ppm) –74.0; HRMS (ESI-TOF)  $m/z$ :  $[\text{M} + \text{Na}]^+$  Calcd for  $\text{C}_{28}\text{H}_{23}\text{F}_3\text{N}_2\text{O}_2\text{Na}$  499.1609; Found 499.1612.

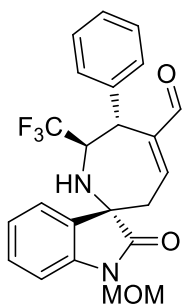

**Synthesis of 3r:** A mixture of (*E*)-2-benzylidenebut-3-enal **1a** (19.0 mg, 0.120 mmol, 1.2 equiv), (*Z*)-1-(methoxymethyl)-3-((2,2,2-trifluoroethyl)imino)indolin-2-one **2j** (27.2 mg, 0.100 mmol, 1.0 equiv), **C4** (9.1 mg, 0.020 mmol, 0.2 equiv) and **A1** (2.4 mg, 0.020 mmol, 0.2 equiv) in DCE (0.2 mL) was stirred at 50 °C for 12 h. After completion, purification by flash chromatography on silica gel (EtOAc/petroleum ether = 1/7) gave product **3r**: 34.4 mg (0.0800 mmol), as a white semisolid, 80%

yield;  $[\alpha]_D^{25} = +326.7$  ( $c = 1.7$  in  $\text{CHCl}_3$ ); >19:1 dr; 94% ee, determined by HPLC analysis [Chiralpak AD-H, *n*-hexane/*i*-PrOH = 90/10, 1.0 mL min<sup>-1</sup>,  $\lambda = 254$  nm,  $t$  (major) = 6.98 min,  $t$  (minor) = 8.75 min]; <sup>1</sup>H NMR (400 MHz,  $\text{CDCl}_3$ )  $\delta$  (ppm) 9.49 (s, 1H), 7.45–7.40 (m, 2H), 7.38 (t,  $J = 7.9$  Hz, 1H), 7.34–7.28 (m, 2H), 7.27–7.23 (m, 1H), 7.22–7.17 (m, 1H), 7.13–7.08 (m, 2H), 6.96 (dd,  $J = 8.9, 6.1$  Hz, 1H), 5.17 (s, 2H), 4.85–4.70 (m, 1H), 4.46 (d,  $J = 10.8$  Hz, 1H), 3.83 (dd,  $J = 14.6, 6.2$  Hz, 1H), 3.37 (s, 3H), 2.55 (dd,  $J = 14.6, 8.9$  Hz, 1H), 2.12 (br, 1H); <sup>13</sup>C NMR (100 MHz,  $\text{CDCl}_3$ )  $\delta$  (ppm) 192.7, 177.7, 147.2, 144.3, 141.1, 139.5, 130.4, 130.2, 128.7 (2C), 128.4 (2C), 127.5, 125.9 (q,  $^1J_{\text{C-F}} = 279.0$  Hz), 123.6, 122.5, 110.4, 71.3, 62.1, 56.3, 55.7 (q,  $^2J_{\text{C-F}} = 27.1$  Hz), 46.2, 32.6; <sup>19</sup>F NMR (376 MHz,  $\text{CDCl}_3$ ):  $\delta$  (ppm) –74.1; HRMS (ESI-TOF)  $m/z$ :  $[\text{M} + \text{H}]^+$  Calcd for  $\text{C}_{23}\text{H}_{22}\text{F}_3\text{N}_2\text{O}_3$  431.1580; Found 431.1588.

## 4.2 $\beta,\gamma'$ -Regioselective [4+2] annulations of $\alpha$ -vinylenals **1** with 2-(thiochroman-4-ylidene)malononitriles **4**

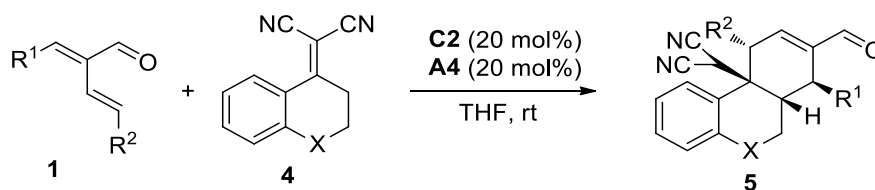

A mixture of  $\alpha$ -vinylenal **1** (0.120 mmol, 1.2 equiv),  $\alpha,\alpha$ -dicyanoalkene **4** (21.2 mg, 0.100 mmol, 1.0 equiv), **C2** (4.72 mg, 0.020 mmol, 0.2 equiv) and **A4** (3.34 mg, 0.020 mmol, 0.2 equiv) in THF (0.2 mL) was stirred at rt for 12 h, and the reaction was monitored by TLC. After completion, the product **5** was obtained by flash chromatography on silica gel (EtOAc/petroleum ether). The racemic **5** was obtained under the catalysis of racemic amine **C1**.

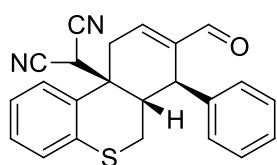

**Synthesis of 5a:** A mixture of (*E*)-2-benzylidenebut-3-enal **1a** (19.0 mg, 0.120 mmol, 1.2 equiv), 2-(thiochroman-4-ylidene)malononitrile **4a** (21.2 mg, 0.100 mmol, 1.0 equiv), **C2** (4.72 mg, 0.020 mmol, 0.2 equiv) and **A4** (3.34 mg, 0.020 mmol, 0.2 equiv) in THF (0.2 mL) was stirred at room temperature for 12 h. After completion, purification by flash chromatography on silica gel (EtOAc/petroleum ether = 1/7) gave the product **5a**: 34.0 mg (0.0920 mmol), as a yellow solid, 92% yield; mp = 121–122 °C;  $[\alpha]_D^{25} = +112.3$  ( $c = 1.7$  in  $\text{CHCl}_3$ ); >19:1 dr; 98% ee, determined by HPLC analysis [Chiralpak AD-H, *n*-hexane/*i*-PrOH = 90/10, 1.0 mL min<sup>-1</sup>,  $\lambda = 254$  nm,  $t$  (minor) = 14.28 min,  $t$  (major) = 21.55 min]; <sup>1</sup>H NMR (400 MHz,  $\text{CDCl}_3$ )  $\delta$  (ppm) 9.18 (s, 1H), 7.34–7.22 (m, 6H), 7.20–7.15 (m, 2H), 7.14–7.09 (m, 1H), 6.96 (d,  $J = 4.2$  Hz, 1H), 4.36 (s, 1H), 3.65 (dd,  $J = 18.7, 6.5$  Hz, 1H), 3.35 (d,  $J = 9.9$  Hz, 1H), 3.12 (d,  $J = 18.7$  Hz, 1H), 3.00–2.90 (m, 2H), 2.72–2.64 (m, 1H); <sup>13</sup>C NMR (100 MHz,  $\text{CDCl}_3$ )  $\delta$  (ppm) 191.2, 143.5, 143.3, 139.9, 132.4, 129.5, 128.9 (2C), 128.3 (2C), 127.69, 127.63, 127.5, 127.2, 125.3, 110.7, 110.5, 43.3, 42.2, 41.8, 31.5, 31.1, 22.8. HRMS (ESI-TOF)  $m/z$ :  $[\text{M} + \text{Na}]^+$  Calcd for  $\text{C}_{23}\text{H}_{18}\text{N}_2\text{OSNa}$  393.1038; Found 393.1033.

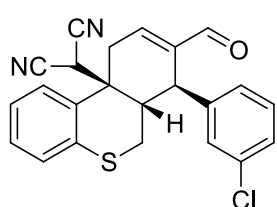

**Synthesis of 5b:** A mixture of (*E*)-2-(3-chlorobenzylidene)but-3-enal **1j** (23.1 mg, 0.120 mmol, 1.2 equiv), 2-(thiochroman-4-ylidene)malononitrile **4a** (21.2 mg, 0.100 mmol, 1.0 equiv), **C2** (4.72 mg, 0.020 mmol, 0.2 equiv) and **A4** (3.34 mg, 0.020 mmol, 0.2 equiv) in THF (0.2 mL) was stirred at room temperature for 12 h. After completion, purification by flash chromatography on silica gel (EtOAc/petroleum ether = 1/7) gave the product **5b**: 30.3 mg (0.0750 mmol), as a yellow solid, 75% yield; mp = 128–129 °C;  $[\alpha]_D^{25} = +100.4$  ( $c = 1.5$  in  $\text{CHCl}_3$ ); >19:1 dr; 94% ee, determined by HPLC analysis [Chiralpak AD-H, *n*-hexane/*i*-PrOH = 80/20, 1.0 mL min<sup>-1</sup>,  $\lambda = 254$  nm,  $t$  (minor)



= 8.64 min, t (major) = 12.10 min];  $^1\text{H}$  NMR (400 MHz,  $\text{CDCl}_3$ )  $\delta$  (ppm)  $\delta$  9.20 (s, 1H), 7.30–7.20 (m, 5H), 7.17–7.11 (m, 2H), 7.10–7.07 (m, 1H), 7.00 (d,  $J = 5.8$  Hz, 1H), 4.35 (s, 1H), 3.67 (dd,  $J = 18.8, 6.5$  Hz, 1H), 3.33 (d,  $J = 10.8$  Hz, 1H), 3.13 (d,  $J = 19.1$  Hz, 1H), 3.00 (dd,  $J = 13.7, 5.3$  Hz, 1H), 2.90 (d,  $J = 13.7$  Hz, 1H), 2.64 (dd,  $J = 9.9, 4.5$  Hz, 1H);  $^{13}\text{C}$  NMR (100 MHz,  $\text{CDCl}_3$ )  $\delta$  (ppm) 191.0, 144.2, 143.0, 142.1, 134.8, 132.2, 130.1, 129.6, 128.1, 127.8, 127.7, 127.5, 127.0, 126.7, 125.4, 110.6, 110.4, 43.3, 41.9, 41.6, 31.5, 31.1, 22.8. HRMS (ESI-TOF)  $m/z$ :  $[\text{M} + \text{H}]^+$  Calcd for  $\text{C}_{23}\text{H}_{18}^{35}\text{ClN}_2\text{OS}$  403.0672; Found 403.0677; Calcd for  $\text{C}_{23}\text{H}_{18}^{37}\text{ClN}_2\text{OS}$  405.0642; Found 405.0652.

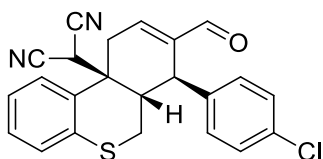

**Synthesis of 5c:** A mixture of (*E*)-2-(4-chlorobenzylidene)but-3-enal **1k** (23.1 mg, 0.120 mmol, 1.2 equiv), 2-(thiochroman-4-ylidene) malononitrile **4a** (21.2 mg, 0.100 mmol, 1.0 equiv), **C2** (4.72 mg, 0.020 mmol, 0.2 equiv) and **A4** (3.34 mg, 0.020 mmol, 0.2 equiv) in THF (0.2

mL) was stirred at room temperature for 12 h. After completion, purification by flash chromatography on silica gel (EtOAc/petroleum ether = 1/7) gave the product **5c**: 37.1 mg (0.0920 mmol), as a yellow solid, 92% yield; mp = 123–124 °C;  $[\alpha]_{\text{D}}^{25} = +102.3$  ( $c = 1.8$  in  $\text{CHCl}_3$ ); >19:1 dr; 98% ee, determined by HPLC analysis [Chiralpak AD-H, *n*-hexane/*i*-PrOH = 80/20, 1.0 mL  $\text{min}^{-1}$ ,  $\lambda = 254$  nm, t (minor) = 9.09 min, t (major) = 13.12 min];  $^1\text{H}$  NMR (400 MHz,  $\text{CDCl}_3$ )  $\delta$  (ppm) 9.19 (s, 1H), 7.32–7.22 (m, 5H), 7.15–7.10 (m, 3H), 6.98 (d,  $J = 6.5$  Hz, 1H), 4.35 (s, 1H), 3.66 (dd,  $J = 18.8, 6.5$  Hz, 1H), 3.34 (d,  $J = 10.2$  Hz, 1H), 3.11 (d,  $J = 18.7$  Hz, 1H), 2.98 (dd,  $J = 13.7, 5.4$  Hz, 1H), 2.88 (d,  $J = 12.7$  Hz, 1H), 2.63 (dd,  $J = 9.9, 4.3$  Hz, 1H);  $^{13}\text{C}$  NMR (100 MHz,  $\text{CDCl}_3$ )  $\delta$  (ppm) 191.1, 144.1, 143.2, 138.5, 133.3, 132.2, 129.6, 129.5 (2C), 129.14, 129.12, 127.7, 127.5, 127.0, 125.4, 110.6, 110.4, 43.3, 41.7, 41.6, 31.5, 31.1, 22.8. HRMS (ESI-TOF)  $m/z$ :  $[\text{M} - \text{H}]^+$  Calcd for  $\text{C}_{23}\text{H}_{16}^{35}\text{ClN}_2\text{OS}$  403.0672; Found 403.0674; Calcd for  $\text{C}_{23}\text{H}_{16}^{37}\text{ClN}_2\text{OS}$  405.0642; Found 405.0640.

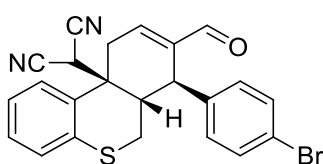

**Synthesis of 5d:** A mixture of (*E*)-2-(4-bromobenzylidene)but-3-enal **1c** (28.3 mg, 0.120 mmol, 1.2 equiv), 2-(thiochroman-4-ylidene) malononitrile **4a** (21.2 mg, 0.100 mmol, 1.0 equiv), **C2** (4.72 mg, 0.020 mmol, 0.2 equiv) and **A4** (3.34 mg, 0.020 mmol, 0.2 equiv) in THF (0.2

mL) was stirred at room temperature for 12 h. After completion, purification by flash chromatography on silica gel (EtOAc/petroleum ether = 1/7) gave the product **5d**: 38.5 mg (0.0860 mmol), as a yellow solid, 86% yield; mp = 127–128 °C;  $[\alpha]_{\text{D}}^{25} = +107.2$  ( $c = 1.9$  in  $\text{CHCl}_3$ ); >19:1 dr; 96% ee, determined by HPLC analysis [Chiralpak AD-H, *n*-hexane/*i*-PrOH = 80/20, 1.0 mL  $\text{min}^{-1}$ ,  $\lambda = 254$  nm, t (minor) = 9.59 min, t (major) = 14.44 min];  $^1\text{H}$  NMR (400 MHz,  $\text{CDCl}_3$ )  $\delta$  (ppm) 9.19 (s, 1H), 7.44 (d,  $J = 8.0$  Hz, 2H), 7.30–7.22 (m, 3H), 7.16–7.10 (m, 1H), 7.07 (d,  $J = 8.1$  Hz, 2H), 6.98 (d,  $J = 6.6$  Hz, 1H), 4.34 (s, 1H), 3.66 (dd,  $J = 18.8, 6.5$  Hz, 1H), 3.33 (d,  $J = 10.3$  Hz, 1H), 3.11 (d,  $J = 18.7$  Hz,

1H), 2.98 (dd,  $J = 13.7, 5.3$  Hz, 1H), 2.88 (d,  $J = 13.6$  Hz, 1H), 2.62 (dd,  $J = 10.3, 4.3$  Hz, 1H);  $^{13}\text{C}$  NMR (100 MHz,  $\text{CDCl}_3$ )  $\delta$  (ppm) 191.1, 144.1, 143.1, 139.0, 132.2, 132.0 (2C), 129.9 (2C), 129.6, 127.7, 127.5, 127.0, 125.4, 121.4, 110.6, 110.4, 43.2, 41.7, 41.6, 31.5, 31.1, 22.8. HRMS (ESI-TOF)  $m/z$ :  $[\text{M} + \text{Na}]^+$  Calcd for  $\text{C}_{23}\text{H}_{17}^{79}\text{BrN}_2\text{OSNa}$  471.0143; Found 471.0141; Calcd for  $\text{C}_{23}\text{H}_{17}^{81}\text{BrN}_2\text{OSNa}$  473.0122; Found 473.0118.

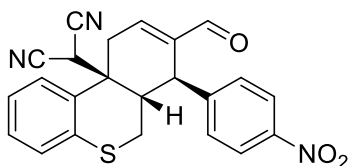

**Synthesis of 5e:** A mixture of (*E*)-2-(4-nitrobenzylidene)but-3-enal **11** (24.4 mg, 0.120 mmol, 1.2 equiv), 2-(thiochroman-4-ylidene) malononitrile **4a** (21.2 mg, 0.100 mmol, 1.0 equiv), **C2** (4.72 mg, 0.020 mmol, 0.2 equiv) and **A4** (3.34 mg, 0.020 mmol, 0.2 equiv) in THF (0.2 mL) was stirred at room temperature for 12 h. After completion, purification by flash chromatography on silica gel (EtOAc/petroleum ether = 1/7) gave the product **5e**: 26.9 mg (0.0650 mmol), as a yellow solid, 65% yield; mp = 136–137 °C;  $[\alpha]_{\text{D}}^{25} = +104.5$  ( $c = 1.5$  in  $\text{CHCl}_3$ ); >19:1 dr; 92% ee, determined by HPLC analysis [Chiralpak IA, *n*-hexane/*i*-PrOH = 80/20, 1.0 mL min<sup>-1</sup>,  $\lambda = 254$  nm,  $t$  (minor) = 16.51 min,  $t$  (major) = 21.01 min];  $^1\text{H}$  NMR (400 MHz,  $\text{CDCl}_3$ )  $\delta$  (ppm) 9.22 (s, 1H), 8.20 (d,  $J = 8.3$  Hz, 2H), 7.39 (d,  $J = 8.3$  Hz, 2H), 7.34–7.25 (m, 3H), 7.19–7.13 (m, 1H), 7.09 (d,  $J = 6.5$  Hz, 1H), 4.35 (s, 1H), 3.73 (dd,  $J = 19.0, 6.5$  Hz, 1H), 3.50 (d,  $J = 10.4$  Hz, 1H), 3.17 (d,  $J = 18.7$  Hz, 1H), 3.02 (dd,  $J = 13.9, 5.3$  Hz, 1H), 2.79 (d,  $J = 13.8$  Hz, 1H), 2.67 (dd,  $J = 10.3, 4.2$  Hz, 1H);  $^{13}\text{C}$  NMR (100 MHz,  $\text{CDCl}_3$ )  $\delta$  (ppm) 191.0, 147.9, 147.3, 145.5, 142.6, 132.0, 129.8, 129.1 (2C), 127.7, 127.6, 126.8, 125.6, 124.1 (2C), 110.5, 110.3, 43.2, 42.0, 41.3, 31.6, 31.2, 22.7. HRMS (ESI-TOF)  $m/z$ :  $[\text{M} - \text{H}]^+$  Calcd for  $\text{C}_{23}\text{H}_{16}\text{N}_3\text{O}_3\text{S}$  414.0912; Found 414.0916.

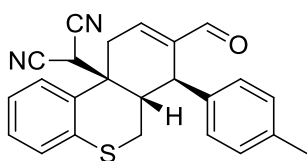

**Synthesis of 5f:** A mixture of (*E*)-2-(4-methylbenzylidene)but-3-enal **1d** (20.6 mg, 0.120 mmol, 1.2 equiv), 2-(thiochroman-4-ylidene)malononitrile **4a** (21.2 mg, 0.100 mmol, 1.0 equiv), **C2** (4.72 mg, 0.020 mmol, 0.2 equiv) and **A4** (3.34 mg, 0.020 mmol, 0.2 equiv) in THF (0.2 mL) was stirred at room temperature for 12 h. After completion, purification by flash chromatography on silica gel (EtOAc/petroleum ether = 1/7) gave the product **5f**: 34.1 mg (0.0890 mmol), as a yellow solid, 89% yield; mp = 130–131 °C;  $[\alpha]_{\text{D}}^{25} = +89.2$  ( $c = 1.7$  in  $\text{CHCl}_3$ ); >19:1 dr; 99% ee, determined by HPLC analysis [Chiralpak AD-H, *n*-hexane/*i*-PrOH = 80/20, 1.0 mL min<sup>-1</sup>,  $\lambda = 254$  nm,  $t$  (minor) = 8.83 min,  $t$  (major) = 10.13 min];  $^1\text{H}$  NMR (400 MHz,  $\text{CDCl}_3$ )  $\delta$  (ppm) 9.17 (s, 1H), 7.30–7.22 (m, 3H), 7.15–7.09 (m, 3H), 7.08–7.04 (m, 2H), 6.94 (d,  $J = 6.5$  Hz, 1H), 4.36 (s, 1H), 3.65 (dd,  $J = 18.5, 6.3$  Hz, 1H), 3.32 (d,  $J = 10.0$  Hz, 1H), 3.12 (d,  $J = 19.3$  Hz, 1H), 2.96 (d,  $J = 3.7$  Hz, 2H), 2.66 (dt,  $J = 10.6, 3.7$  Hz, 1H), 2.31 (s, 3H);  $^{13}\text{C}$  NMR (100 MHz,  $\text{CDCl}_3$ )  $\delta$  (ppm) 191.4, 143.6, 143.1, 137.2, 136.8, 132.4, 129.6 (2C), 129.4, 128.1 (2C), 127.68, 127.62, 127.3, 125.2, 110.8, 110.6, 43.3, 41.9

(2C), 31.5, 31.0, 22.9, 21.1. HRMS (ESI-TOF)  $m/z$ :  $[M + Na]^+$  Calcd for  $C_{24}H_{20}N_2OSNa$  407.1194; Found 407.1190.

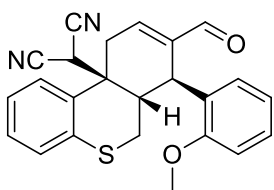

**Synthesis of 5g:** A mixture of (*E*)-2-(2-methoxybenzylidene)but-3-enal **1m** (22.5 mg, 0.120 mmol, 1.2 equiv), 2-(thiochroman-4-ylidene)malononitrile **4a** (21.2 mg, 0.100 mmol, 1.0 equiv), **C2** (4.72 mg, 0.020 mmol, 0.2 equiv) and **A4** (3.34 mg, 0.020 mmol, 0.2 equiv) in THF (0.2 mL) was stirred at room temperature for 12 h. After completion, purification by flash chromatography

on silica gel (EtOAc/petroleum ether = 1/7) gave the product **5g**: 28.0 mg (0.0700 mmol), as a yellow solid, 70% yield; mp = 127–128 °C;  $[\alpha]_D^{25} = +78.0$  ( $c = 1.4$  in  $CHCl_3$ ); >19:1 dr; 98% ee, determined by HPLC analysis [Chiralpak IA, *n*-hexane/*i*-PrOH = 80/20, 1.0 mL min<sup>-1</sup>,  $\lambda = 254$  nm,  $t$  (minor) = 17.20 min,  $t$  (major) = 24.69 min]; <sup>1</sup>H NMR (400 MHz,  $CDCl_3$ )  $\delta$  (ppm) 9.17 (s, 1H), 7.34–7.18 (m, 5H), 7.18–7.05 (m, 1H), 6.99–6.77 (m, 3H), 4.45 (br, 1H), 4.10–3.75 (m, 4H), 3.63 (dd,  $J = 18.4, 6.6$  Hz, 1H), 3.30 (br, 1H), 3.14–3.04 (m, 1H), 3.01–2.86 (m, 2H), 3.30 (br, 1H); <sup>13</sup>C NMR (100 MHz,  $CDCl_3$ )  $\delta$  (ppm) 191.4, 142.7, 132.7, 129.3, 128.7, 127.7, 127.6, 127.4, 125.1, 121.0, 111.3, 110.9, 110.7, 55.5, 43.5, 31.4, 23.4. HRMS (ESI-TOF)  $m/z$ :  $[M + Na]^+$  Calcd for  $C_{24}H_{20}N_2O_2SNa$  423.1143; Found 423.1137.

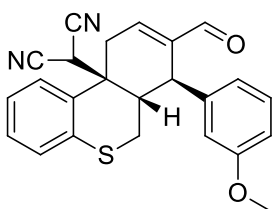

**Synthesis of 5h:** A mixture of (*E*)-2-(3-methoxybenzylidene)but-3-enal **1e** (22.6 mg, 0.120 mmol, 1.2 equiv), 2-(thiochroman-4-ylidene)malononitrile **4a** (21.2 mg, 0.100 mmol, 1.0 equiv), **C2** (4.72 mg, 0.020 mmol, 0.2 equiv) and **A4** (3.34 mg, 0.020 mmol, 0.2 equiv) in THF (0.2 mL) was stirred at room temperature for 12 h. After completion, purification by flash chromatography

on silica gel (EtOAc/petroleum ether = 1/7) gave the product **5h**: 36.0 mg (0.0900 mmol), as a yellow solid, 90% yield; mp = 124–125 °C;  $[\alpha]_D^{25} = +108.7$  ( $c = 1.8$  in  $CHCl_3$ ); >19:1 dr; 97% ee, determined by HPLC analysis [Chiralpak AD-H, *n*-hexane/*i*-PrOH = 80/20, 1.0 mL min<sup>-1</sup>,  $\lambda = 254$  nm,  $t$  (minor) = 11.14 min,  $t$  (major) = 16.20 min]; <sup>1</sup>H NMR (400 MHz,  $CDCl_3$ )  $\delta$  (ppm) 9.19 (s, 1H), 7.30–7.20 (m, 4H), 7.15–7.05 (m, 1H), 6.96 (d,  $J = 6.6$  Hz, 1H), 6.81–6.75 (m, 2H), 6.71 (s, 1H), 4.35 (s, 1H), 3.79 (s, 3H), 3.64 (dd,  $J = 18.8, 6.5$  Hz, 1H), 3.31 (d,  $J = 11.5$  Hz, 1H), 3.10 (d,  $J = 18.6$  Hz, 1H), 2.71–2.62 (m, 2H), 2.68 (dt,  $J = 10.7, 3.6$  Hz, 1H); <sup>13</sup>C NMR (100 MHz,  $CDCl_3$ )  $\delta$  (ppm) 191.2, 159.9, 143.4, 143.1, 141.5, 132.4, 129.9, 129.5, 127.7, 127.6, 127.2, 125.3, 120.7, 114.5, 112.2, 110.7, 110.5, 55.2, 43.3, 42.2, 41.7, 31.5, 31.1, 22.9. HRMS (ESI-TOF)  $m/z$ :  $[M + Na]^+$  Calcd for  $C_{24}H_{20}N_2O_2SNa$  423.1143; Found 423.1136.

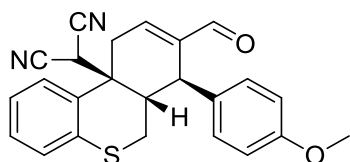

**Synthesis of 5i:** A mixture of (*E*)-2-(4-methoxybenzylidene)but-3-enal **1f** (22.6 mg, 0.120 mmol, 1.2 equiv), 2-(thiochroman-4-ylidene) malononitrile **4a** (21.2 mg, 0.100 mmol, 1.0 equiv), **C2** (4.72 mg, 0.020 mmol, 0.2 equiv) and **A4** (3.34 mg, 0.020 mmol, 0.2 equiv) in THF (0.2 mL) was stirred at room temperature for 12 h. After completion, purification by flash chromatography on silica gel (EtOAc/petroleum ether = 1/7) gave the product **5i**: 36.0 mg (0.0900 mmol), as a yellow solid, 90% yield; mp = 118–119 °C;  $[\alpha]_{\text{D}}^{25} = +121.4$  ( $c = 1.8$  in  $\text{CHCl}_3$ ); >19:1 dr; 96% ee, determined by HPLC analysis [Chiralpak AD-H, *n*-hexane/*i*-PrOH = 80/20, 1.0 mL min<sup>-1</sup>,  $\lambda = 254$  nm,  $t$  (minor) = 13.16 min,  $t$  (major) = 16.70 min]; <sup>1</sup>H NMR (400 MHz, CDCl<sub>3</sub>)  $\delta$  (ppm) 9.17 (s, 1H), 7.29–7.22 (m, 3H), 7.14–7.06 (m, 3H), 6.93 (d,  $J = 6.7$  Hz, 1H), 6.84 (d,  $J = 8.4$  Hz, 2H), 4.36 (s, 1H), 3.78 (s, 3H), 3.64 (dd,  $J = 18.7, 6.5$  Hz, 1H), 3.30 (d,  $J = 10.3$  Hz, 1H), 3.10 (d,  $J = 18.0$  Hz, 1H), 2.96 (d,  $J = 3.8$  Hz, 2H), 2.65 (dt,  $J = 10.6, 3.7$  Hz, 1H); <sup>13</sup>C NMR (100 MHz, CDCl<sub>3</sub>)  $\delta$  (ppm) 191.4, 158.8, 143.6, 142.9, 132.4, 131.7, 129.4, 129.3 (2C), 127.6, 127.6, 127.3, 125.3, 114.3 (2C), 110.8, 110.6, 55.2, 43.3, 42.0, 41.5, 31.5, 31.1, 22.8. HRMS (ESI-TOF)  $m/z$ :  $[\text{M} + \text{Na}]^+$  Calcd for C<sub>24</sub>H<sub>20</sub>N<sub>2</sub>O<sub>2</sub>SNa 423.1143; Found 423.1142.

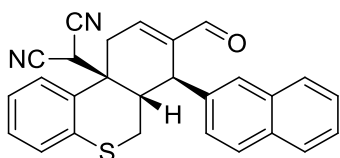

**Synthesis of 5j:** A mixture of (*E*)-2-(naphthalen-2-ylmethylene)but-3-enal **1g** (25.0 mg, 0.120 mmol, 1.2 equiv), 2-(thiochroman-4-ylidene)malononitrile **4a** (21.2 mg, 0.100 mmol, 1.0 equiv), **C2** (4.72 mg, 0.020 mmol, 0.2 equiv) and **A4** (3.34 mg, 0.020 mmol, 0.2 equiv) in THF (0.2 mL) was stirred at room temperature for 12 h. After completion, purification by flash chromatography on silica gel (EtOAc/petroleum ether = 1/7) gave the product **5j**: 31.9 mg (0.0760 mmol), as a yellow solid, 76% yield; mp = 129–130 °C;  $[\alpha]_{\text{D}}^{25} = +112.9$  ( $c = 1.6$  in  $\text{CHCl}_3$ ); >19:1 dr; 98% ee, determined by HPLC analysis [Chiralpak IA, *n*-hexane/*i*-PrOH = 80/20, 1.0 mL min<sup>-1</sup>,  $\lambda = 254$  nm,  $t$  (minor) = 9.43 min,  $t$  (major) = 14.68 min]; <sup>1</sup>H NMR (400 MHz, CDCl<sub>3</sub>)  $\delta$  (ppm) 9.19 (s, 1H), 7.83–7.77 (m, 3H), 7.67 (s, 1H), 7.51–7.42 (m, 2H), 7.32–7.25 (m, 4H), 7.16–7.10 (m, 1H), 7.00 (d,  $J = 6.3$  Hz, 1H), 4.37 (s, 1H), 3.68 (dd,  $J = 18.8, 6.5$  Hz, 1H), 3.52 (d,  $J = 9.0$  Hz, 1H), 3.17 (d,  $J = 18.5$  Hz, 1H), 3.00–2.90 (m, 2H), 2.81–2.75 (m, 1H); <sup>13</sup>C NMR (100 MHz, CDCl<sub>3</sub>)  $\delta$  (ppm) 191.2, 143.4, 137.2, 133.4, 132.7, 132.4, 129.5, 128.8, 127.78 (2C), 127.74 (2C), 127.6, 127.4, 127.3, 126.4, 126.0, 125.8, 125.3, 110.7, 110.6, 43.4, 42.4, 41.7, 31.6, 31.1, 22.9. HRMS (ESI-TOF)  $m/z$ :  $[\text{M} + \text{Na}]^+$  Calcd for C<sub>27</sub>H<sub>20</sub>N<sub>2</sub>OSNa 443.1194; Found 443.1185.

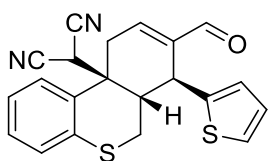

**Synthesis of 5k:** A mixture of (*E*)-2-(thiophen-2-ylmethylene)but-3-enal **1h** (19.7 mg, 0.120 mmol, 1.2 equiv), 2-(thiochroman-4-ylidene)malononitrile **4a** (21.2 mg, 0.100 mmol, 1.0 equiv), **C2** (4.72 mg, 0.020 mmol, 0.2 equiv) and **A4** (3.34 mg, 0.020 mmol, 0.2 equiv) in THF (0.2 mL) was stirred at room

temperature for 12 h. After completion, purification by flash chromatography on silica gel (EtOAc/petroleum ether = 1/7) gave the product **5k**: 35.7 mg (0.0950 mmol), as a yellow solid, 95% yield; mp = 122–123 °C;  $[\alpha]_D^{25} = +93.4$  ( $c = 1.7$  in  $\text{CHCl}_3$ ); >19:1 dr; 99% ee, determined by HPLC analysis [Chiralpak AD-H, *n*-hexane/*i*-PrOH = 80/20, 1.0 mL min<sup>-1</sup>,  $\lambda = 254$  nm,  $t$  (minor) = 9.50 min,  $t$  (major) = 11.51 min]; <sup>1</sup>H NMR (400 MHz,  $\text{CDCl}_3$ )  $\delta$  (ppm) 9.22 (s, 1H), 7.28–7.22 (m, 3H), 7.20 (d,  $J = 4.9$  Hz, 1H), 7.15–7.08 (m, 1H), 7.00–6.97 (m, 1H), 6.96–6.93 (m, 1H), 6.91 (d,  $J = 6.4$  Hz, 1H), 4.38 (s, 1H), 3.71 (d,  $J = 8.9$  Hz, 1H), 3.63 (dd,  $J = 18.8, 6.5$  Hz, 1H), 3.15–3.00 (m, 3H), 2.28–2.72 (m, 1H); <sup>13</sup>C NMR (100 MHz,  $\text{CDCl}_3$ )  $\delta$  (ppm) 190.9, 142.8, 142.4, 142.3, 132.3, 129.6, 127.7, 127.6, 127.15, 127.10, 126.9, 125.3, 124.8, 110.6, 110.4, 43.4, 42.6, 37.6, 31.4, 31.1, 23.1. HRMS (ESI-TOF)  $m/z$ :  $[\text{M} + \text{Na}]^+$  Calcd for  $\text{C}_{21}\text{H}_{16}\text{N}_2\text{OS}_2\text{Na}$  399.0602; Found 399.0600.

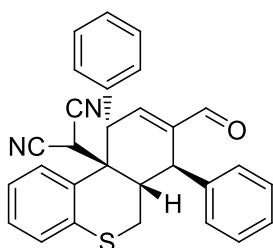

**Synthesis of 5l:** A mixture of (*2E,3E*)-2-benzylidene-4-phenylbut-3-enal **1i** (28.1 mg, 0.120 mmol, 1.2 equiv), 2-(thiochroman-4-ylidene)malononitrile **4a** (21.2 mg, 0.100 mmol, 1.0 equiv), **C2** (4.72 mg, 0.020 mmol, 0.2 equiv) and **A4** (3.34 mg, 0.020 mmol, 0.2 equiv) in THF (0.2 mL) was stirred at room temperature for 12 h. After completion, purification by flash chromatography on silica gel (EtOAc/petroleum ether = 1/7) gave the product **5l**: 31.2 mg

(0.0700 mmol), as a yellow solid, 70% yield; mp = 128–129 °C;  $[\alpha]_D^{25} = +98.2$  ( $c = 1.5$  in  $\text{CHCl}_3$ ); >19:1 dr; 55% ee, determined by HPLC analysis [Chiralpak AD-H, *n*-hexane/*i*-PrOH = 80/20, 1.0 mL min<sup>-1</sup>,  $\lambda = 254$  nm,  $t$  (minor) = 9.47 min,  $t$  (major) = 21.67 min]; <sup>1</sup>H NMR (400 MHz,  $\text{CDCl}_3$ )  $\delta$  (ppm) 9.27 (s, 1H), 7.82 (br, 2H), 7.64–7.54 (m, 4H), 7.44–7.32 (m, 5H), 7.30–7.28 (m, 2H), 7.23–7.17 (m, 1H), 6.97 (d,  $J = 3.7$  Hz, 1H), 5.09 (d,  $J = 5.9$  Hz, 1H), 4.41 (s, 1H), 3.37 (d,  $J = 10.9$  Hz, 1H), 3.07 (dd,  $J = 11.0, 4.0$  Hz, 1H), 2.98 (d,  $J = 13.7$  Hz, 1H), 2.84 (dd,  $J = 13.7, 5.4$  Hz, 1H); <sup>13</sup>C NMR (100 MHz,  $\text{CDCl}_3$ )  $\delta$  (ppm) 191.5, 146.2, 142.4, 139.5, 134.2, 132.6, 131.8 (2C), 130.2, 129.7 (2C), 129.2, 129.1 (2C), 128.3 (2C), 127.9, 127.7, 127.1, 125.4, 111.4, 108.6, 46.8, 45.3, 42.4, 35.3, 28.6, 22.8. HRMS (ESI-TOF)  $m/z$ :  $[\text{M} + \text{Na}]^+$  Calcd for  $\text{C}_{29}\text{H}_{22}\text{N}_2\text{OSNa}$  469.1351; Found 469.1331.

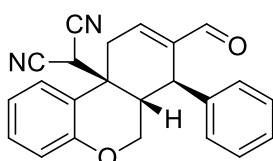

**Synthesis of 5m:** A mixture of (*E*)-2-benzylidenebut-3-enal **1a** (19.0 mg, 0.120 mmol, 1.2 equiv), 2-(chroman-4-ylidene)malononitrile **4b** (21.2 mg, 0.100 mmol, 1.0 equiv), **C2** (4.72 mg, 0.020 mmol, 0.2 equiv) and **A4** (3.34

mg, 0.020 mmol, 0.2 equiv) in THF (0.2 mL) was stirred at room temperature for 12 h. After completion, purification by flash chromatography on silica gel (EtOAc/petroleum ether = 1/7) gave the product **5m**: 17.0 mg (0.0480 mmol), as a yellow solid, 48% yield; mp = 119–120 °C;  $[\alpha]_D^{25} = +100.3$  ( $c = 0.8$  in  $\text{CHCl}_3$ ); >19:1 dr; 93% ee, determined by HPLC analysis [Chiralpak IA, *n*-hexane/*i*-PrOH = 80/20, 1.0 mL min<sup>-1</sup>,  $\lambda = 254$  nm,  $t$  (minor) = 9.16 min,  $t$  (major) = 9.91 min]; <sup>1</sup>H NMR (400 MHz,  $\text{CDCl}_3$ )  $\delta$  (ppm) 9.21 (s, 1H), 7.37–7.33 (m, 2H), 7.32–7.29 (m, 2H), 7.28–7.25 (m, 2H), 7.22 (d,  $J = 7.2$  Hz, 2H), 6.99–6.93 (m, 2H), 6.91 (d,  $J = 5.4$  Hz, 1H), 4.31 (d,  $J = 12.6$  Hz, 1H), 4.24–4.13 (m, 2H), 3.65–3.55 (m, 2H), 3.14 (d,  $J = 18.7$  Hz, 1H), 2.49 (d,  $J = 9.5$  Hz, 1H); <sup>13</sup>C NMR (100 MHz,  $\text{CDCl}_3$ )  $\delta$  (ppm) 191.3, 153.2, 143.0, 142.7, 140.6, 131.0, 128.9 (2C), 128.4 (2C), 127.3, 126.2, 121.4, 118.1, 117.7, 110.6, 110.4, 61.9, 41.4, 40.6, 40.4, 35.2, 30.4. HRMS (ESI-TOF)  $m/z$ :  $[\text{M} + \text{Na}]^+$  Calcd for  $\text{C}_{23}\text{H}_{18}\text{N}_2\text{O}_2\text{Na}$  377.1266; Found 377.1268.

## 5. Transformation of product **3a**

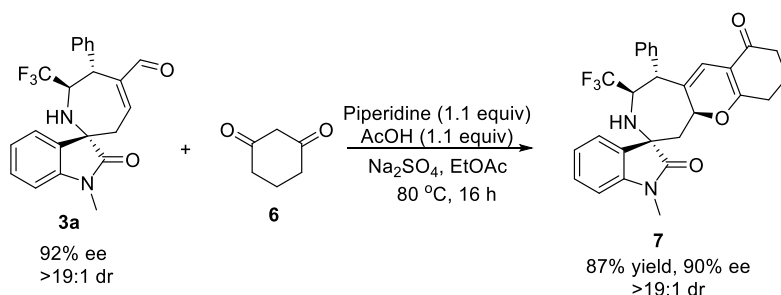

**Synthesis of 7:** To a solution of **3a** (40.0 mg, 0.100 mmol, 1.0 equiv) in EtOAc (1.0 mL) was added cyclohexane-1,3-dione **6** (16.8 mg, 0.150 mmol, 1.5 equiv), piperidine (9.36 mg, 0.110 mmol, 1.1 equiv), AcOH (6.60 mg, 0.110 mmol, 1.1 equiv) and  $\text{Na}_2\text{SO}_4$  (4.26 mg, 0.030 mmol, 0.3 equiv). The mixture was stirred at 80 °C for 16 h. After completion, it was purified by flash chromatography on silica gel (EtOAc/petroleum ether = 1/7) to give the product **7**: 42.9 mg (0.0870 mmol), as a white semisolid, 87% yield;  $[\alpha]_D^{25} = +288.2$  ( $c = 2.0$  in  $\text{CHCl}_3$ ); >19:1 dr; 90% ee, determined by HPLC analysis [Chiralpak AD-H, *n*-hexane/*i*-PrOH = 80/20, 1.0 mL min<sup>-1</sup>,  $\lambda = 254$  nm,  $t$  (minor) = 6.15 min,  $t$  (major) = 8.07 min]; <sup>1</sup>H NMR (400 MHz,  $\text{CHCl}_3$ )  $\delta$  (ppm) 7.55–7.49 (m, 2H), 7.40–7.30 (m, 3H), 7.29–7.21 (m, 2H), 7.10 (t,  $J = 7.5$  Hz, 1H), 6.88 (d,  $J = 7.7$  Hz, 1H), 6.60 (s, 1H), 5.90 (dd,  $J = 10.8, 3.2$  Hz, 1H), 5.35–5.20 (m, 1H), 3.96 (d,  $J = 10.3$  Hz, 1H), 3.26 (s, 3H), 2.51 (dd,  $J = 13.3, 10.8$  Hz, 1H), 2.38 (t,  $J = 6.4$  Hz, 2H), 2.28 (t,  $J = 5.7$  Hz, 2H), 2.05 (dd,  $J = 13.3, 3.2$  Hz, 1H), 1.98–1.80 (m, 3H); <sup>13</sup>C NMR (100 MHz,  $\text{CDCl}_3$ )  $\delta$  (ppm) 194.9, 176.3, 170.1, 142.2, 140.7, 132.0, 131.1, 129.4, 129.1 (2C), 127.1, 126.8 (2C), 125.9 (q,  $^1J_{\text{C-F}} = 280.0$  Hz), 123.3, 122.6, 115.7, 111.9, 108.7, 71.8, 59.4, 53.8 (q,  $^2J_{\text{C-F}} = 26.9$  Hz), 51.9, 43.0, 36.3, 27.9, 26.1, 20.5; <sup>19</sup>F NMR (376 MHz,  $\text{CDCl}_3$ ):  $\delta$  (ppm) –74.2; HRMS (ESI-TOF)  $m/z$ :  $[\text{M} + \text{H}]^+$  Calcd for  $\text{C}_{28}\text{H}_{26}\text{F}_3\text{N}_2\text{O}_3$  495.1896; Found 495.1892.

## 6. More screening studies on other 1,3-dipoles, $\alpha$ -vinylenals and $\alpha,\alpha$ -dicyanoalkenes

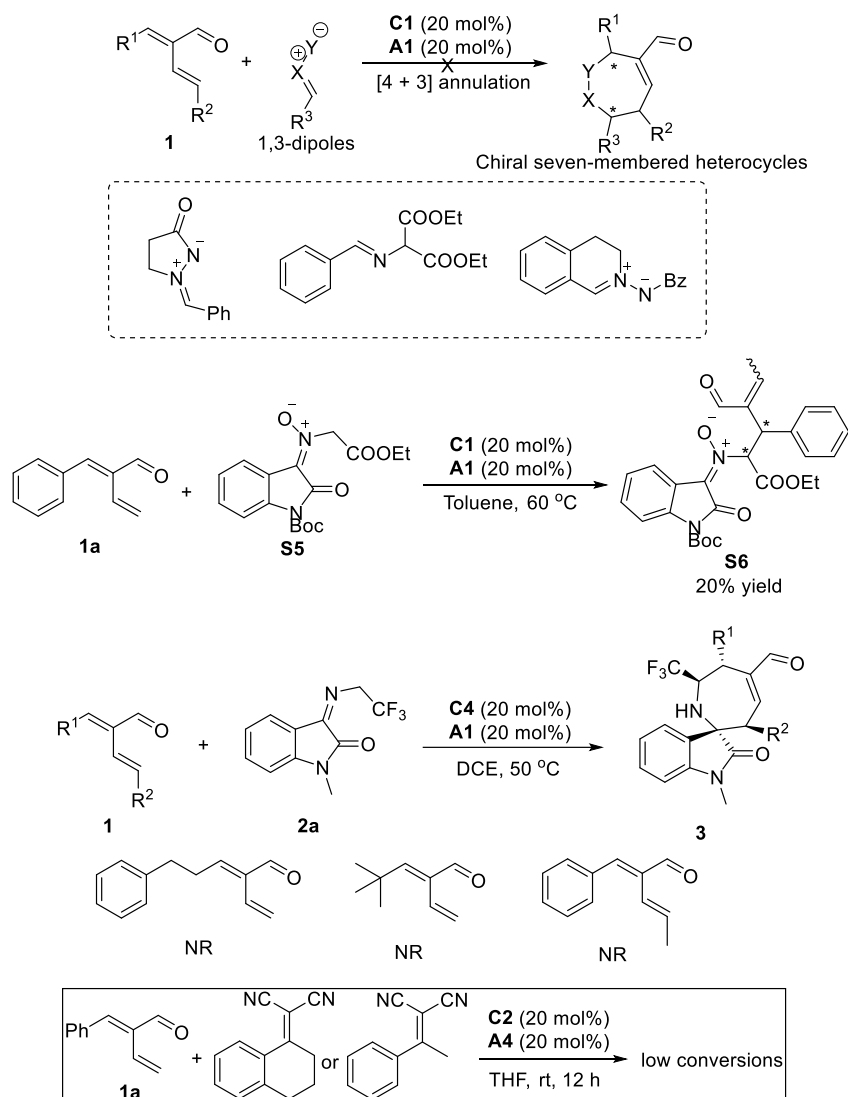

To further expand the utility of this strategy, more 1,3-dipoles were explored in the reactions with  $\alpha$ -vinylenals **1** under similar catalytic conditions. Unfortunately, the 1,3-dipoles outlined in the above scheme did not react with  $\alpha$ -vinylenal **1a** and failed to give the desired [4+3] cycloadducts. Isatin-derived nitron **S5** could react with  $\alpha$ -vinylenal **1a** to give Michael addition product **S6** in a low yield under similar catalytic conditions.

On the other hand, the desired annulation products were not formed by using  $\alpha$ -vinylenals **1** having a  $\gamma$ '-alkyl or  $\beta$ -alkyl group.

In addition, the  $\alpha,\alpha$ -dicyanoalkenes from other ketones, as outlined in the above scheme, also showed low reactivity with enal **1a**.

## 7. Asymmetric reaction on a 1.0 mmol scale

### 7.1 $\beta,\gamma'$ -Regioselective [4+3] annulation of $\alpha$ -vinylenal **1a** with *N*-(2,2,2-trifluoroethyl) ketimine **2a**

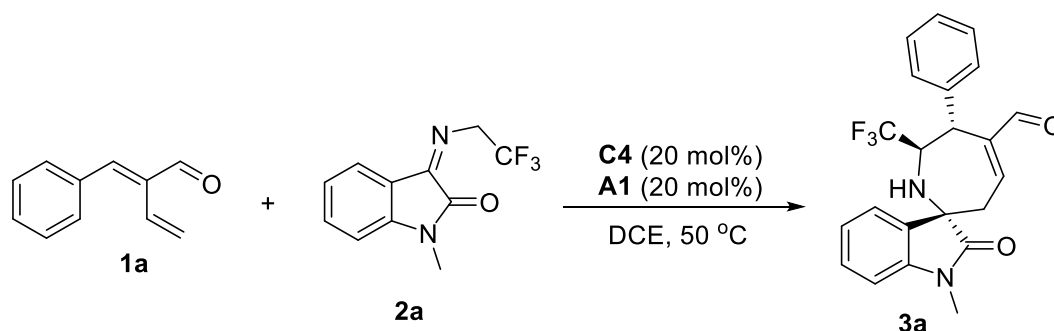

A mixture of (*E*)-2-benzylidenebut-3-enal **1a** (189.6 mg, 1.20 mmol, 1.2 equiv), (*Z*)-1-methyl-3-((2,2,2-trifluoroethyl)imino)indolin-2-one **2a** (242 mg, 1.00 mmol, 1.0 equiv), **C4** (91 mg, 0.200 mmol, 0.2 equiv) and **A1** (24 mg, 0.200 mmol, 0.2 equiv) in DCE (2 mL) was stirred at 50 °C for 12 h, and the reaction was monitored by TLC. After completion, purification by flash chromatography on silica gel (EtOAc/petroleum ether = 1/7) gave the product **3a**: 280.0 mg (0.700 mmol), as a white solid, 70% yield; >19:1 dr; 90% ee.

### 7.2 $\beta,\gamma'$ -Regioselective [4+2] annulation of $\alpha$ -vinylenal **1a** with 2-(thiochroman-4-ylidene)malononitrile **4a**

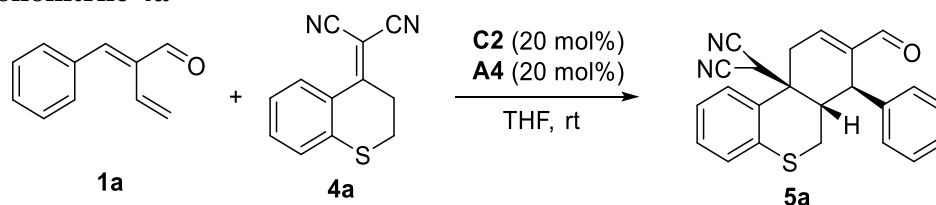

A mixture of (*E*)-2-benzylidenebut-3-enal **1a** (189.6 mg, 1.20 mmol, 1.2 equiv), 2-(thiochroman-4-ylidene)malononitrile **4a** (212 mg, 1.00 mmol, 1.0 equiv), **C2** (47.2 mg, 0.200 mmol, 0.2 equiv) and **A4** (33.4 mg, 0.200 mmol, 0.2 equiv) in THF (2 mL) was stirred at room temperature for 12 h, and the reaction was monitored by TLC. After completion, purification by flash chromatography on silica gel (EtOAc/petroleum ether = 1/7) gave the product **5a**: 321.9 mg (0.870 mmol), as a yellow solid, 87% yield; >19:1 dr; 97% ee.

## 8. Crystal data and structural refinement

### 8.1 Crystal data and structural refinement for enantiopure **3b**

Preparation of the single crystals of enantiopure **3b**: 30.0 mg of compound **3b** (87% ee) was dissolved in  $\text{CHCl}_3$  (1.0 mL) in a 10 mL tube, and *n*-hexane (3.0 mL) was added. The tube was sealed by a piece of weighing paper with several tiny holes, thus allowing slow evaporation of the solvents at room temperature. After 4 days, several small particles could be observed at the bottom of the tube.



The crystals were chosen and subjected to the single crystal X-ray diffraction analysis for the determination of the absolute configuration of **3b**. The data were collected by an Agilent Gemini equipped with a Cu radiation source ( $K\alpha = 1.54184 \text{ \AA}$ ) at 293.9(3) K. CCDC 2036410 (**3b**) contains the supplementary crystallographic data for this paper. These data can be obtained free of charge via [www.ccdc.cam.ac.uk/data\\_request/cif](http://www.ccdc.cam.ac.uk/data_request/cif).

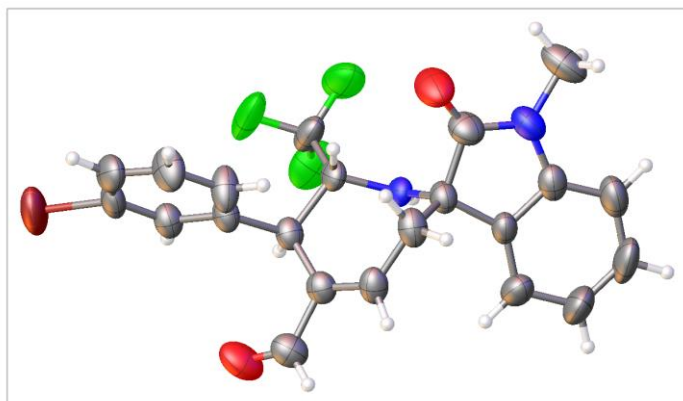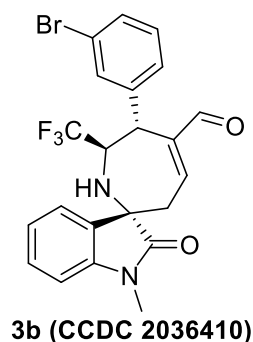

(ellipsoid contour probability 50%)

|                                               |                                                               |
|-----------------------------------------------|---------------------------------------------------------------|
| Identification code                           | <b>3b</b>                                                     |
| Empirical formula                             | $C_{22}H_{18}BrF_3N_2O_2$                                     |
| Formula weight                                | 479.29                                                        |
| Temperature/K                                 | 293.9(3)                                                      |
| Crystal system                                | orthorhombic                                                  |
| Space group                                   | $P2_12_12_1$                                                  |
| $a/\text{\AA}$                                | 6.2936(3)                                                     |
| $b/\text{\AA}$                                | 14.1248(7)                                                    |
| $c/\text{\AA}$                                | 23.2960(9)                                                    |
| $\alpha/^\circ$                               | 90                                                            |
| $\beta/^\circ$                                | 90                                                            |
| $\gamma/^\circ$                               | 90                                                            |
| Volume/ $\text{\AA}^3$                        | 2070.91(17)                                                   |
| Z                                             | 4                                                             |
| $\rho_{\text{calc}}/\text{cm}^3$              | 1.537                                                         |
| $\mu/\text{mm}^{-1}$                          | 3.136                                                         |
| F(000)                                        | 968.0                                                         |
| Crystal size/ $\text{mm}^3$                   | $0.5 \times 0.3 \times 0.3$                                   |
| Radiation                                     | $\text{CuK}\alpha$ ( $\lambda = 1.54184$ )                    |
| $2\theta$ range for data collection/ $^\circ$ | 7.32 to 142.742                                               |
| Index ranges                                  | $-7 \leq h \leq 3, -15 \leq k \leq 17, -22 \leq l \leq 28$    |
| Reflections collected                         | 9369                                                          |
| Independent reflections                       | 3888 [ $R_{\text{int}} = 0.0434, R_{\text{sigma}} = 0.0437$ ] |
| Data/restraints/parameters                    | 3888/0/272                                                    |
| Goodness-of-fit on $F^2$                      | 1.056                                                         |

|                                                |                                  |
|------------------------------------------------|----------------------------------|
| Final R indexes [ $I \geq 2\sigma(I)$ ]        | $R_1 = 0.0634$ , $wR_2 = 0.1675$ |
| Final R indexes [all data]                     | $R_1 = 0.0674$ , $wR_2 = 0.1749$ |
| Largest diff. peak/hole / $e \text{ \AA}^{-3}$ | 0.58/-0.52                       |
| Flack parameter                                | 0.001(18)                        |

## 8.2 Crystal data and structural refinement for enantiopure **5g**

Preparation of the single crystals of enantiopure **5g**: 30.0 mg of compound **5g** (93% ee) was dissolved in THF (1.0 mL) in a 10 mL tube and *n*-hexane (3.0 mL) was added. The tube was sealed by a piece of weighing paper with several tiny holes, thus allowing slow evaporation of the solvents at room temperature. After 24 h, several small particles could be observed at the bottom of the tube. The crystals were chosen and subjected to the single crystal X-ray diffraction analysis for the determination of the absolute configuration of **5g**. The data were collected by an Agilent Gemini equipped with a Cu radiation source ( $K\alpha = 1.54184 \text{ \AA}$ ) at 295.1(4) K. CCDC 2036411 (**5g**) contains the supplementary crystallographic data for this paper. These data can be obtained free of charge via [www.ccdc.cam.ac.uk/data\\_request/cif](http://www.ccdc.cam.ac.uk/data_request/cif).

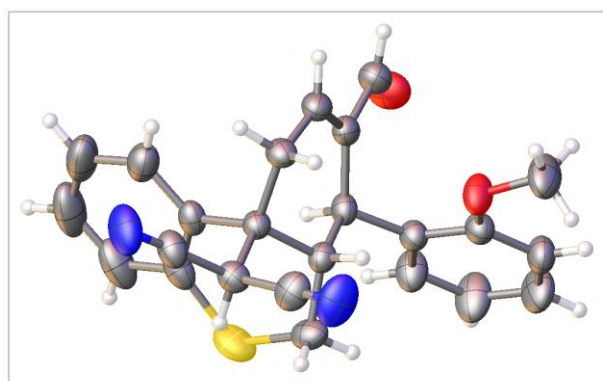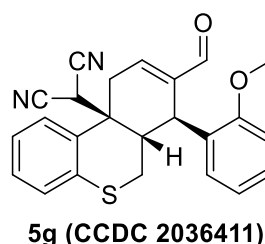

(ellipsoid contour probability 50%)

|                                  |                       |
|----------------------------------|-----------------------|
| Identification code              | <b>5g</b>             |
| Empirical formula                | $C_{24}H_{20}N_2O_2S$ |
| Formula weight                   | 400.48                |
| Temperature/K                    | 295.1(4)              |
| Crystal system                   | monoclinic            |
| Space group                      | $P2_1$                |
| $a/\text{\AA}$                   | 8.1897(3)             |
| $b/\text{\AA}$                   | 12.2546(5)            |
| $c/\text{\AA}$                   | 10.5538(4)            |
| $\alpha/^\circ$                  | 90                    |
| $\beta/^\circ$                   | 90.193(3)             |
| $\gamma/^\circ$                  | 90                    |
| Volume/ $\text{\AA}^3$           | 1059.19(7)            |
| Z                                | 2                     |
| $\rho_{\text{calc}}/\text{cm}^3$ | 1.256                 |

|                                                |                                                               |
|------------------------------------------------|---------------------------------------------------------------|
| $\mu/\text{mm}^{-1}$                           | 1.528                                                         |
| F(000)                                         | 420.0                                                         |
| Crystal size/ $\text{mm}^3$                    | $0.4 \times 0.2 \times 0.1$                                   |
| Radiation                                      | $\text{CuK}\alpha$ ( $\lambda = 1.54184$ )                    |
| $2\Theta$ range for data collection/ $^\circ$  | 8.378 to 142.924                                              |
| Index ranges                                   | $-10 \leq h \leq 10, -11 \leq k \leq 15, -12 \leq l \leq 12$  |
| Reflections collected                          | 11399                                                         |
| Independent reflections                        | 3390 [ $R_{\text{int}} = 0.0484, R_{\text{sigma}} = 0.0376$ ] |
| Data/restraints/parameters                     | 3390/1/263                                                    |
| Goodness-of-fit on $F^2$                       | 1.033                                                         |
| Final R indexes [ $I \geq 2\sigma(I)$ ]        | $R_1 = 0.0492, wR_2 = 0.1245$                                 |
| Final R indexes [all data]                     | $R_1 = 0.0531, wR_2 = 0.1319$                                 |
| Largest diff. peak/hole / $e \text{ \AA}^{-3}$ | 0.23/-0.47                                                    |
| Flack parameter                                | -0.010(14)                                                    |

## 9. Proposed catalytic cycle via cascade iminium ion-dienamine catalysis

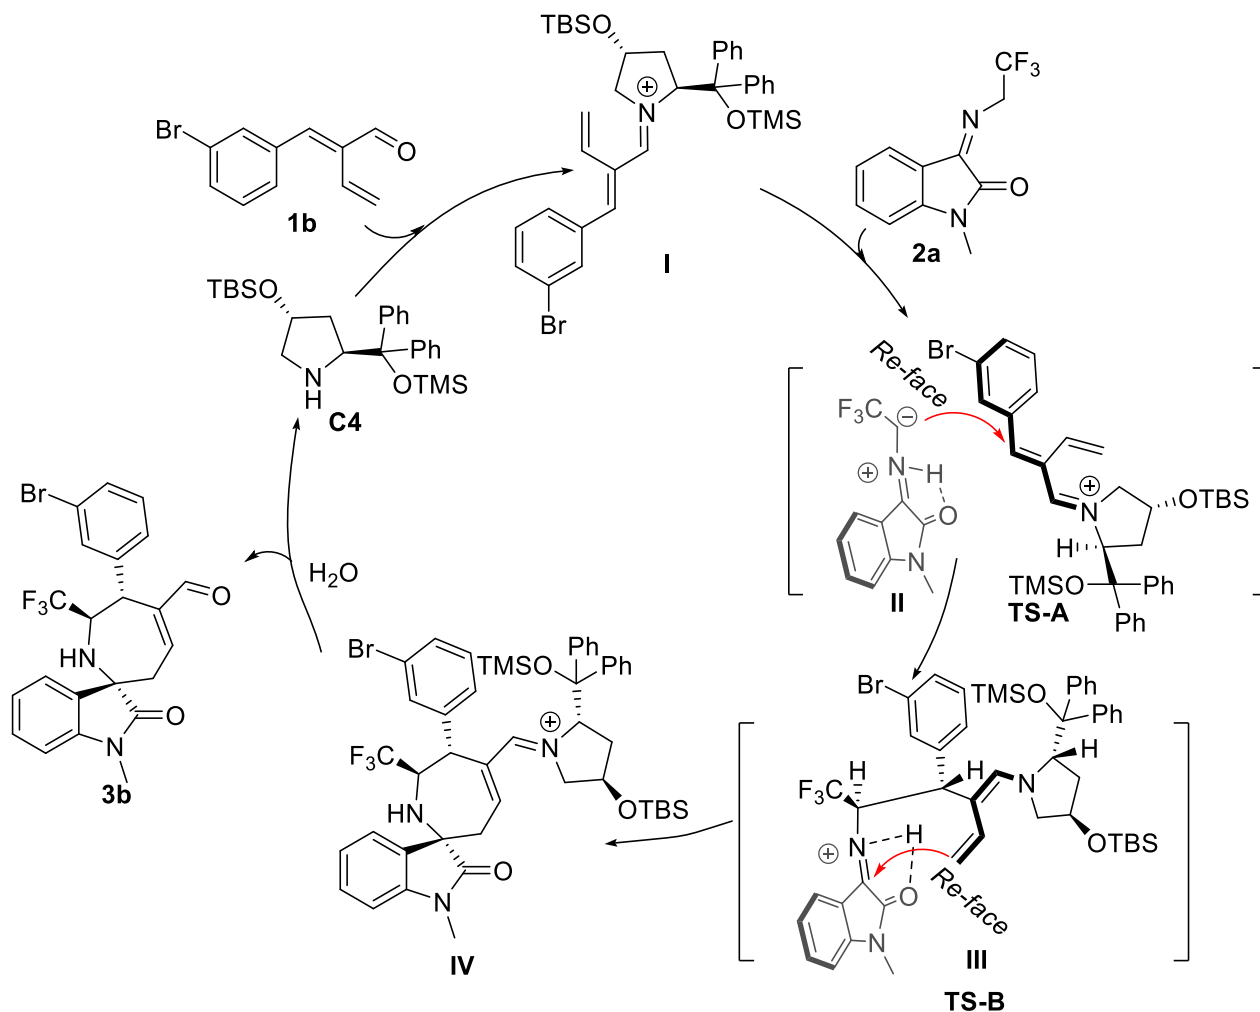

## References

- (1) L. Caruana, F. Kniep, T. K. Johansen, P. H. Poulsen and K. A. Jørgensen, *J. Am. Chem. Soc.*, 2014, **136**, 15929.
- (2) M.-X. Ma, Y.-Y. Zhu, Q.-T. Sun, X.-Y. Li, J.-H. Su, L. Zhao, Y.-Y. Zhao, S. Qiu, W.-J. Yan, K.-R. Wang and R. Wang, *Chem. Commun.*, 2015, **51**, 8789.
- (3) S. Kobayashi, K. Kudo, A. Ito, T. Honjo, M. Yata, T. Otani, N. Kutsumura, T. Saito, F. Berré, E. Romain, F. Tripoteau and B. Carboni, *Eur. J. Org. Chem.*, 2015, 4367.
- (4) (a) X.-Y. Li, X.-Y. Xu, W.-W. Wei, A.-J. Lin and H.-Q. Yao, *Org. Lett.*, 2016, **18**, 428; (b) D. Xue, Y.-C. Chen, X. Cui, Q.-W. Wang, J. Zhu and J.-G. Deng, *J. Org. Chem.*, 2005, **70**, 3584.
- (5) R.-W. Sun, W. Song, C.-M. Ma, H.-W. Zhang and X.-H. Yu, *Adv. Synth. Catal.*, 2016, **358**, 3977.

## 10. NMR, HRMS spectra and HPLC chromatograms

7.514  
7.497  
7.427  
7.395  
7.375  
7.182  
6.605  
6.559  
6.529  
6.176  
6.132  
6.127  
5.574  
5.565

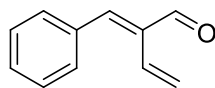

**1a**

<sup>1</sup>H-NMR (400MHz, CDCl<sub>3</sub>)

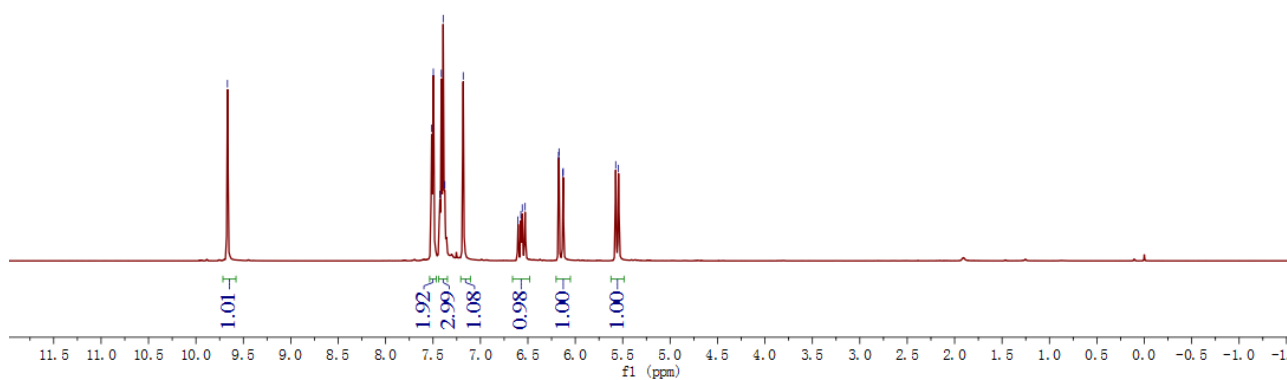

193.870  
140.781  
136.502  
134.685  
130.371  
129.985  
127.737  
122.560

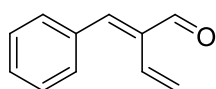

**1a**

<sup>13</sup>C-NMR (100MHz, CDCl<sub>3</sub>)

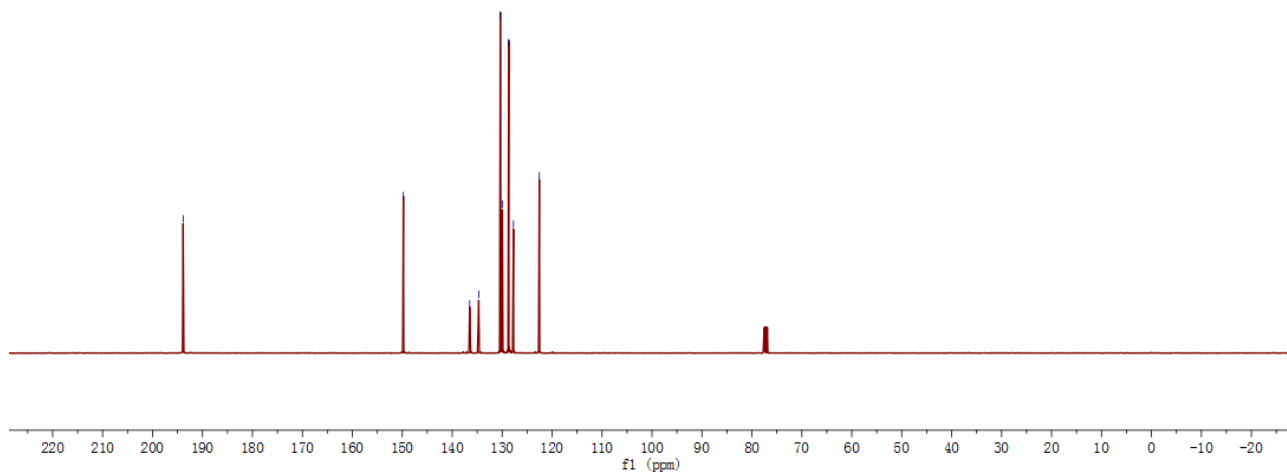

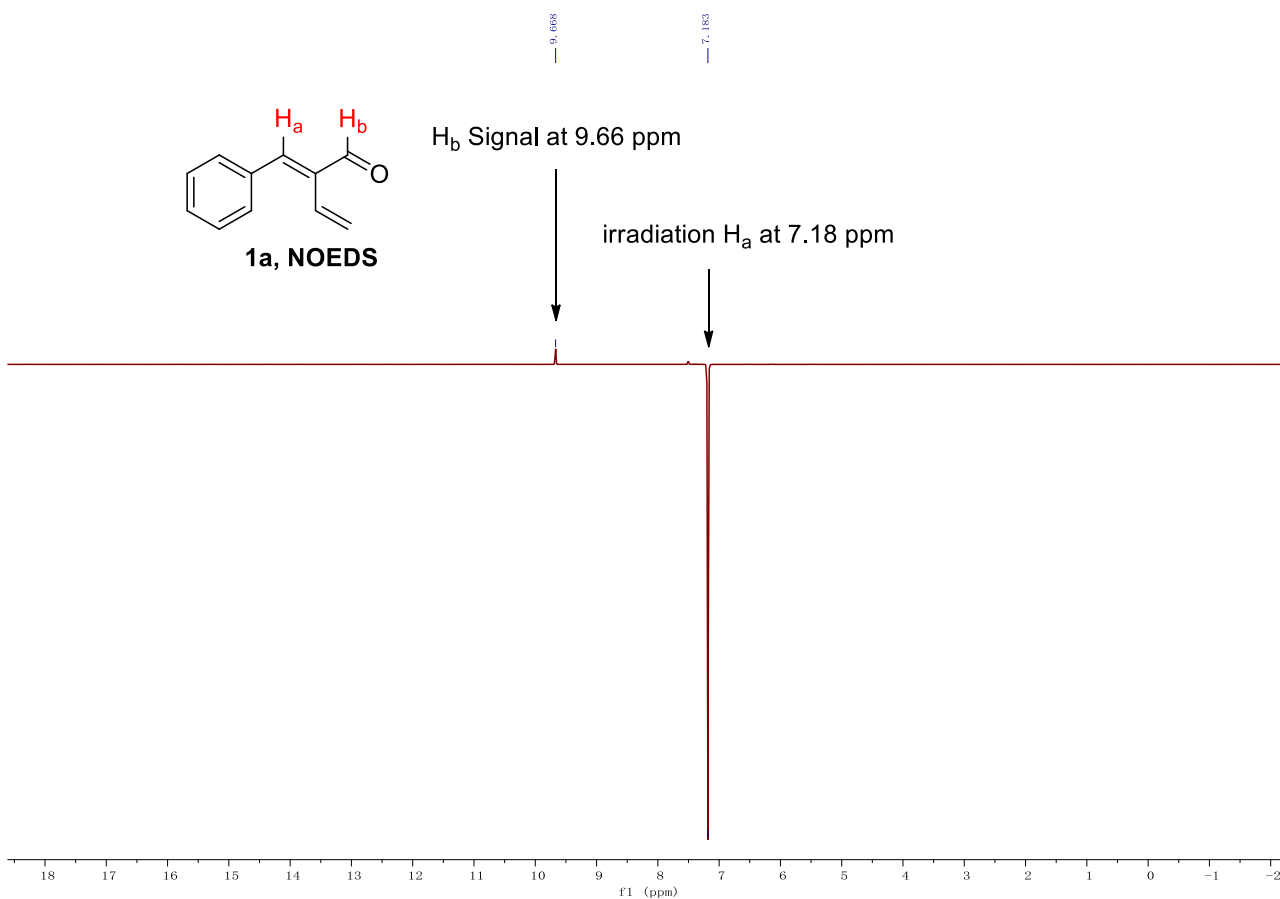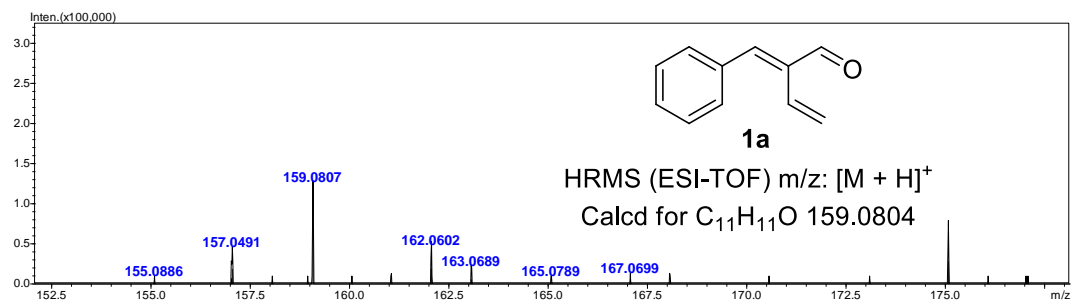

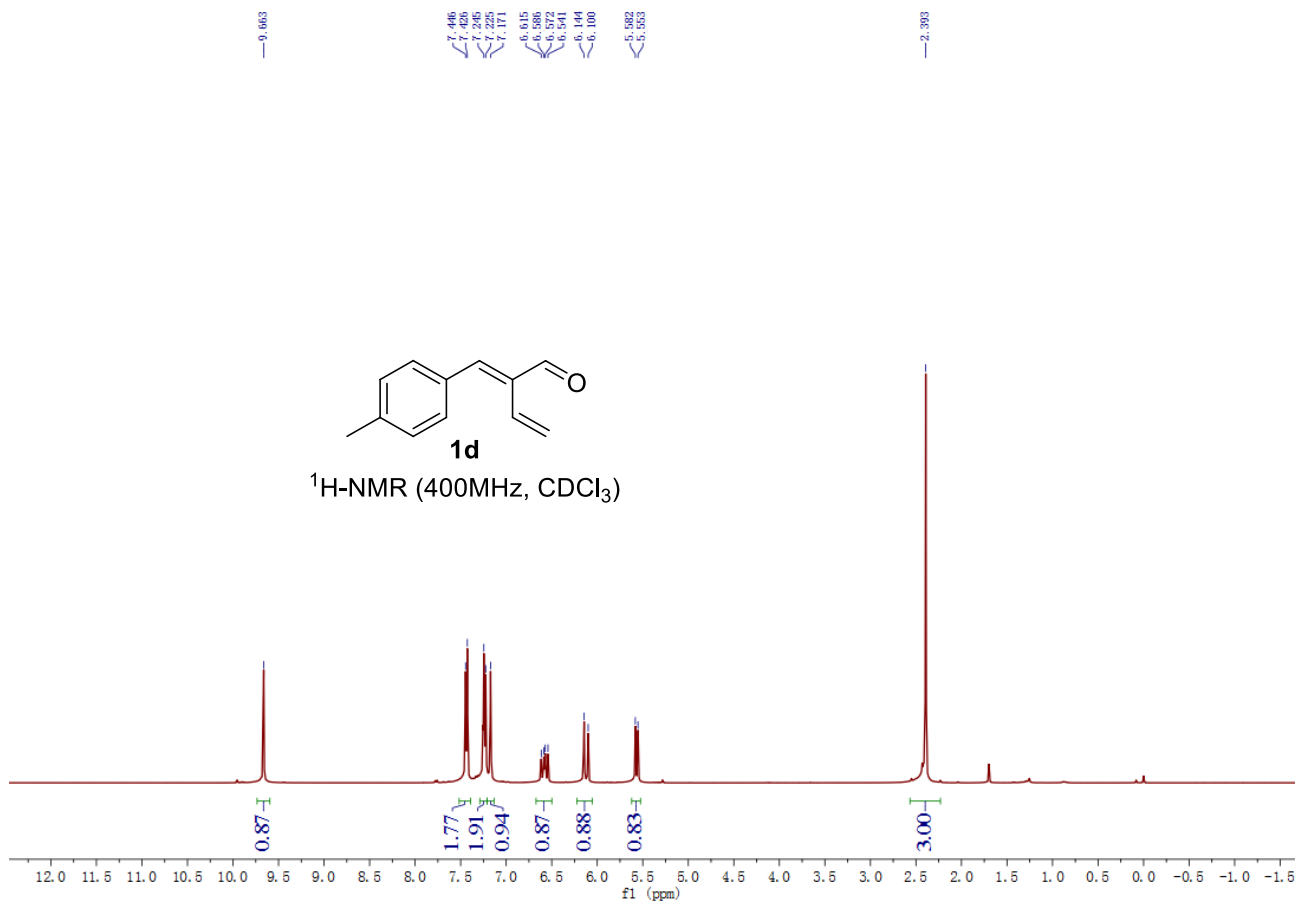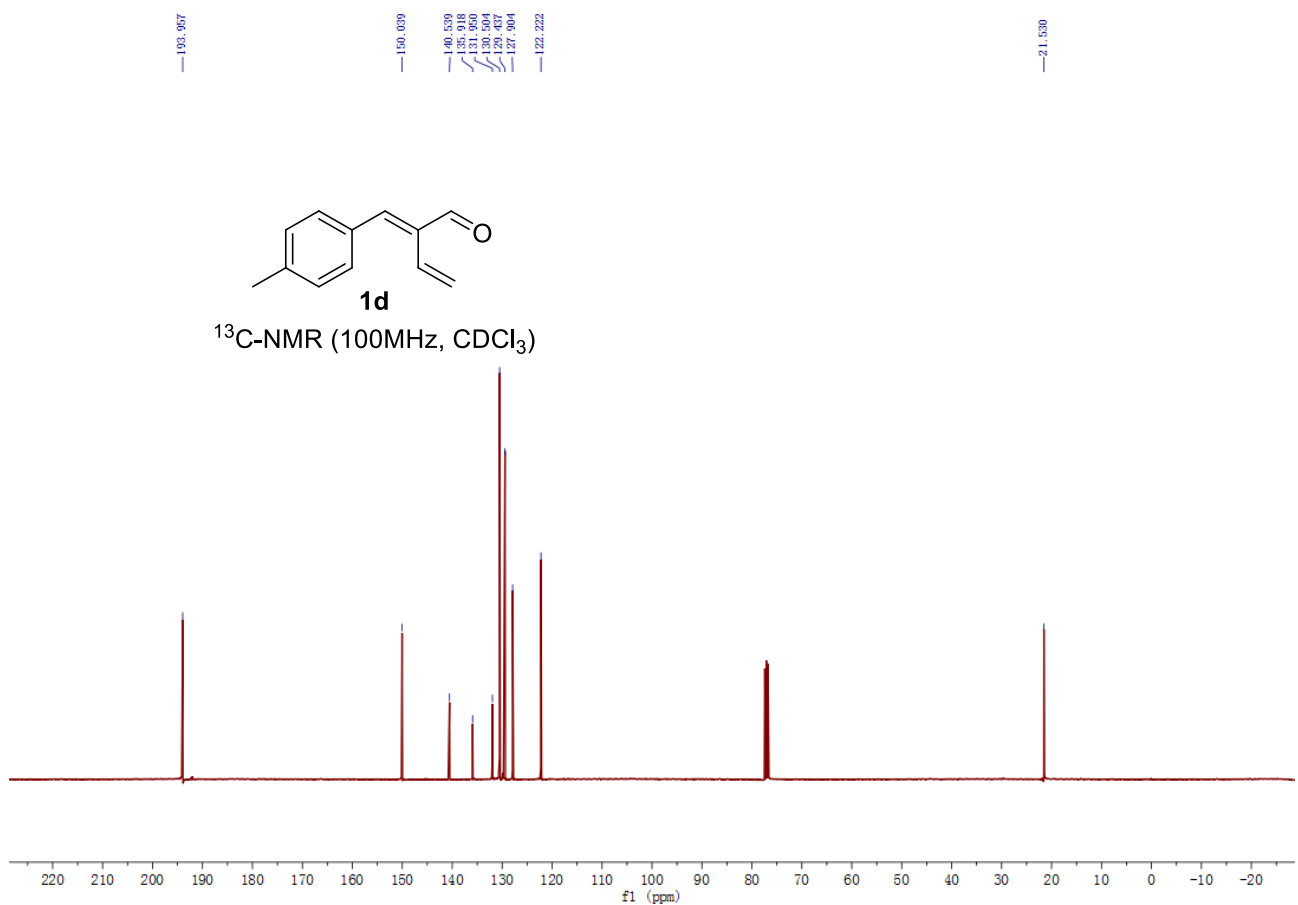

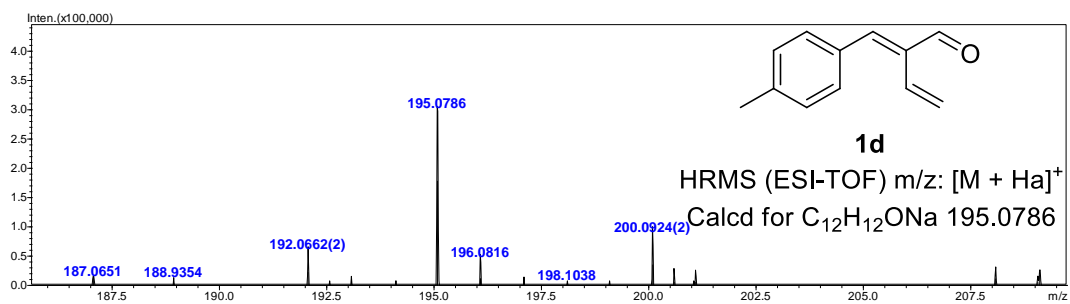



9.614  
7.607  
7.595  
7.583  
7.503  
7.161  
7.140  
6.788  
6.746  
6.737  
6.700  
6.126  
5.854  
5.846

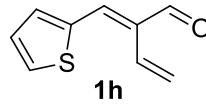

<sup>1</sup>H-NMR (400MHz, CDCl<sub>3</sub>)

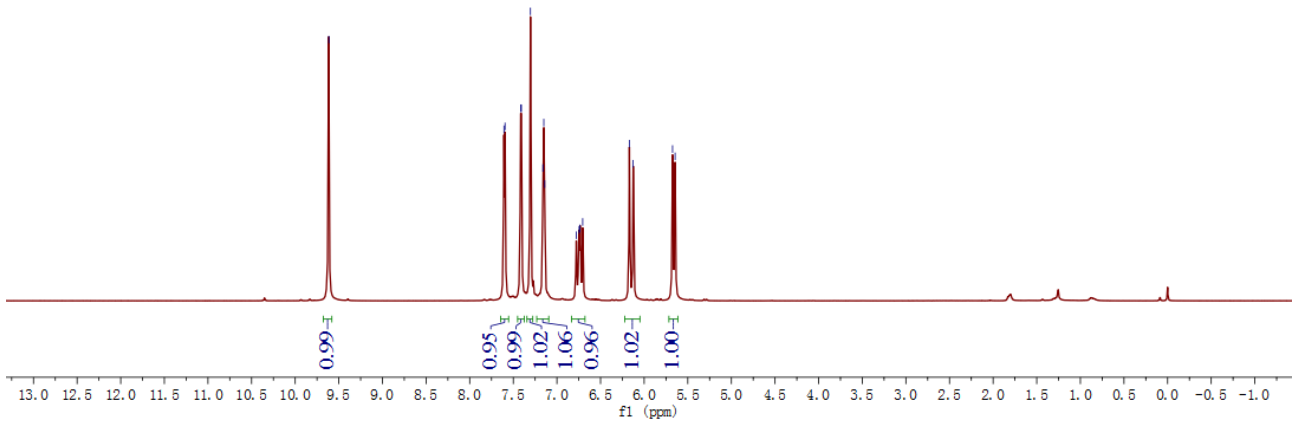

193.270  
141.506  
139.324  
139.324  
133.881  
132.403  
127.222  
127.222  
123.512

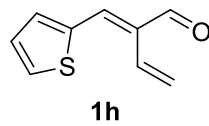

<sup>13</sup>C-NMR (100MHz, CDCl<sub>3</sub>)

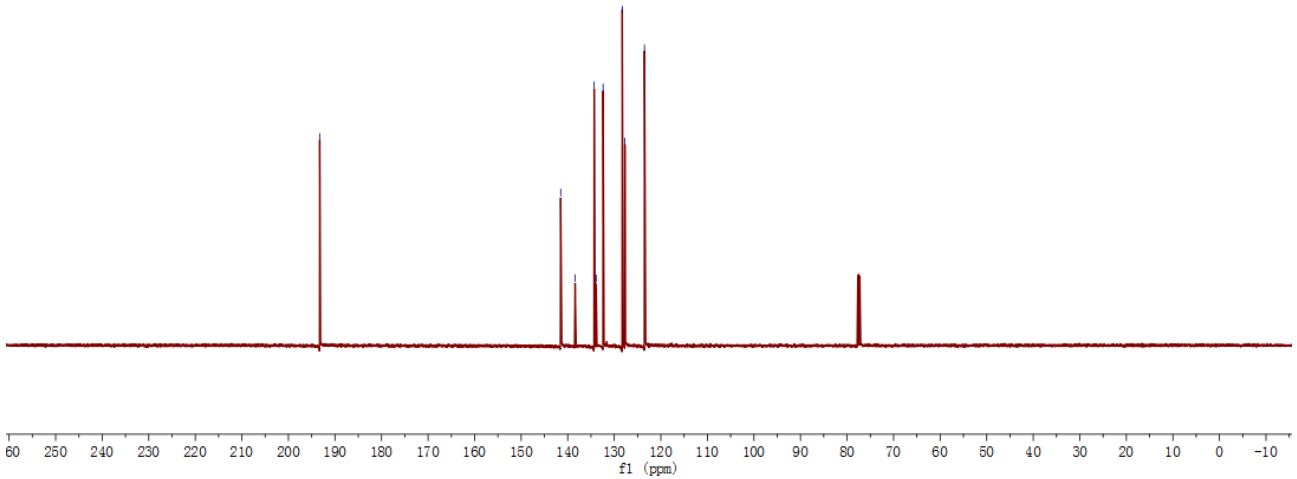

# Spectrum Plot Report

|                |                   |              |       |            |              |                   |                                     |
|----------------|-------------------|--------------|-------|------------|--------------|-------------------|-------------------------------------|
| Name           | CYC-20200105-41   | Rack Pos.    |       | Instrument | Instrument 1 | Operator          |                                     |
| Inj. Vol. (ul) | 10                | Plate Pos.   |       | IRM Status | Success      |                   |                                     |
| Data File      | CYC-20200105-41.d | Method (Acq) | TOF.m | Comment    |              | Acq. Time (Local) | 1/10/2020 8:39:47 PM<br>(UTC+08:00) |

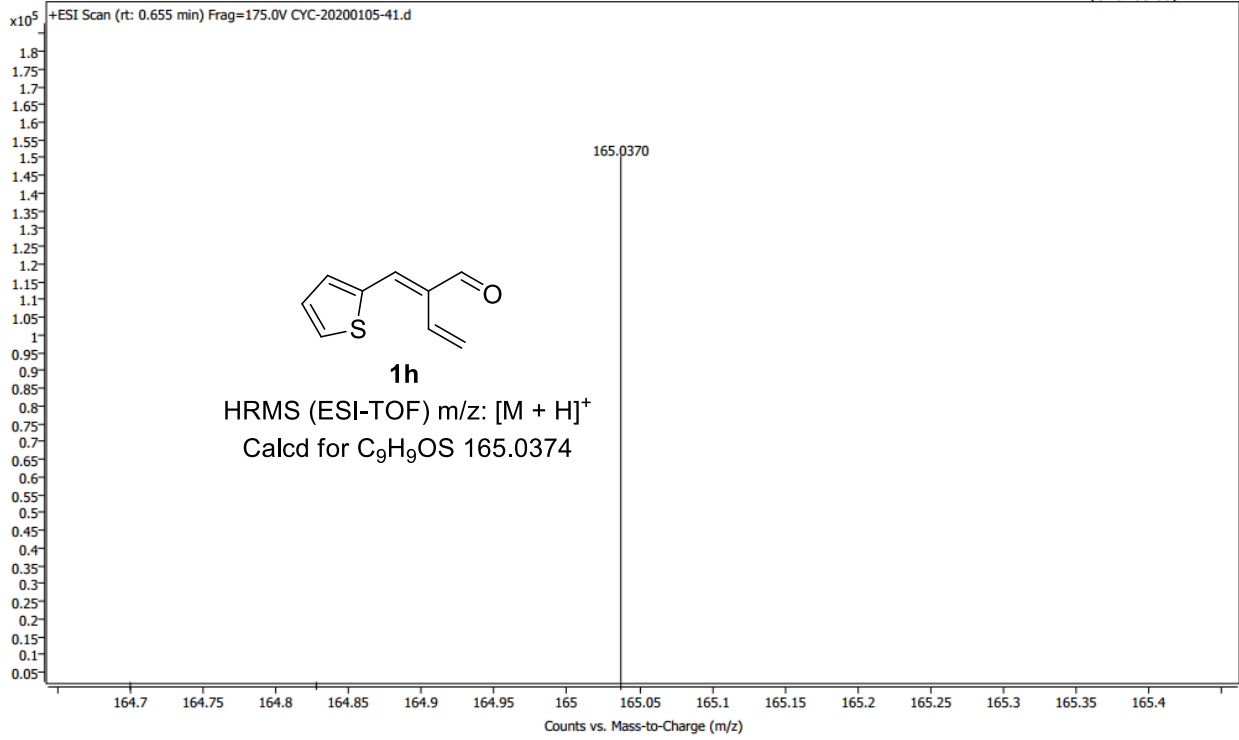

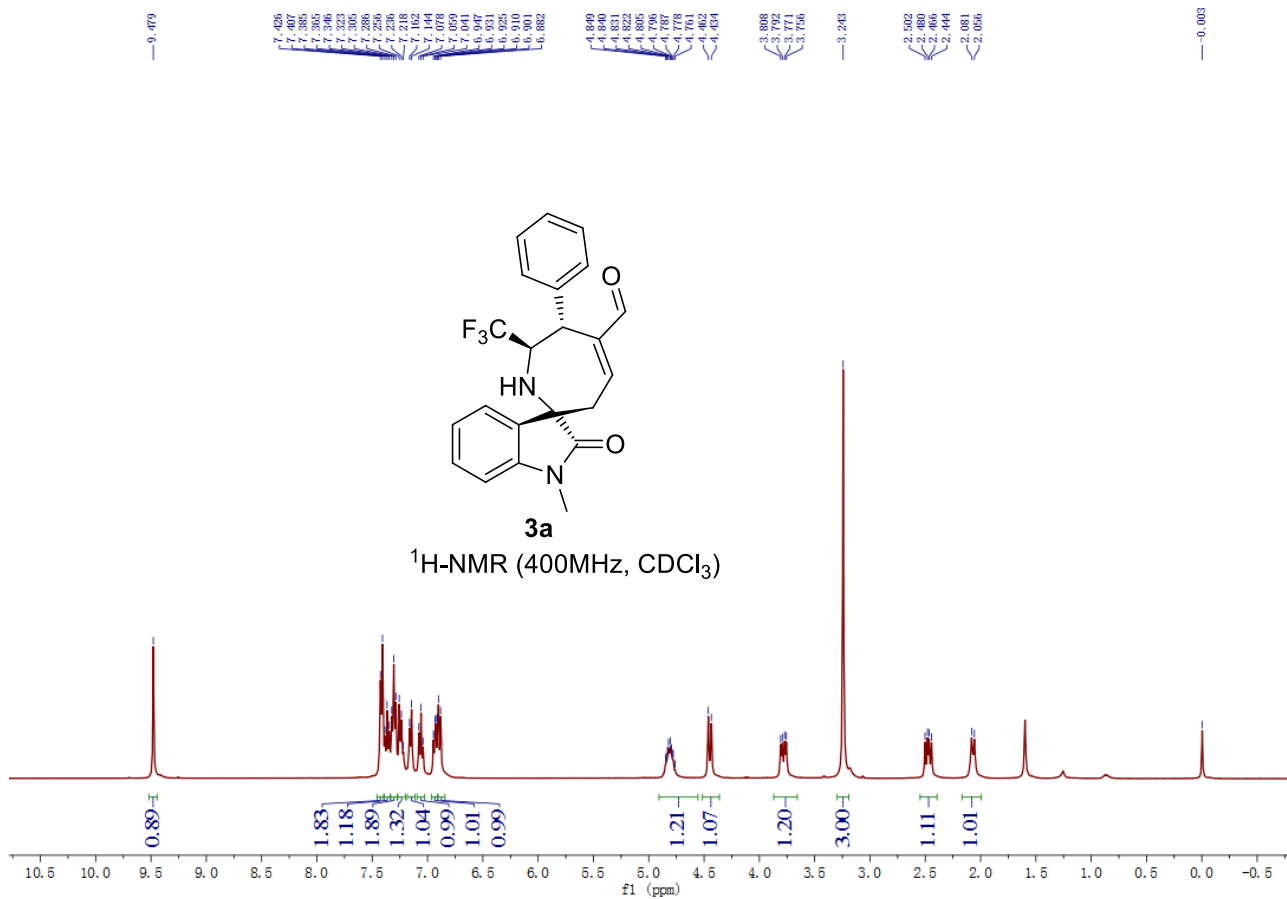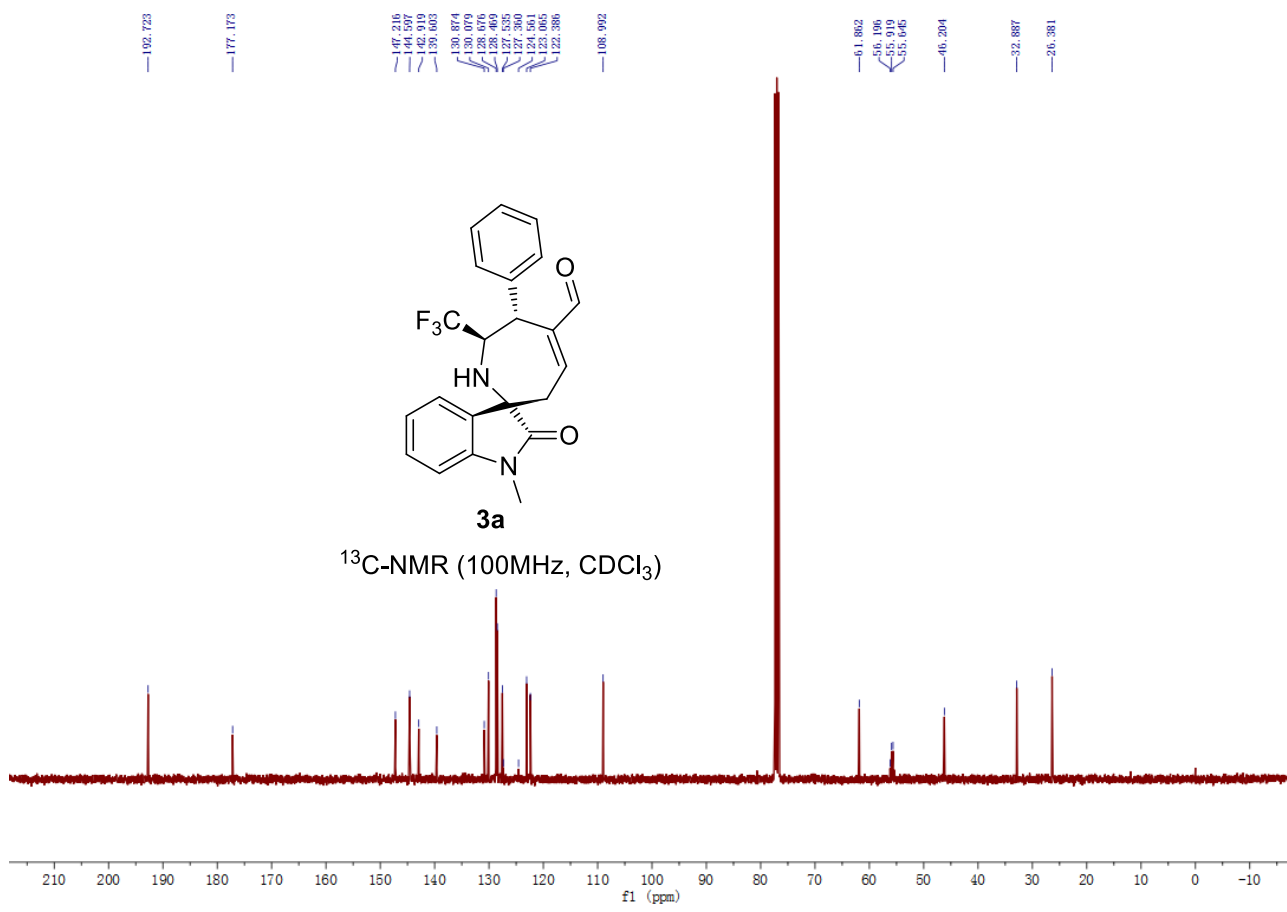

-74.026

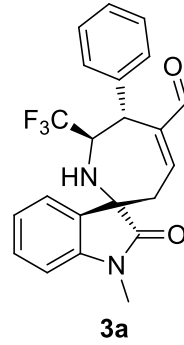

$^{19}\text{F}$ -NMR (376MHz,  $\text{CDCl}_3$ )

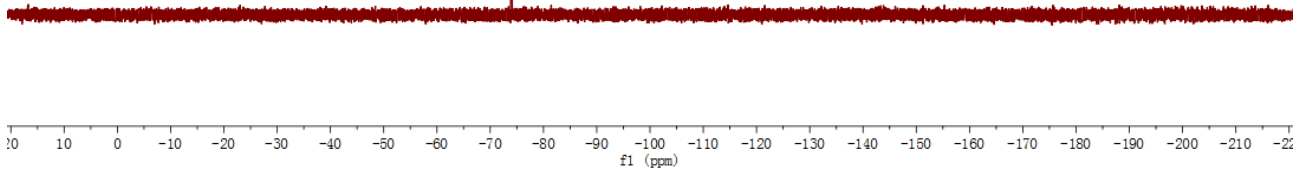

GY-542 105 (1.207)

1: TOF MS ES+  
4.23e4

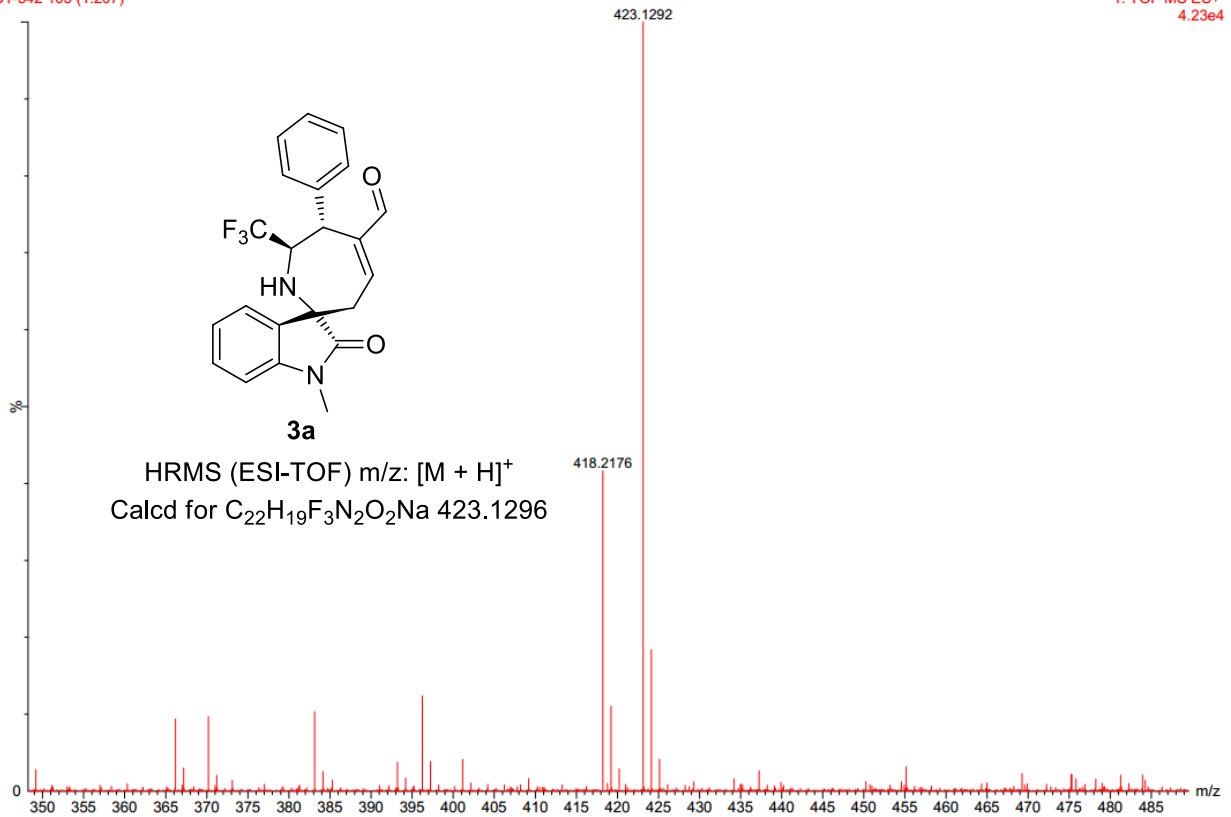

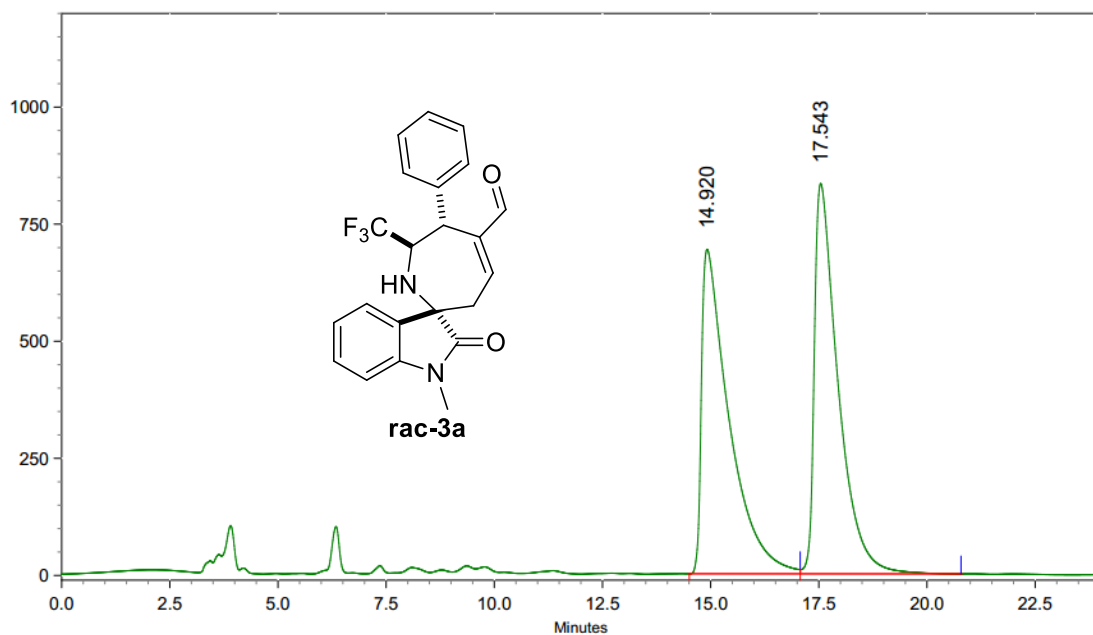

### AREA PERCENT REPORT

| Peak No. | Ret Time | Width | Height   | Area      | Area [%] |
|----------|----------|-------|----------|-----------|----------|
| 1        | 14.920   | 2.563 | 11622156 | 514131367 | 49.1405  |
| 2        | 17.543   | 3.717 | 13978743 | 532115617 | 50.8595  |

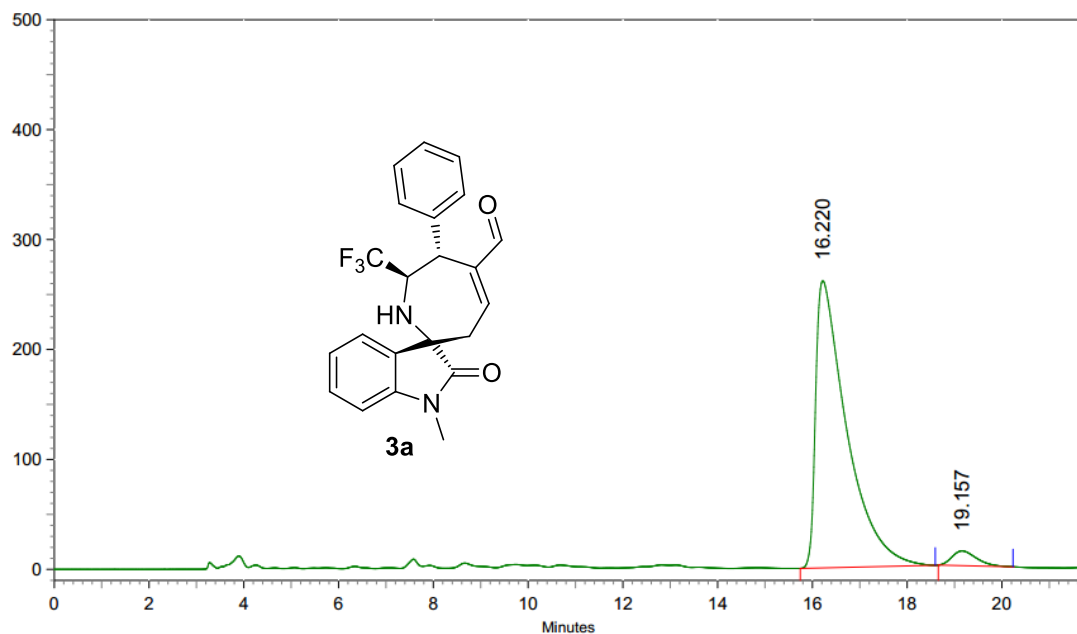

### AREA PERCENT REPORT

| Peak No. | Ret Time | Width | Height  | Area      | Area [%] |
|----------|----------|-------|---------|-----------|----------|
| 1        | 16.220   | 2.850 | 4383154 | 199090561 | 96.1076  |
| 2        | 19.157   | 1.577 | 224393  | 8063292   | 3.8924   |

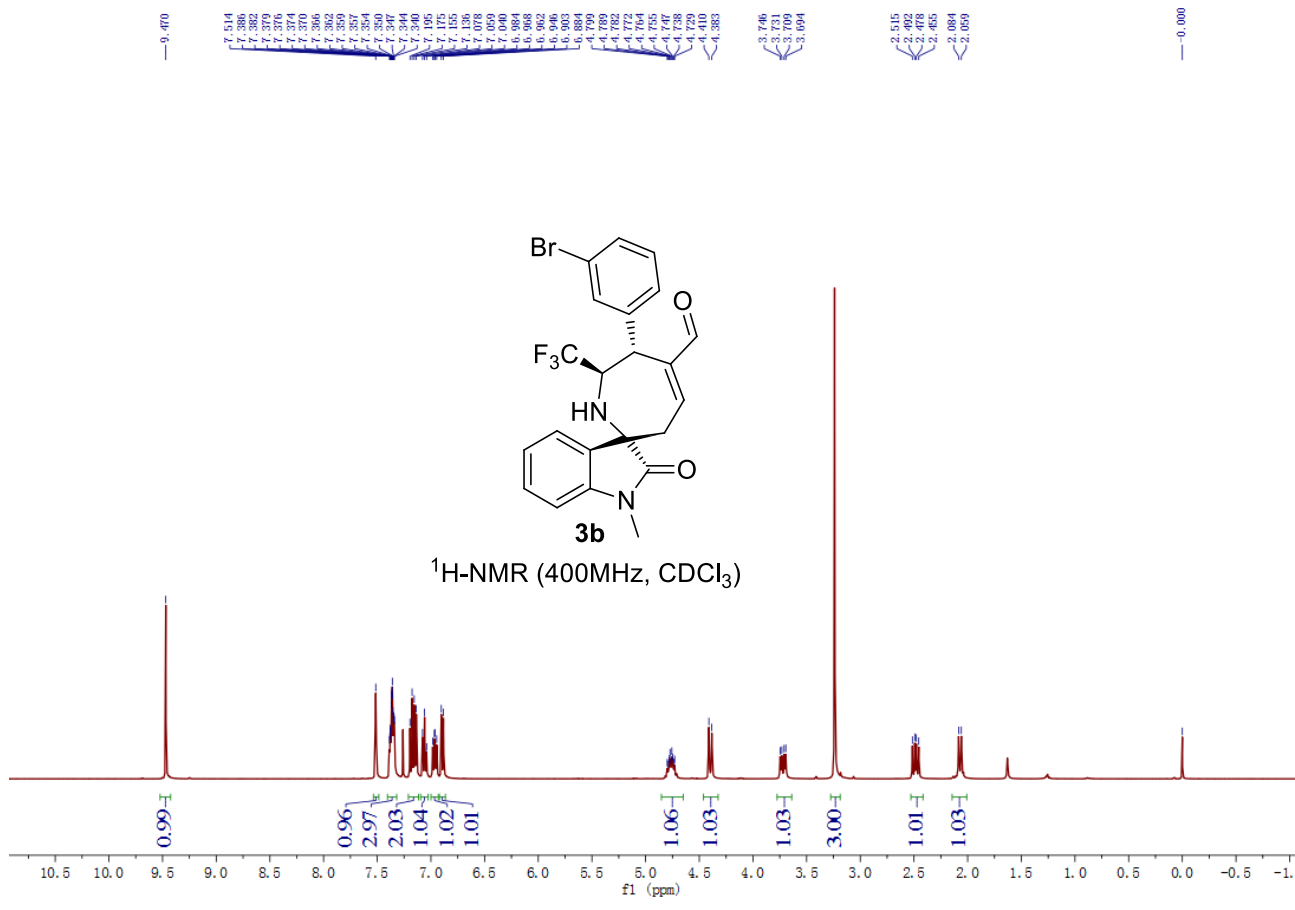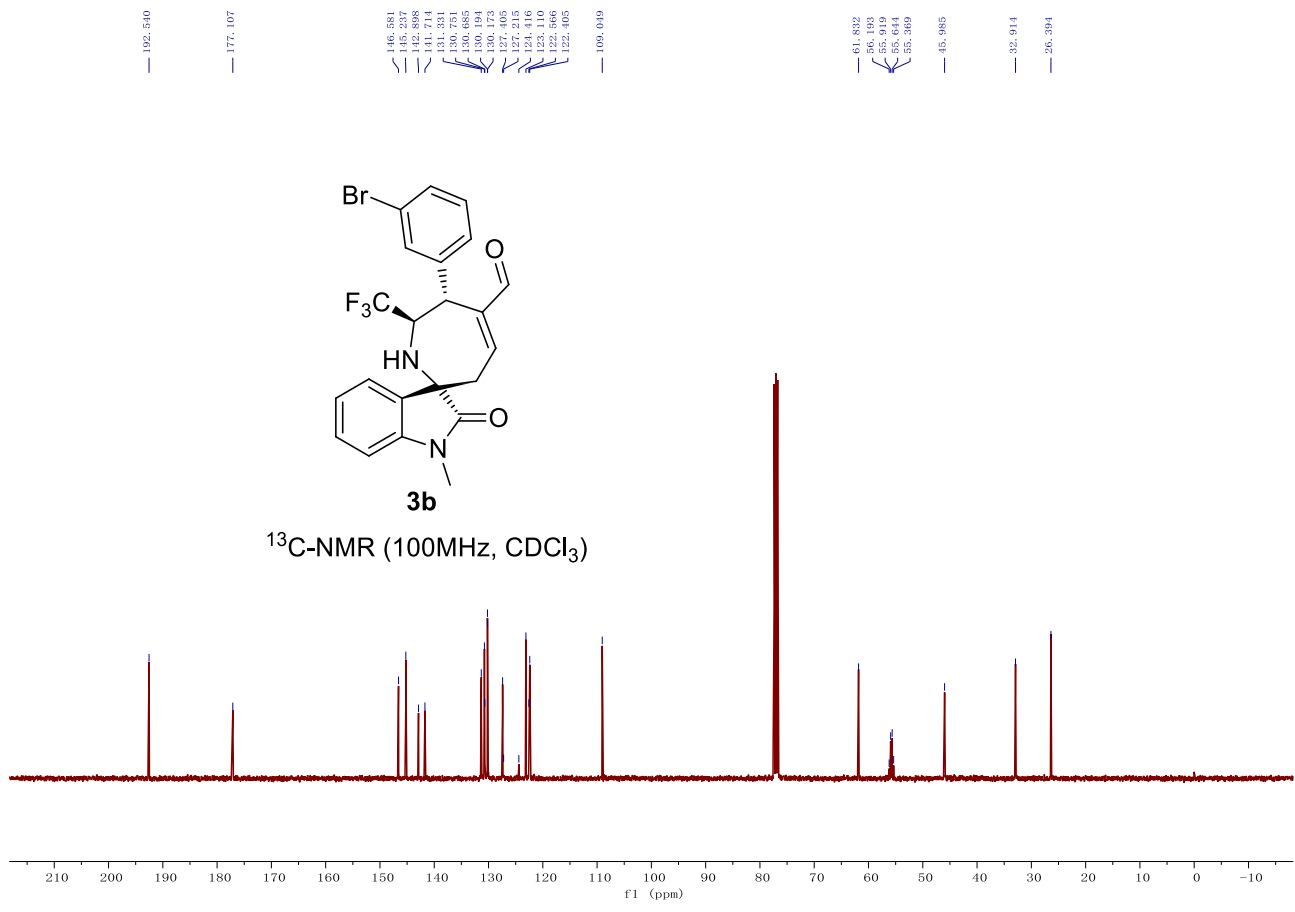

-73.852

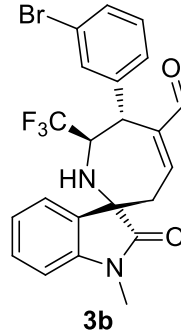

**3b**  
 $^{19}\text{F}$ -NMR (376MHz,  $\text{CDCl}_3$ )

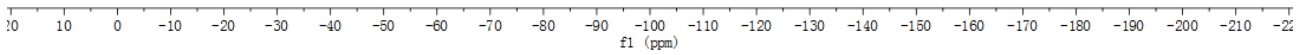

200117\_GY\_SS\_25 14 (0.239) Cm (3.24)

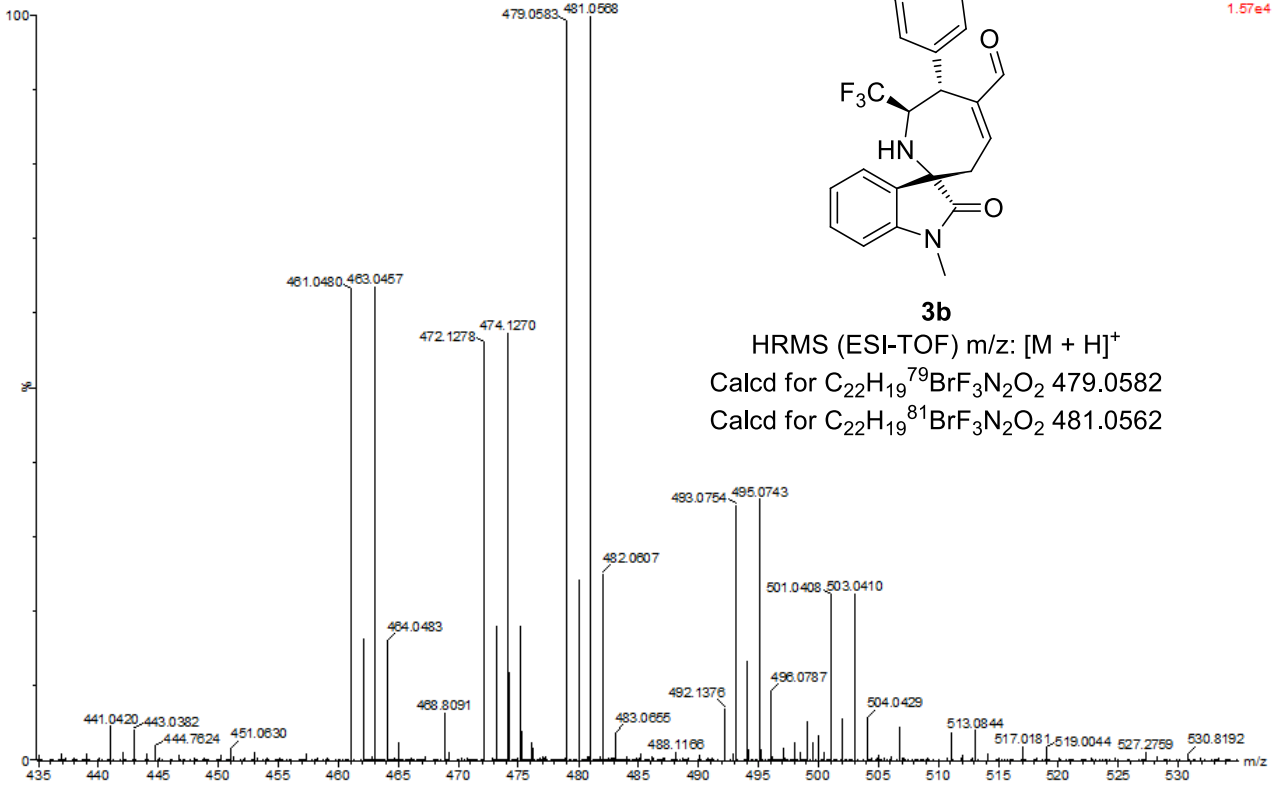

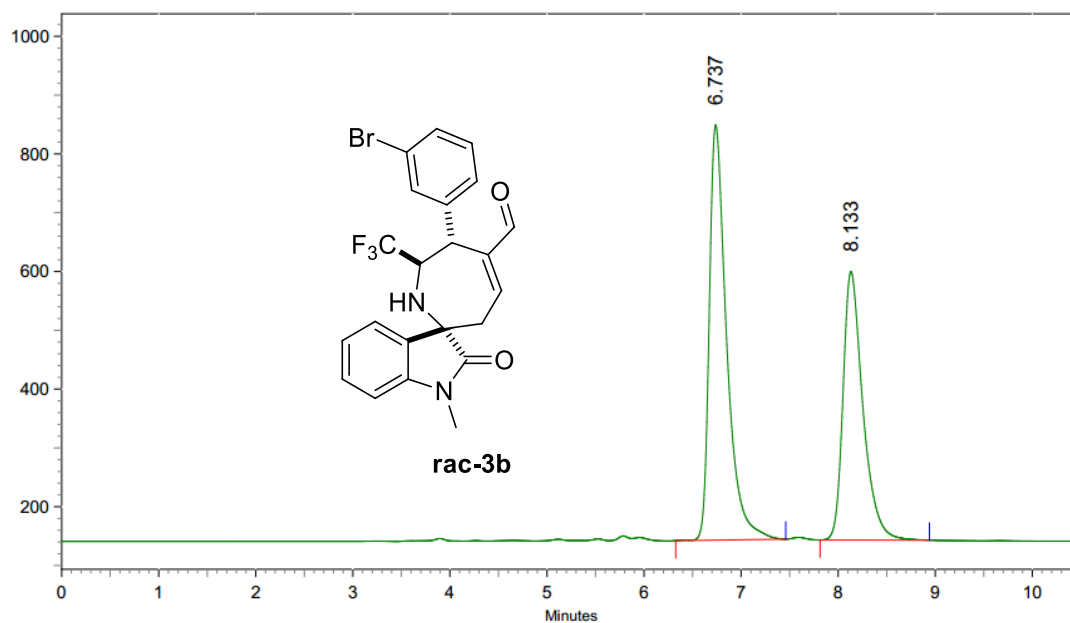

### AREA PERCENT REPORT

| Peak No. | Ret Time | Width | Height   | Area      | Area [%] |
|----------|----------|-------|----------|-----------|----------|
| 1        | 6.737    | 1.133 | 11848156 | 147141819 | 57.4872  |
| 2        | 8.133    | 1.127 | 7659915  | 108814018 | 42.5128  |

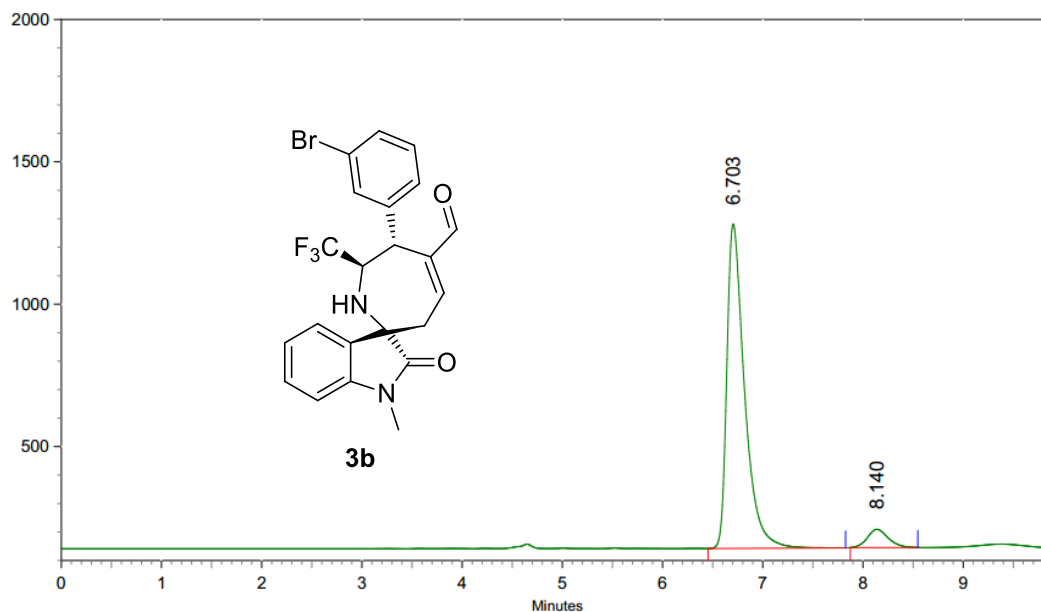

### AREA PERCENT REPORT

| Peak No. | Ret Time | Width | Height   | Area      | Area [%] |
|----------|----------|-------|----------|-----------|----------|
| 1        | 6.703    | 1.373 | 19103979 | 234131608 | 93.7380  |
| 2        | 8.140    | 0.673 | 1079181  | 15640819  | 6.2620   |



8.755

6.860  
6.839  
6.729  
6.720  
6.694  
6.678  
6.670  
6.649  
6.464  
6.457  
6.441  
6.428  
6.388

3.898  
3.890  
3.880  
3.871  
3.858  
3.852  
3.845  
3.833  
3.826  
3.661  
3.633  
3.491  
2.932  
2.917  
2.895  
2.886

1.846  
1.797  
1.774  
1.759  
1.737

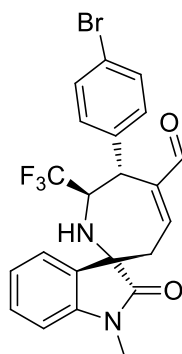

**3c**

<sup>1</sup>H-NMR (400MHz, DMSO)

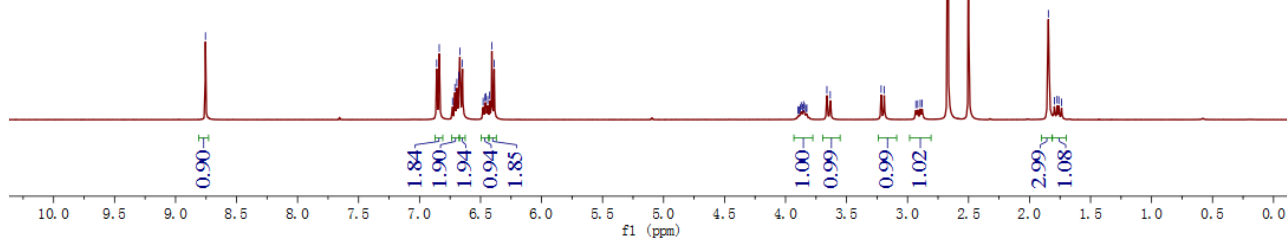

194.297

177.393

146.687  
146.466  
142.919  
140.500  
131.833  
131.094  
129.863  
128.203  
127.863  
124.403  
122.687  
120.564

109.225

79.650

62.446

56.319  
56.051

45.494

32.824

26.462

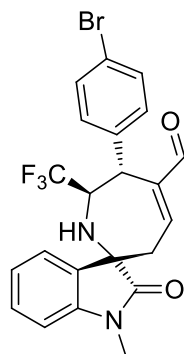

**3c**

<sup>13</sup>C-NMR (100MHz, DMSO)

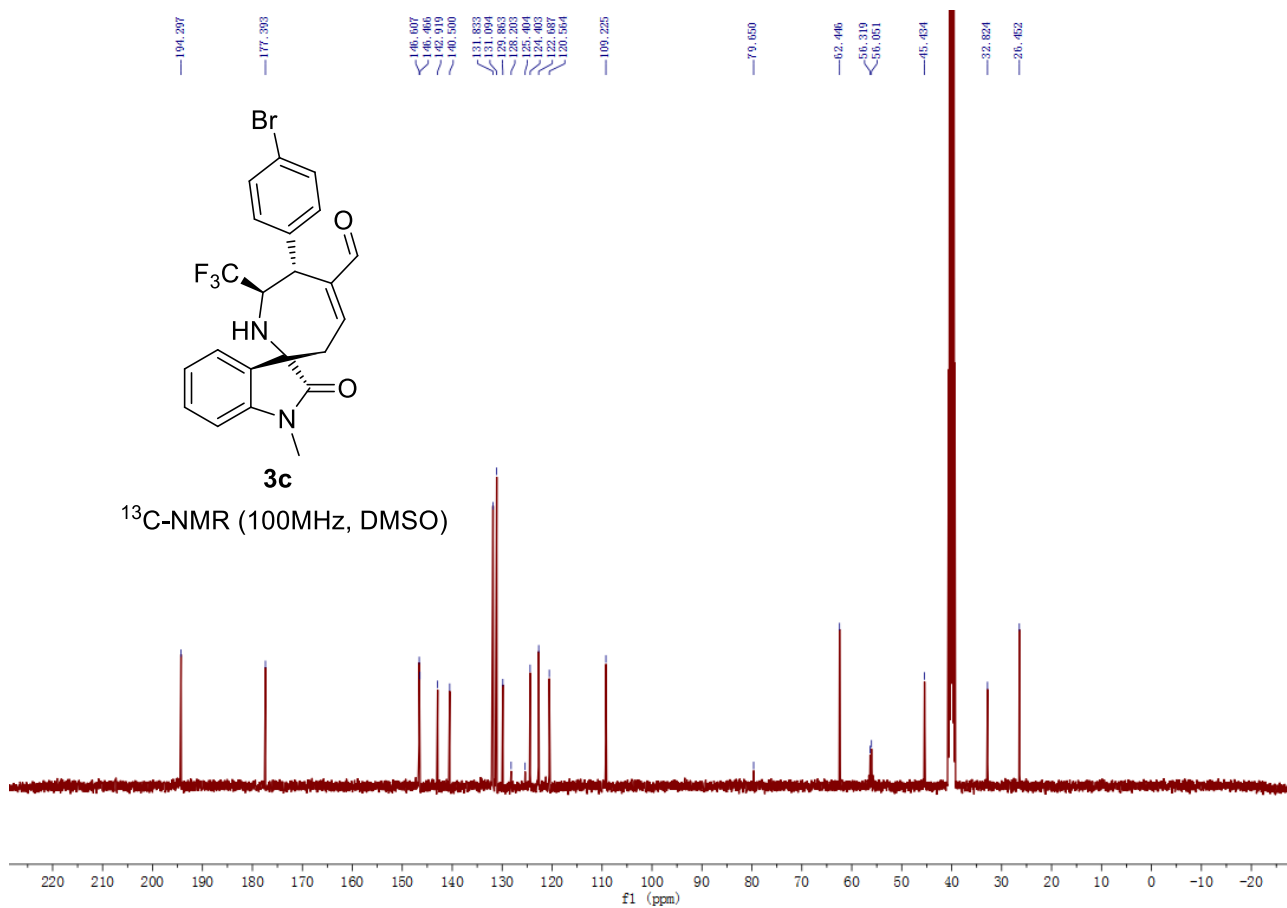

016.8488

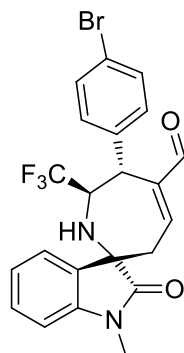

**3c**

<sup>19</sup>F-NMR (376MHz, DMSO)

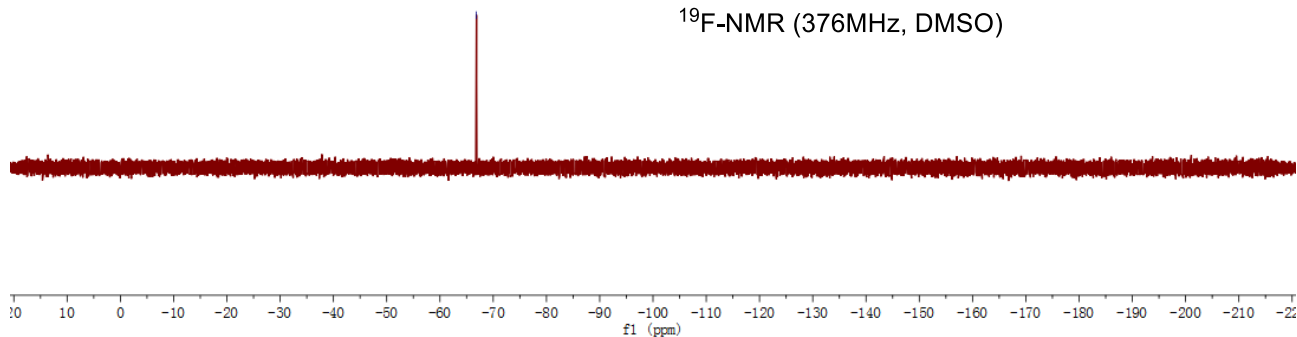

GY-SS2-877 8 (0.211)

1: TOF MS ES+  
5.00e4

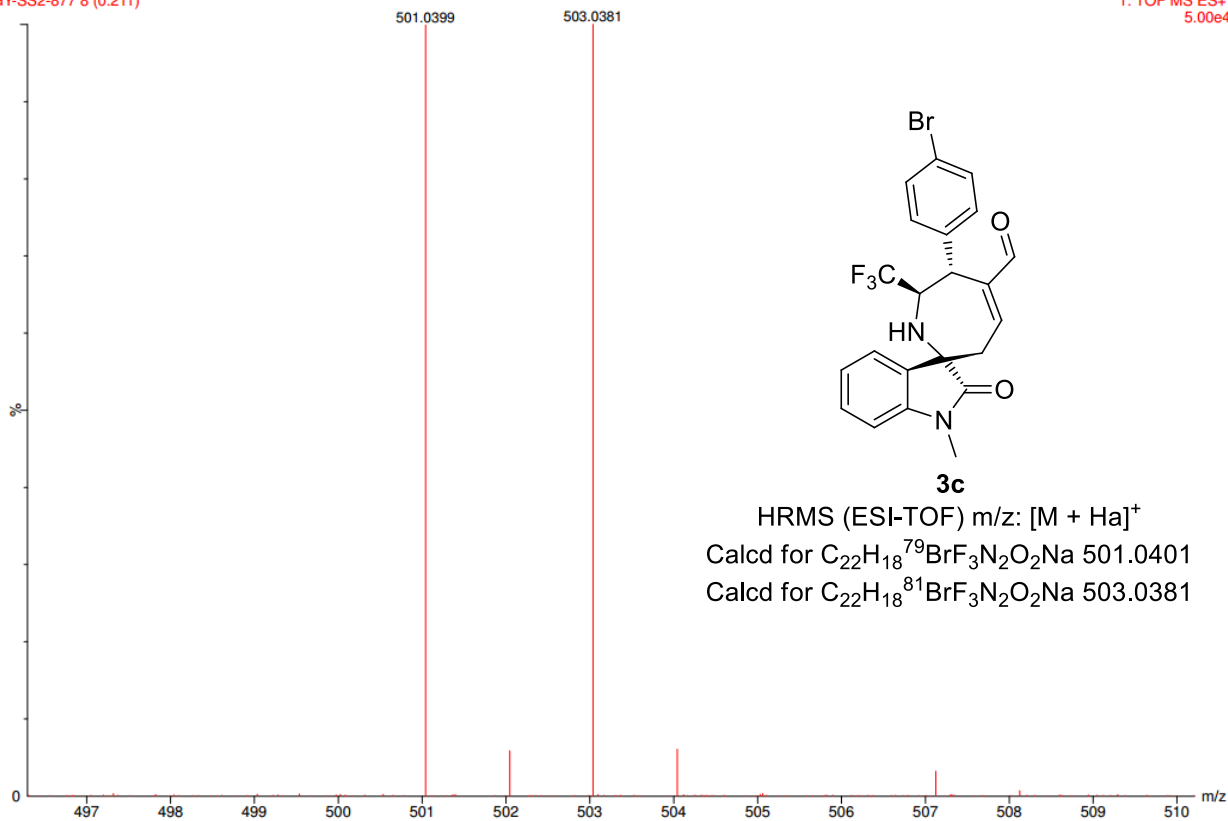

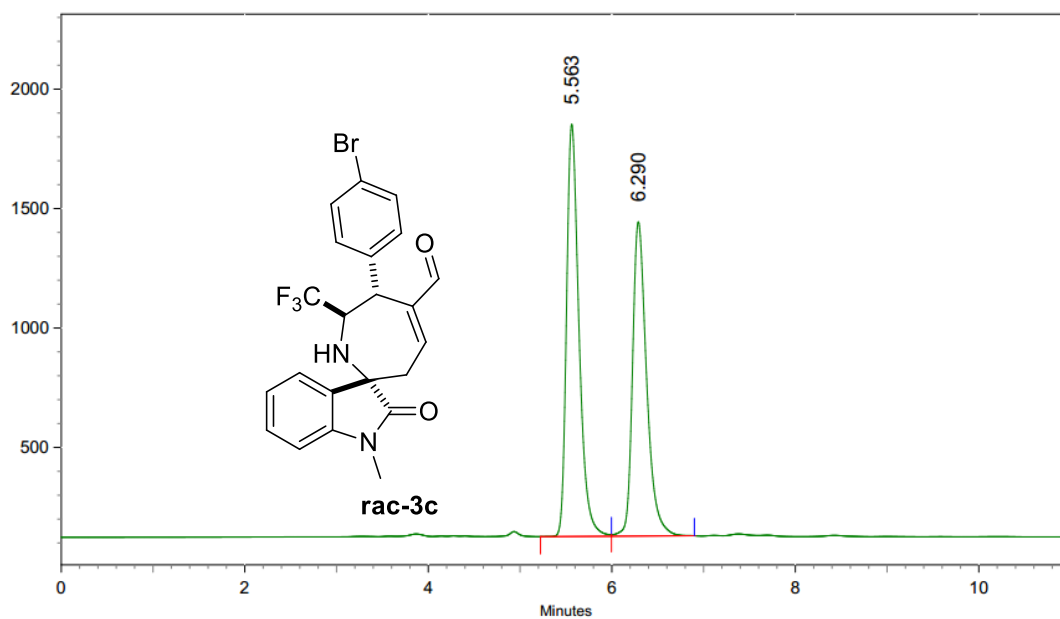

### AREA PERCENT REPORT

| Peak No. | Ret Time | Width | Height   | Area      | Area [%] |
|----------|----------|-------|----------|-----------|----------|
| 1        | 5.563    | 0.773 | 28955456 | 272437985 | 53.5868  |
| 2        | 6.290    | 0.903 | 22071340 | 235967286 | 46.4132  |

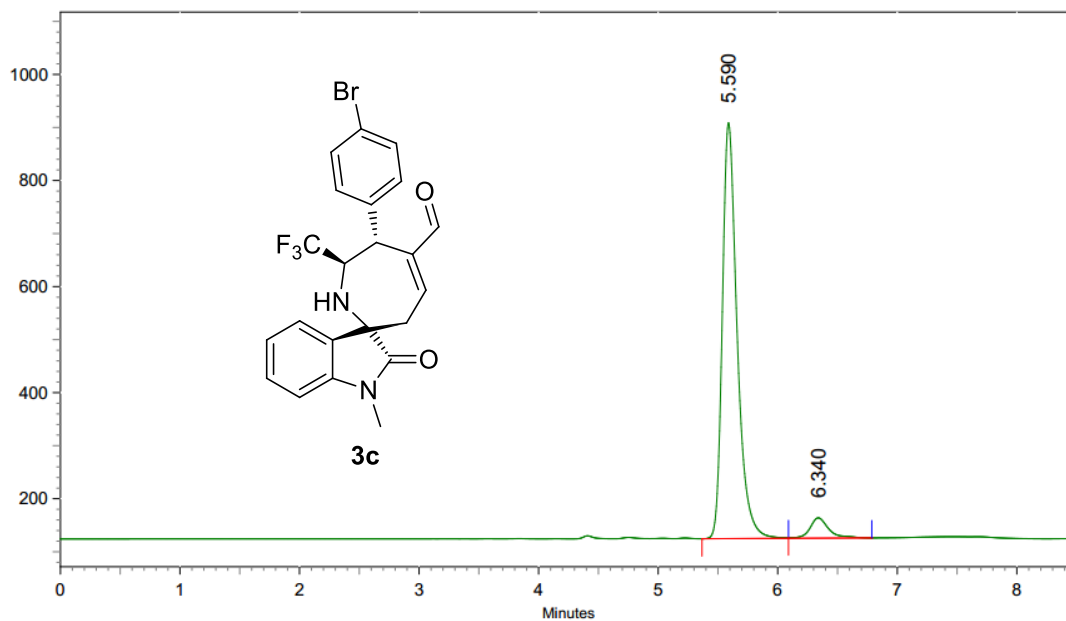

### AREA PERCENT REPORT

| Peak No. | Ret Time | Width | Height   | Area      | Area [%] |
|----------|----------|-------|----------|-----------|----------|
| 1        | 5.590    | 0.723 | 13149877 | 112710668 | 94.1583  |
| 2        | 6.340    | 0.697 | 642660   | 6992692   | 5.8417   |

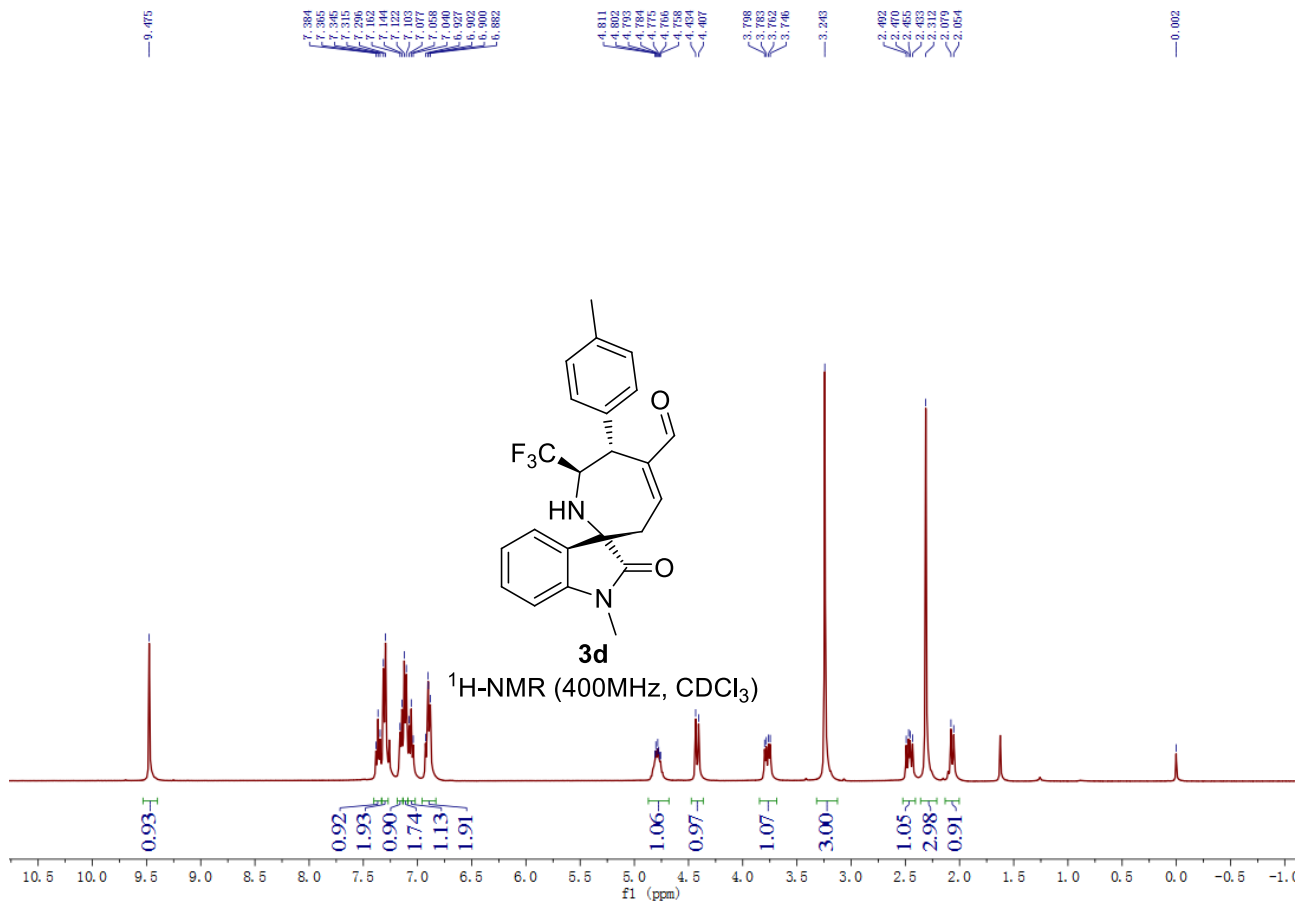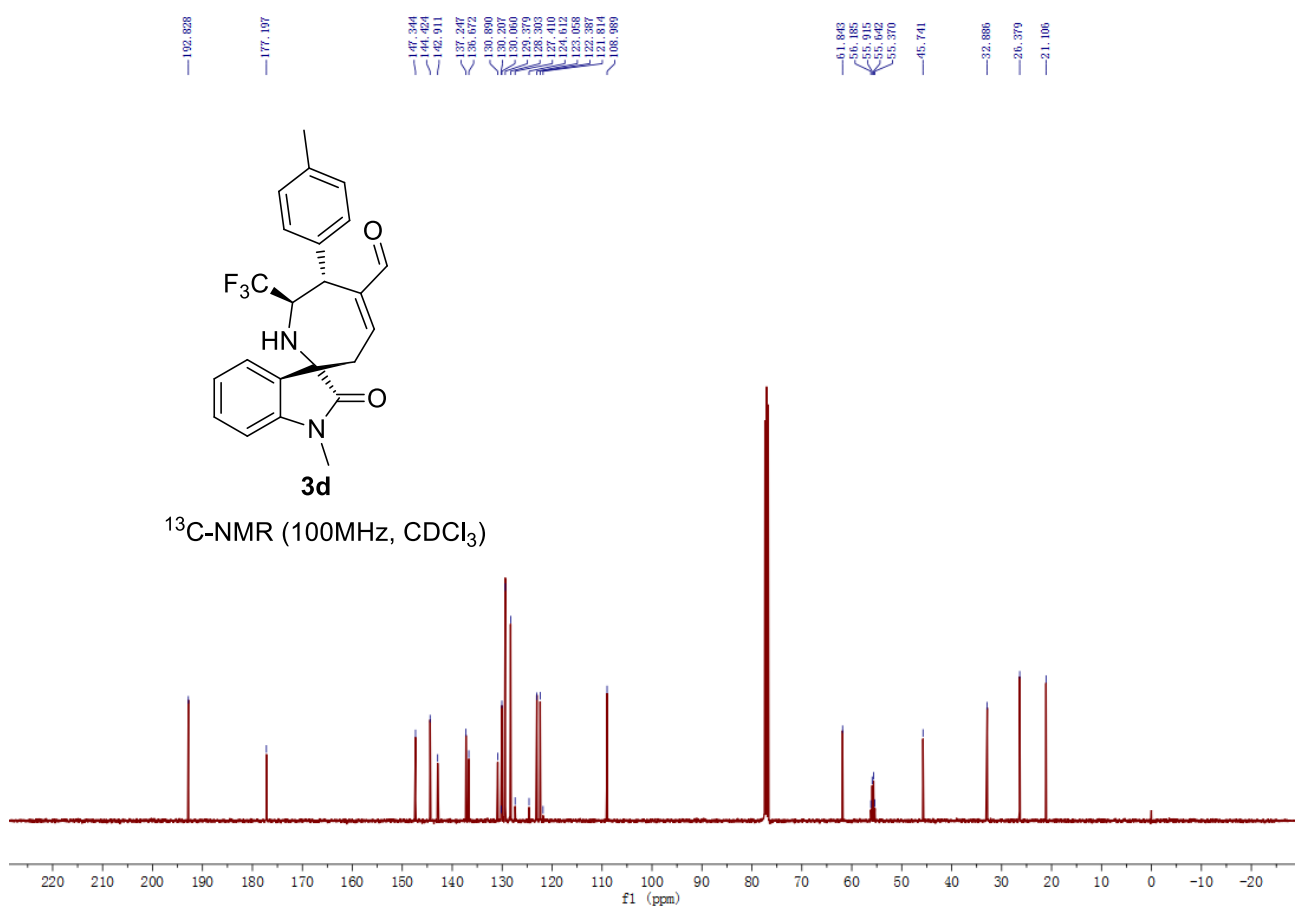

-71.035

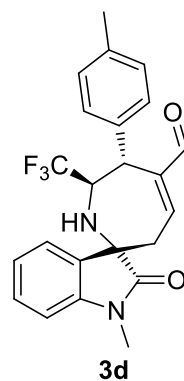

**3d**  
<sup>19</sup>F-NMR (376MHz, CDCl<sub>3</sub>)

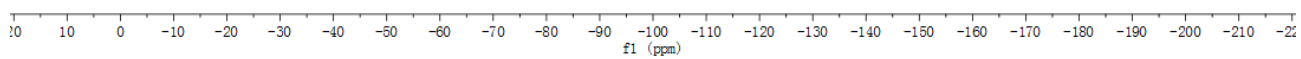

GY-SS3-862 12 (0.299)

437.1443

1: TOF MS ES+  
1.50e5

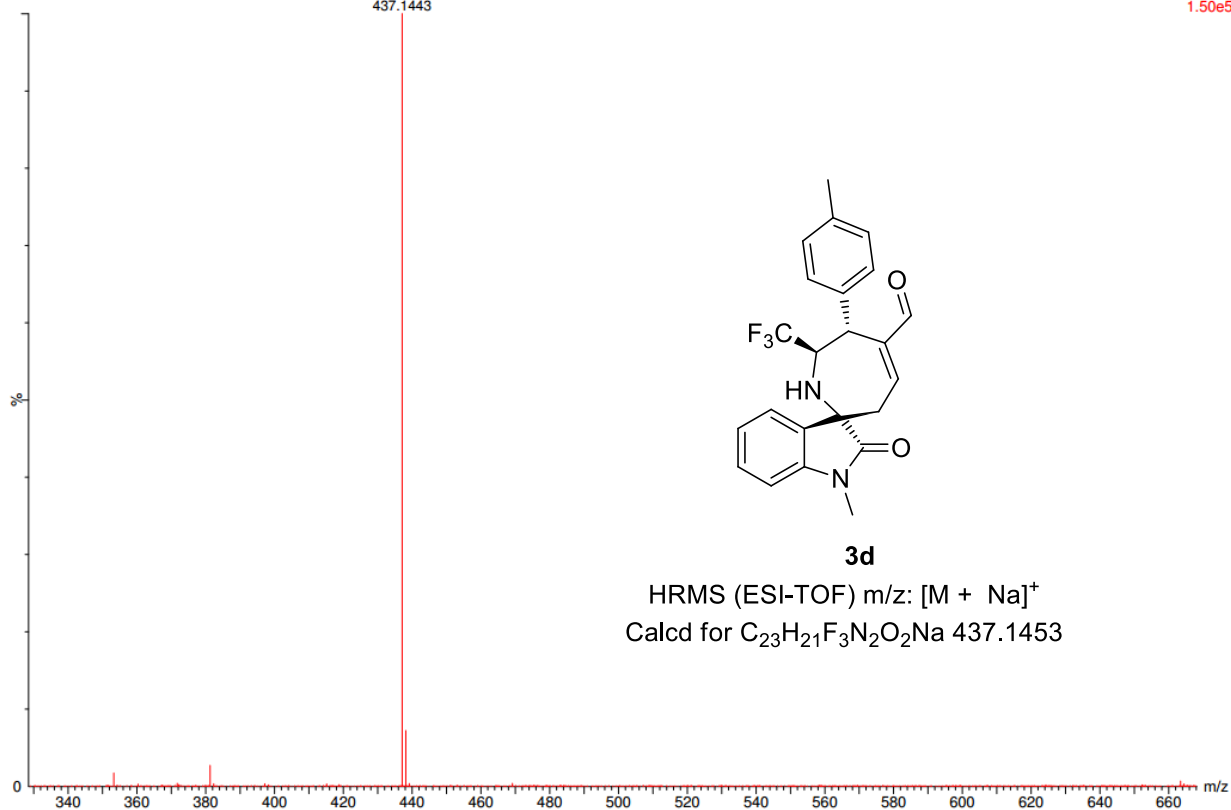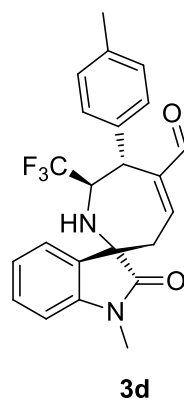

**3d**  
HRMS (ESI-TOF) m/z: [M + Na]<sup>+</sup>  
Calcd for C<sub>23</sub>H<sub>21</sub>F<sub>3</sub>N<sub>2</sub>O<sub>2</sub>Na 437.1453

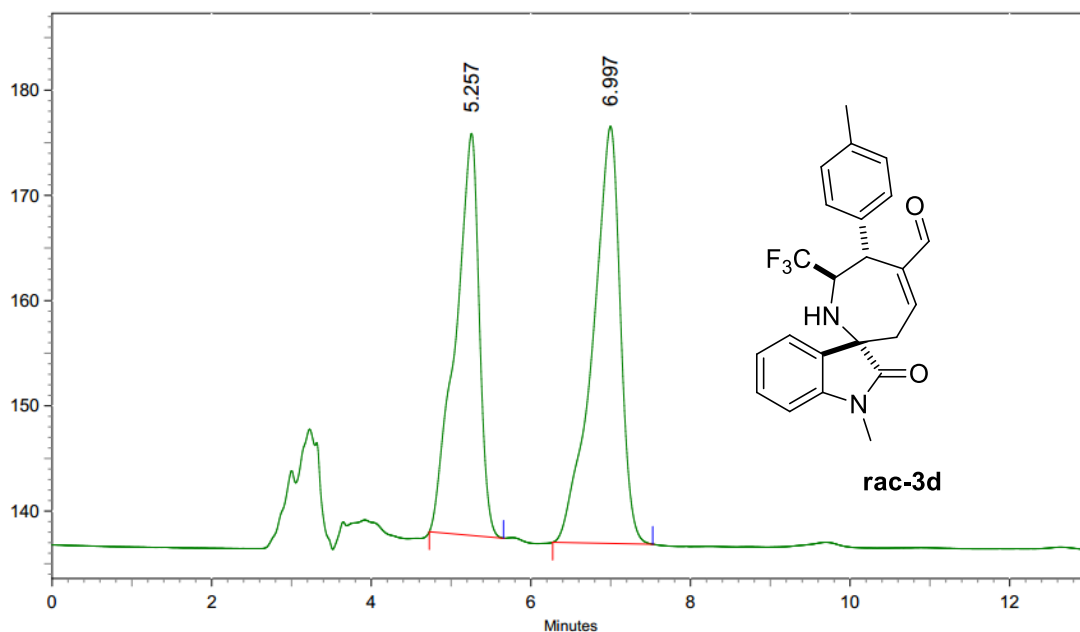

**AREA PERCENT REPORT**

| Peak No. | Ret Time | Width | Height | Area     | Area [%] |
|----------|----------|-------|--------|----------|----------|
| 1        | 5.257    | 0.930 | 640914 | 13166767 | 45.0624  |
| 2        | 6.997    | 1.253 | 665000 | 16052198 | 54.9376  |

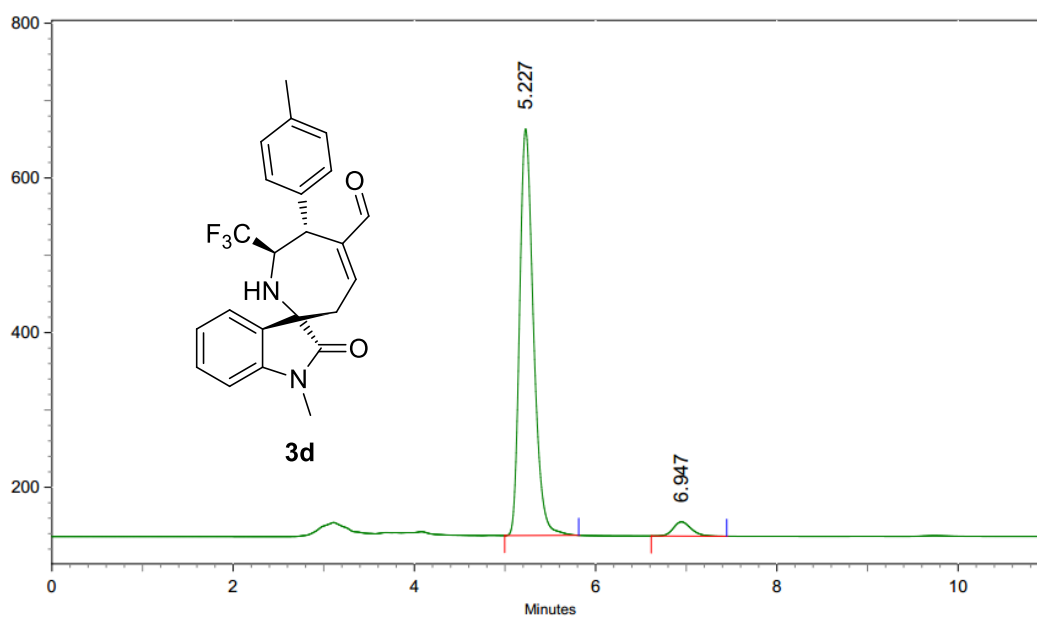

**AREA PERCENT REPORT**

| Peak No. | Ret Time | Width | Height  | Area     | Area [%] |
|----------|----------|-------|---------|----------|----------|
| 1        | 5.227    | 0.817 | 8818510 | 93455631 | 95.6570  |
| 2        | 6.947    | 0.833 | 309458  | 4243078  | 4.3430   |

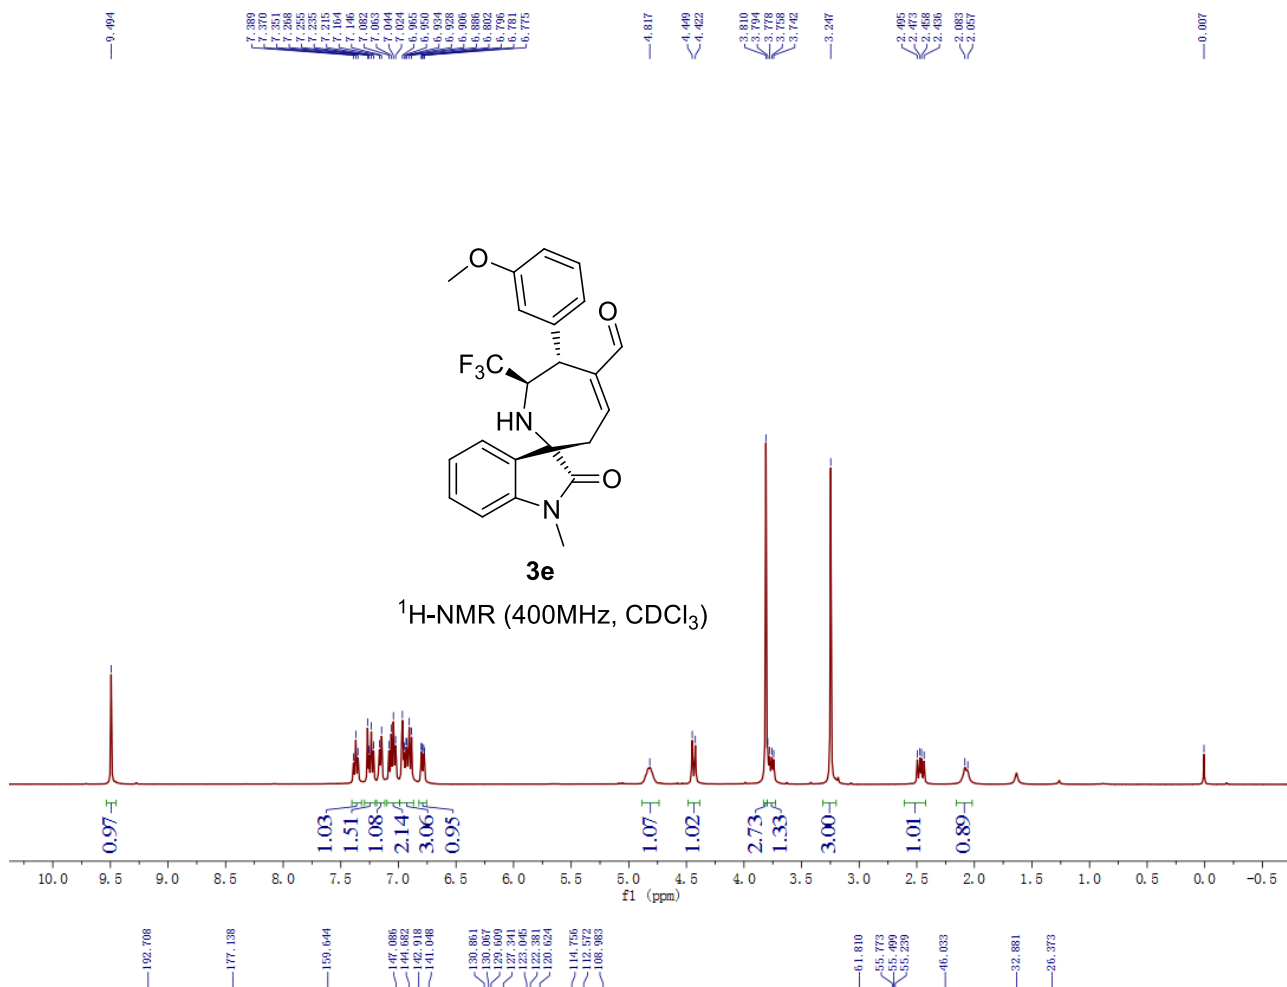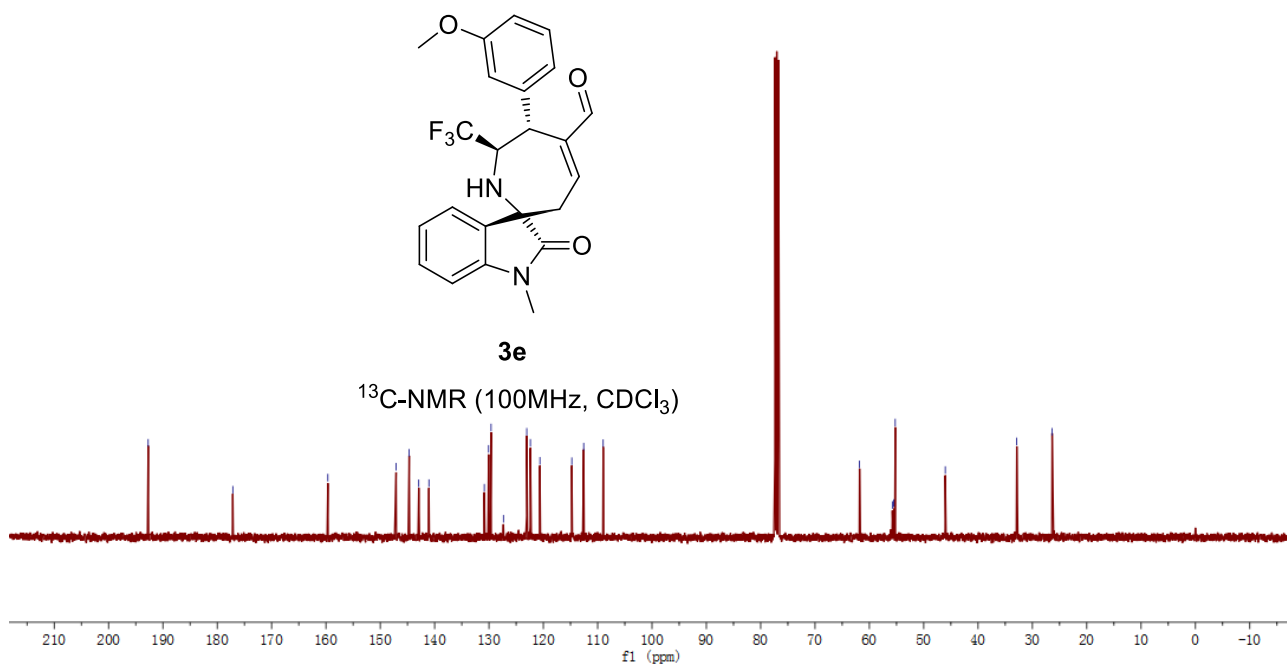

-71.077

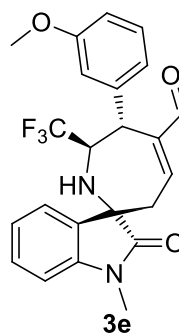

<sup>19</sup>F-NMR (376MHz, CDCl<sub>3</sub>)

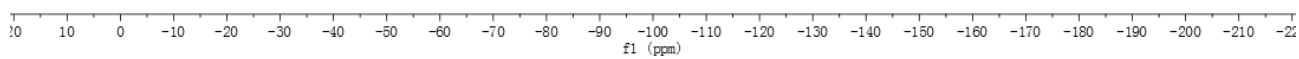

GY-SS6-862 18 (0.440)

453.1394

1: TOF MS ES+  
6.39e4

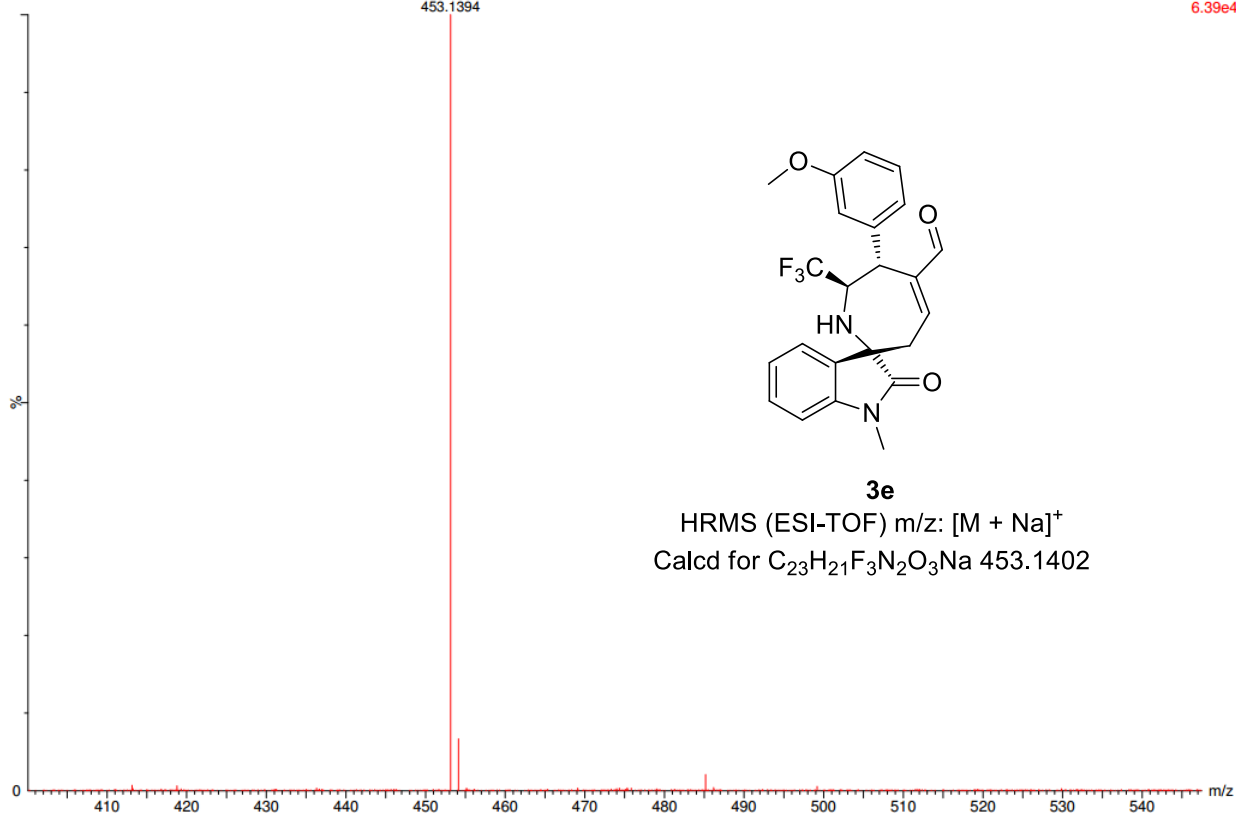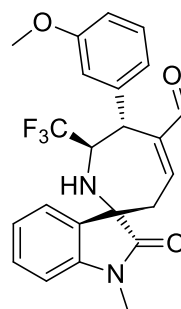

**3e**

HRMS (ESI-TOF) m/z: [M + Na]<sup>+</sup>  
Calcd for C<sub>23</sub>H<sub>21</sub>F<sub>3</sub>N<sub>2</sub>O<sub>3</sub>Na 453.1402



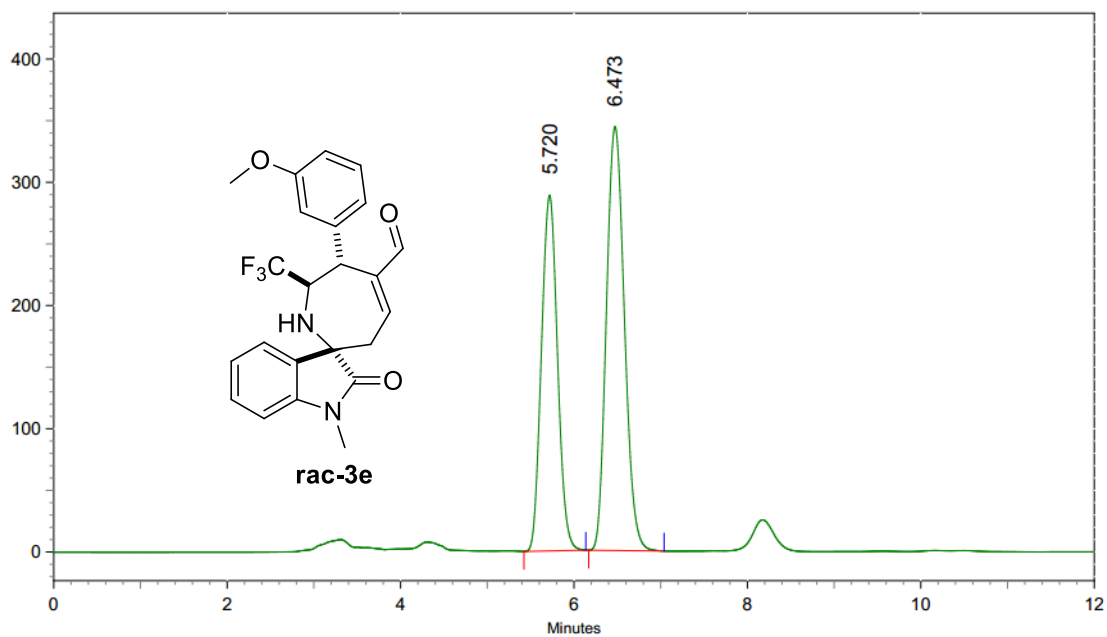

### AREA PERCENT REPORT

| Peak No. | Ret Time | Width | Height  | Area     | Area [%] |
|----------|----------|-------|---------|----------|----------|
| 1        | 5.720    | 0.713 | 4843244 | 62270743 | 42.8676  |
| 2        | 6.473    | 0.870 | 5771079 | 82992359 | 57.1324  |

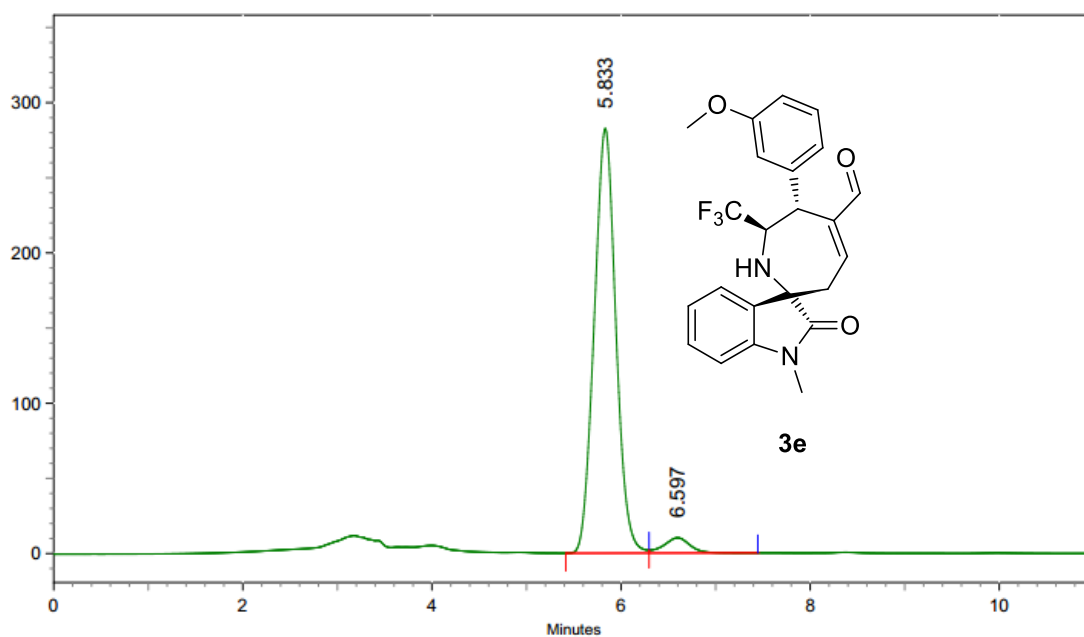

### AREA PERCENT REPORT

| Peak No. | Ret Time | Width | Height  | Area     | Area [%] |
|----------|----------|-------|---------|----------|----------|
| 1        | 5.833    | 0.880 | 4740436 | 75314050 | 95.8647  |
| 2        | 6.597    | 1.150 | 170545  | 3248789  | 4.1353   |

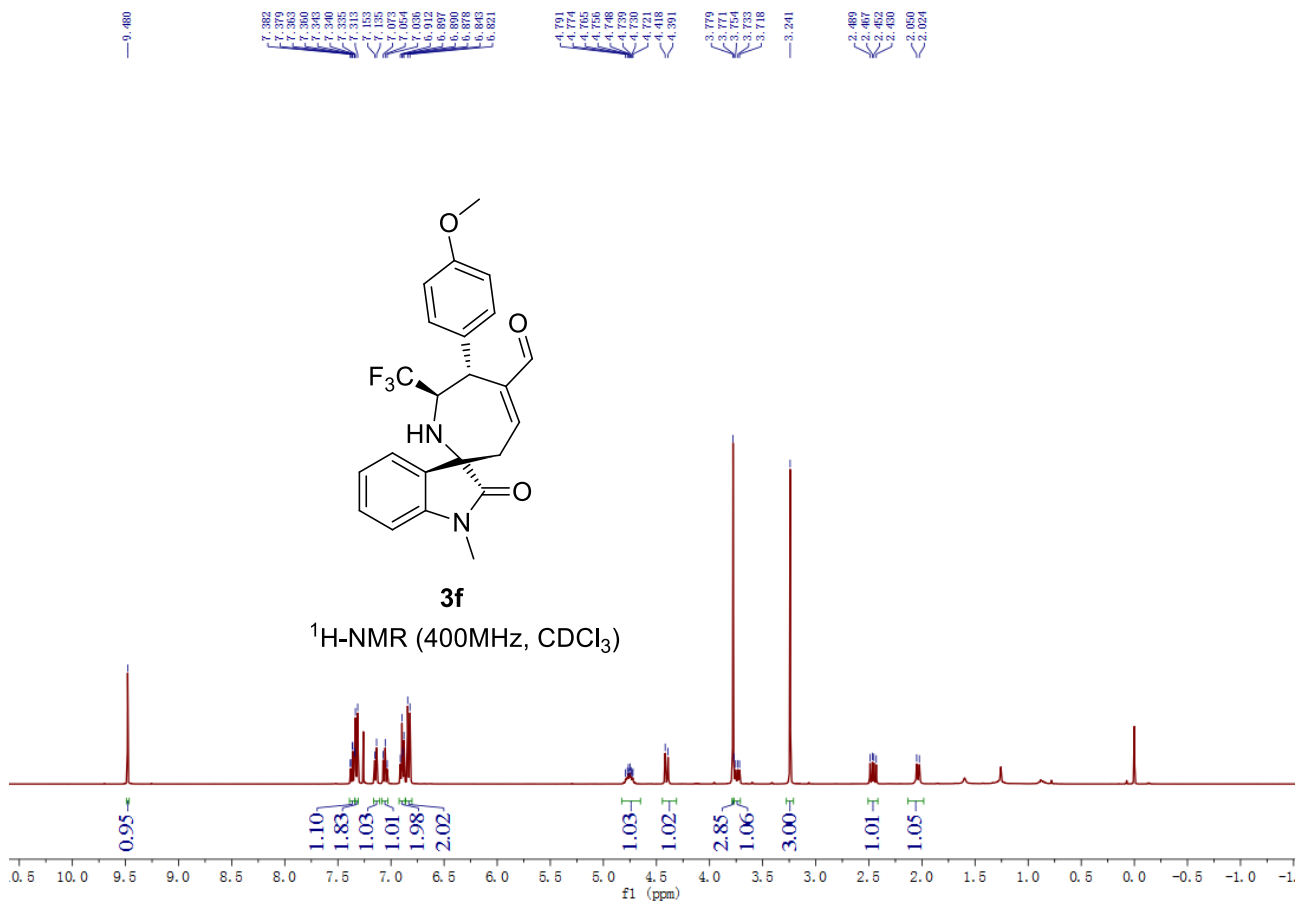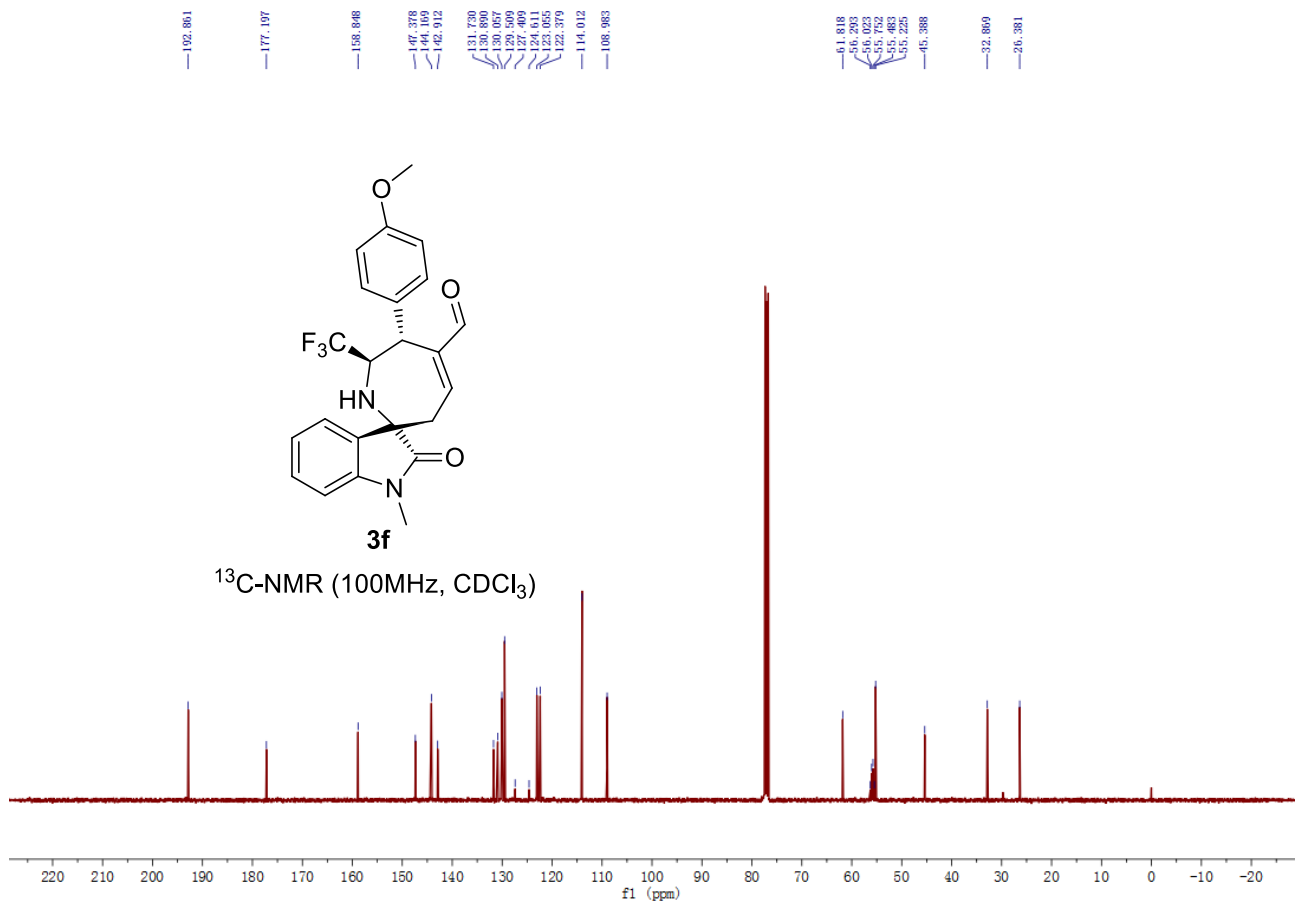

73.996

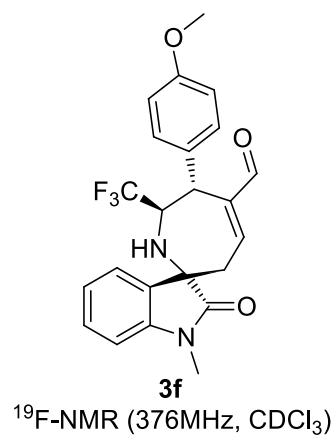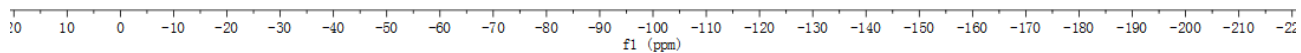

GY-SS4-862 15 (0.370)

1: TOF MS ES+  
3.34e4

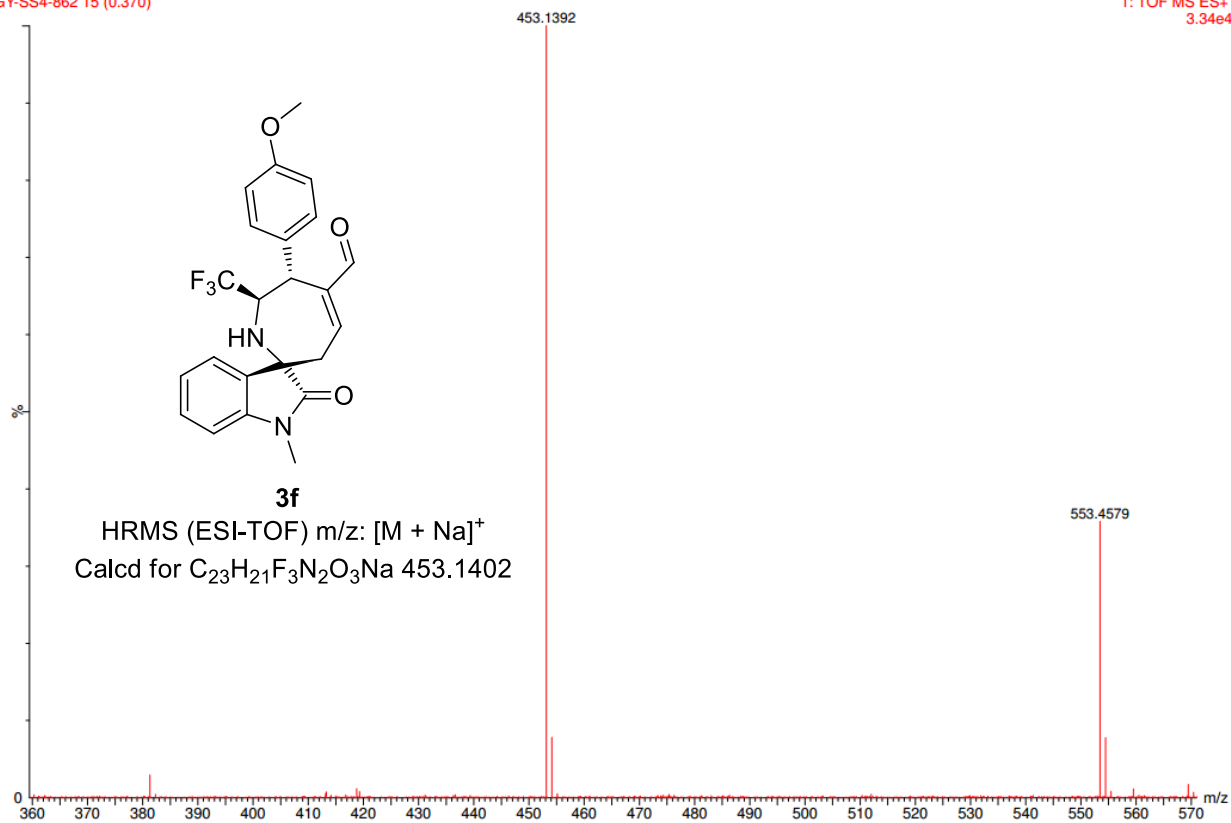

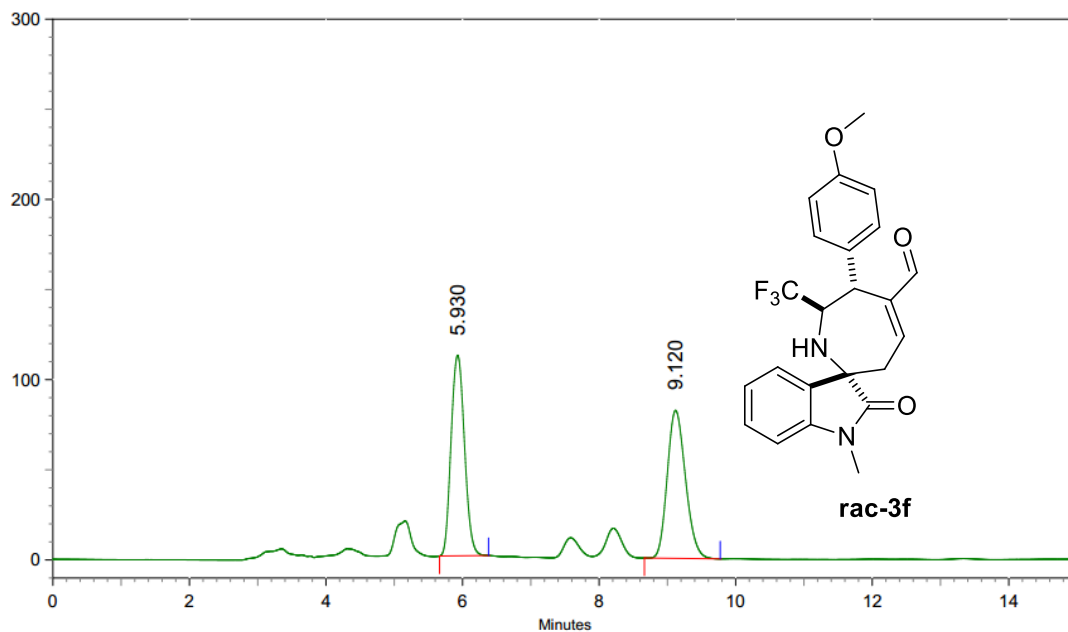

**AREA PERCENT REPORT**

| Peak No. | Ret Time | Width | Height  | Area     | Area [%] |
|----------|----------|-------|---------|----------|----------|
| 1        | 5.930    | 0.717 | 1867296 | 25496602 | 49.9390  |
| 2        | 9.120    | 1.110 | 1376944 | 25558919 | 50.0610  |

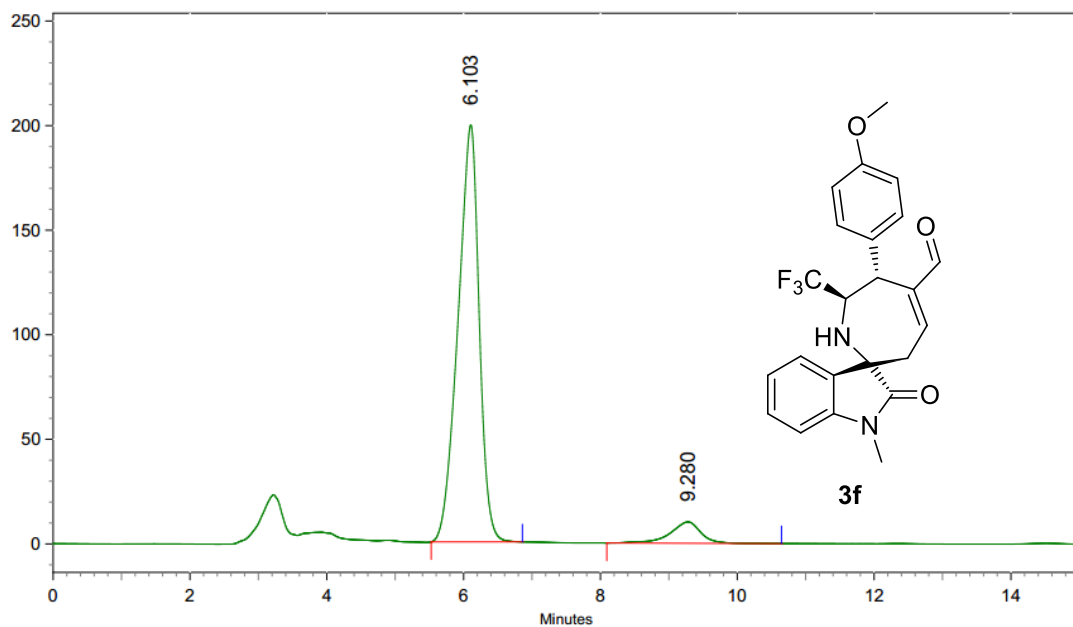

**AREA PERCENT REPORT**

| Peak No. | Ret Time | Width | Height  | Area     | Area [%] |
|----------|----------|-------|---------|----------|----------|
| 1        | 6.103    | 1.333 | 3343993 | 71825240 | 93.0758  |
| 2        | 9.280    | 2.553 | 170982  | 5343271  | 6.9242   |

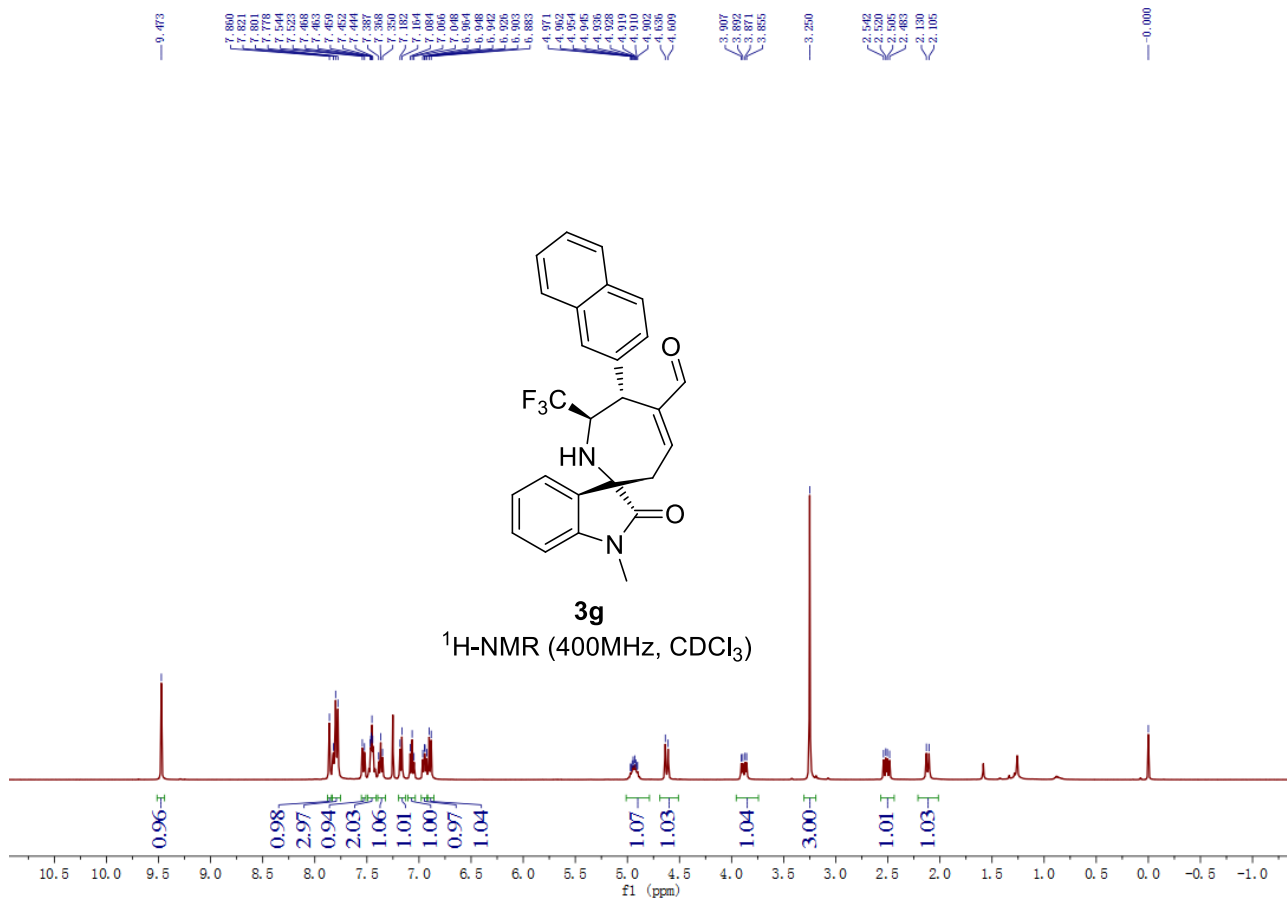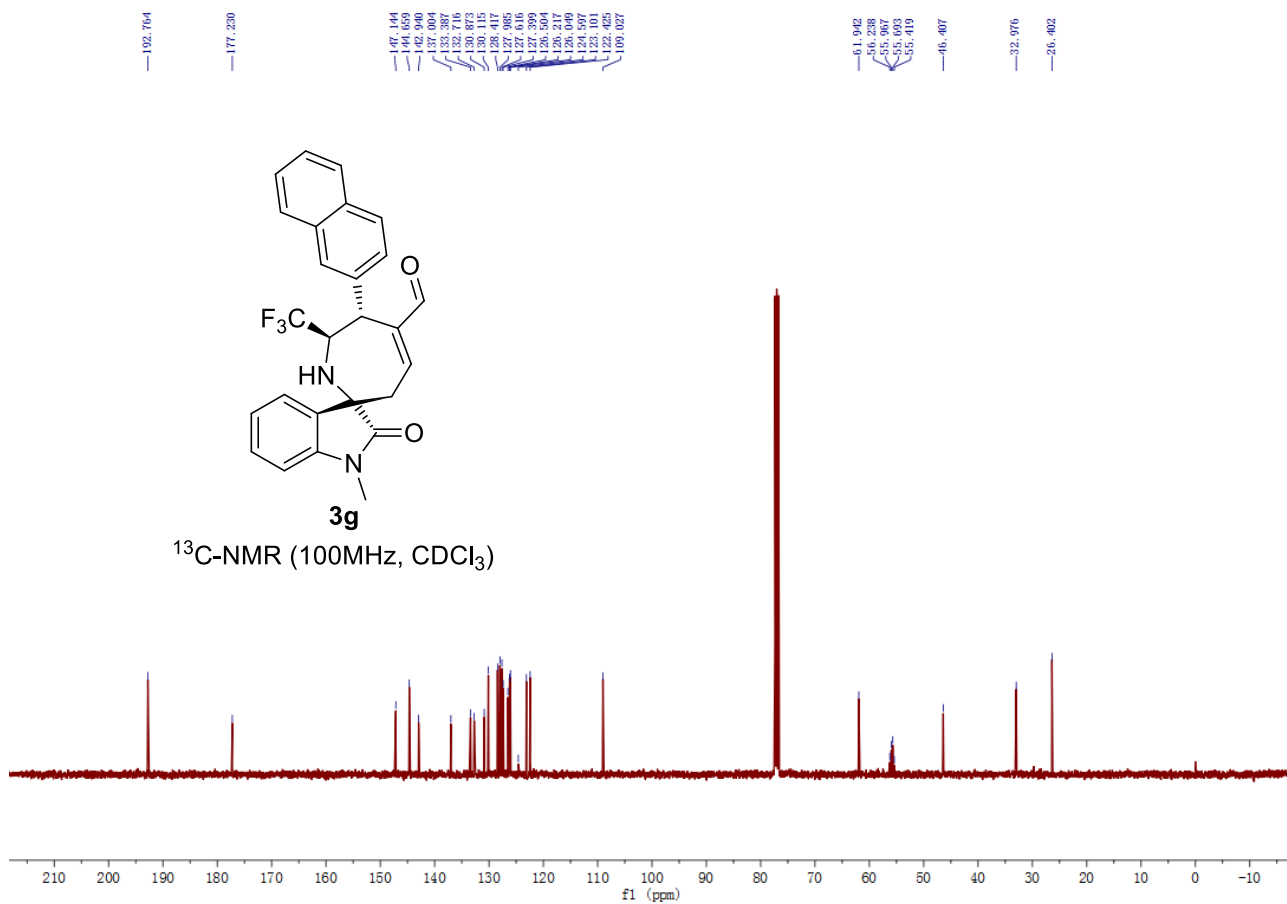

71.265

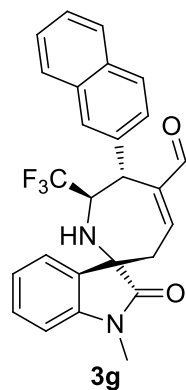

<sup>19</sup>F-NMR (376MHz, CDCl<sub>3</sub>)

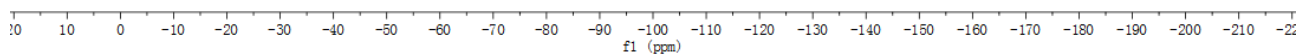

### Spectrum Plot Report

Agilent | Trusted Answers

| Name           | CYC-20191124-18   | Rack Pos.    | Instrument | Instrument 1 | Operator                         |
|----------------|-------------------|--------------|------------|--------------|----------------------------------|
| Inj. Vol. (ul) | 10                | Plate Pos.   | IRM Status | Success      |                                  |
| Data File      | CYC-20191124-18.d | Method (Acq) | TOF.m      |              | Acq. Time (Local)                |
|                |                   |              |            |              | 12/5/2019 5:24:28 PM (UTC+08:00) |

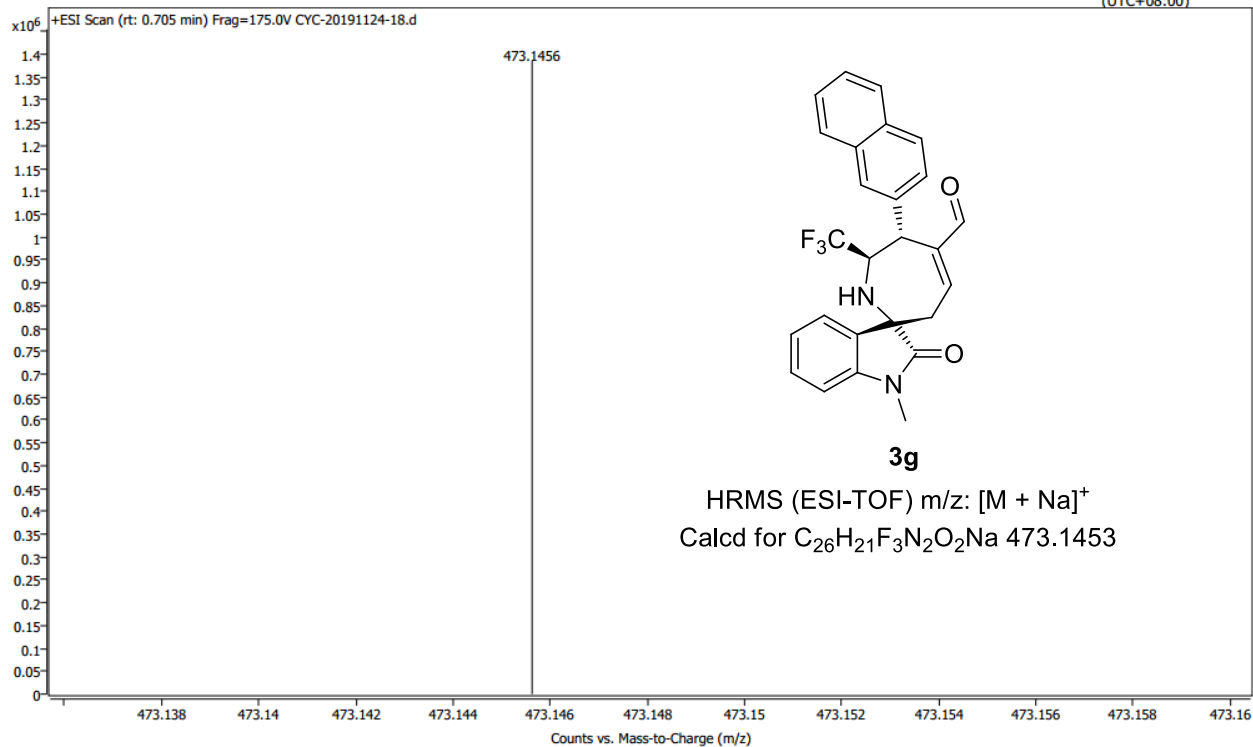

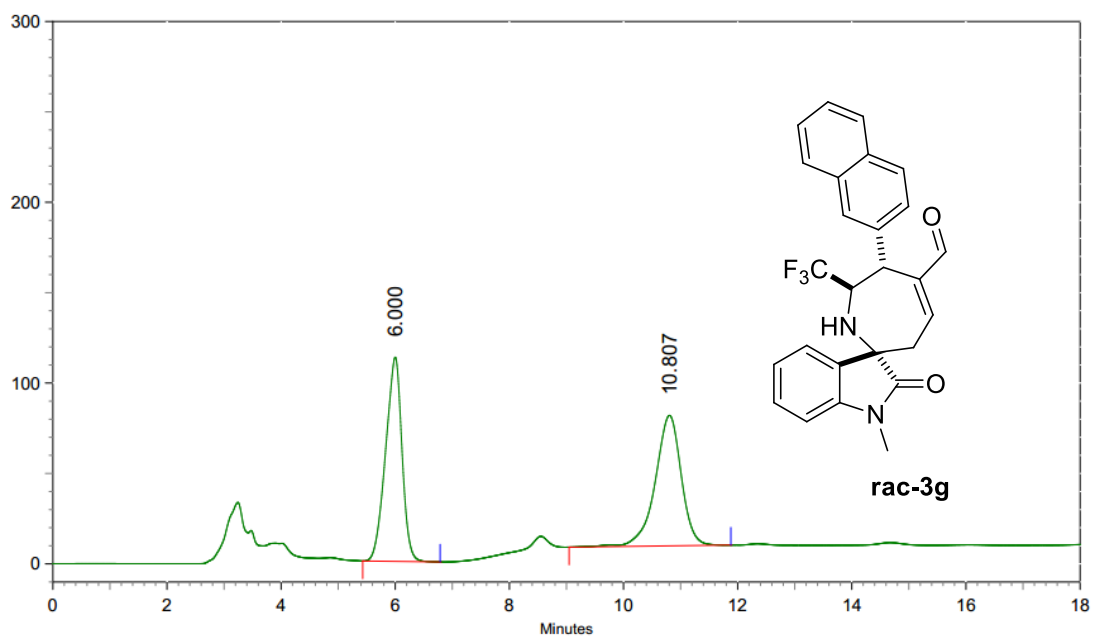

**AREA PERCENT REPORT**

| Peak No. | Ret Time | Width | Height  | Area     | Area [%] |
|----------|----------|-------|---------|----------|----------|
| 1        | 6.000    | 1.357 | 1895198 | 37807900 | 49.5270  |
| 2        | 10.807   | 2.833 | 1210333 | 38530011 | 50.4730  |

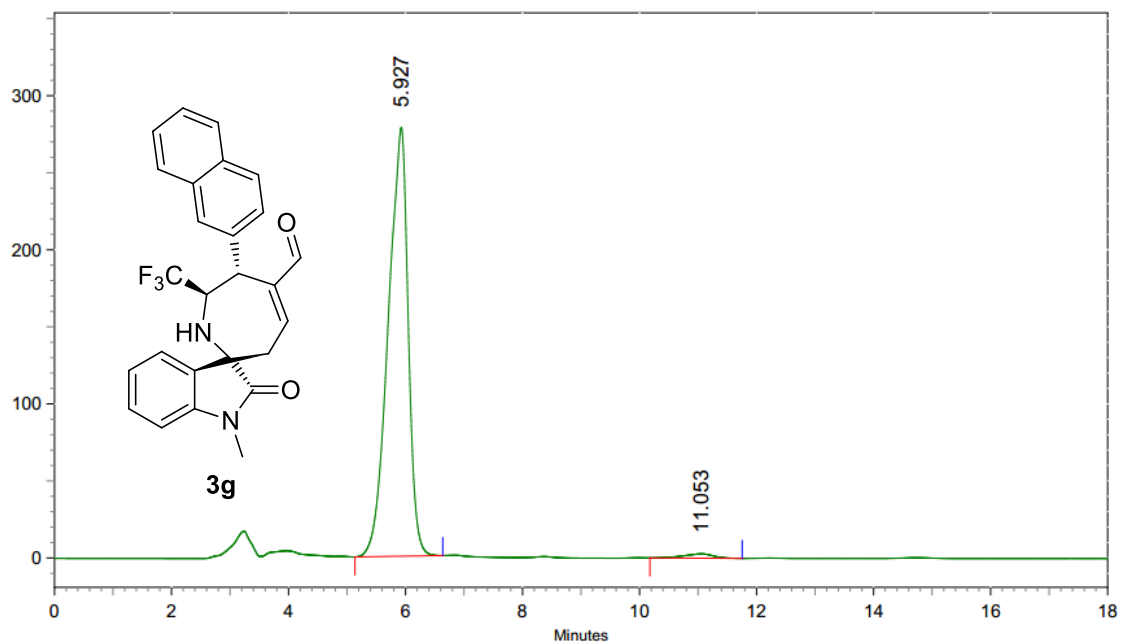

**AREA PERCENT REPORT**

| Peak No. | Ret Time | Width | Height  | Area      | Area [%] |
|----------|----------|-------|---------|-----------|----------|
| 1        | 5.927    | 1.500 | 4665881 | 110335939 | 98.5397  |
| 2        | 11.053   | 1.577 | 46737   | 1635156   | 1.4603   |

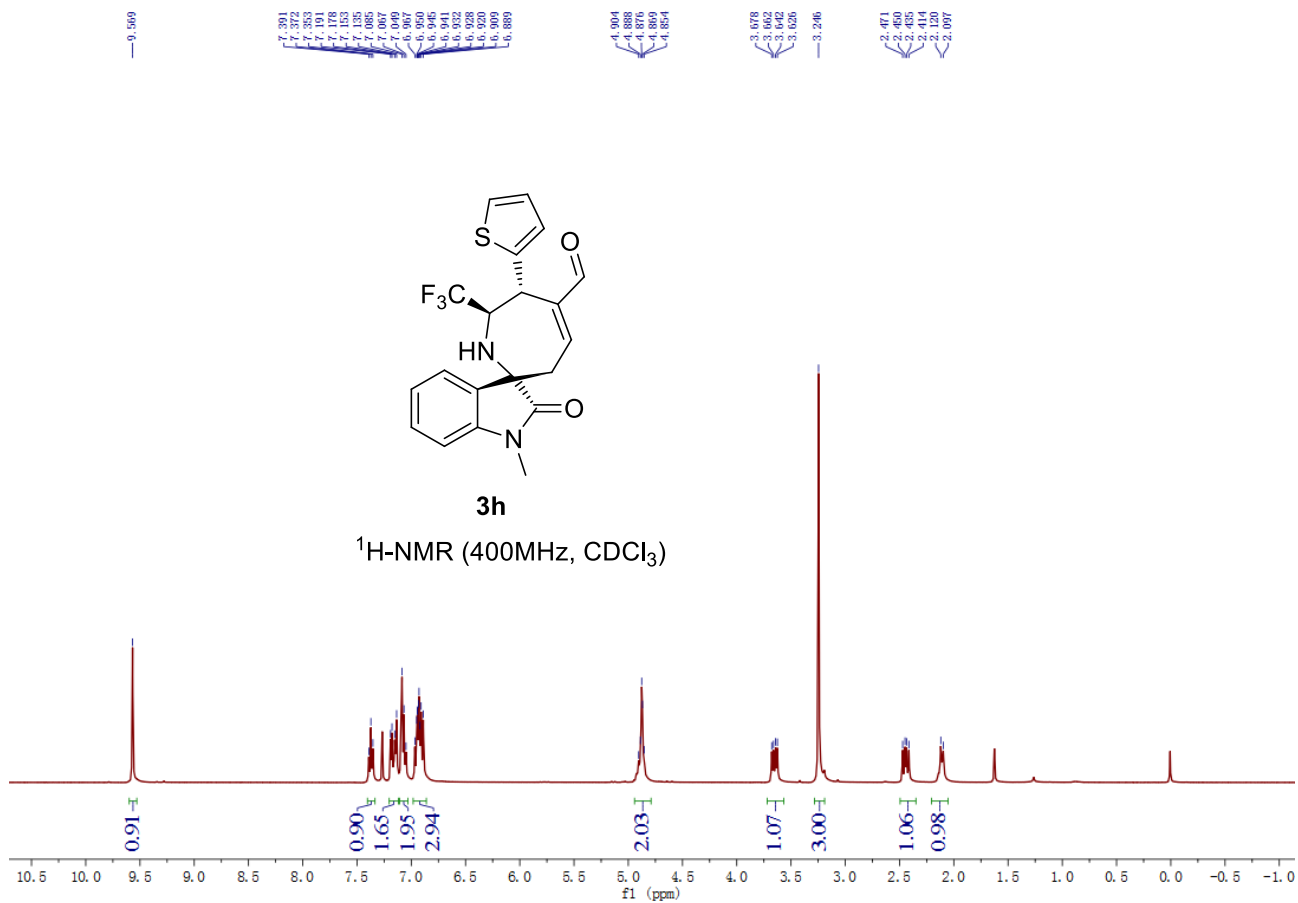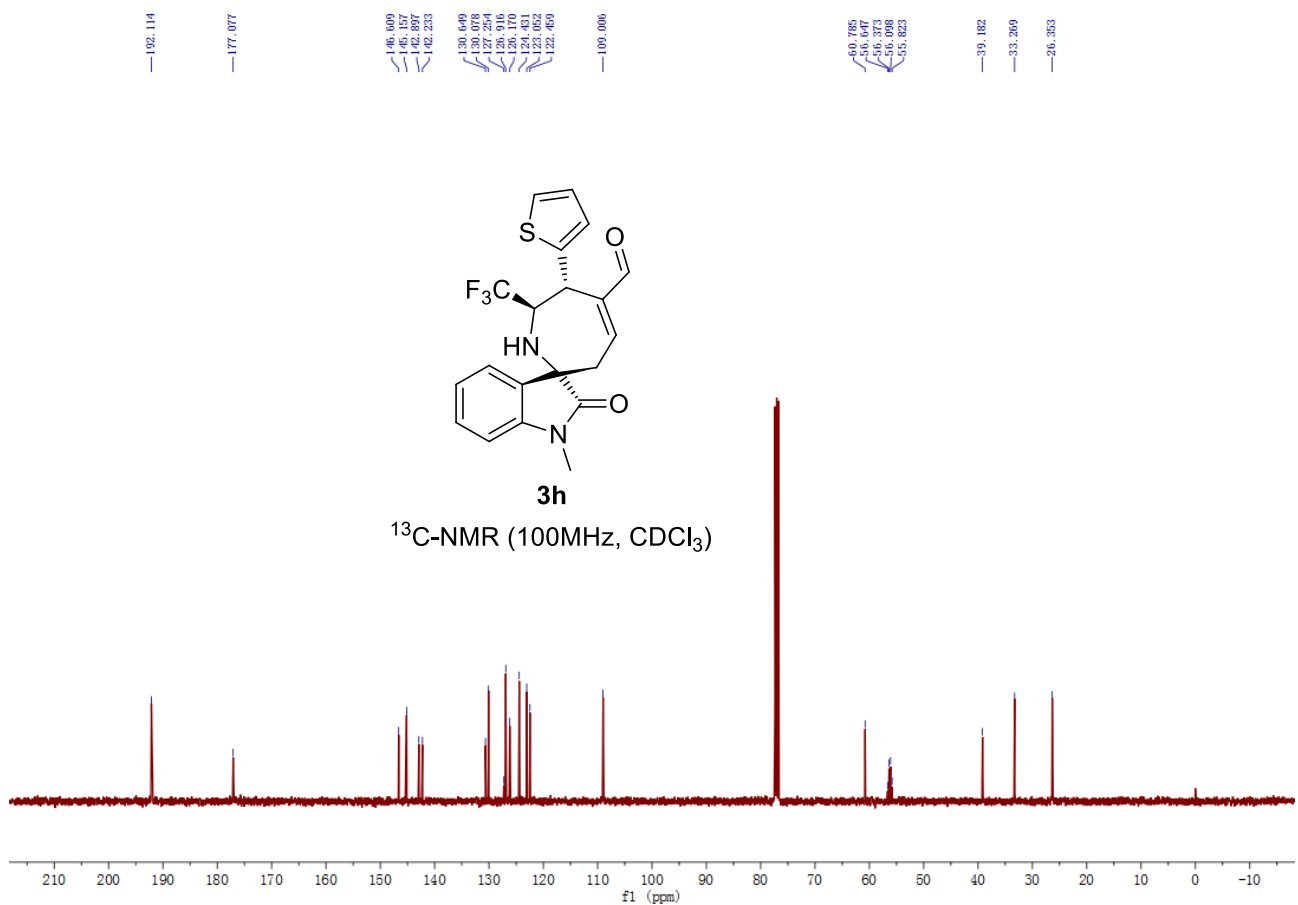



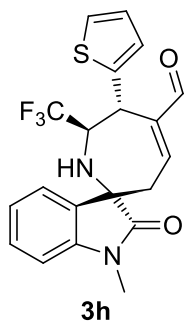

$^{19}\text{F}$ -NMR (376MHz,  $\text{CDCl}_3$ )

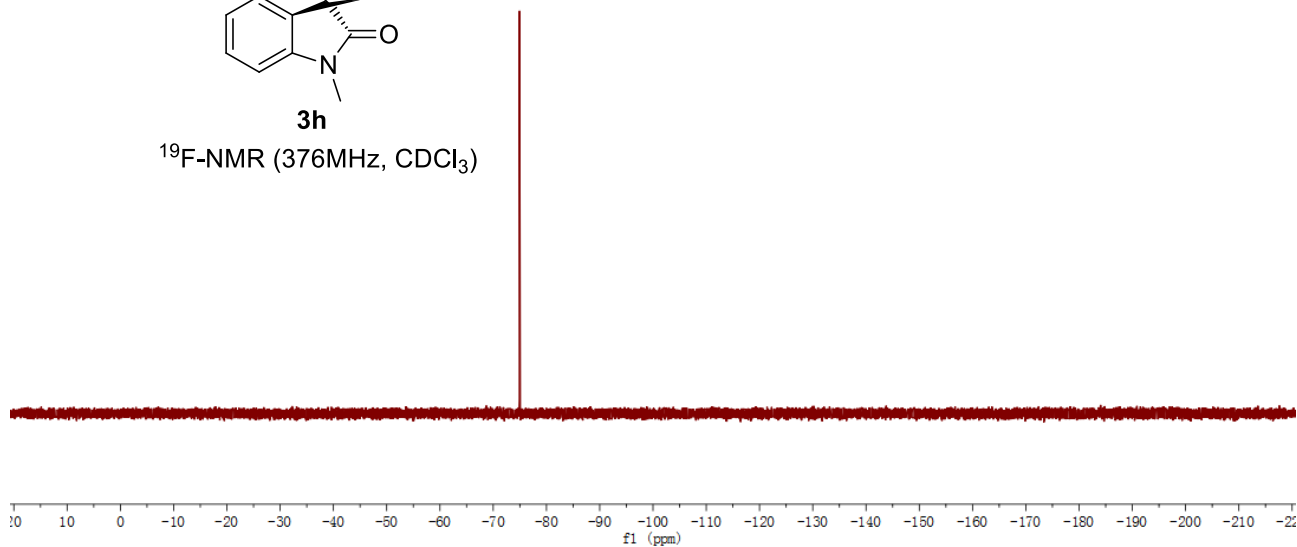

GY-SS8-862 9 (0.228)

429.0852

1: TOF MS ES+  
1.54e6

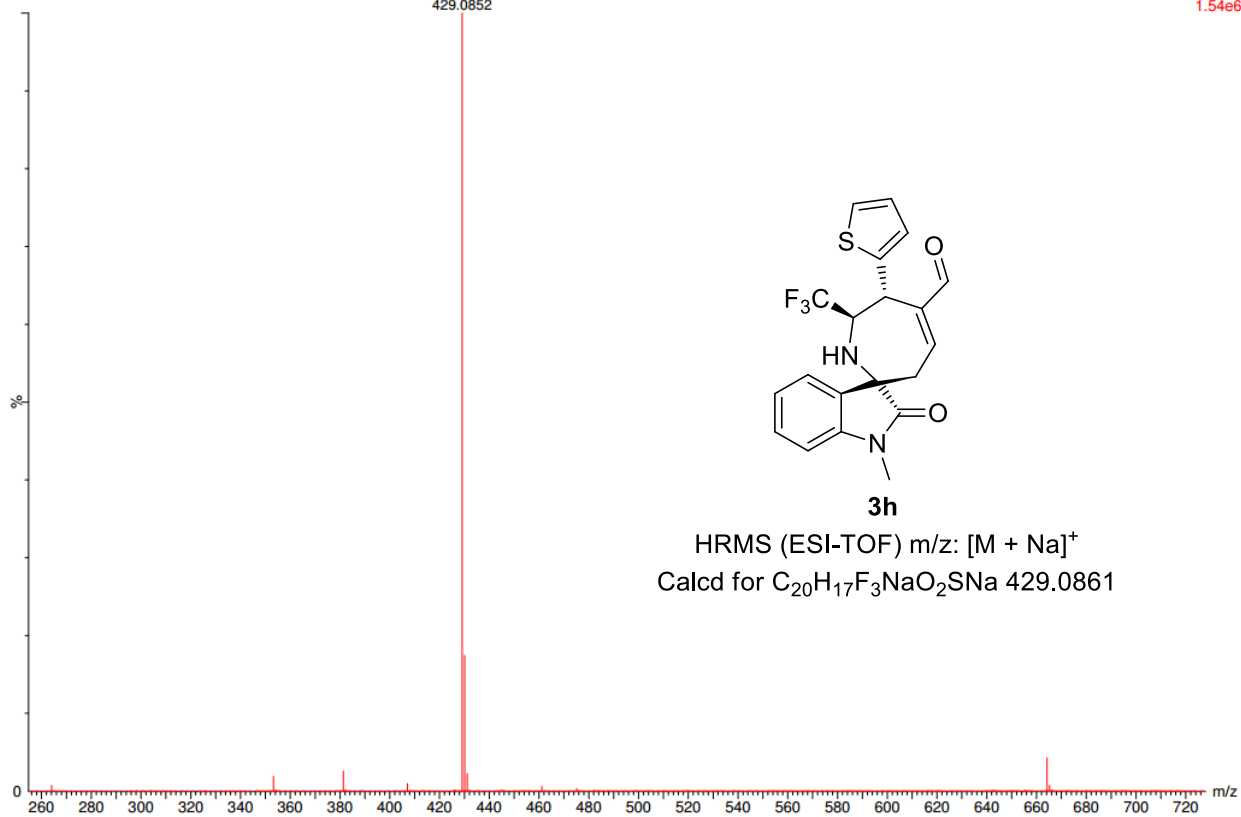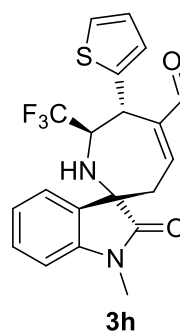

HRMS (ESI-TOF)  $m/z$ :  $[\text{M} + \text{Na}]^+$   
Calcd for  $\text{C}_{20}\text{H}_{17}\text{F}_3\text{NaO}_2\text{SNa}$  429.0861

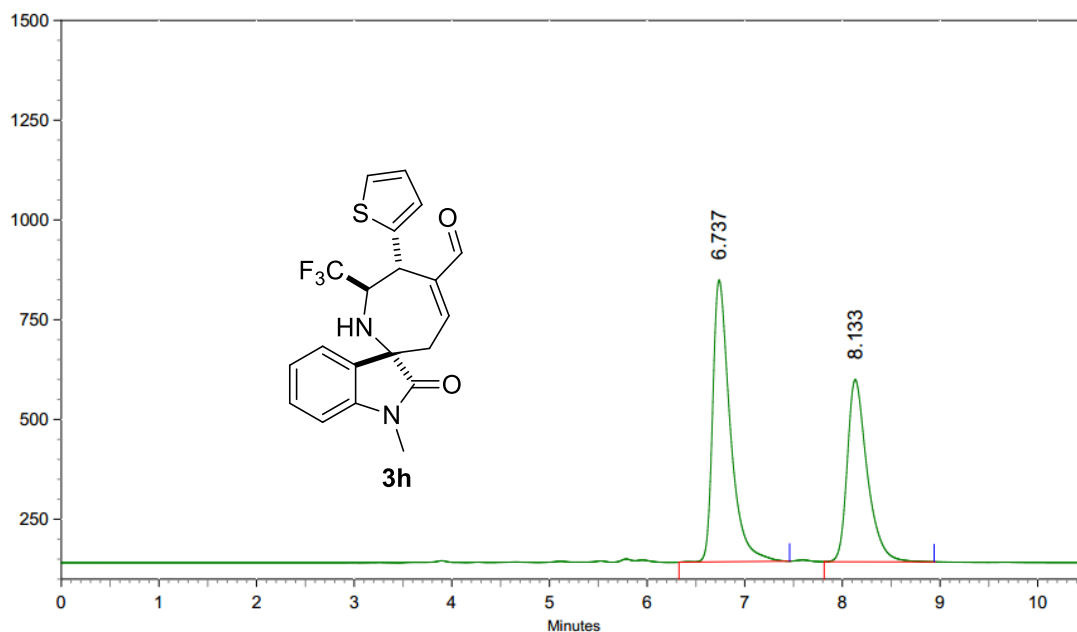

### AREA PERCENT REPORT

| Peak No. | Ret Time | Width | Height   | Area      | Area [%] |
|----------|----------|-------|----------|-----------|----------|
| 1        | 6.737    | 1.133 | 11848156 | 147141819 | 57.4872  |
| 2        | 8.133    | 1.127 | 7659915  | 108814018 | 42.5128  |

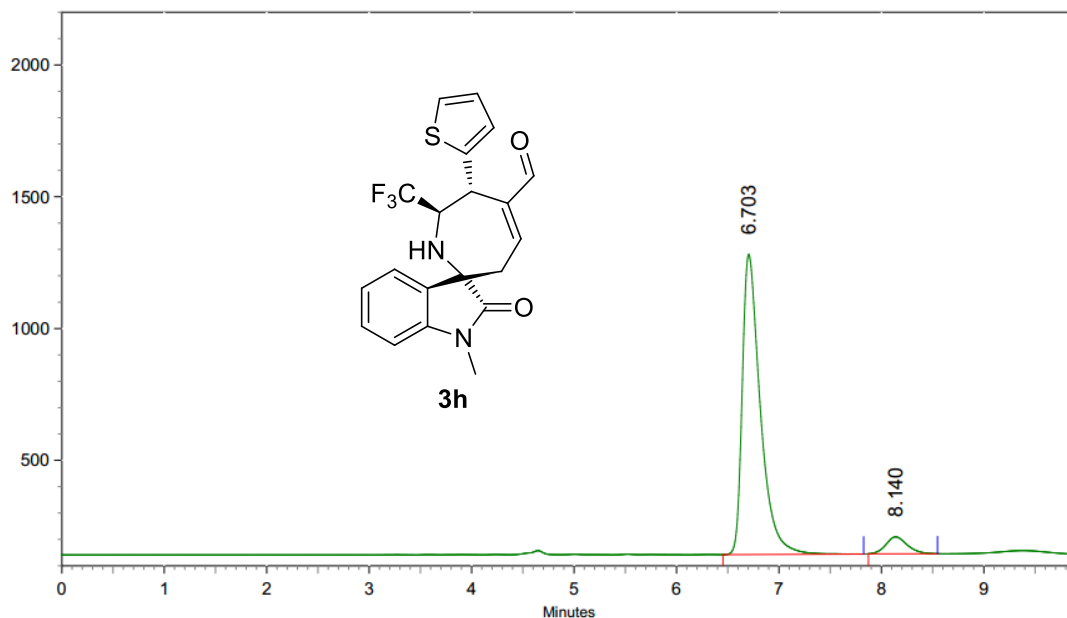

### AREA PERCENT REPORT

| Peak No. | Ret Time | Width | Height   | Area      | Area [%] |
|----------|----------|-------|----------|-----------|----------|
| 1        | 6.703    | 1.373 | 19103979 | 234131608 | 93.7380  |
| 2        | 8.140    | 0.673 | 1079181  | 15640819  | 6.2620   |

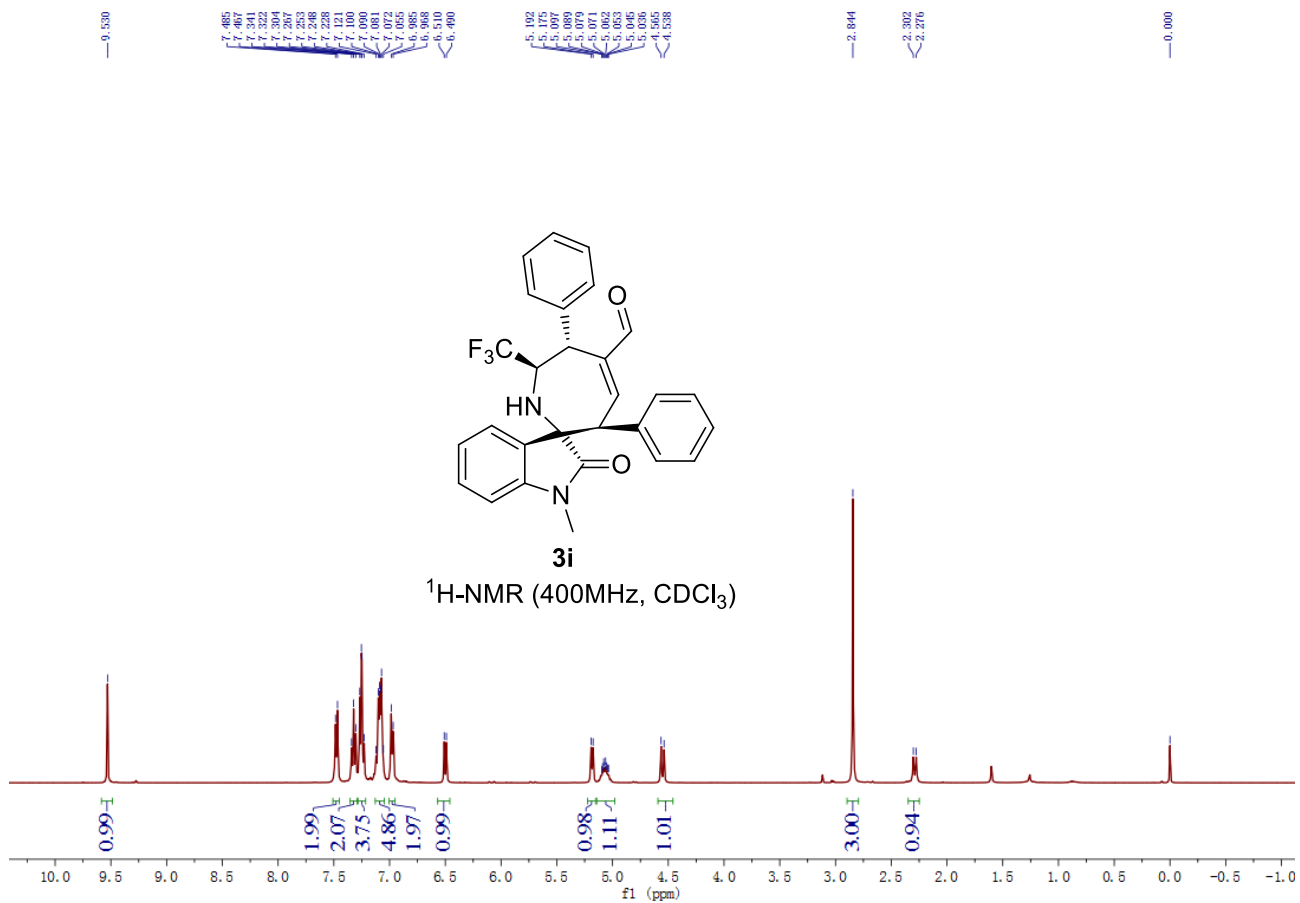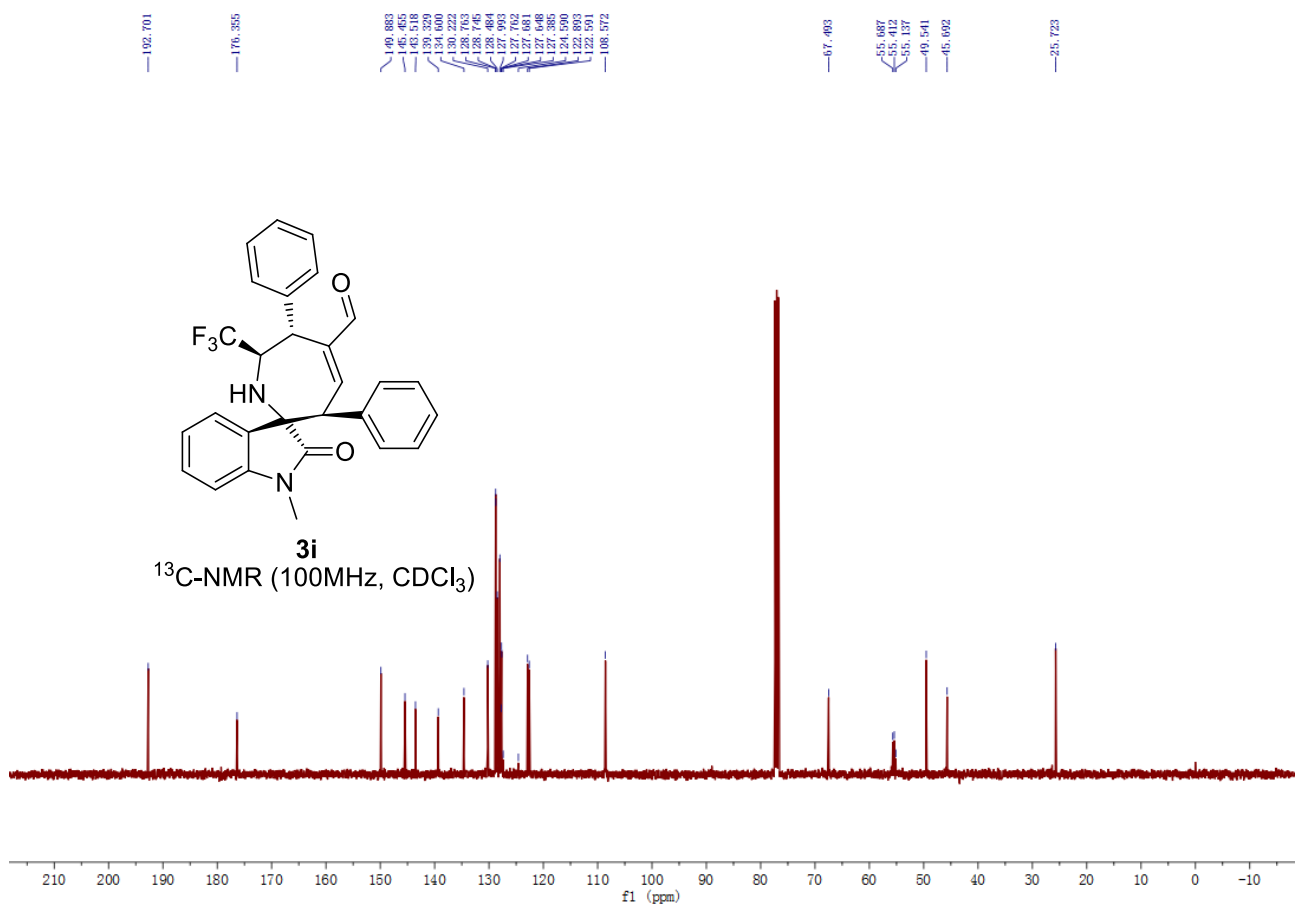

-71.195

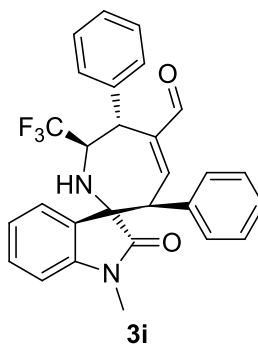

**3i**  
<sup>19</sup>F-NMR (376MHz, CDCl<sub>3</sub>)

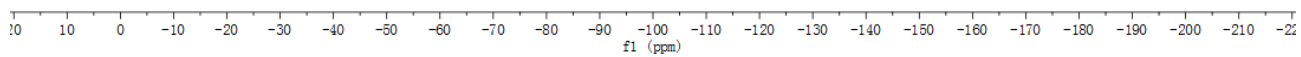

GY-SS9-862 22 (0.548)

499.1601

1: TOF MS ES+  
7.82e4

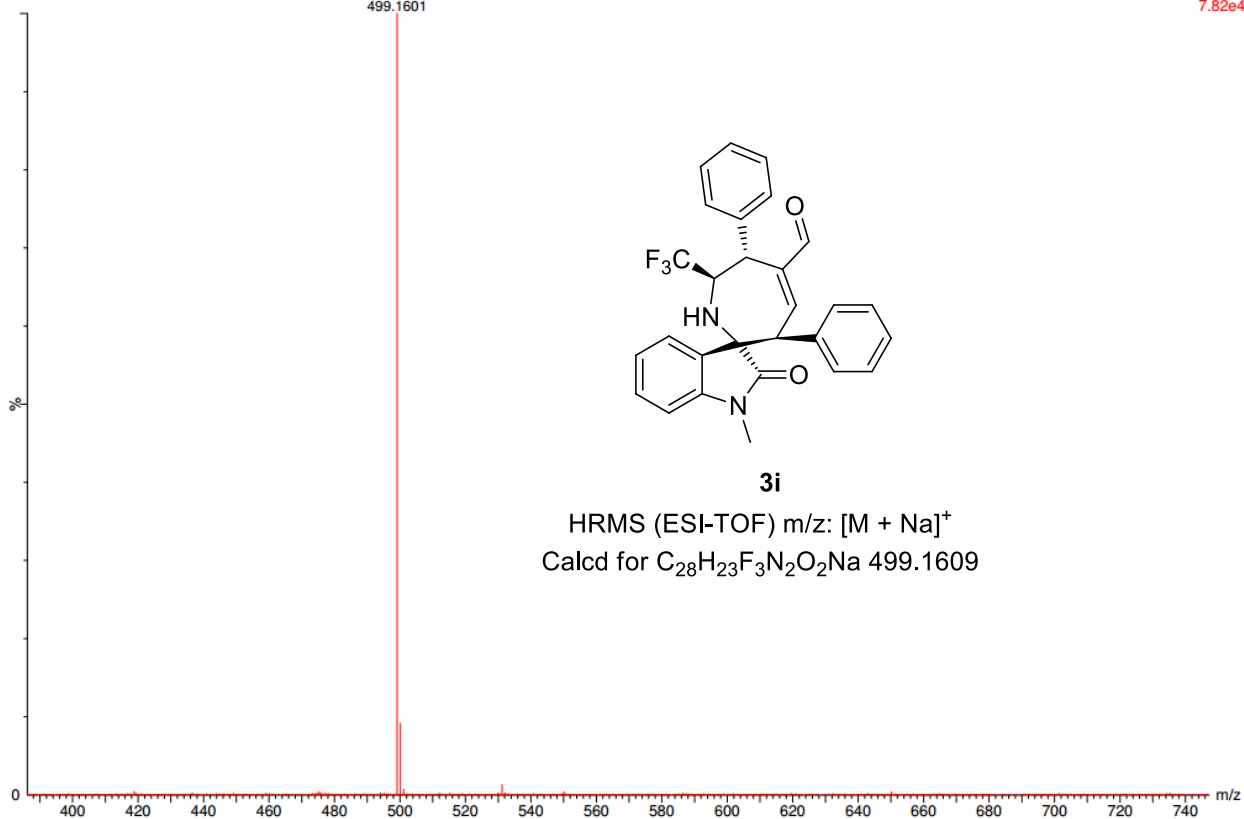

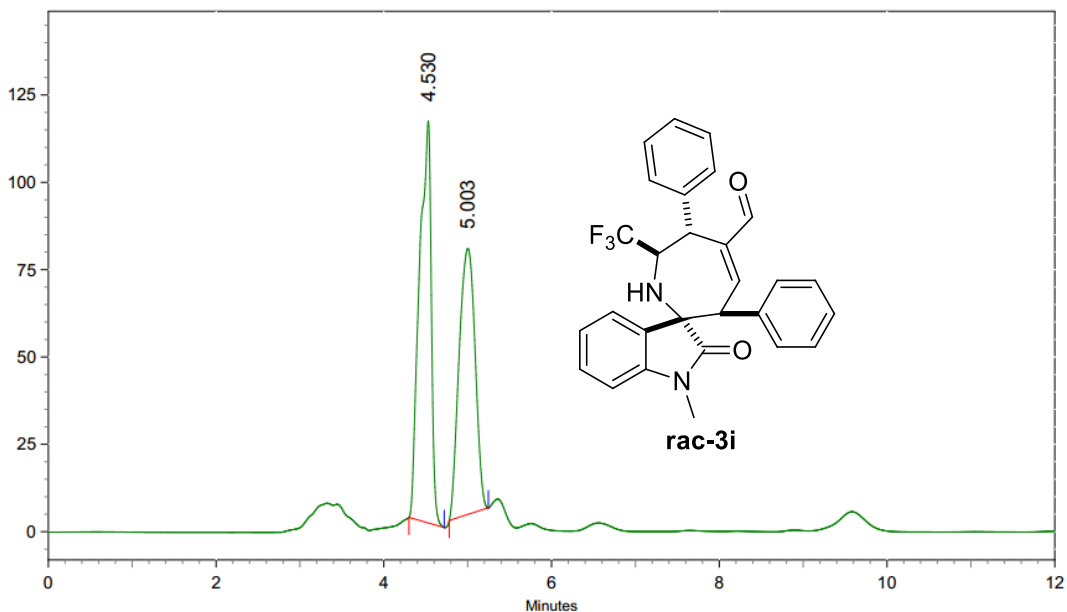

**AREA PERCENT REPORT**

| Peak No. | Ret Time | Width | Height  | Area     | Area [%] |
|----------|----------|-------|---------|----------|----------|
| 1        | 4.530    | 0.420 | 1930576 | 18780875 | 52.5026  |
| 2        | 5.003    | 0.467 | 1276887 | 16990450 | 47.4974  |

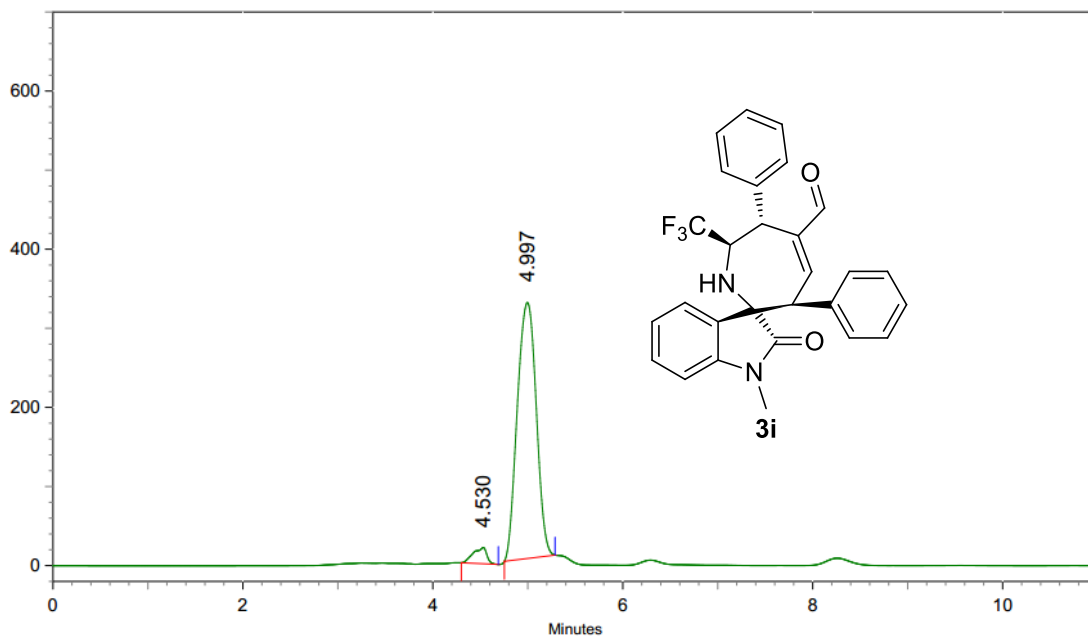

**AREA PERCENT REPORT**

| Peak No. | Ret Time | Width | Height  | Area     | Area [%] |
|----------|----------|-------|---------|----------|----------|
| 1        | 4.530    | 0.390 | 342402  | 3382765  | 4.2997   |
| 2        | 4.997    | 0.533 | 5428105 | 75292217 | 95.7003  |

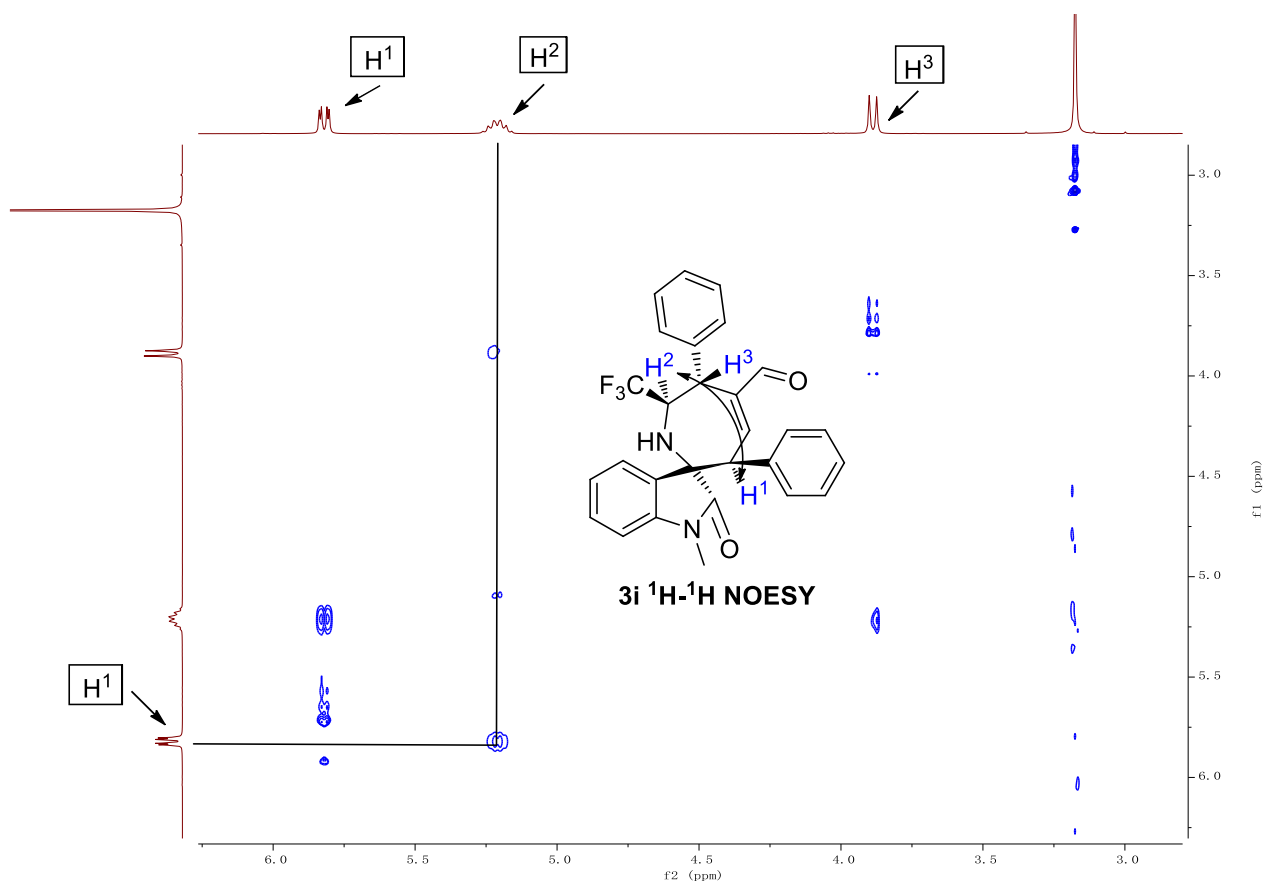

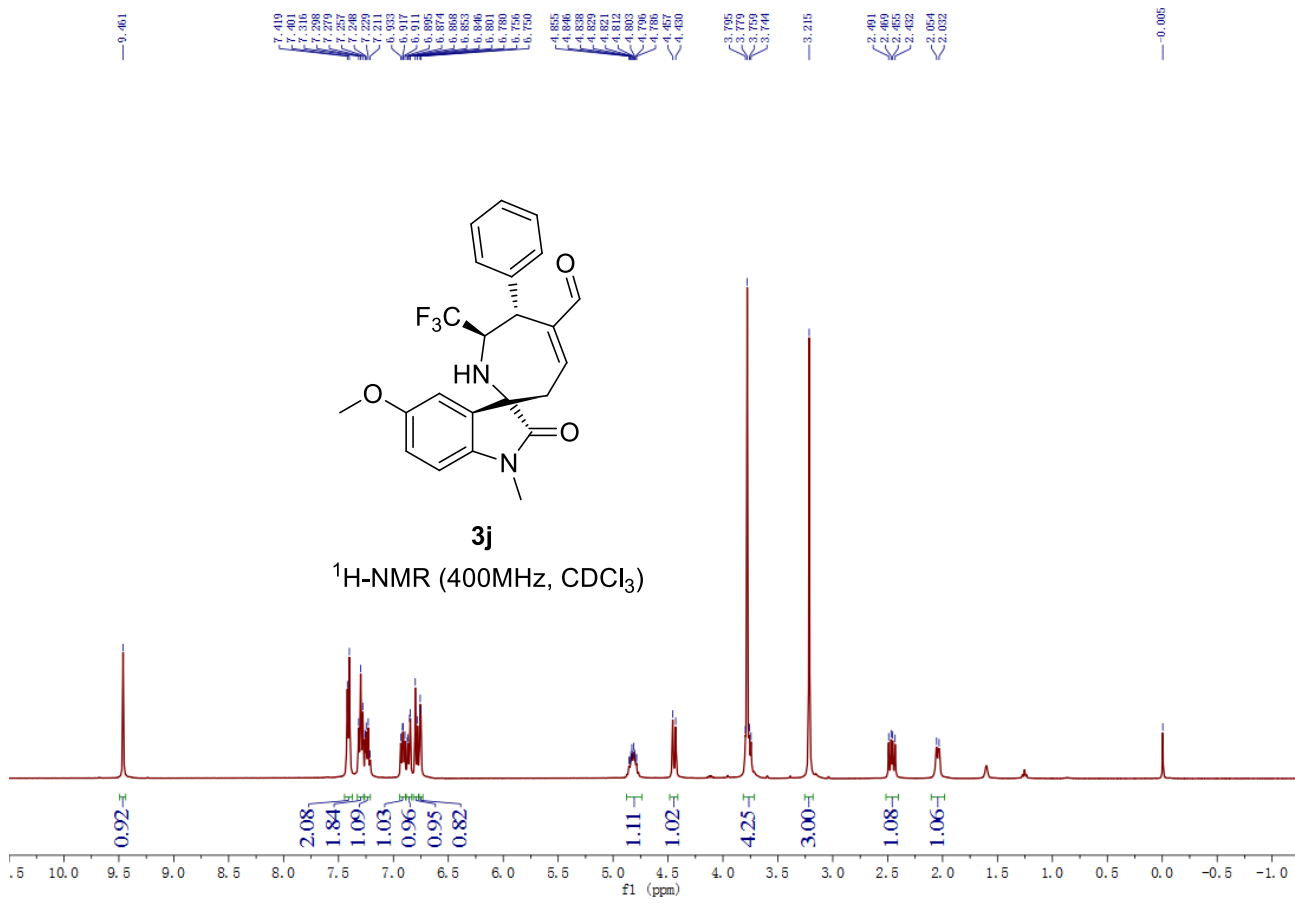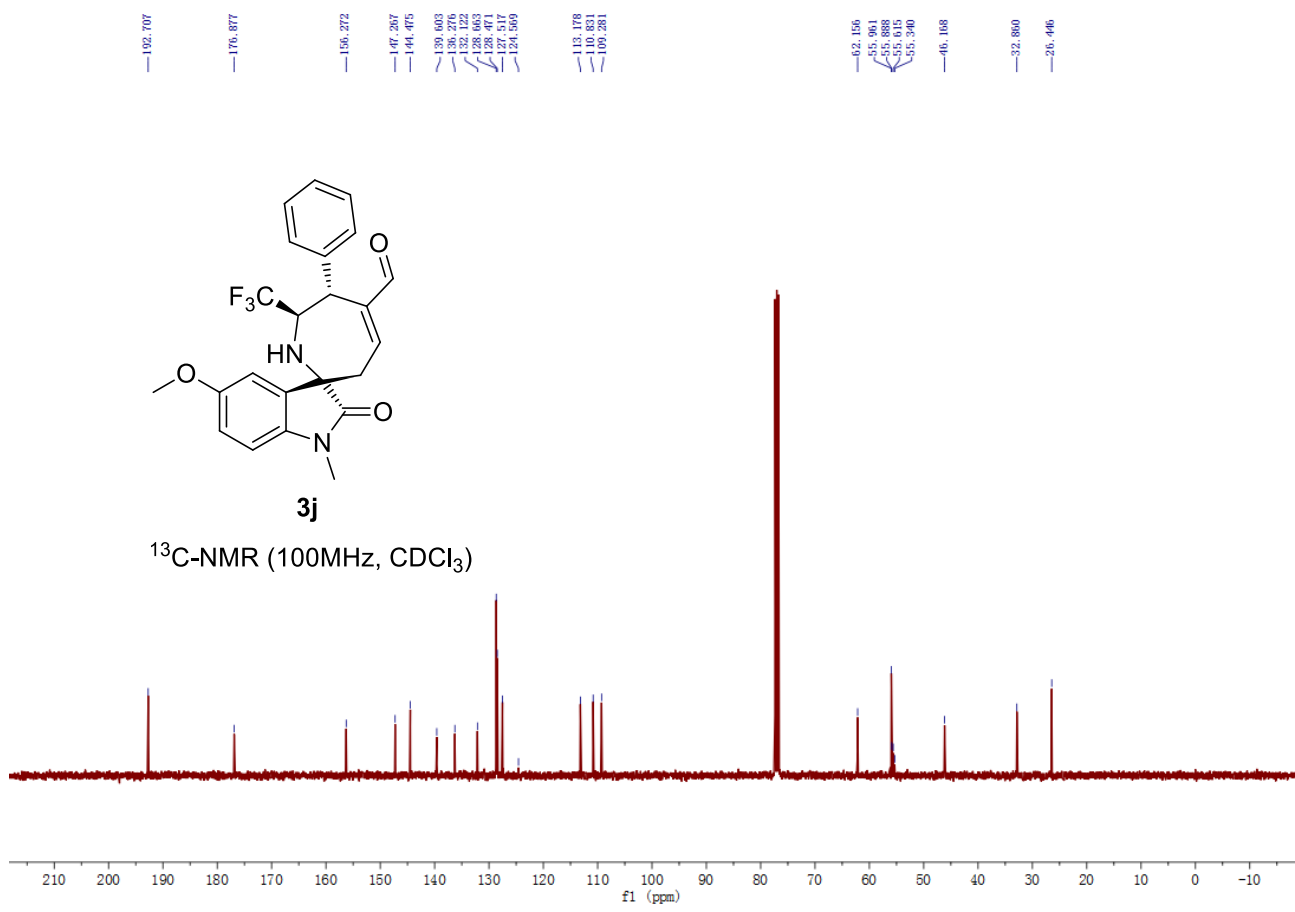

74.021

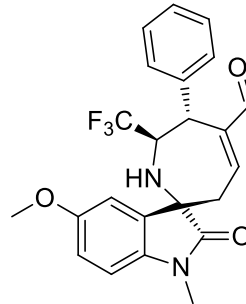

<sup>19</sup>F-NMR (376MHz, CDCl<sub>3</sub>)

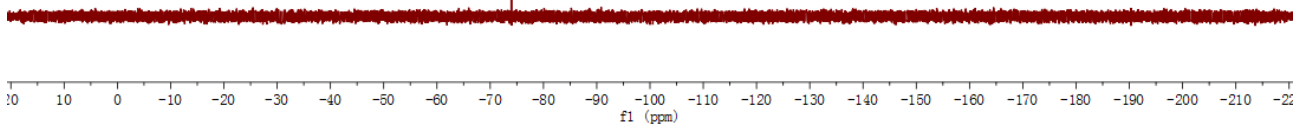

### Spectrum Plot Report

Agilent | TruTest Answers

| Name           | CYC-20191124-15   | Rack Pos.    | Instrument | Instrument 1 | Operator                         |
|----------------|-------------------|--------------|------------|--------------|----------------------------------|
| Inj. Vol. (ul) | 10                | Plate Pos.   | IRM Status | Success      |                                  |
| Data File      | CYC-20191124-15.d | Method (Acq) | TOF.m      | Comment      | Acq. Time (Local)                |
|                |                   |              |            |              | 12/5/2019 5:15:28 PM (UTC+08:00) |

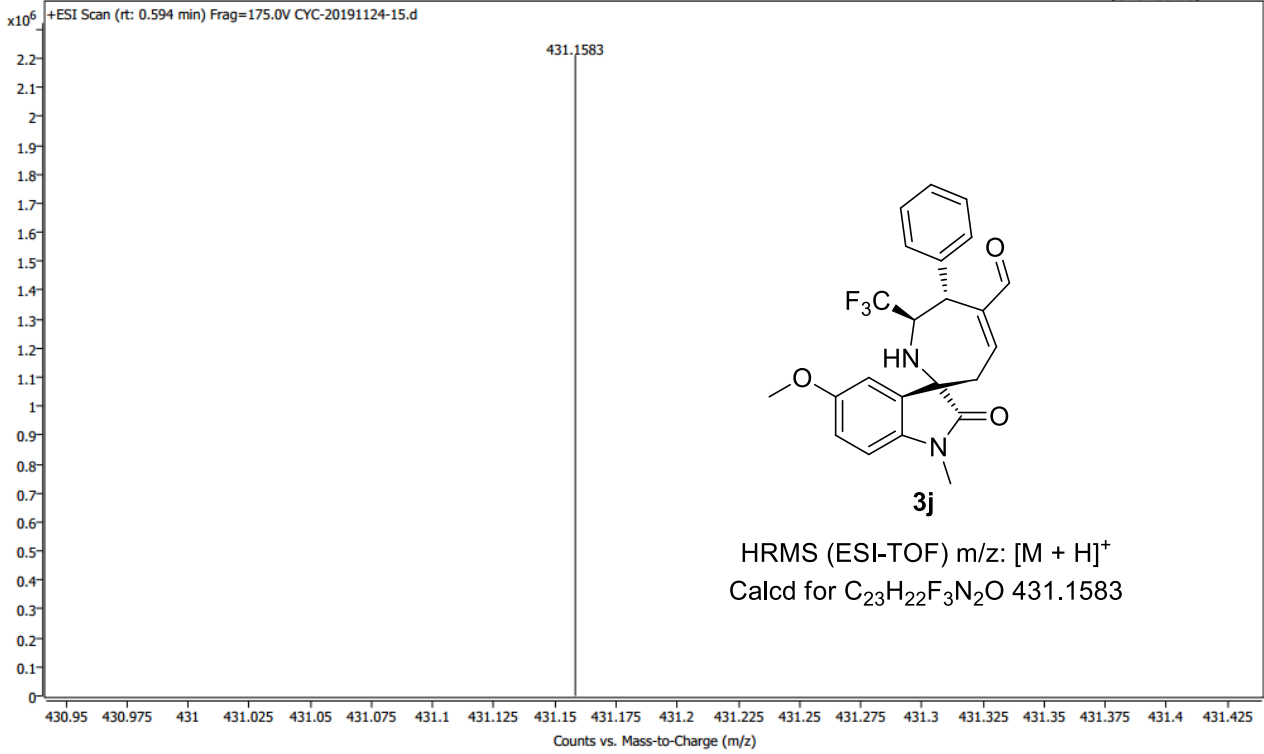



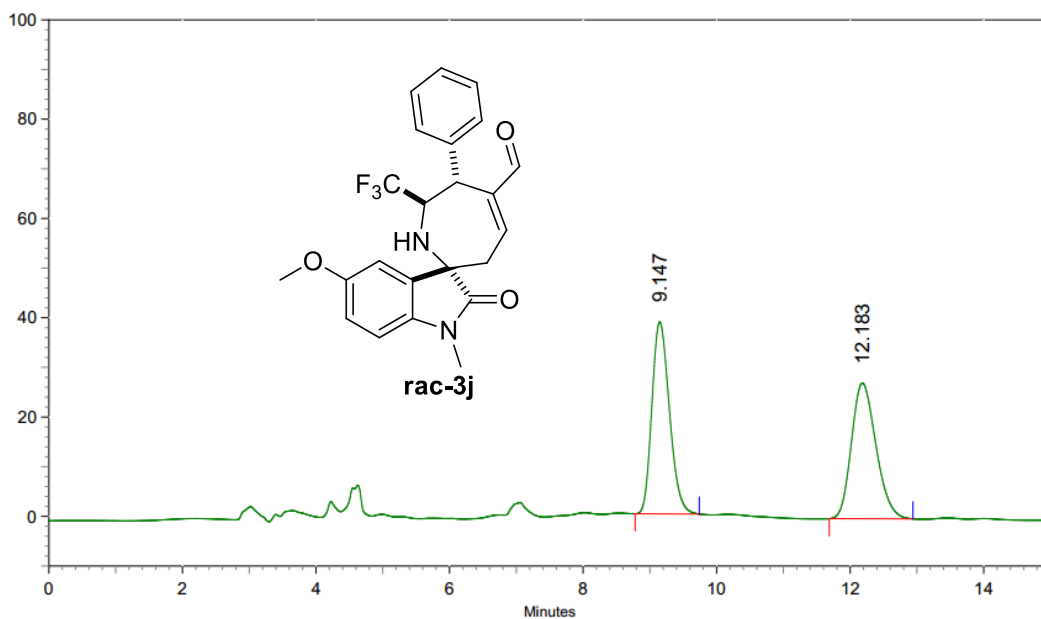

**AREA PERCENT REPORT**

| Peak No. | Ret Time | Width | Height | Area     | Area [%] |
|----------|----------|-------|--------|----------|----------|
| 1        | 9.147    | 0.960 | 648668 | 11841980 | 50.2999  |
| 2        | 12.183   | 1.253 | 458651 | 11700755 | 49.7001  |

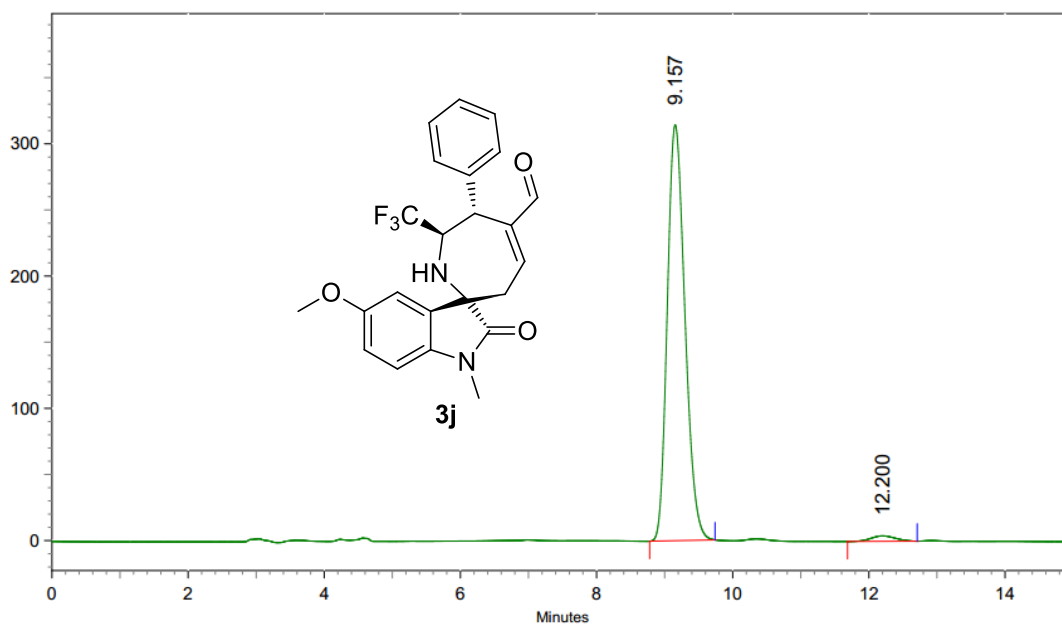

**AREA PERCENT REPORT**

| Peak No. | Ret Time | Width | Height  | Area     | Area [%] |
|----------|----------|-------|---------|----------|----------|
| 1        | 9.157    | 0.960 | 5274313 | 94870112 | 98.2319  |
| 2        | 12.200   | 1.023 | 69022   | 1707616  | 1.7681   |

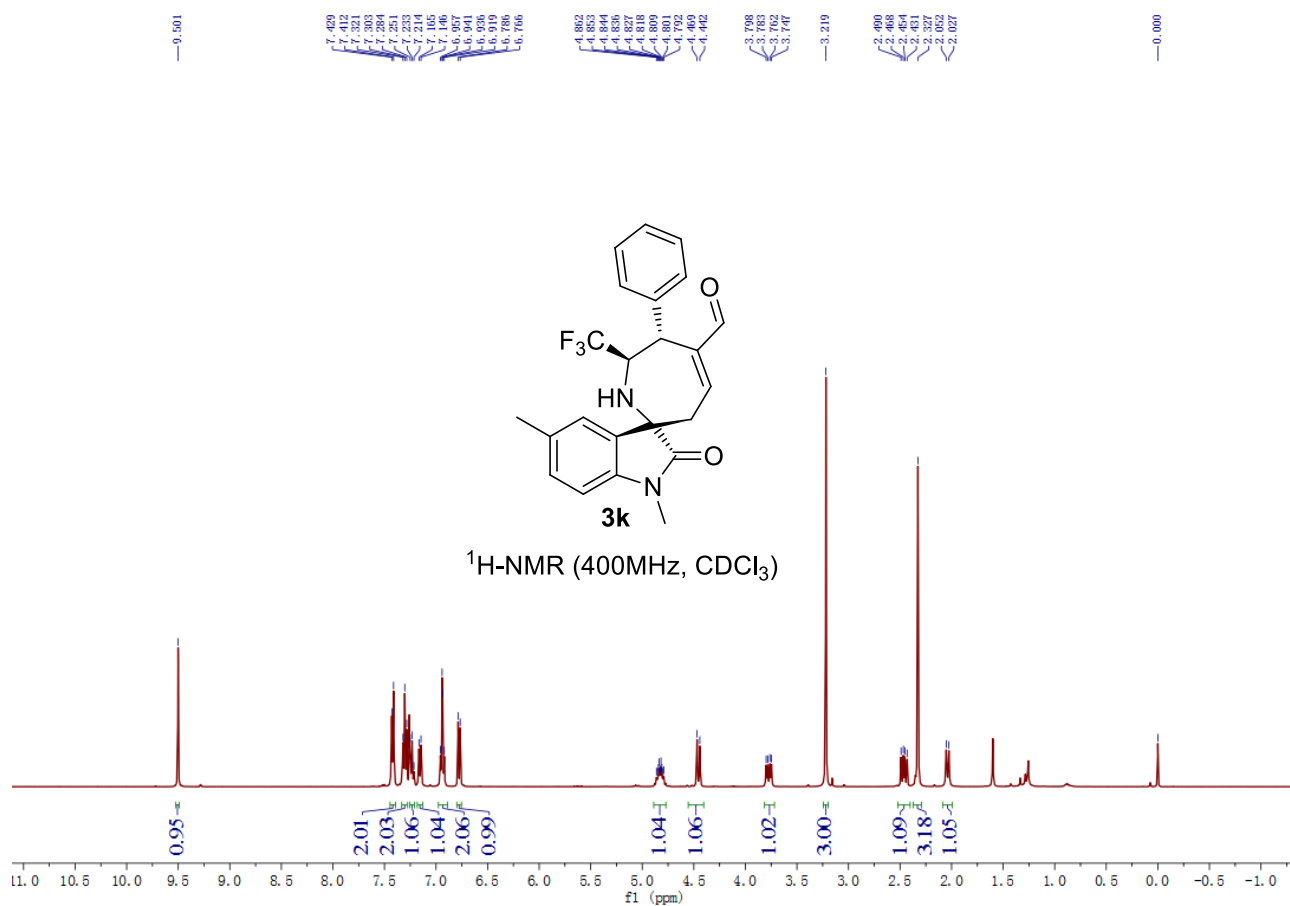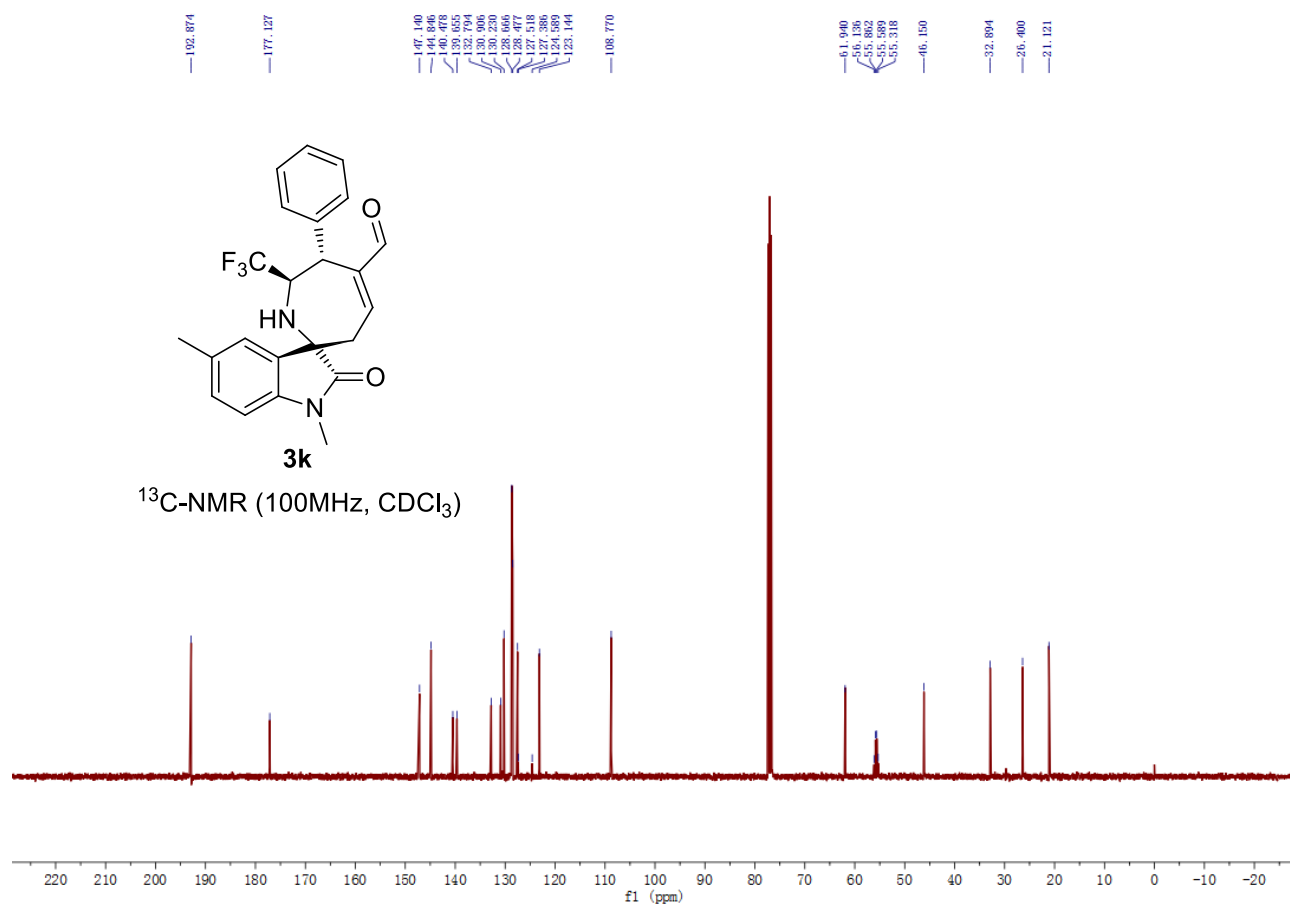

-71.088

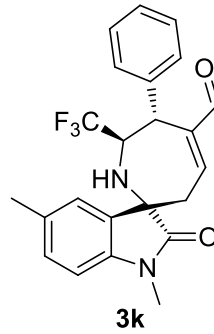

$^{19}\text{F}$ -NMR (376MHz,  $\text{CDCl}_3$ )

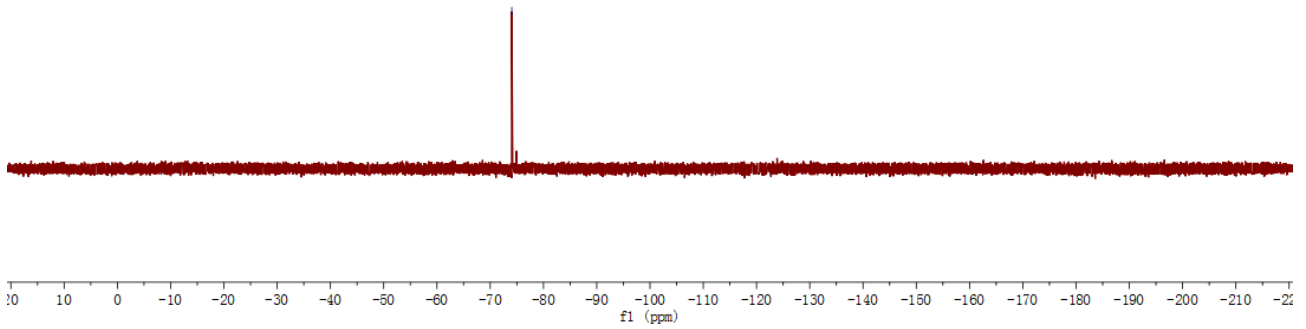

### Spectrum Plot Report

Agilent | Trusted Answers

| Name           | CYC-20191124-14   | Rack Pos.    | Instrument | Instrument 1 | Operator                         |
|----------------|-------------------|--------------|------------|--------------|----------------------------------|
| Inj. Vol. (ul) | 10                | Plate Pos.   | IRM Status | Success      |                                  |
| Data File      | CYC-20191124-14.d | Method (Acq) | TOF.m      | Comment      | Acq. Time (Local)                |
|                |                   |              |            |              | 12/5/2019 5:12:27 PM (UTC+08:00) |

+ESI Scan (rt: 0.682 min) Frag=175.0V CYC-20191124-14.d

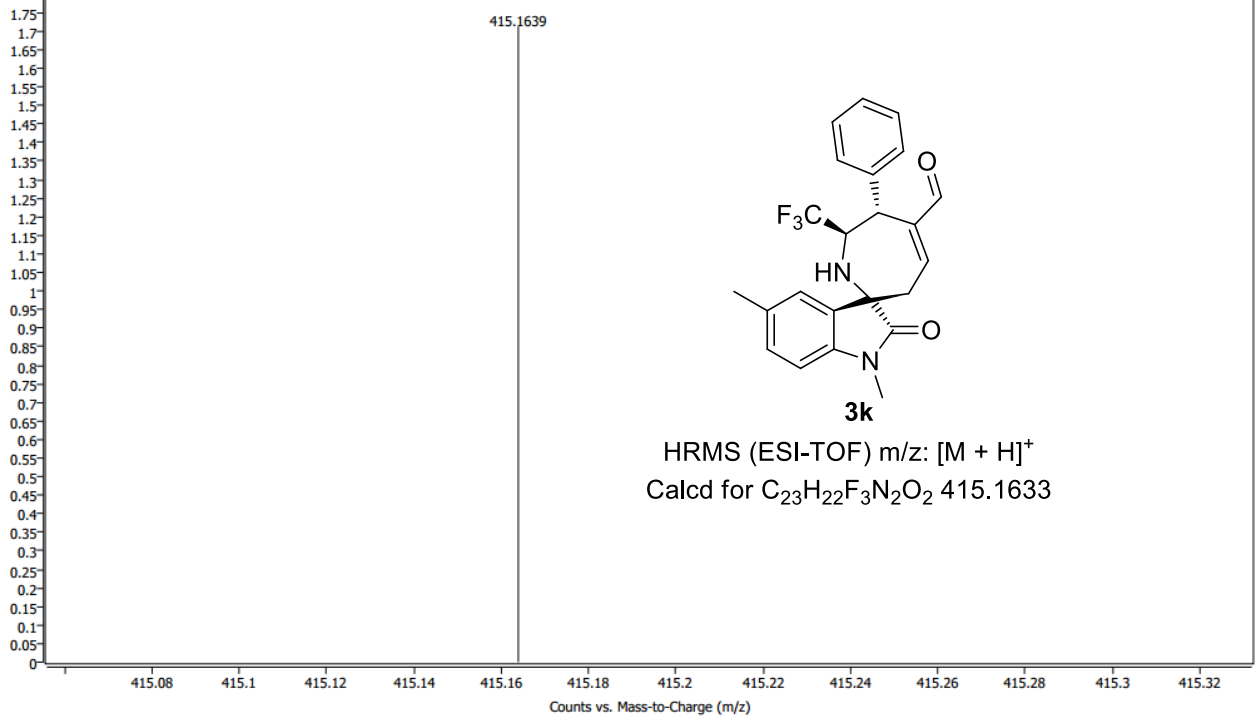

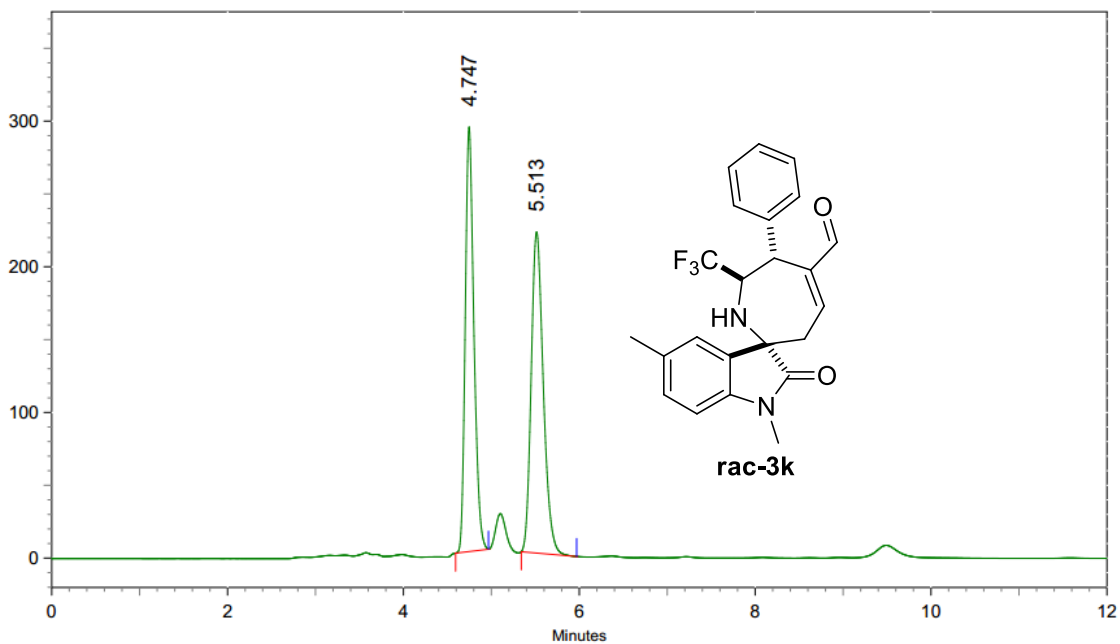

### AREA PERCENT REPORT

| Peak No. | Ret Time | Width | Height  | Area     | Area [%] |
|----------|----------|-------|---------|----------|----------|
| 1        | 4.747    | 0.373 | 4891148 | 33331364 | 48.5124  |
| 2        | 5.513    | 0.630 | 3697894 | 35375590 | 51.4876  |

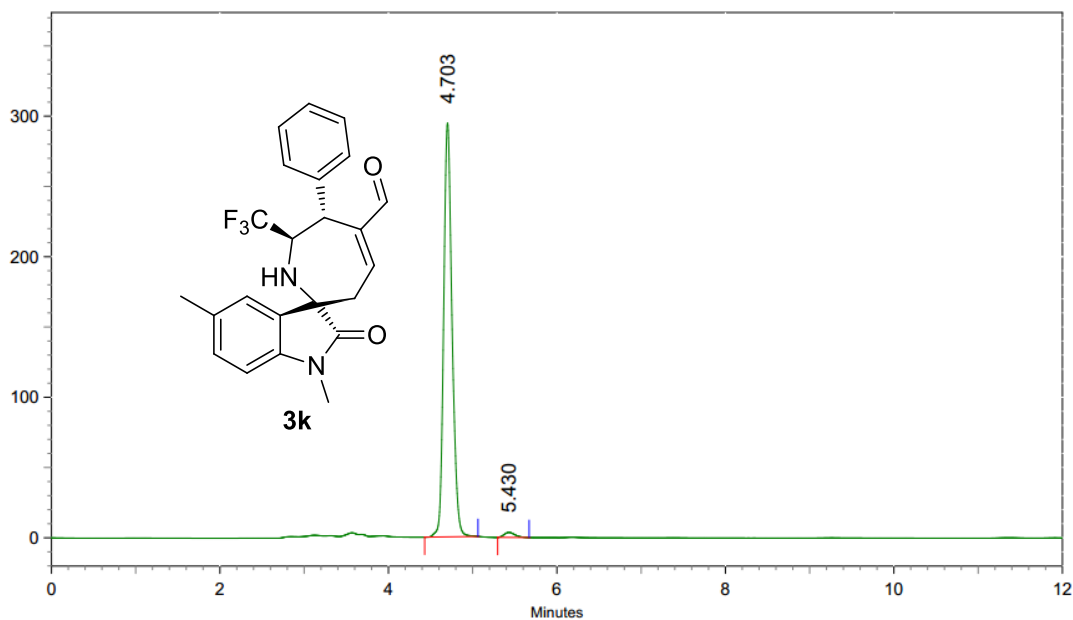

### AREA PERCENT REPORT

| Peak No. | Ret Time | Width | Height  | Area     | Area [%] |
|----------|----------|-------|---------|----------|----------|
| 1        | 4.703    | 0.633 | 4938617 | 34028702 | 98.4496  |
| 2        | 5.430    | 0.373 | 60399   | 535901   | 1.5504   |

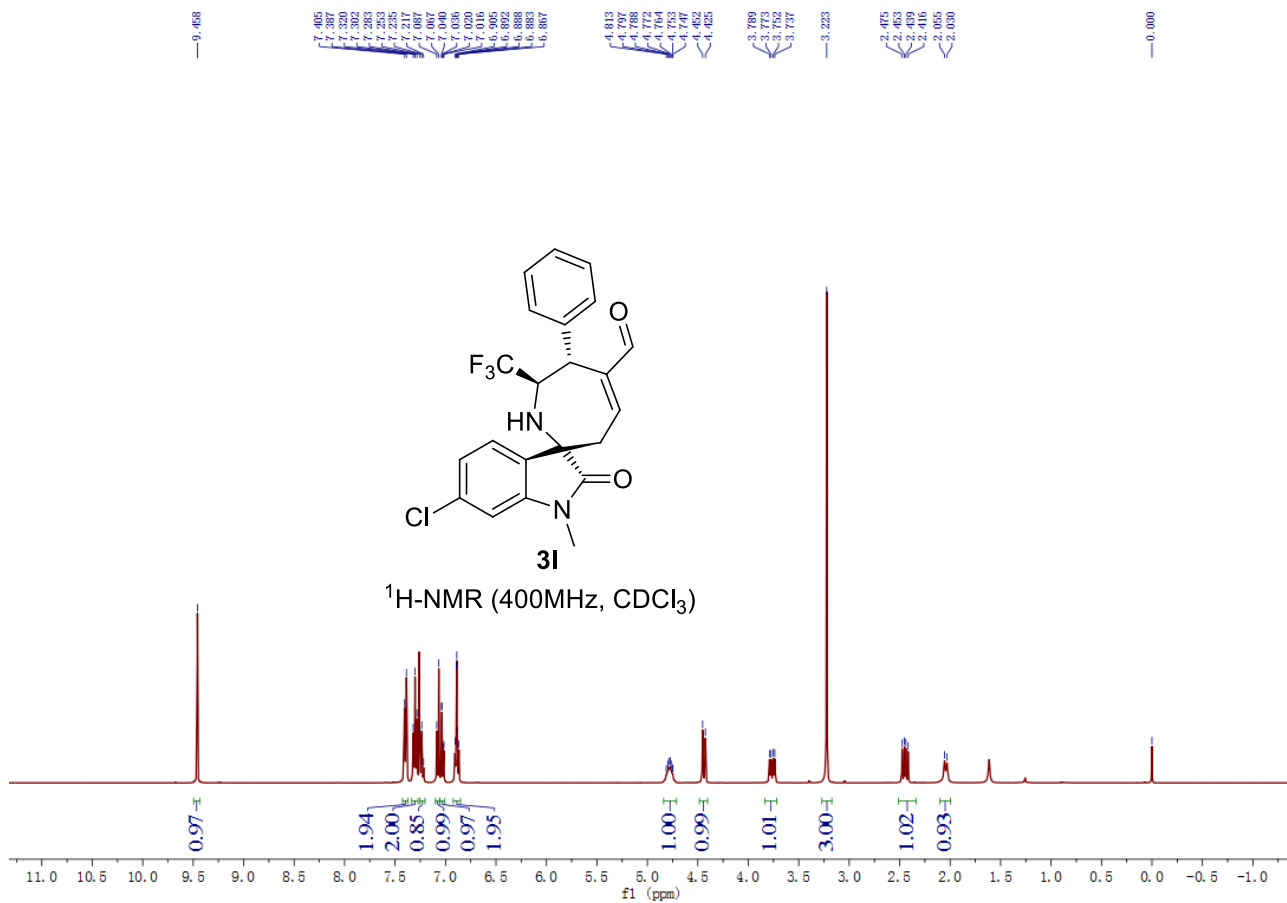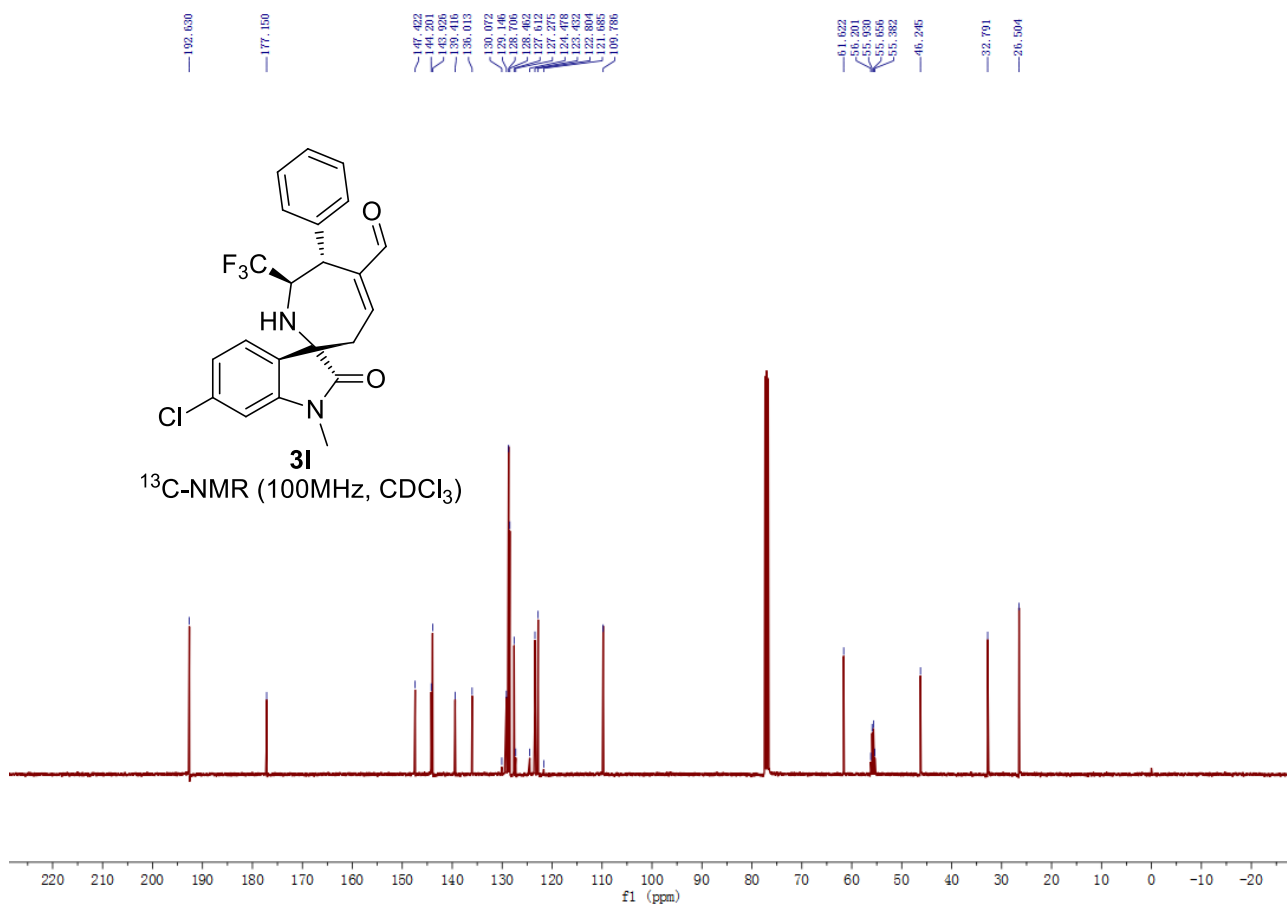

-73.977

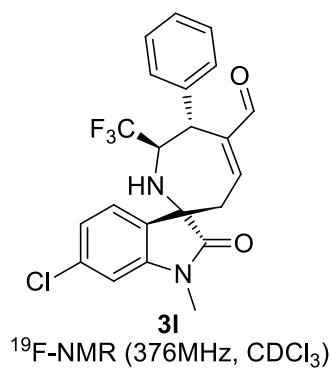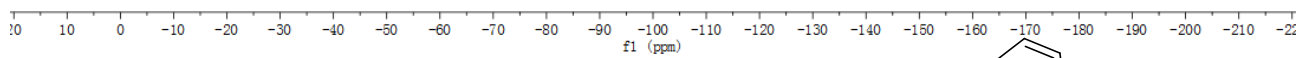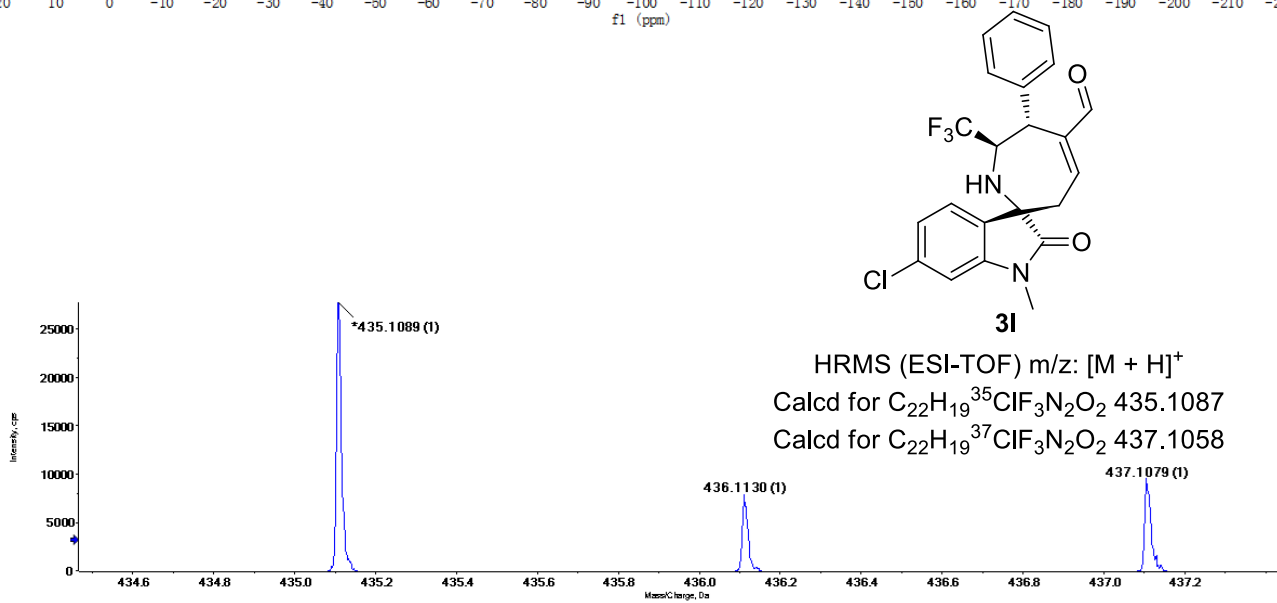

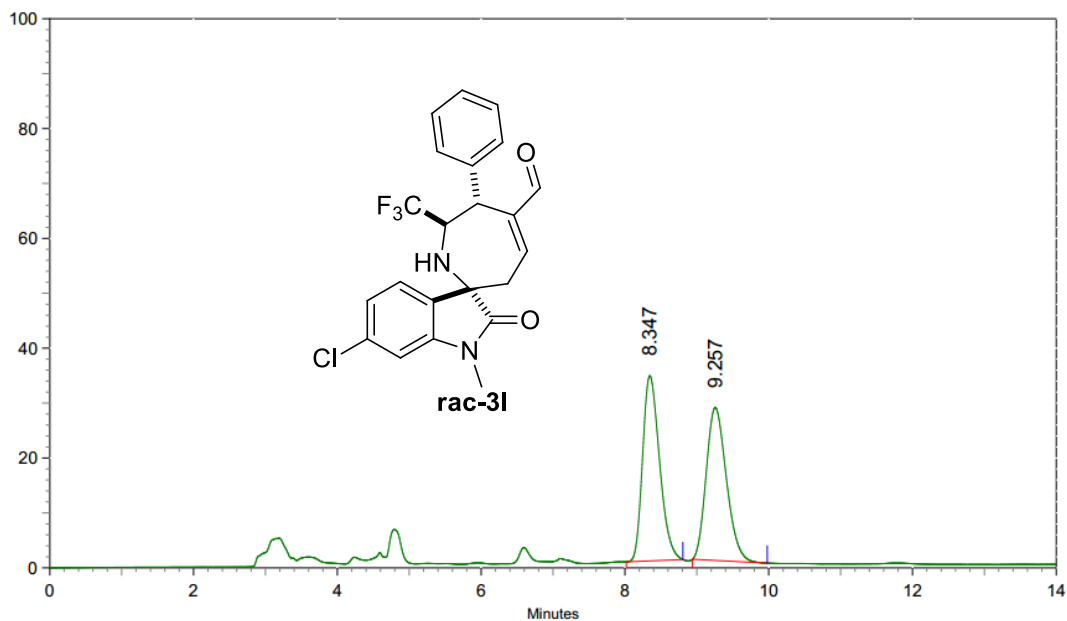

**AREA PERCENT REPORT**

| Peak No. | Ret Time | Width | Height | Area    | Area [%] |
|----------|----------|-------|--------|---------|----------|
| 1        | 8.347    | 0.787 | 565885 | 9260058 | 50.3627  |
| 2        | 9.257    | 1.040 | 467158 | 9126689 | 49.6373  |

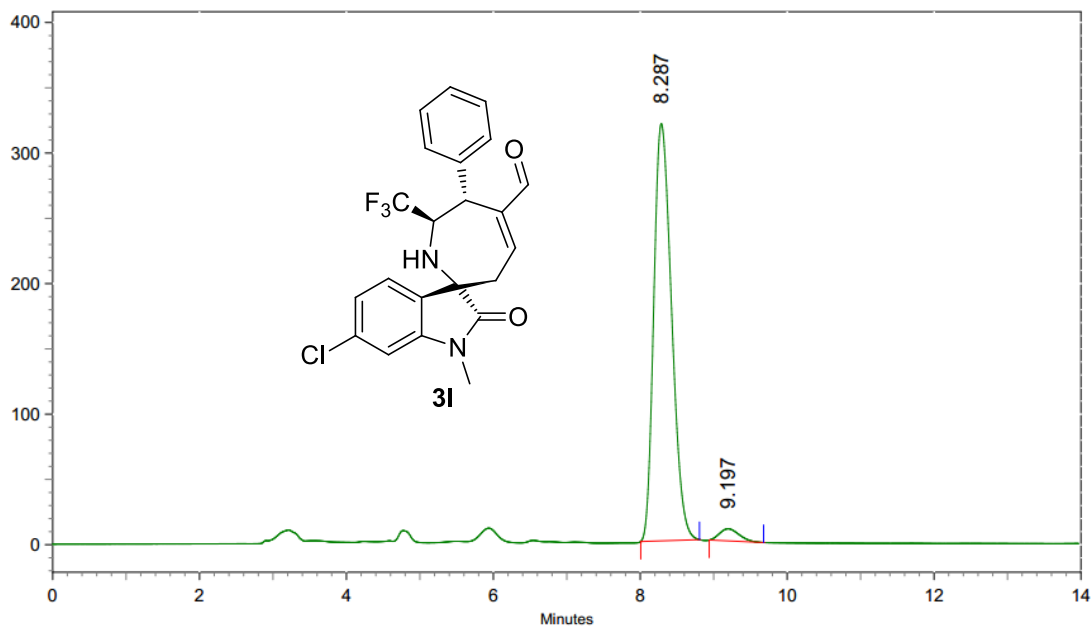

**AREA PERCENT REPORT**

| Peak No. | Ret Time | Width | Height  | Area     | Area [%] |
|----------|----------|-------|---------|----------|----------|
| 1        | 8.287    | 0.800 | 5361022 | 90034511 | 96.8980  |
| 2        | 9.197    | 0.740 | 155581  | 2882304  | 3.1020   |

9.467  
7.913  
7.322  
7.305  
7.286  
7.277  
7.219  
7.121  
7.118  
7.083  
7.097  
7.093  
7.089  
7.072  
7.072  
7.010  
6.992  
6.982  
6.971  
6.955  
6.952  
6.934  
6.934  
6.912  
6.889  
6.889  
6.834  
4.825  
4.817  
4.805  
4.799  
4.790  
4.782  
4.773  
4.661  
4.434  
3.793  
3.778  
3.756  
3.741  
3.461  
3.464  
2.511  
2.489  
2.474  
2.462  
2.051  
2.035  
-0.000

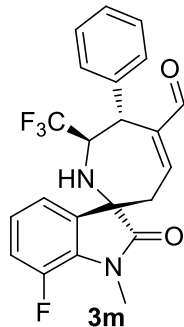

<sup>1</sup>H-NMR (400MHz, CDCl<sub>3</sub>)

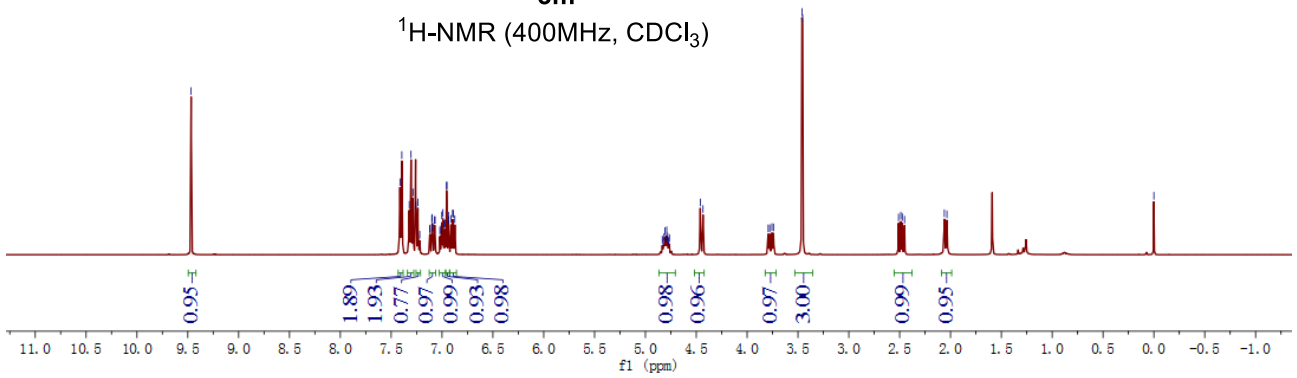

192.638  
176.788  
148.230  
146.375  
146.375  
146.061  
139.447  
133.000  
133.000  
130.079  
129.719  
129.654  
128.795  
128.795  
127.598  
127.275  
124.478  
123.873  
121.675  
118.285  
118.247  
118.090  
61.906  
55.080  
55.532  
55.286  
46.174  
32.876  
28.853

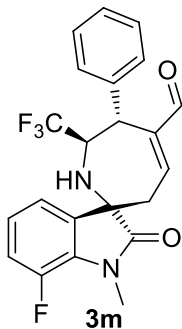

<sup>13</sup>C-NMR (100MHz, CDCl<sub>3</sub>)

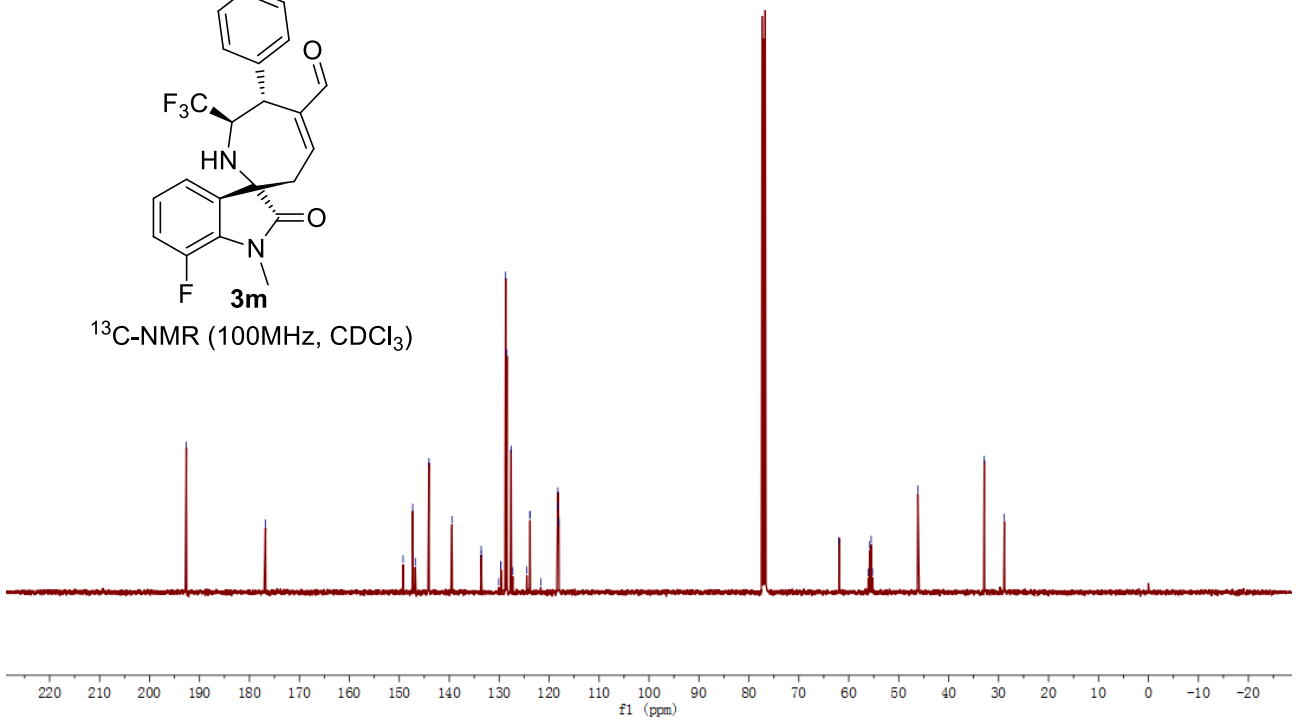



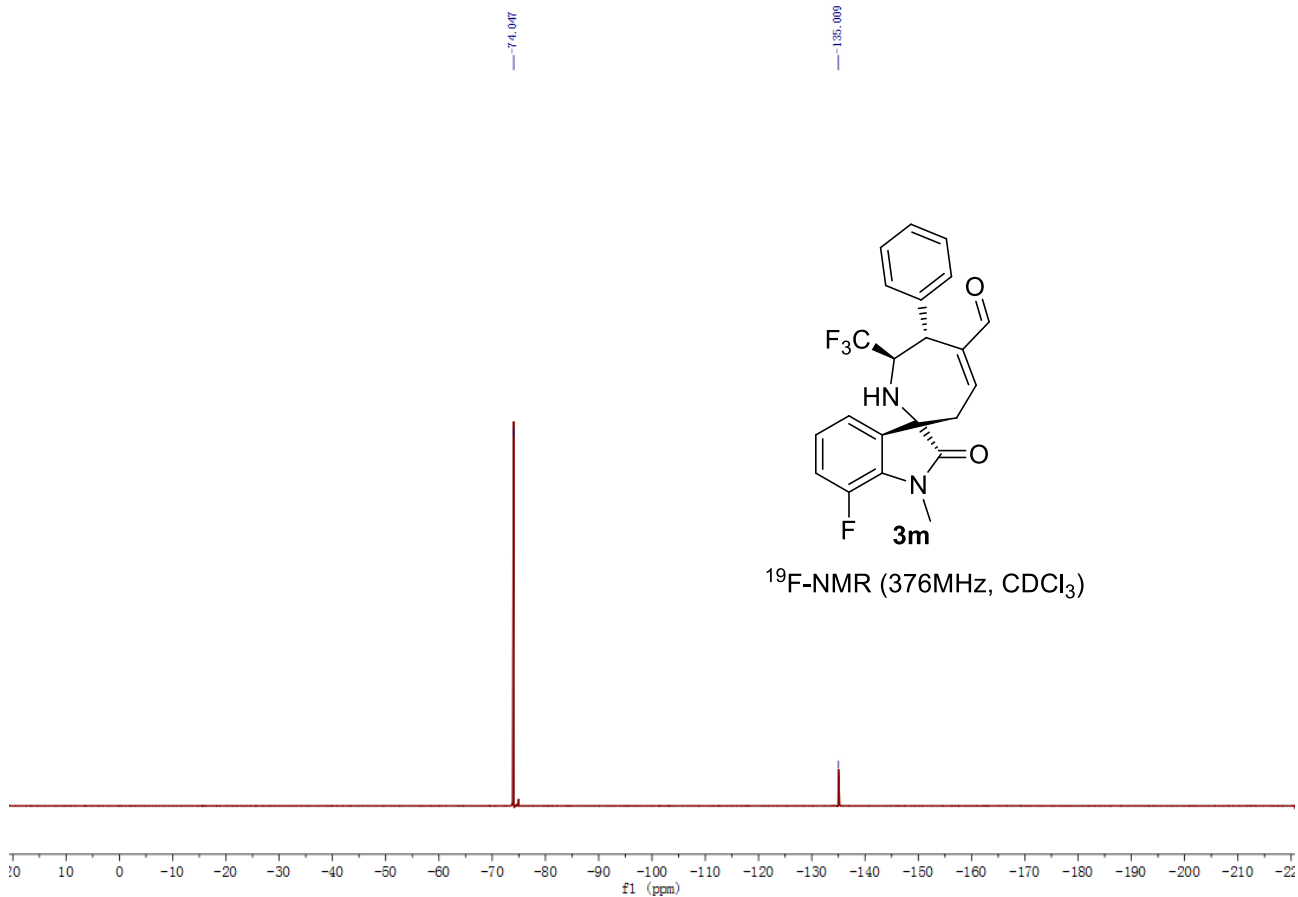

## Spectrum Plot Report

Agilent | Trusted Answers

| Name           | CYC-20191124-12   | Rack Pos.    | Instrument | Instrument 1 | Operator                         |
|----------------|-------------------|--------------|------------|--------------|----------------------------------|
| Inj. Vol. (ul) | 10                | Plate Pos.   | IRM Status | Success      |                                  |
| Data File      | CYC-20191124-12.d | Method (Acq) | TOF.m      | Comment      | Acq. Time (Local)                |
|                |                   |              |            |              | 12/5/2019 5:06:25 PM (UTC+08:00) |

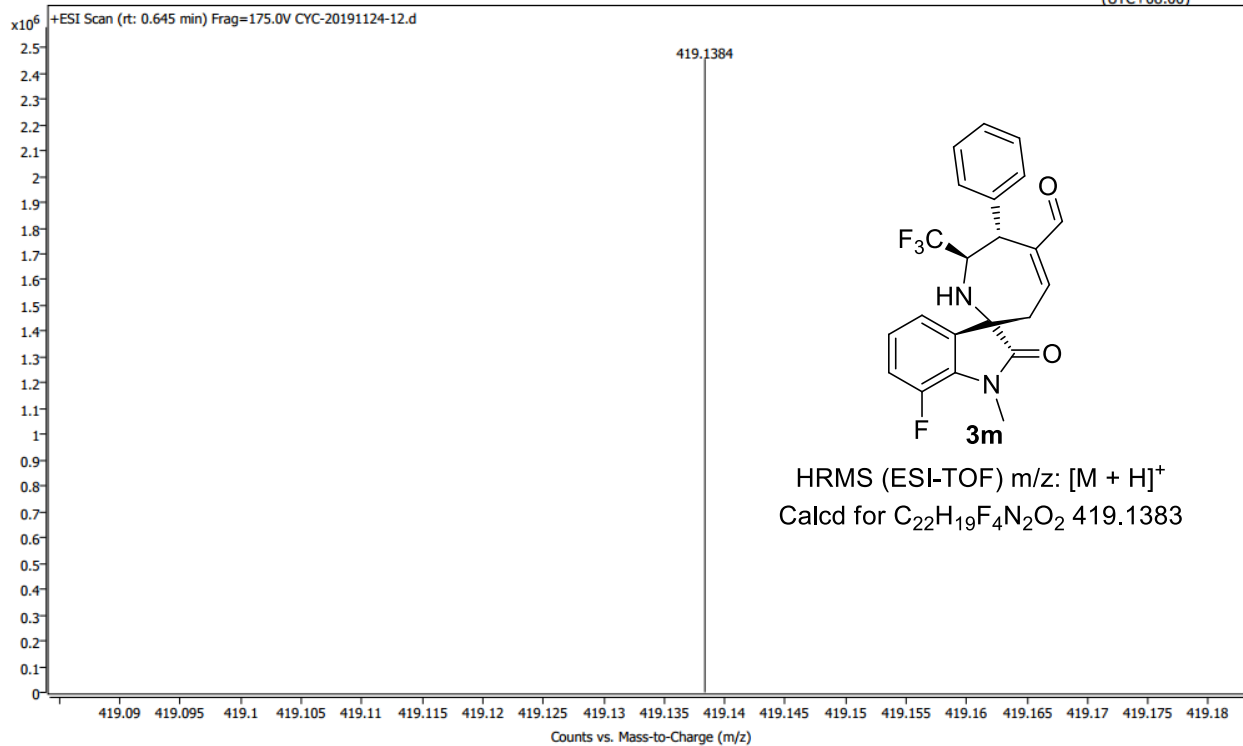

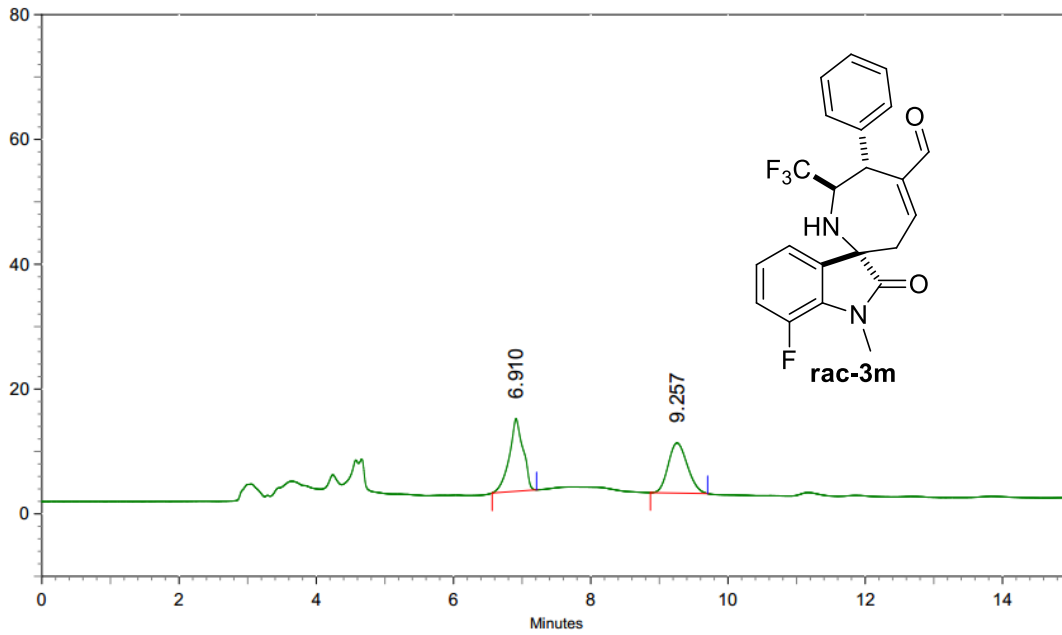

**AREA PERCENT REPORT**

| Peak No. | Ret Time | Width | Height | Area    | Area [%] |
|----------|----------|-------|--------|---------|----------|
| 1        | 6.910    | 0.647 | 194790 | 2717854 | 50.9807  |
| 2        | 9.257    | 0.833 | 134753 | 2613284 | 49.0193  |

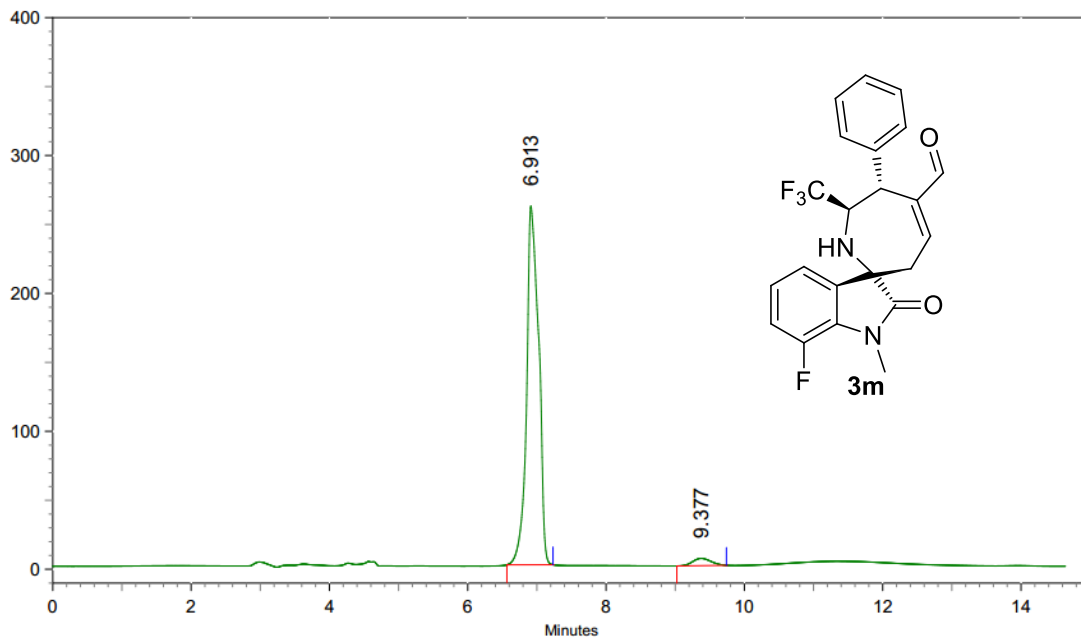

**AREA PERCENT REPORT**

| Peak No. | Ret Time | Width | Height  | Area     | Area [%] |
|----------|----------|-------|---------|----------|----------|
| 1        | 6.913    | 0.667 | 4363296 | 52819314 | 97.0171  |
| 2        | 9.377    | 0.717 | 88622   | 1623985  | 2.9829   |

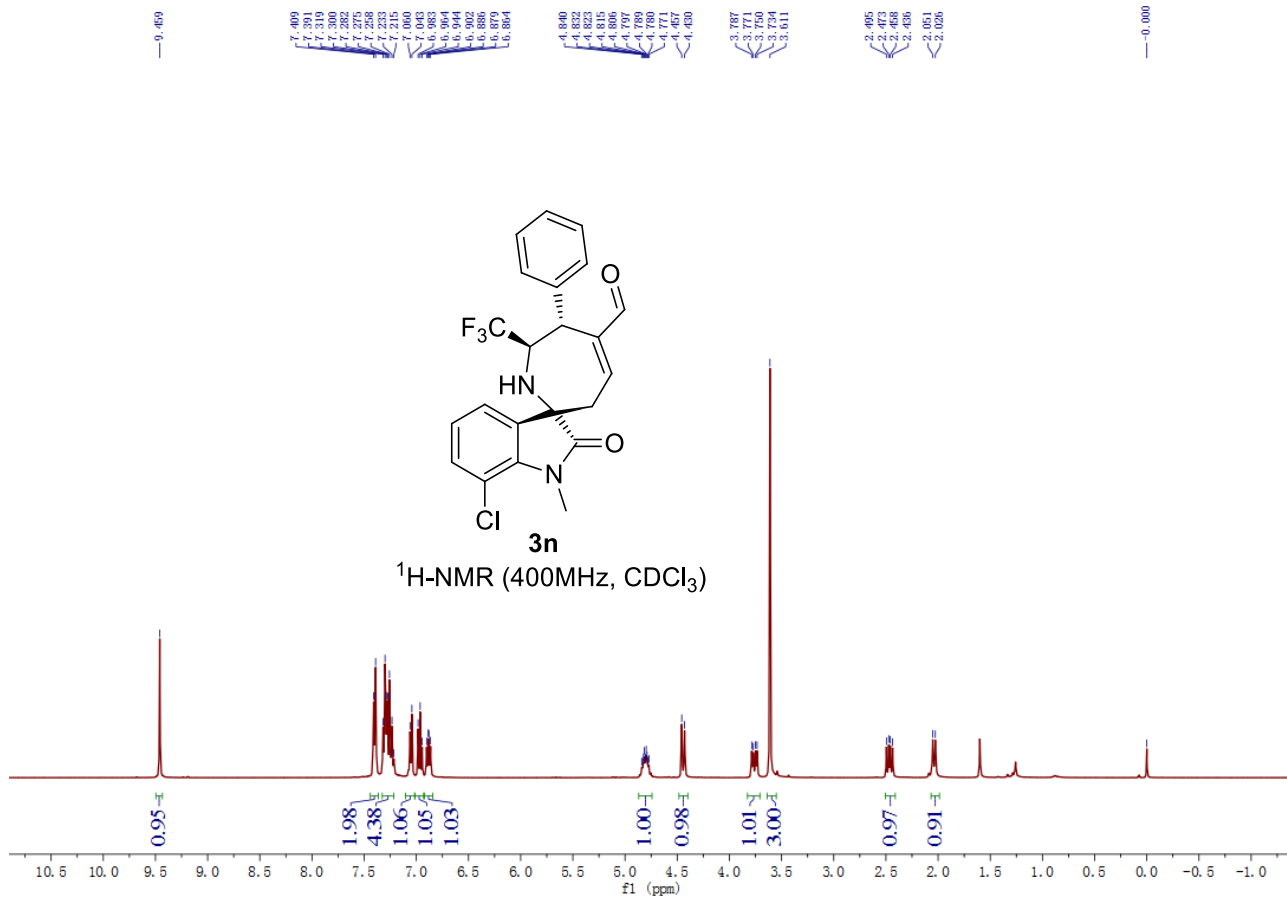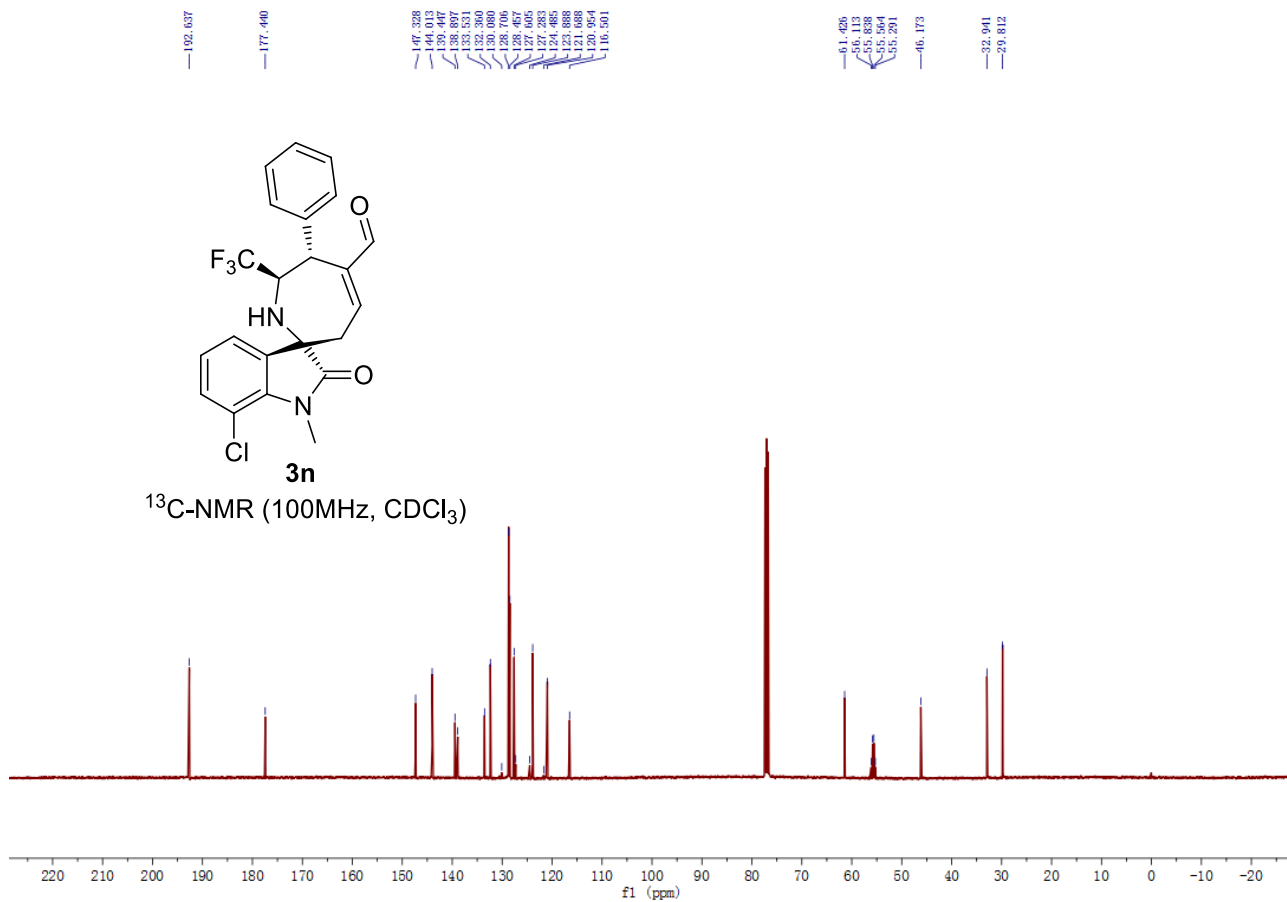

-71.080

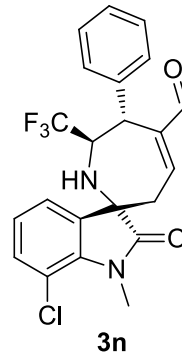

$^{19}\text{F}$ -NMR (376MHz,  $\text{CDCl}_3$ )



### Spectrum Plot Report

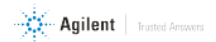

| Name           | CYC-20200105-47   | Rack Pos.    | Instrument | Instrument 1 | Operator                         |
|----------------|-------------------|--------------|------------|--------------|----------------------------------|
| Inj. Vol. (ul) | 10                | Plate Pos.   | IRM Status | Success      |                                  |
| Data File      | CYC-20200105-47.d | Method (Acq) | TOF.m      | Comment      | Acq. Time (Local)                |
|                |                   |              |            |              | 1/10/2020 8:57:53 PM (UTC+08:00) |

+ESI Scan (rt: 0.735 min) Frag=175.0V CYC-20200105-47.d

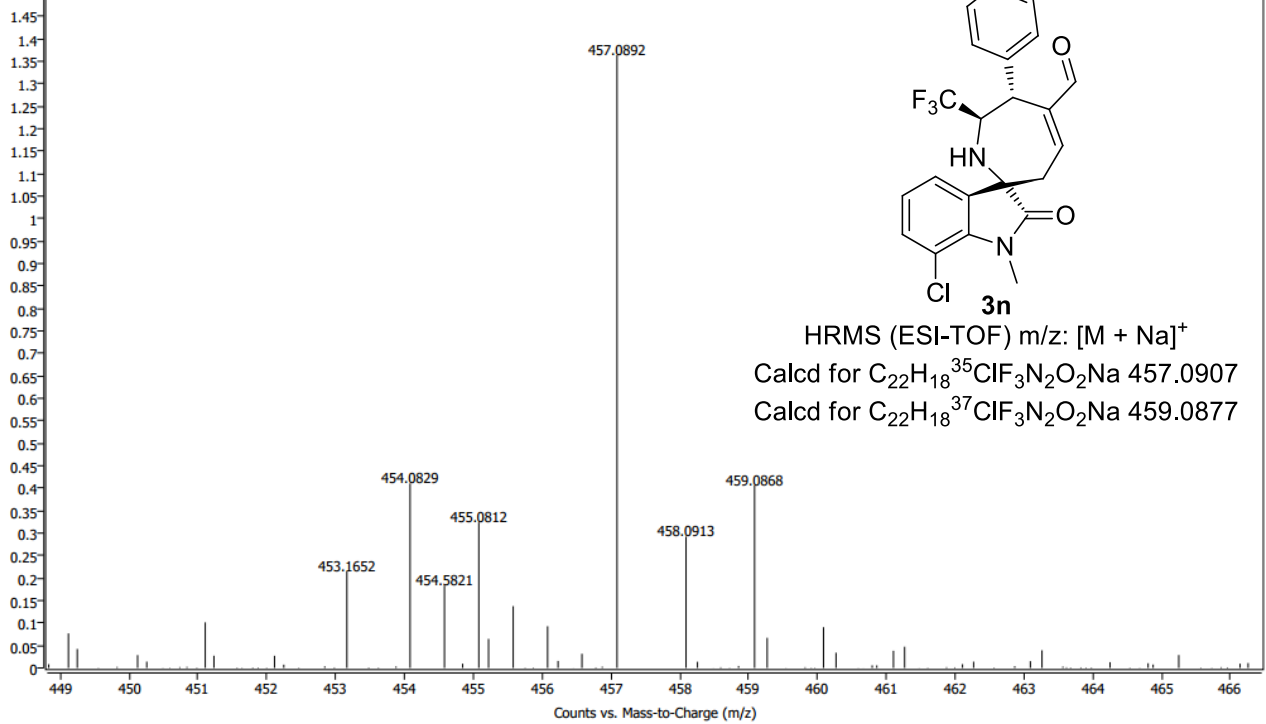

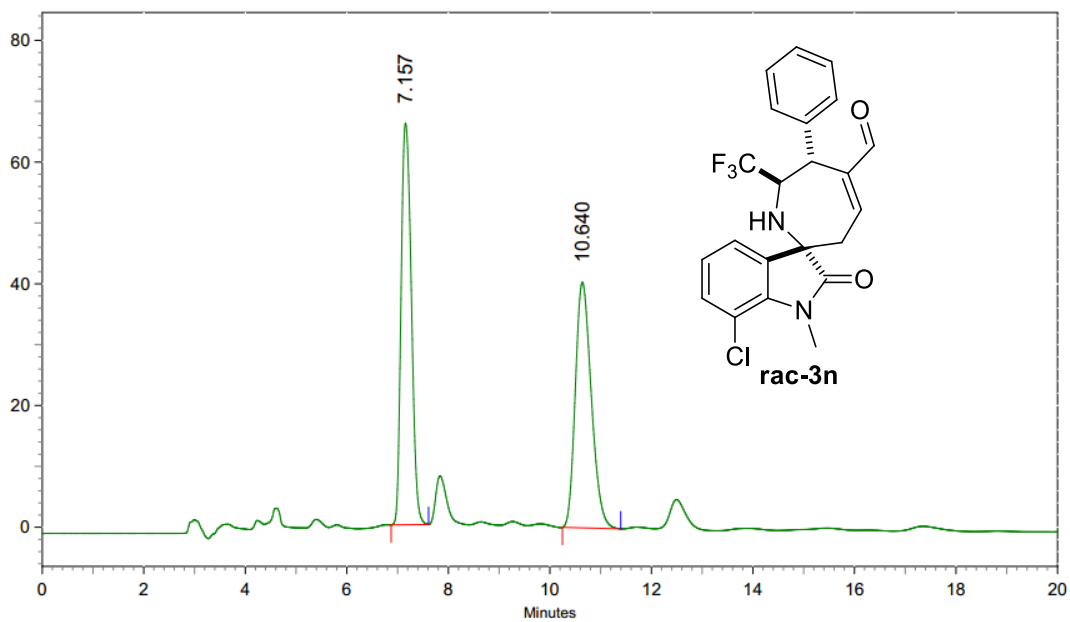

AREA PERCENT REPORT

| Peak No. | Ret Time | Width | Height  | Area     | Area [%] |
|----------|----------|-------|---------|----------|----------|
| 1        | 7.157    | 0.737 | 1106715 | 15458011 | 51.0955  |
| 2        | 10.640   | 1.150 | 676884  | 14795167 | 48.9045  |

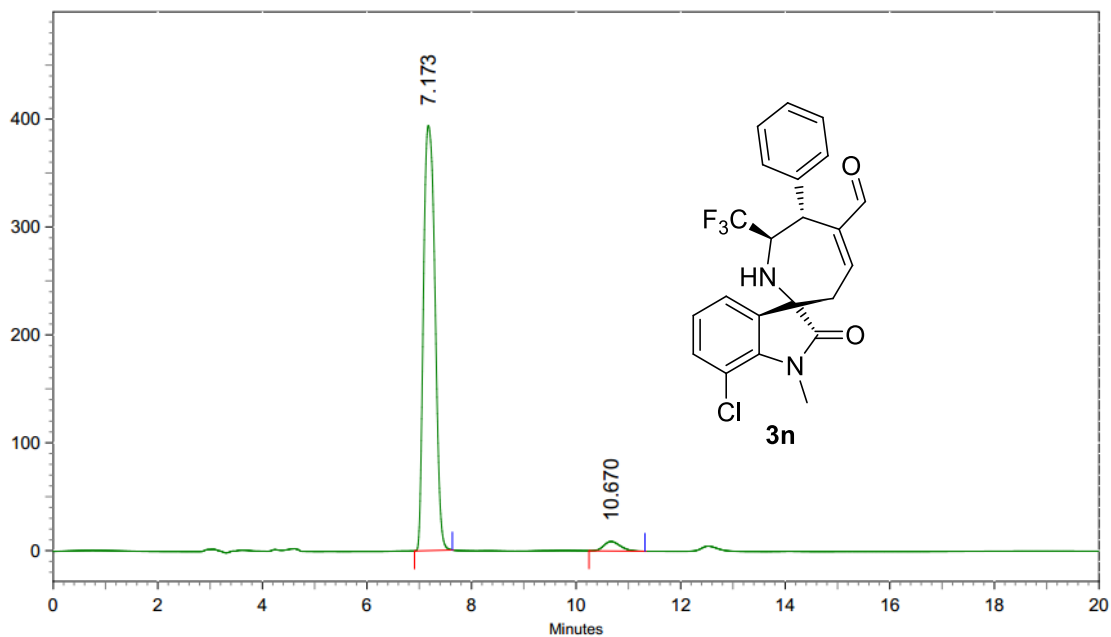

AREA PERCENT REPORT

| Peak No. | Ret Time | Width | Height  | Area      | Area [%] |
|----------|----------|-------|---------|-----------|----------|
| 1        | 7.173    | 0.723 | 6607631 | 100701015 | 96.8848  |
| 2        | 10.670   | 1.070 | 147864  | 3237940   | 3.1152   |

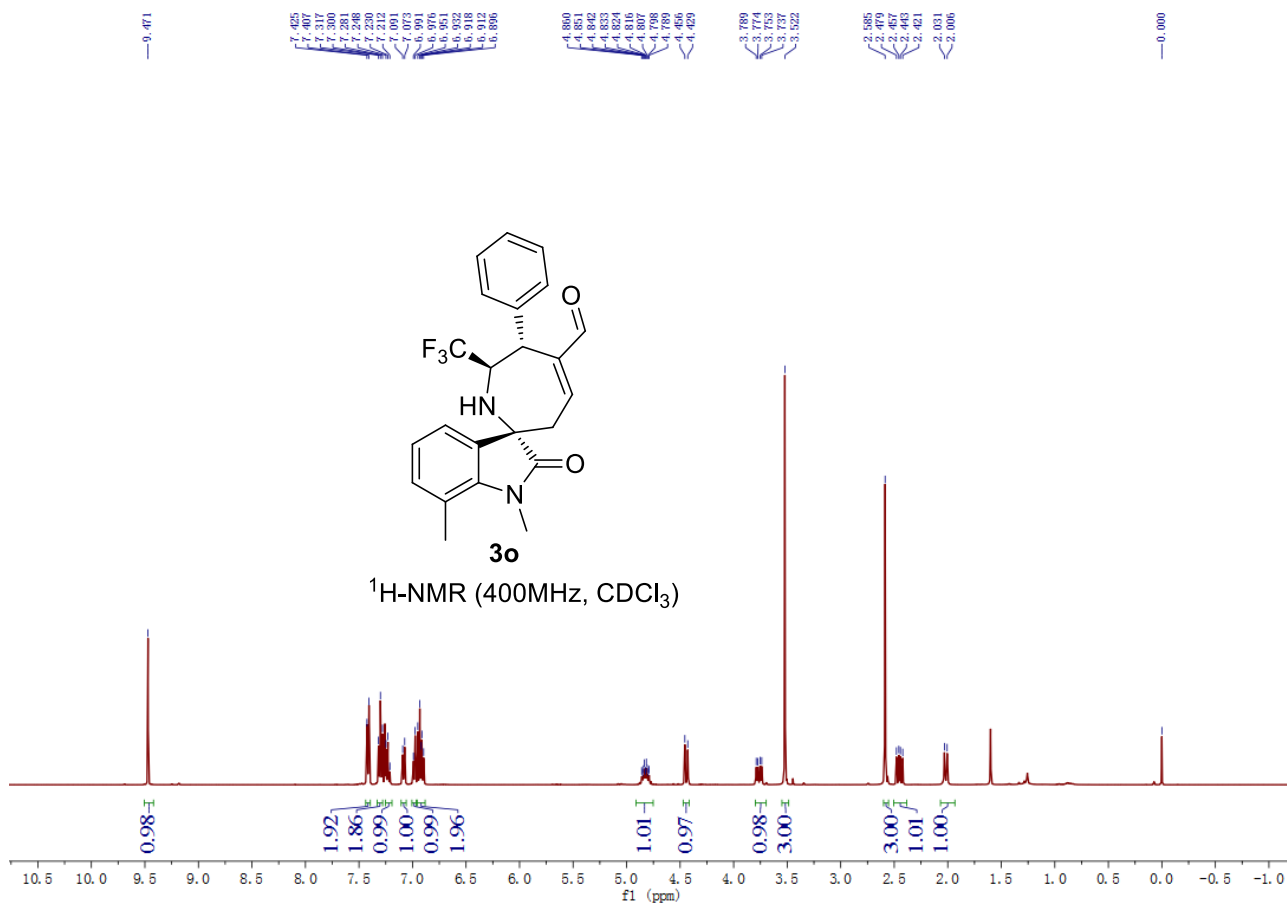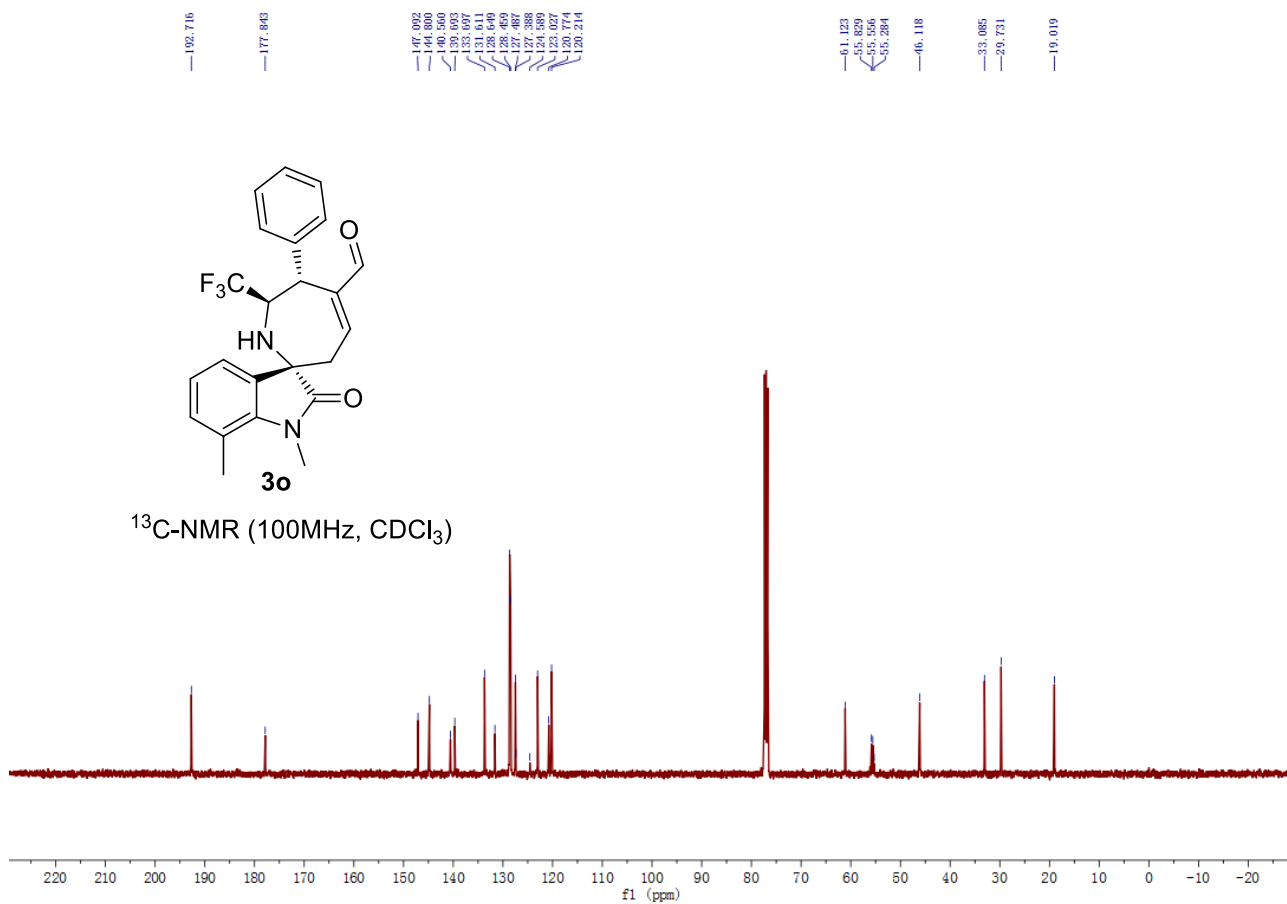

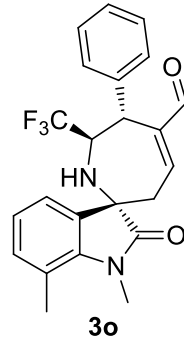

<sup>19</sup>F-NMR (376MHz, CDCl<sub>3</sub>)

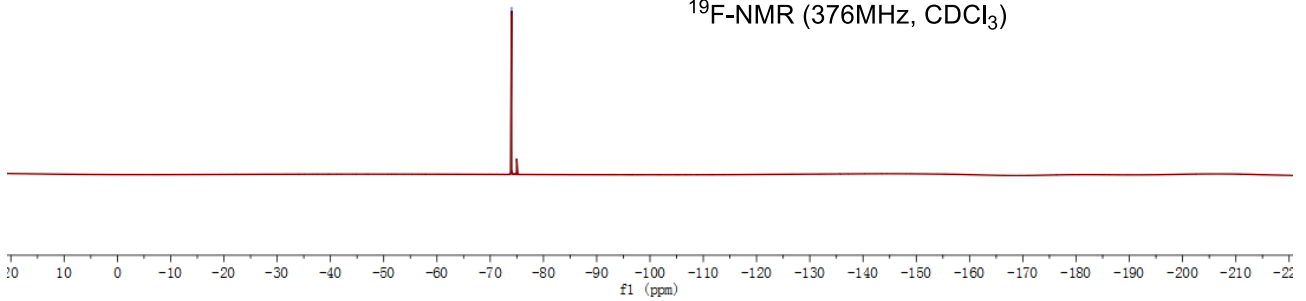

### Spectrum Plot Report

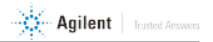

| Name           | CYC-20191124-10   | Rack Pos.    | Instrument | Instrument 1 | Operator                                           |
|----------------|-------------------|--------------|------------|--------------|----------------------------------------------------|
| Inj. Vol. (ul) | 10                | Plate Pos.   | IRM Status | Success      |                                                    |
| Data File      | CYC-20191124-10.d | Method (Acq) | TOF.m      | Comment      | Acq. Time (Local) 12/5/2019 5:00:23 PM (UTC+08:00) |

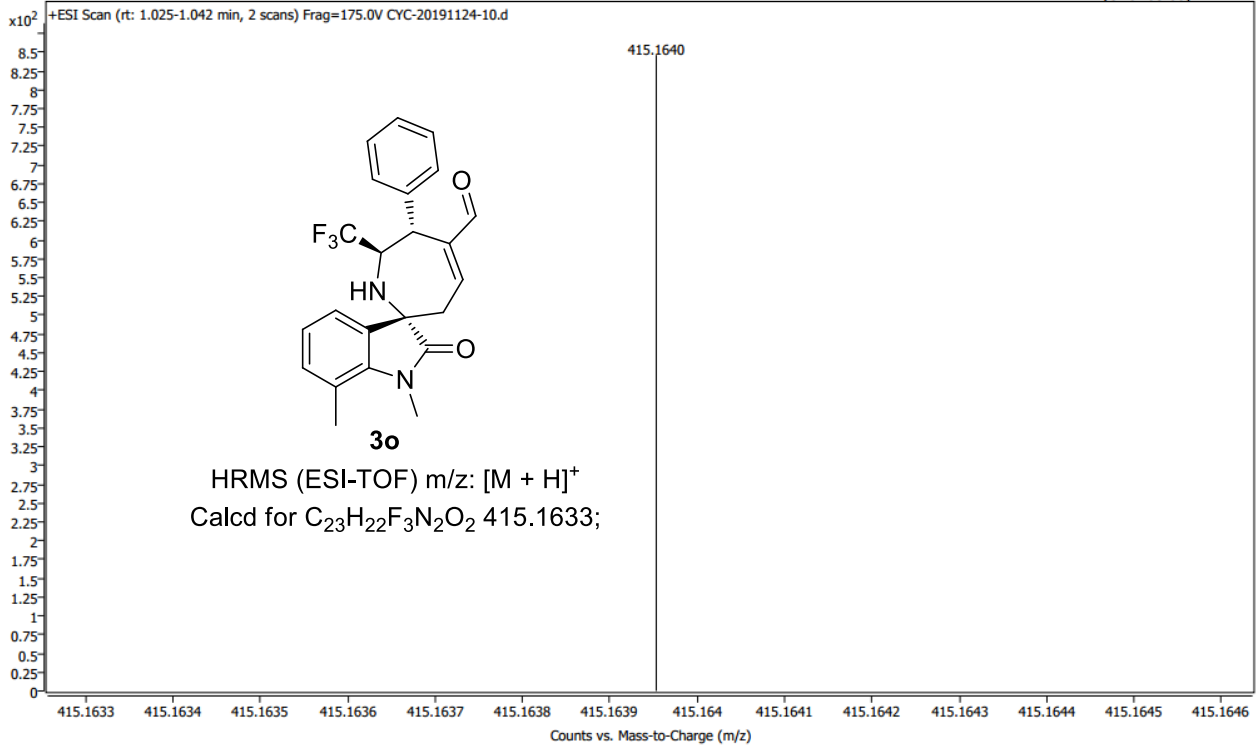

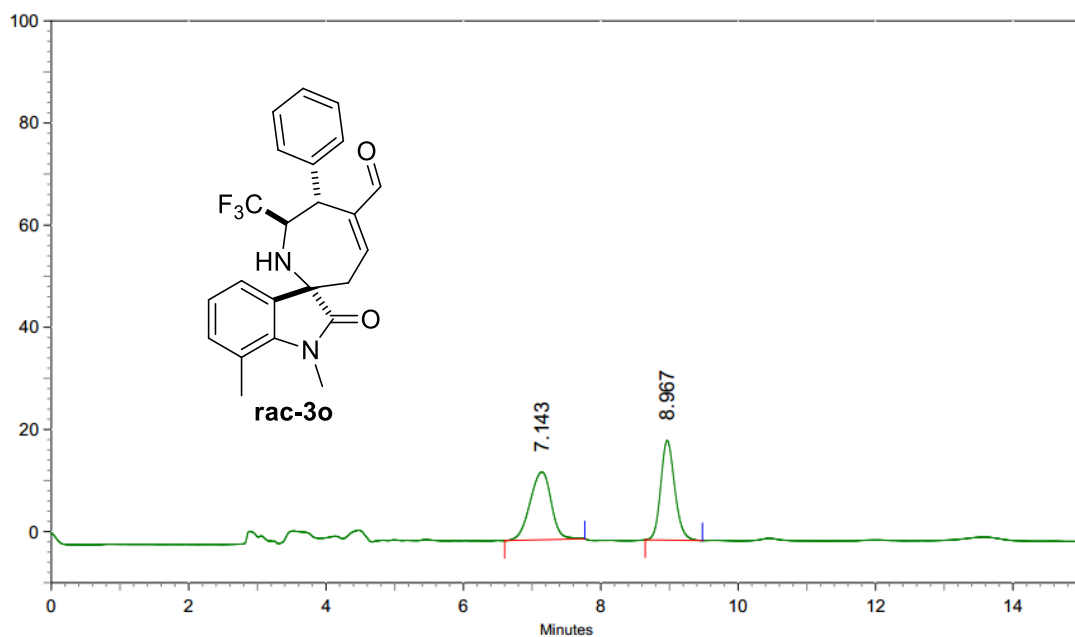

**AREA PERCENT REPORT**

| Peak No. | Ret Time | Width | Height | Area    | Area [%] |
|----------|----------|-------|--------|---------|----------|
| 1        | 7.143    | 1.167 | 222635 | 4793233 | 50.7573  |
| 2        | 8.967    | 0.833 | 327218 | 4650212 | 49.2427  |

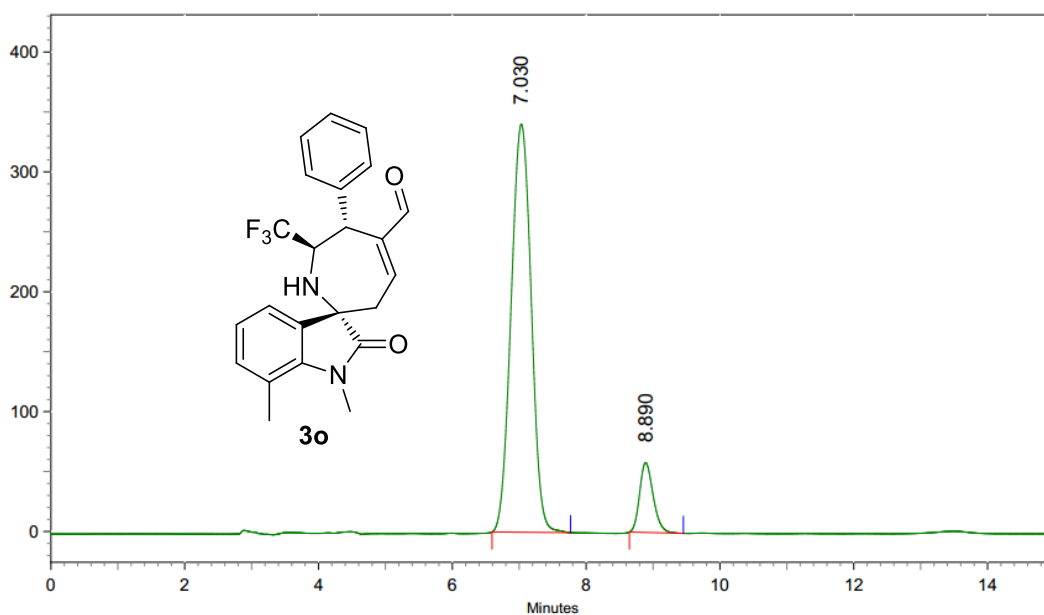

**AREA PERCENT REPORT**

| Peak No. | Ret Time | Width | Height  | Area      | Area [%] |
|----------|----------|-------|---------|-----------|----------|
| 1        | 7.030    | 1.173 | 5710888 | 119099835 | 89.6330  |
| 2        | 8.890    | 0.807 | 978082  | 13775193  | 10.3670  |



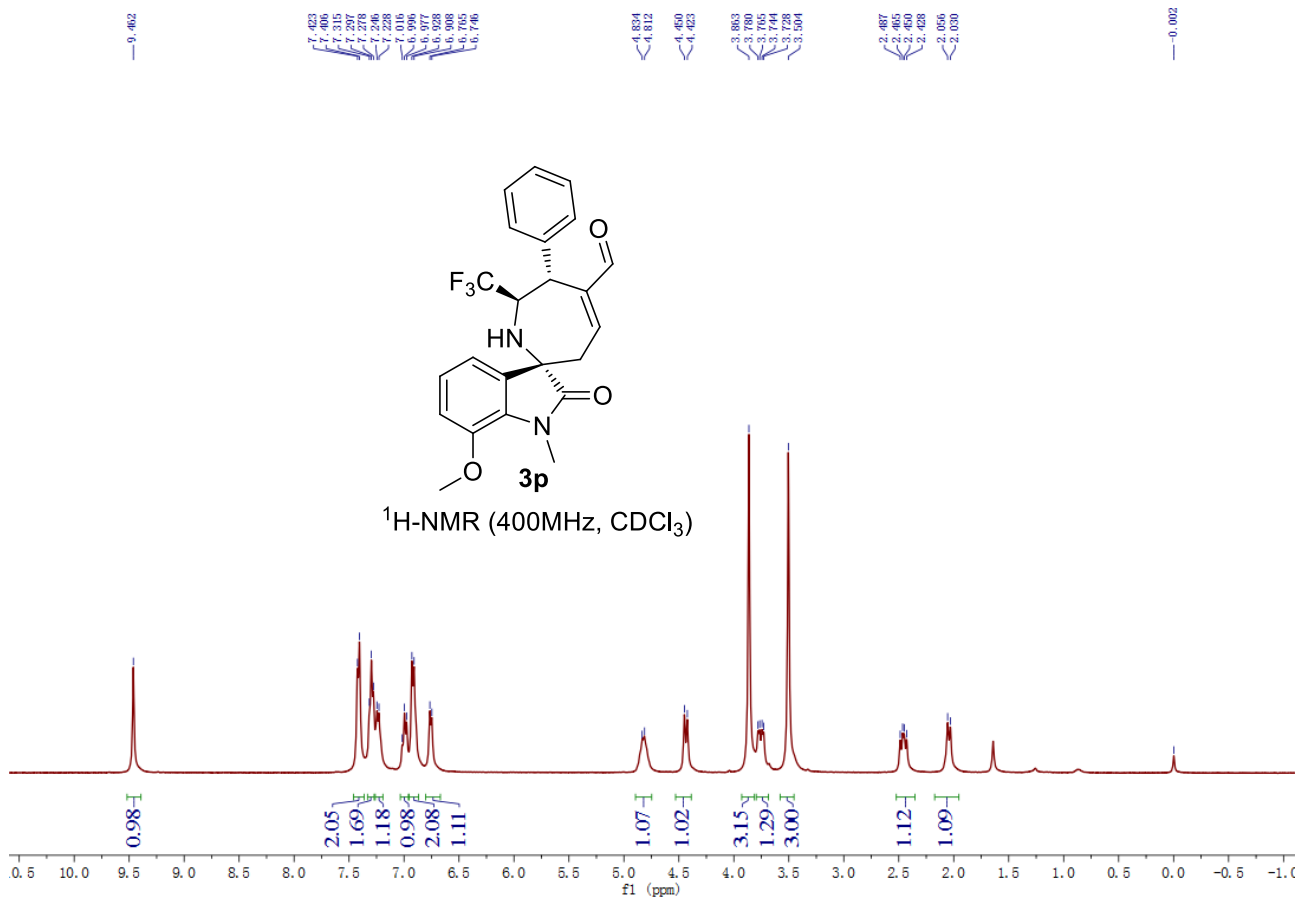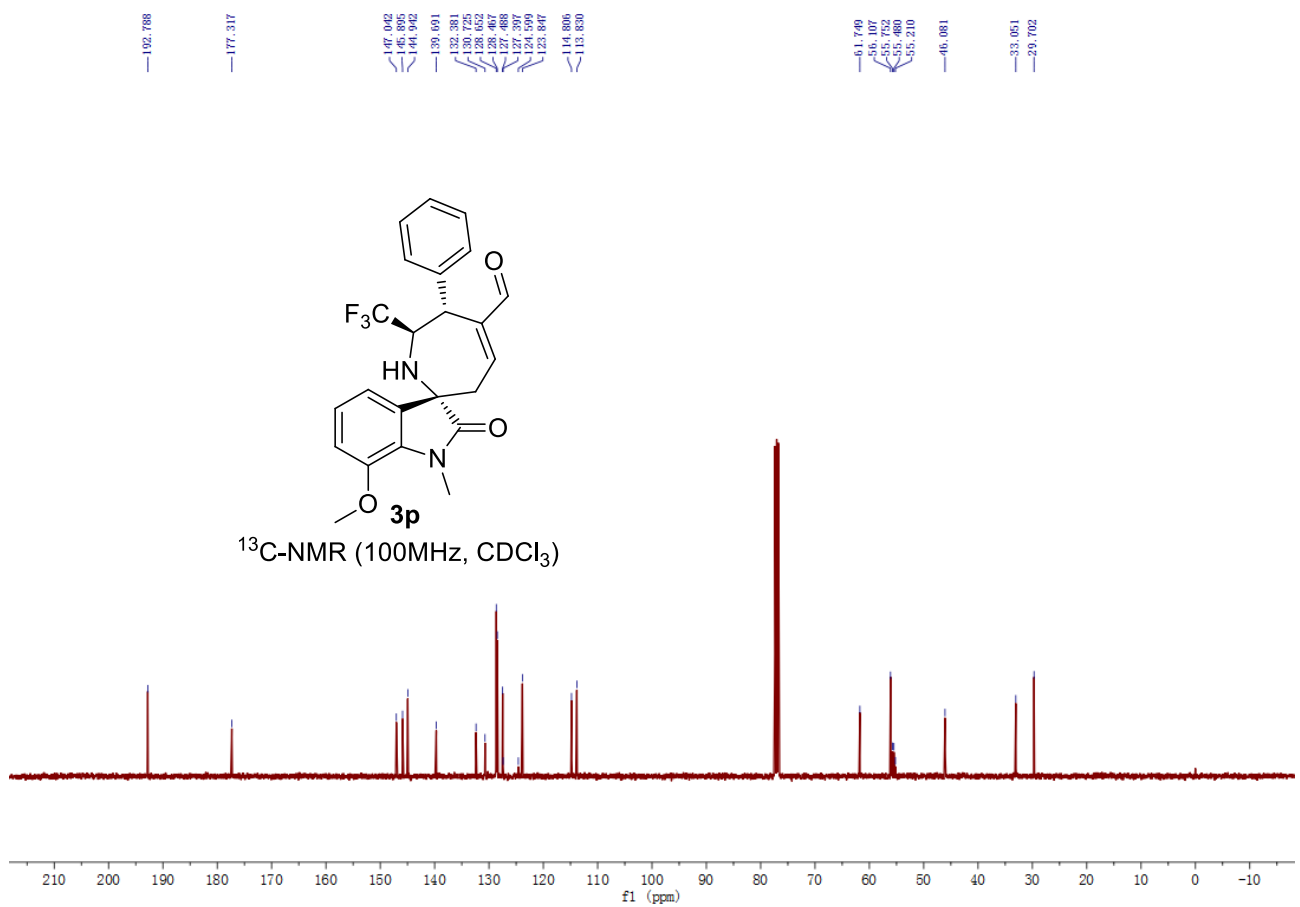

-71.009

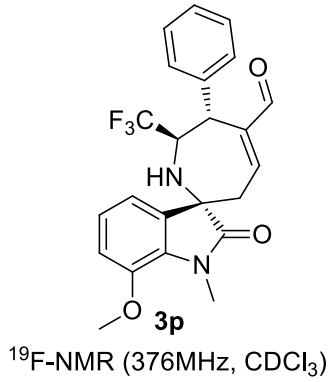

### Spectrum Plot Report

Agilent | Trusted Answers

| Name           | CYC-20200105-48   | Rack Pos.    | Instrument | Instrument 1 | Operator                         |
|----------------|-------------------|--------------|------------|--------------|----------------------------------|
| Inj. Vol. (ul) | 10                | Plate Pos.   | IRM Status | Success      |                                  |
| Data File      | CYC-20200105-48.d | Method (Acq) | TOF.m      | Comment      | Acq. Time (Local)                |
|                |                   |              |            |              | 1/10/2020 9:00:52 PM (UTC+08:00) |

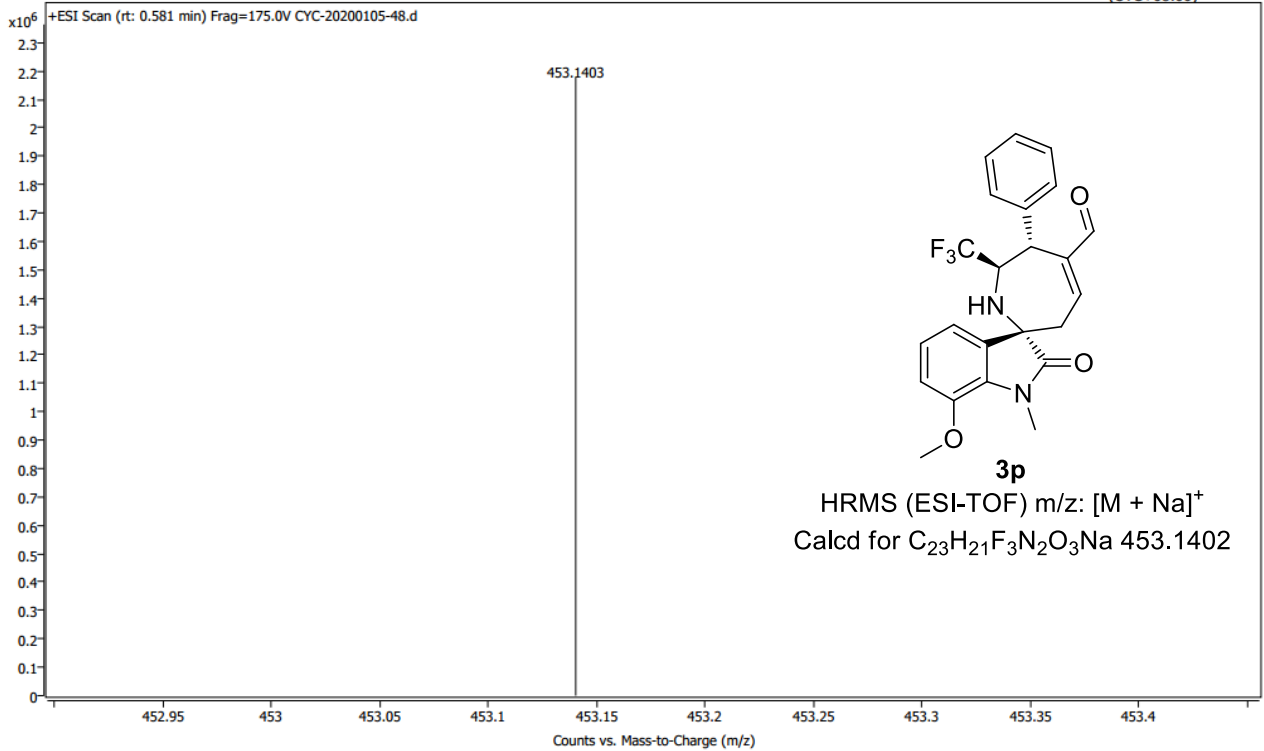

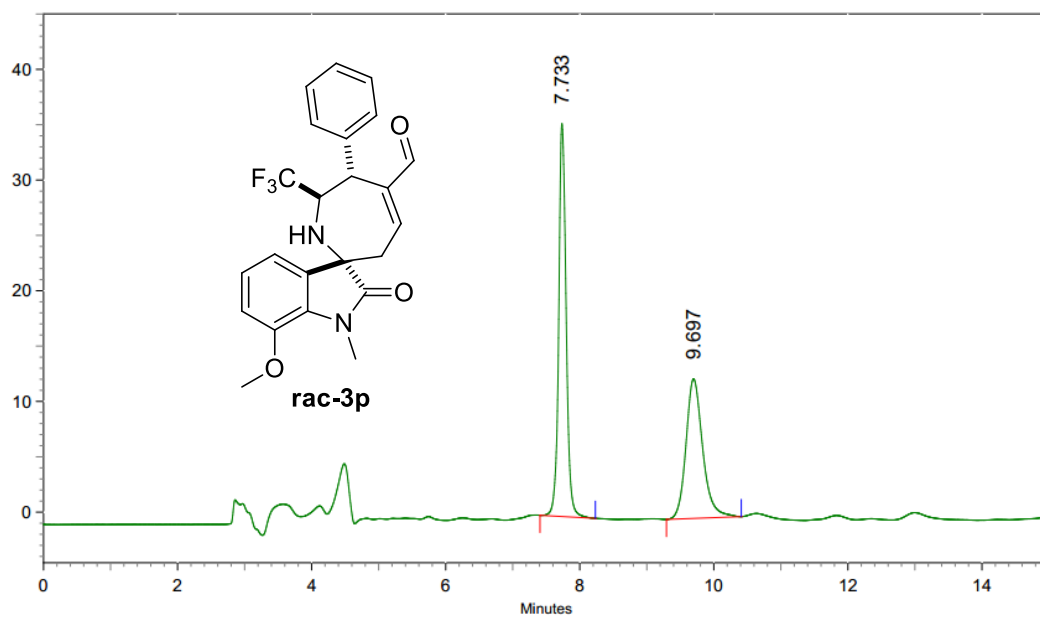

**AREA PERCENT REPORT**

| Peak No. | Ret Time | Width | Height | Area    | Area [%] |
|----------|----------|-------|--------|---------|----------|
| 1        | 7.733    | 0.827 | 595570 | 4593409 | 55.6611  |
| 2        | 9.697    | 1.117 | 211508 | 3659042 | 44.3389  |

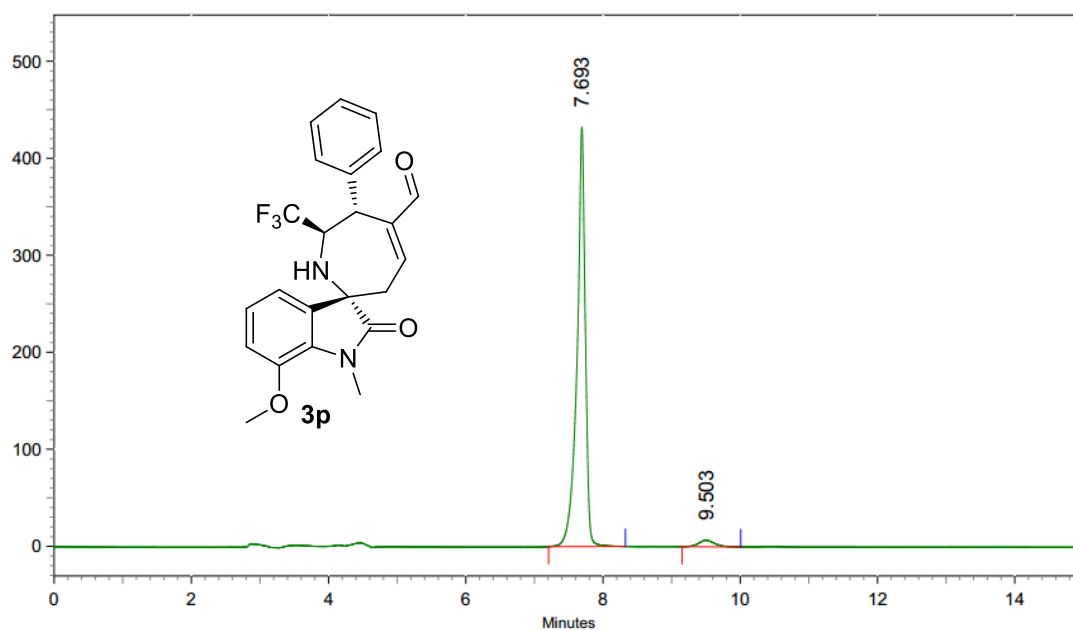

**AREA PERCENT REPORT**

| Peak No. | Ret Time | Width | Height  | Area     | Area [%] |
|----------|----------|-------|---------|----------|----------|
| 1        | 7.693    | 1.120 | 7252583 | 60924393 | 97.0955  |
| 2        | 9.503    | 0.853 | 112154  | 1822483  | 2.9045   |

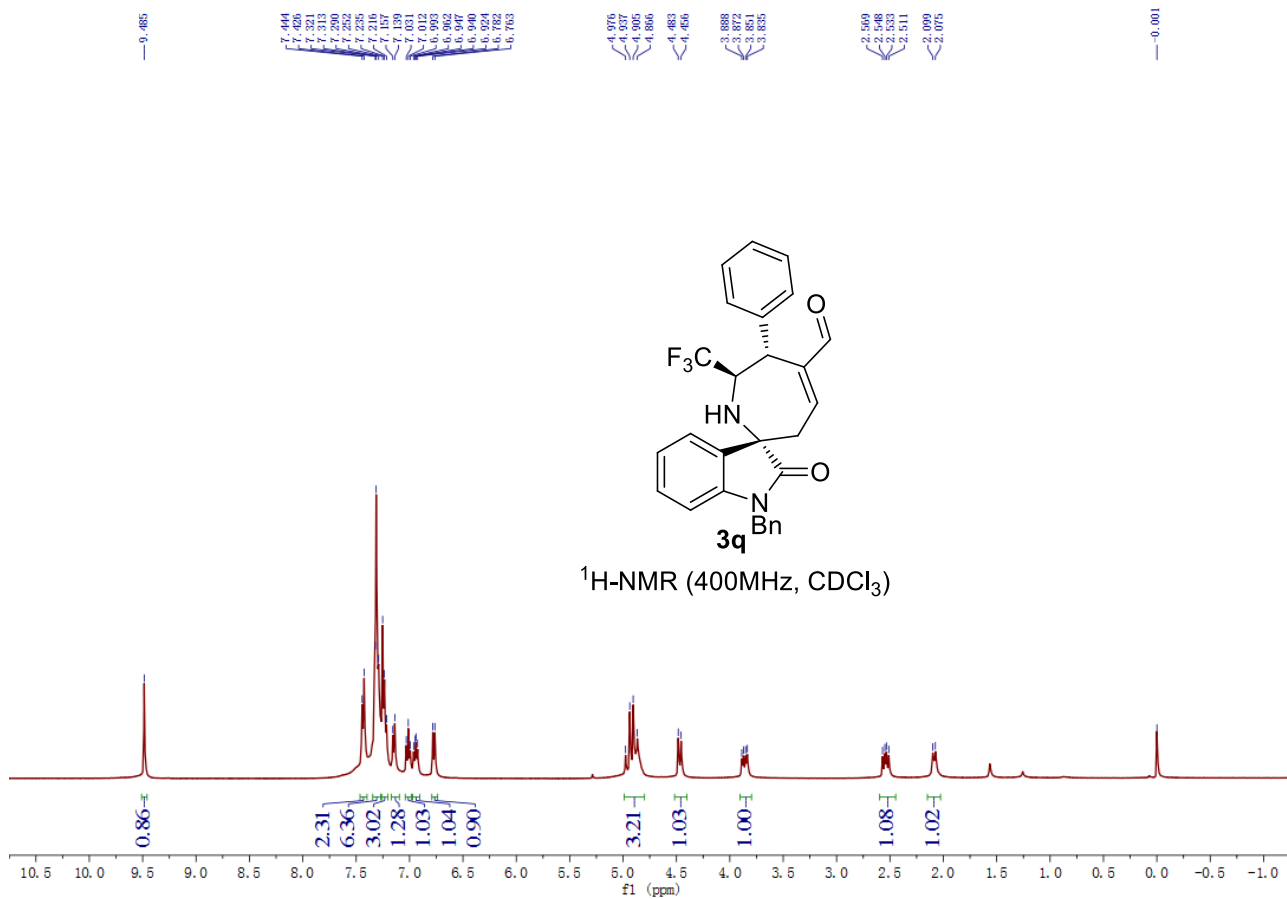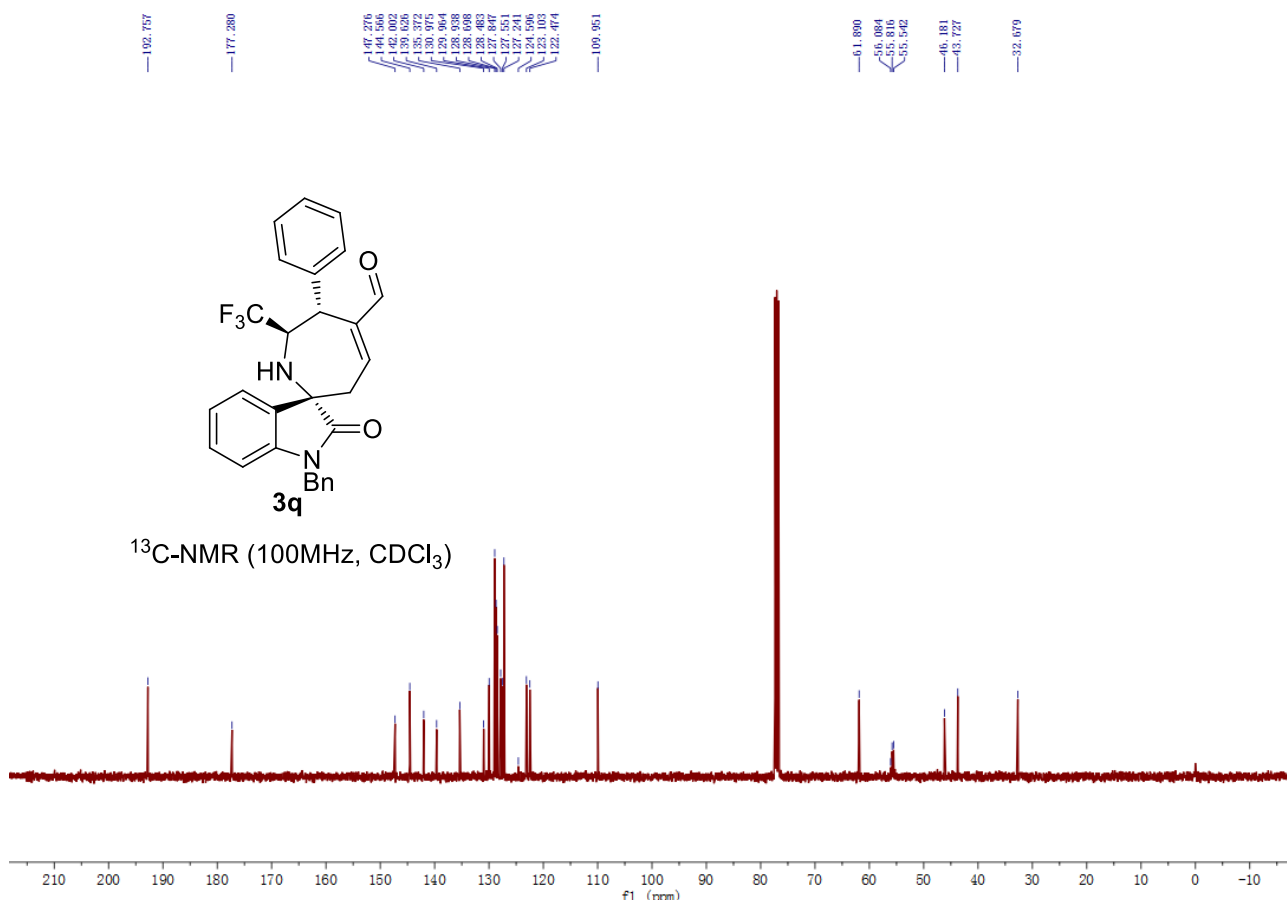

-71.088

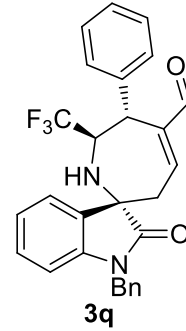

<sup>19</sup>F-NMR (376MHz, CDCl<sub>3</sub>)



### Spectrum Plot Report

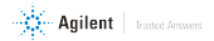

| Name           | CYC-20191124-17   | Rack Pos.    | Instrument | Instrument 1 | Operator                         |
|----------------|-------------------|--------------|------------|--------------|----------------------------------|
| Inj. Vol. (ul) | 10                | Plate Pos.   | IRM Status | Success      |                                  |
| Data File      | CYC-20191124-17.d | Method (Acq) | TOF.m      | Comment      | Acq. Time (Local)                |
|                |                   |              |            |              | 12/5/2019 5:21:28 PM (UTC+08:00) |

+ESI Scan (rt: 0.835 min) Frag=175.0V CYC-20191124-17.d

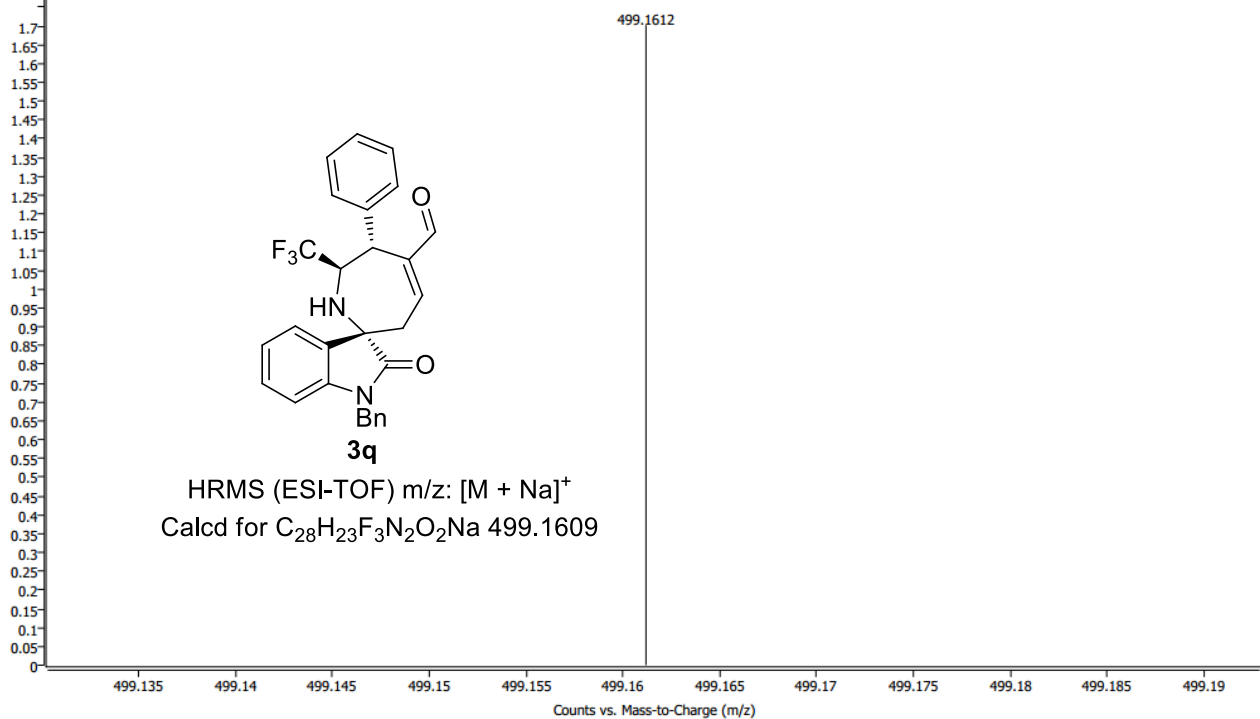

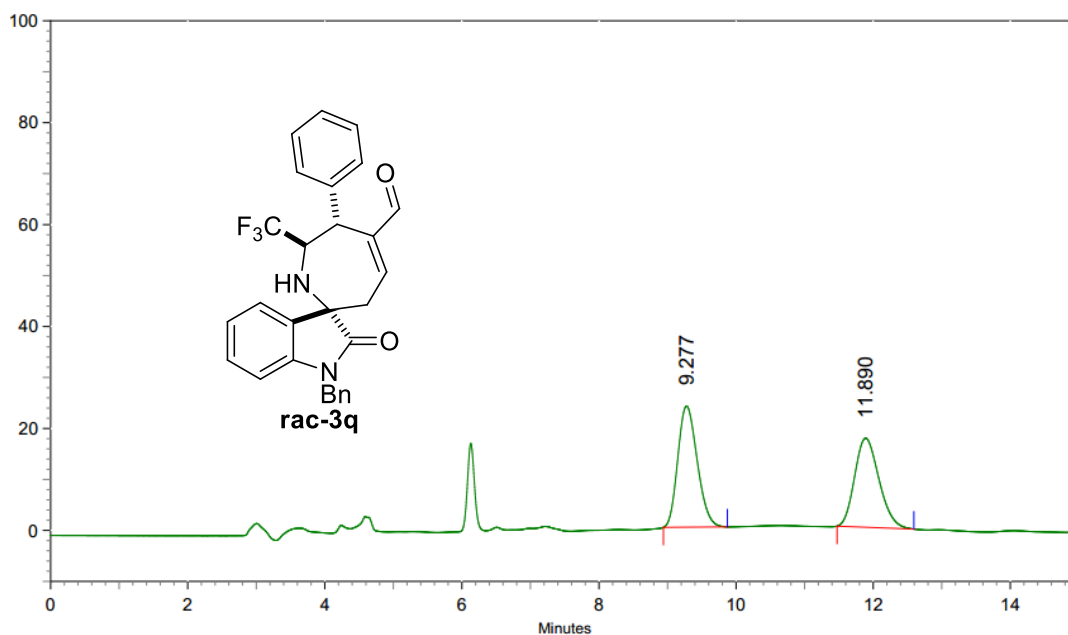

AREA PERCENT REPORT

| Peak No. | Ret Time | Width | Height | Area    | Area [%] |
|----------|----------|-------|--------|---------|----------|
| 1        | 9.277    | 0.933 | 399017 | 7866308 | 52.0840  |
| 2        | 11.890   | 1.120 | 293113 | 7236798 | 47.9160  |

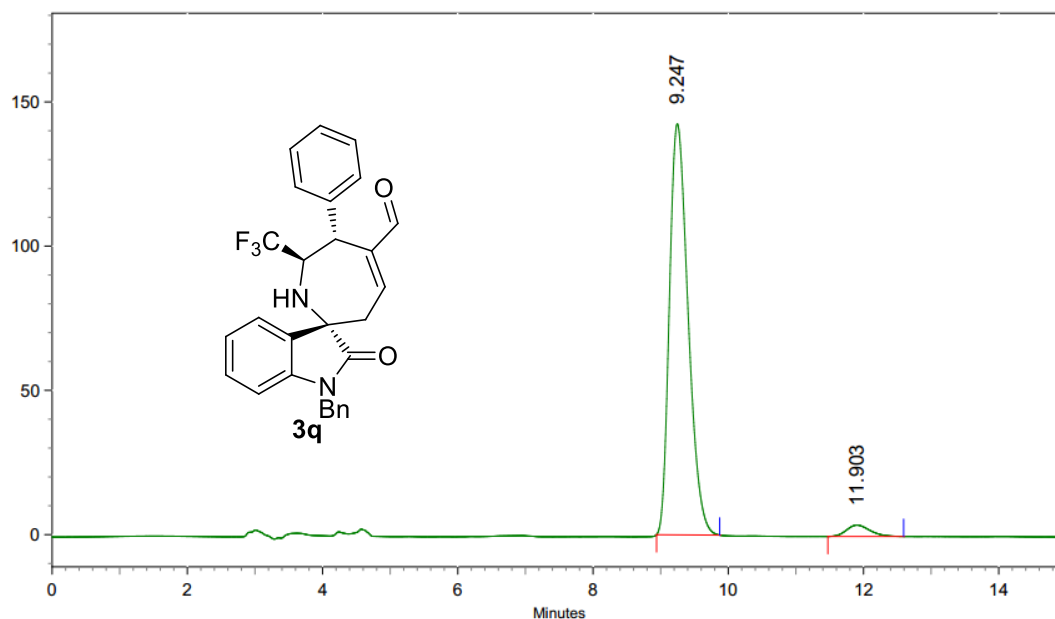

AREA PERCENT REPORT

| Peak No. | Ret Time | Width | Height  | Area     | Area [%] |
|----------|----------|-------|---------|----------|----------|
| 1        | 9.247    | 0.933 | 2389861 | 45812612 | 96.6662  |
| 2        | 11.903   | 1.120 | 65822   | 1579989  | 3.3338   |

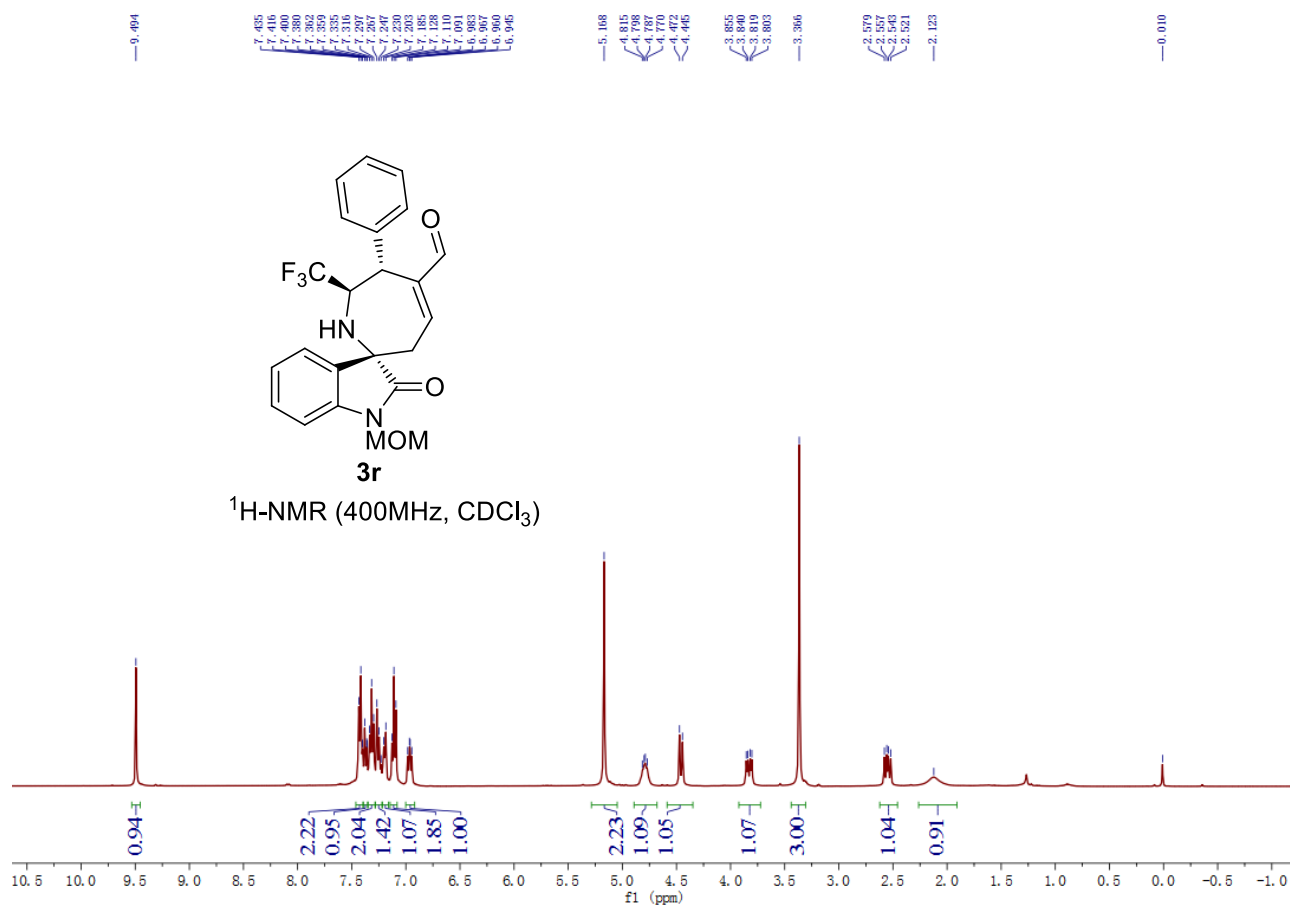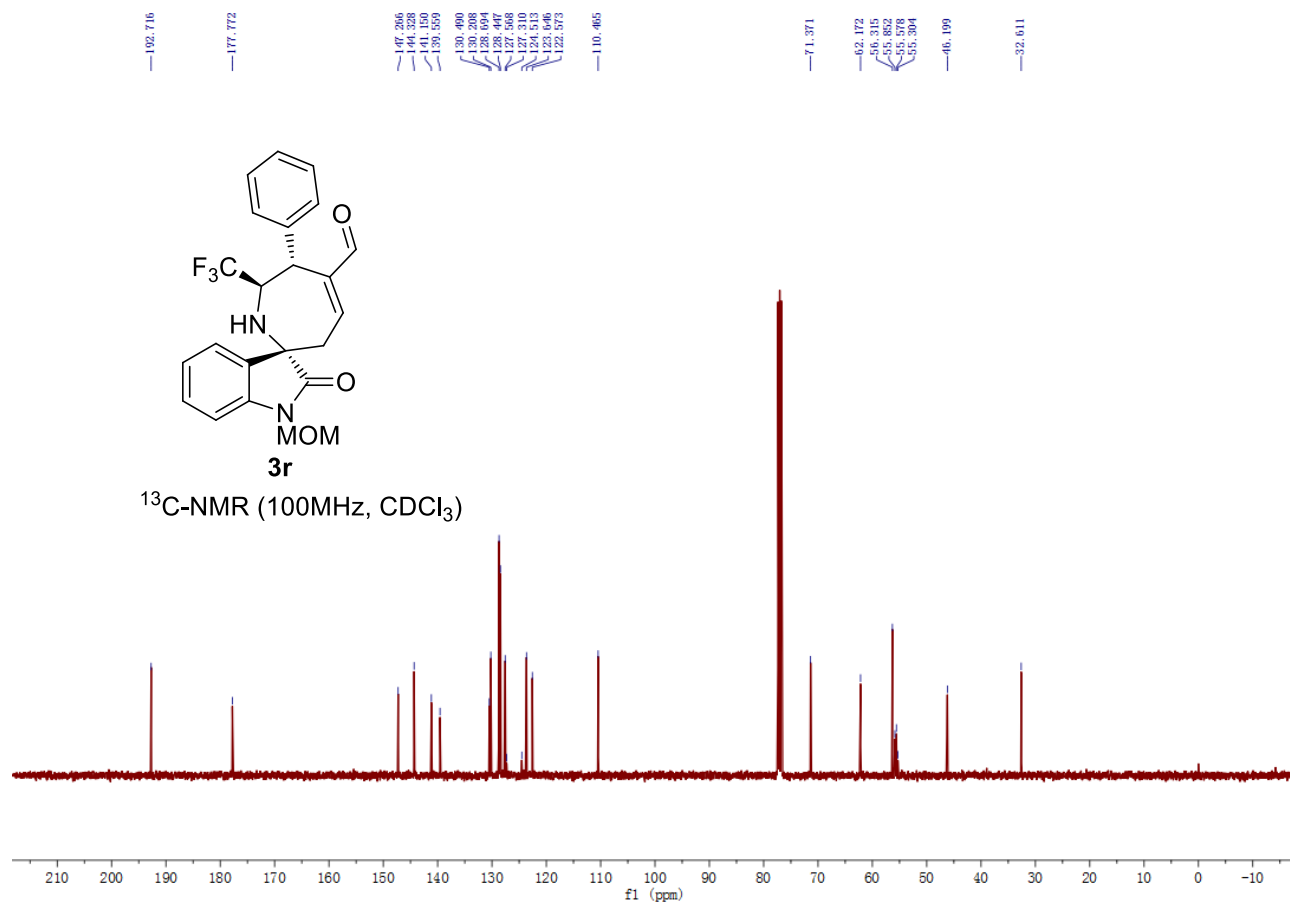

71.154

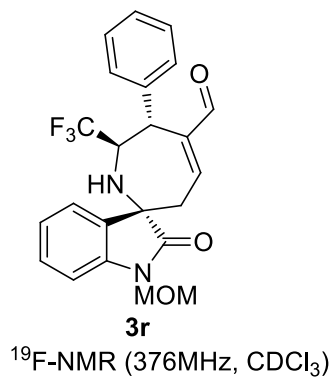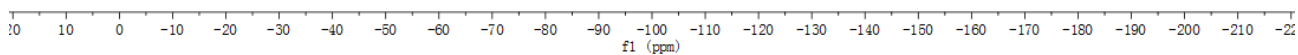

### Spectrum Plot Report

Agilent | Trusted Answers

| Name           | CYC-20191124-16   | Rack Pos.    | Instrument | Instrument 1 | Operator                                           |
|----------------|-------------------|--------------|------------|--------------|----------------------------------------------------|
| Inj. Vol. (ul) | 10                | Plate Pos.   | IRM Status | Success      |                                                    |
| Data File      | CYC-20191124-16.d | Method (Acq) | TOF.m      | Comment      | Acq. Time (Local) 12/5/2019 5:18:27 PM (UTC+08:00) |

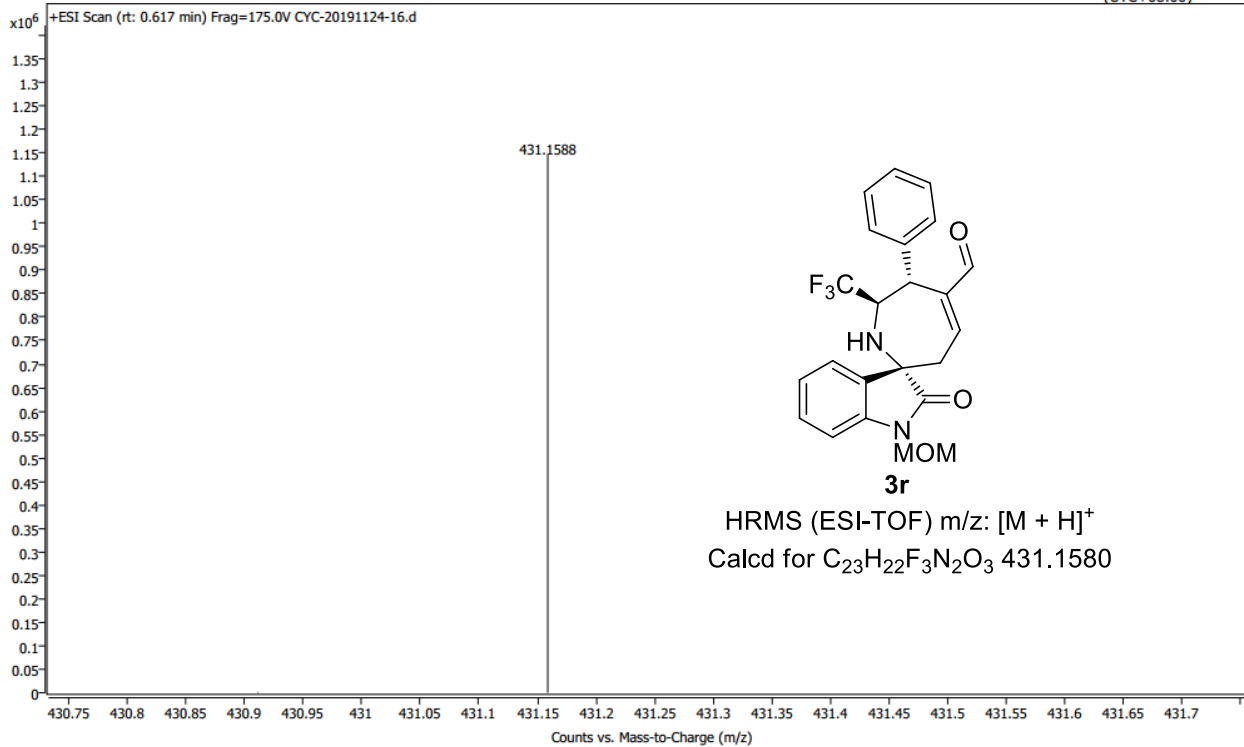



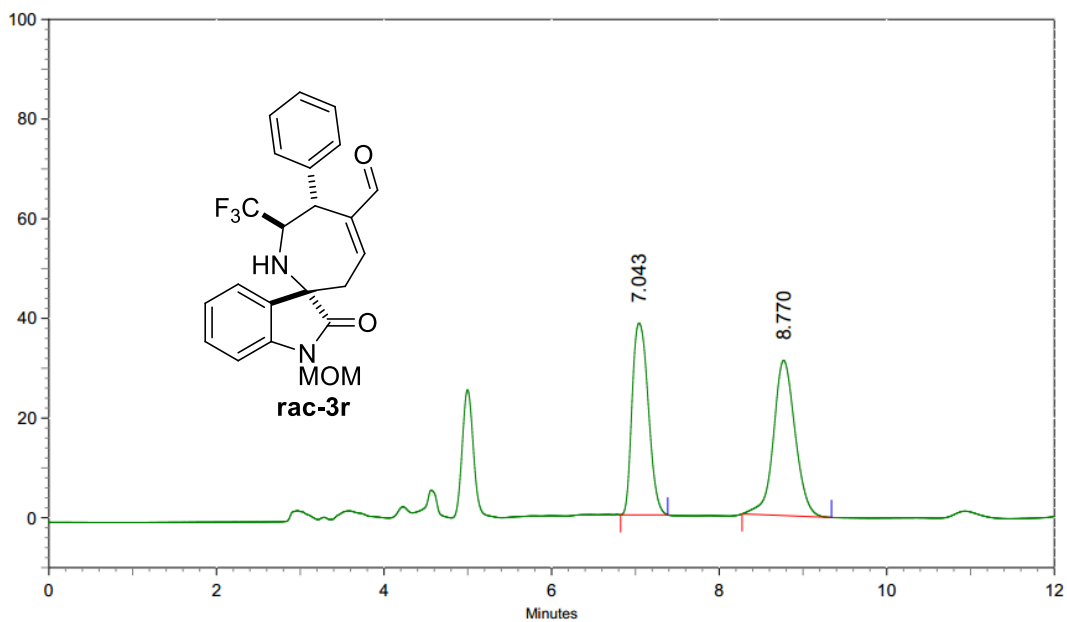

**AREA PERCENT REPORT**

| Peak No. | Ret Time | Width | Height | Area    | Area [%] |
|----------|----------|-------|--------|---------|----------|
| 1        | 7.043    | 0.563 | 645526 | 8648263 | 47.9638  |
| 2        | 8.770    | 1.067 | 522614 | 9382550 | 52.0362  |

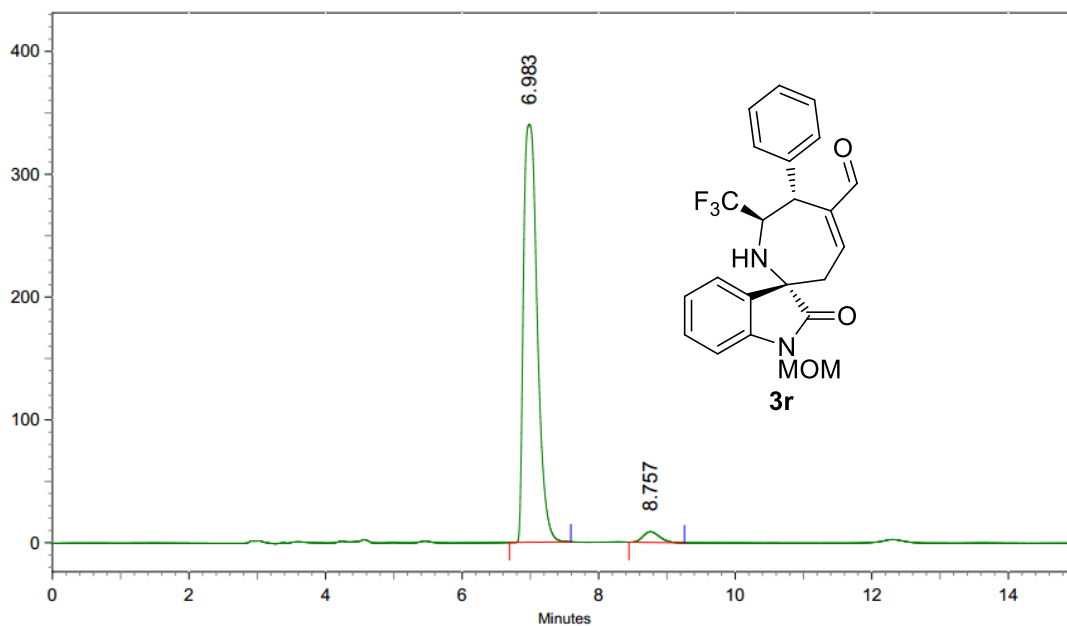

**AREA PERCENT REPORT**

| Peak No. | Ret Time | Width | Height  | Area     | Area [%] |
|----------|----------|-------|---------|----------|----------|
| 1        | 6.983    | 0.900 | 5706553 | 79816728 | 97.0092  |
| 2        | 8.757    | 0.813 | 146107  | 2460725  | 2.9908   |

—0.181

7.332  
7.316  
7.296  
7.283  
7.263  
7.243  
7.193  
7.172  
7.138  
7.127  
7.117  
7.096  
4.975  
4.959

—4.360

3.685  
3.669  
3.638  
3.622  
3.606  
3.337  
3.141  
3.094  
2.970  
2.954  
2.936  
2.913  
2.892  
2.875  
2.690  
2.683  
2.675  
2.668  
2.653  
2.637

—0.000

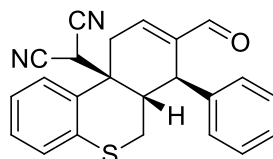

**5a**

<sup>1</sup>H-NMR (400MHz, CDCl<sub>3</sub>)

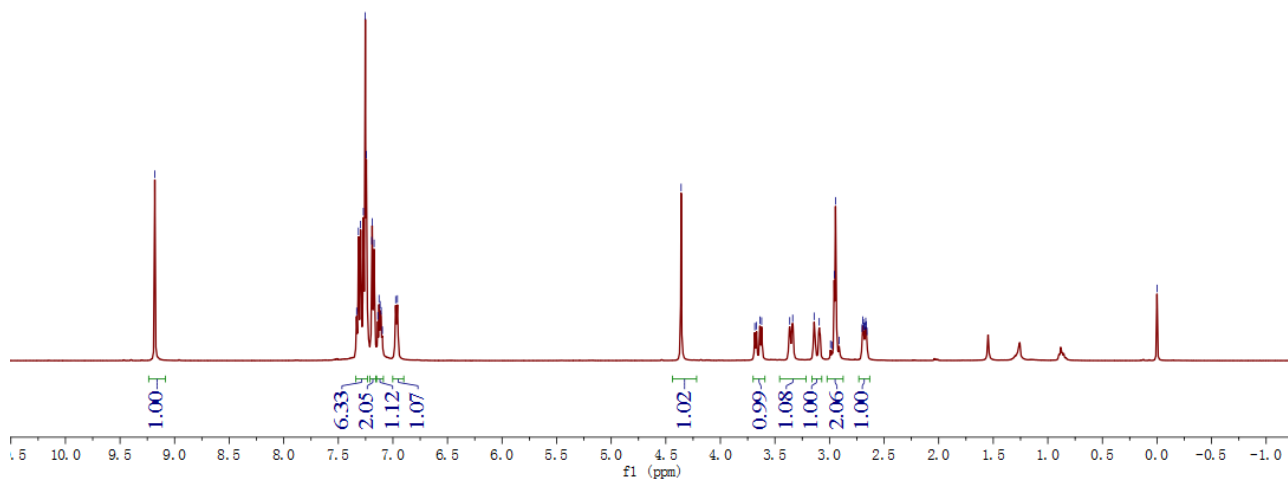

—101.268

143.561  
143.303  
139.987  
136.447  
135.222  
128.950  
128.308  
127.689  
127.629  
127.277  
126.327

110.782  
110.595

43.395  
42.293  
41.894

31.574  
31.131

—22.887

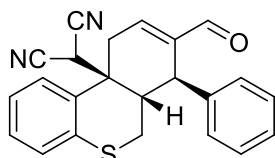

**5a**

<sup>13</sup>C-NMR (100MHz, CDCl<sub>3</sub>)

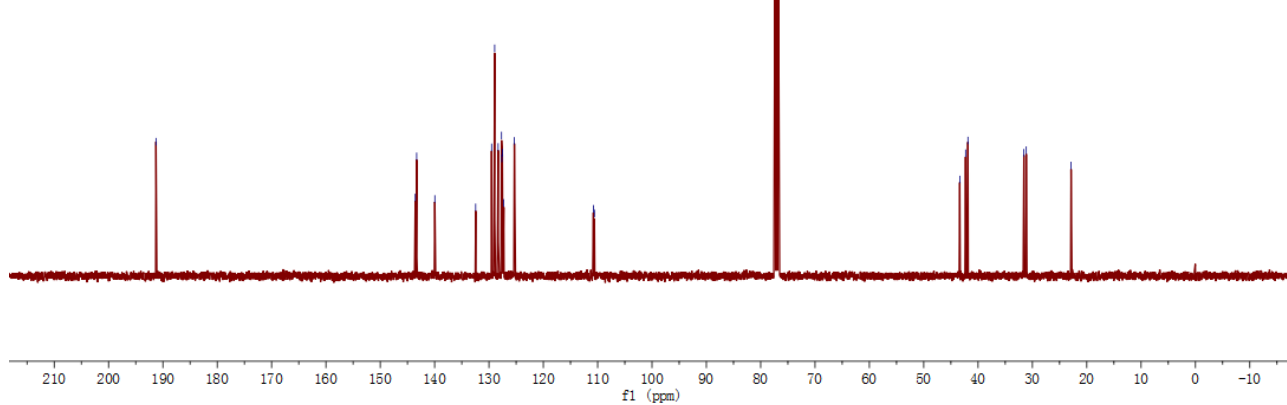

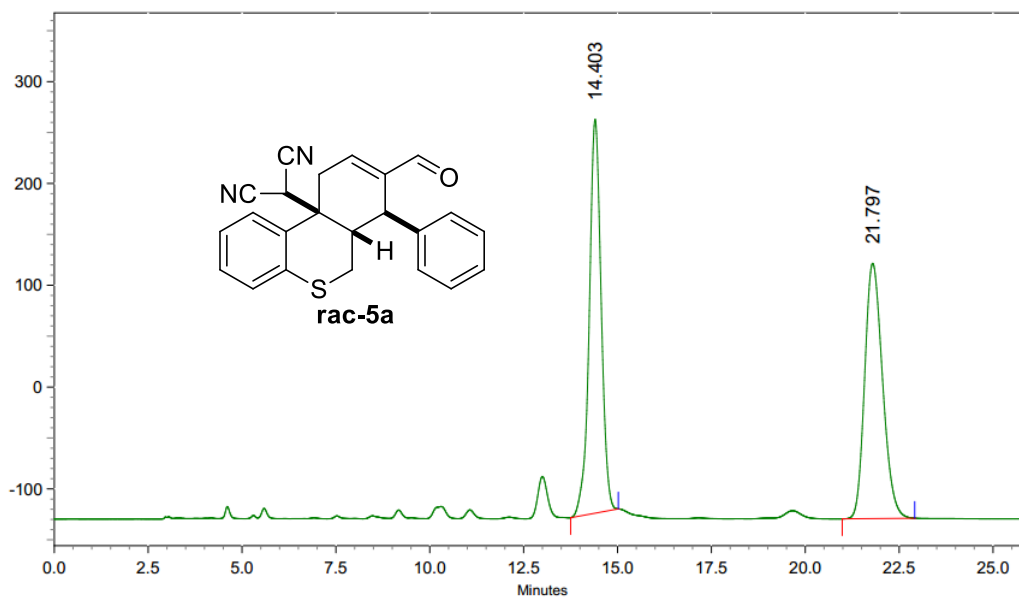

AREA PERCENT REPORT

| Peak No. | Ret Time | Width | Height  | Area      | Area [%] |
|----------|----------|-------|---------|-----------|----------|
| 1        | 14.403   | 1.270 | 6488628 | 142653584 | 50.6021  |
| 2        | 21.797   | 1.930 | 4206350 | 139259011 | 49.3979  |

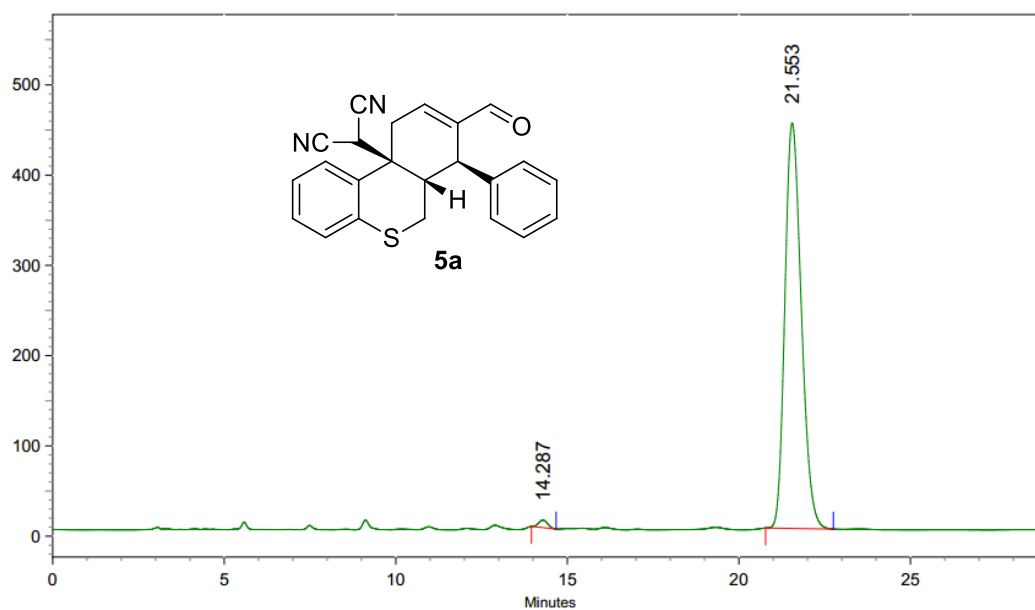

AREA PERCENT REPORT

| Peak No. | Ret Time | Width | Height  | Area      | Area [%] |
|----------|----------|-------|---------|-----------|----------|
| 1        | 14.287   | 0.720 | 139183  | 2529988   | 0.9993   |
| 2        | 21.553   | 1.973 | 7537649 | 250646561 | 99.0007  |

GY-471 18 (0.232)

1: TOF MS ES+  
6.49e4

393.1033

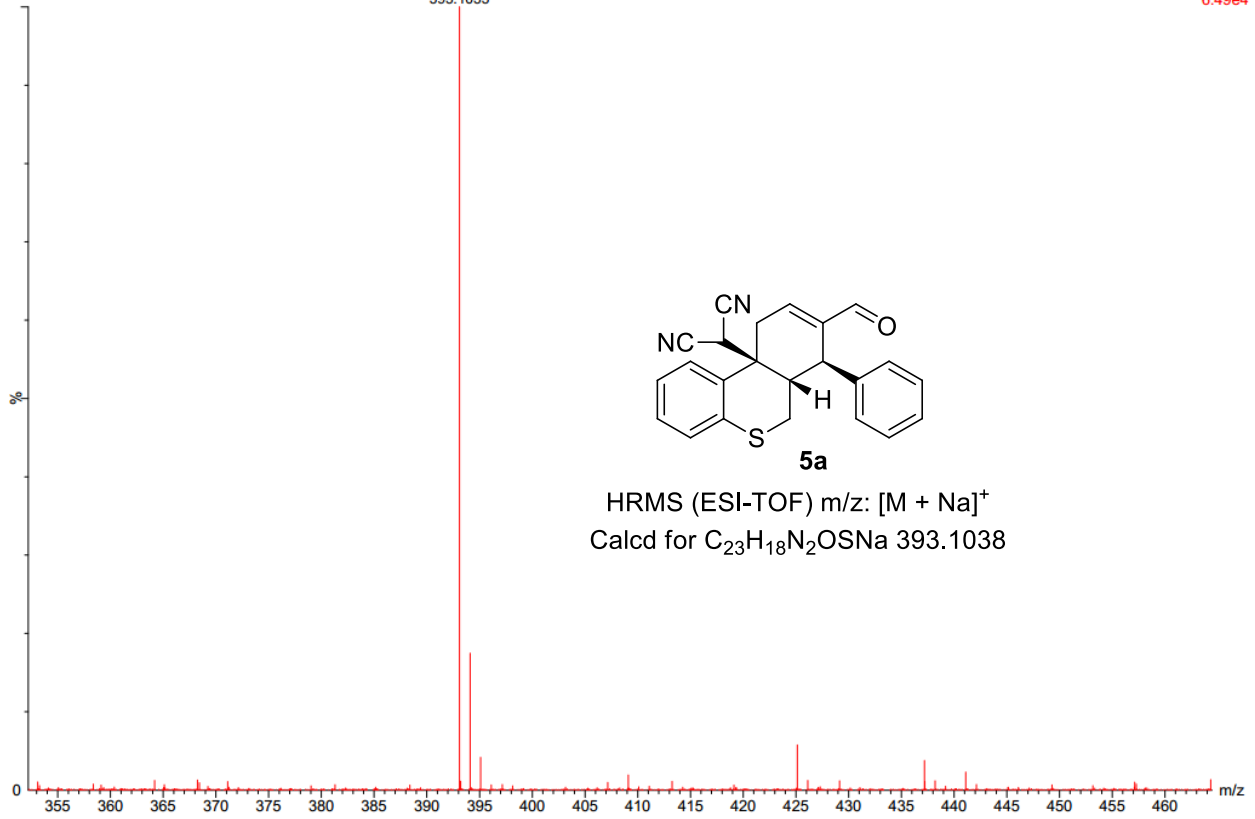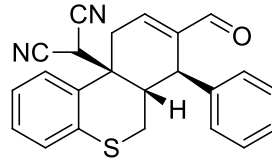

**5a**

HRMS (ESI-TOF) m/z: [M + Na]<sup>+</sup>  
Calcd for C<sub>23</sub>H<sub>18</sub>N<sub>2</sub>OSNa 393.1038

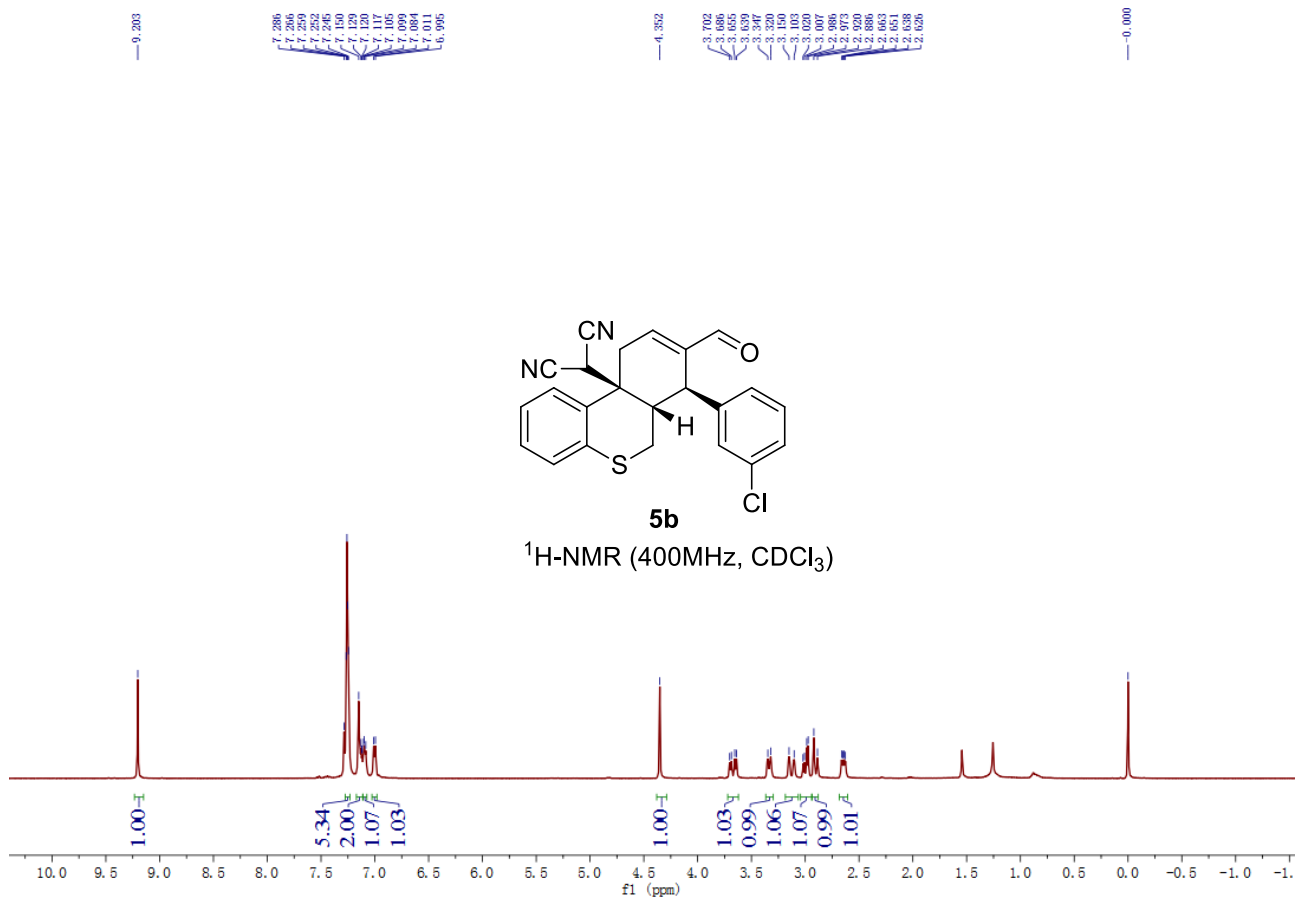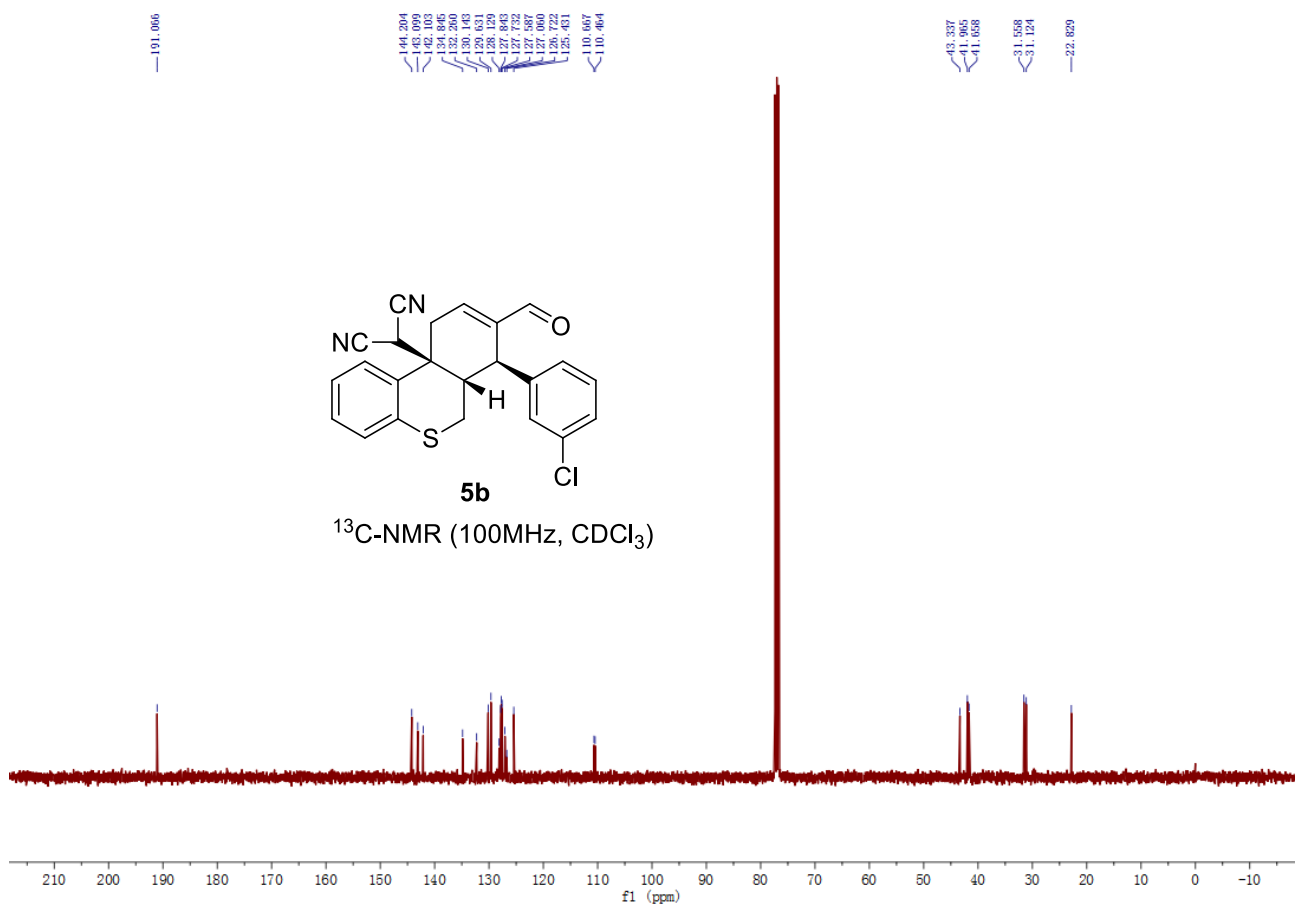

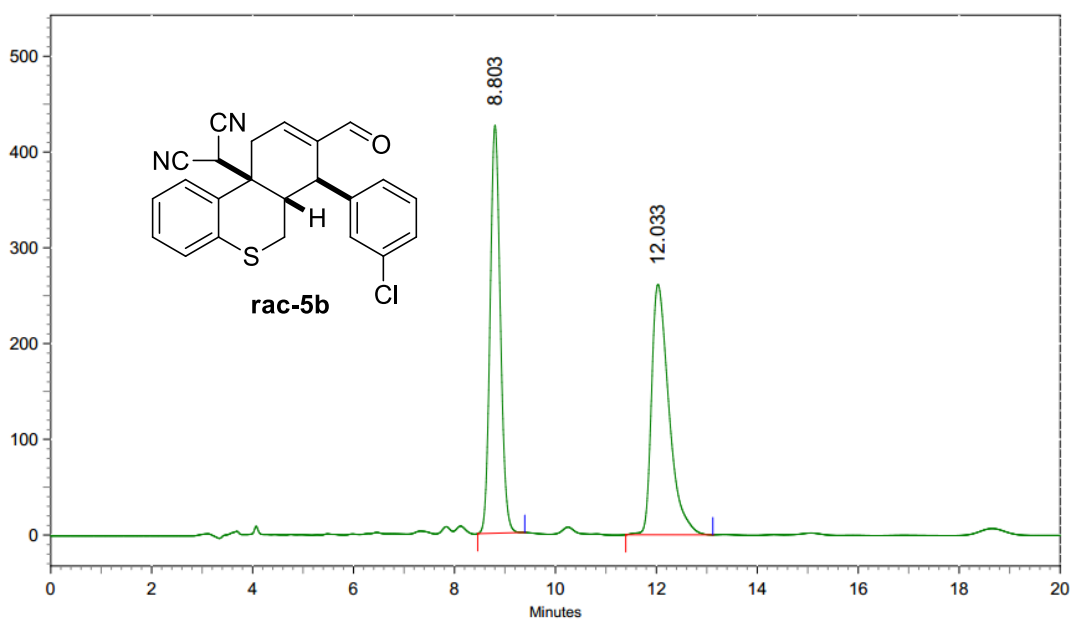

**AREA PERCENT REPORT**

| Peak No. | Ret Time | Width | Height  | Area      | Area [%] |
|----------|----------|-------|---------|-----------|----------|
| 1        | 8.803    | 0.933 | 7148432 | 100455553 | 48.8676  |
| 2        | 12.033   | 1.727 | 4386462 | 105111288 | 51.1324  |

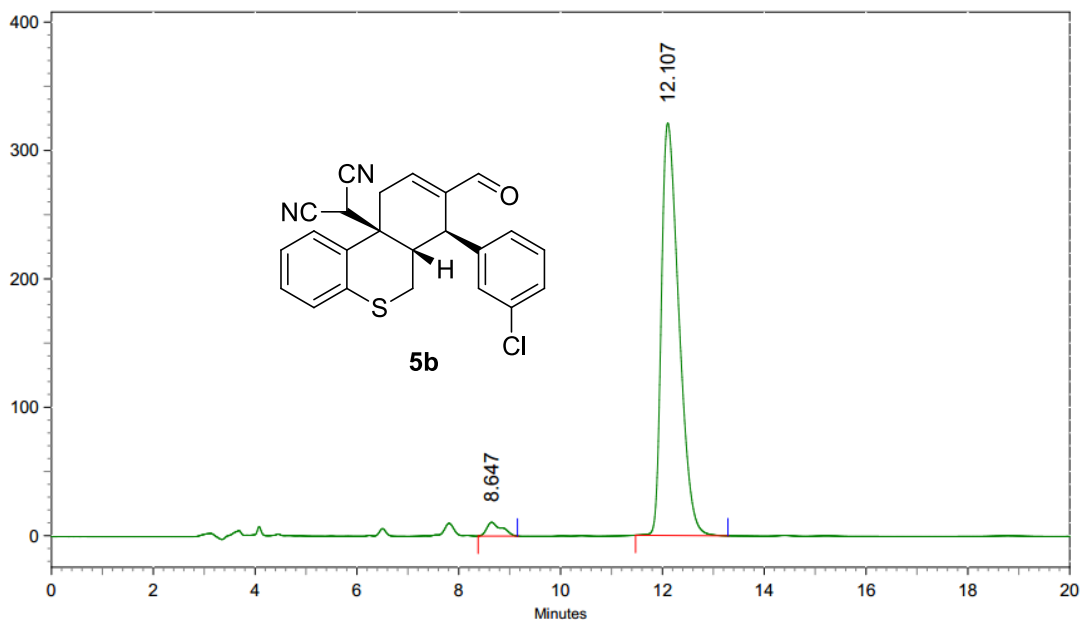

**AREA PERCENT REPORT**

| Peak No. | Ret Time | Width | Height  | Area      | Area [%] |
|----------|----------|-------|---------|-----------|----------|
| 1        | 8.647    | 0.773 | 179830  | 3709411   | 2.8119   |
| 2        | 12.107   | 1.813 | 5388844 | 128209110 | 97.1881  |

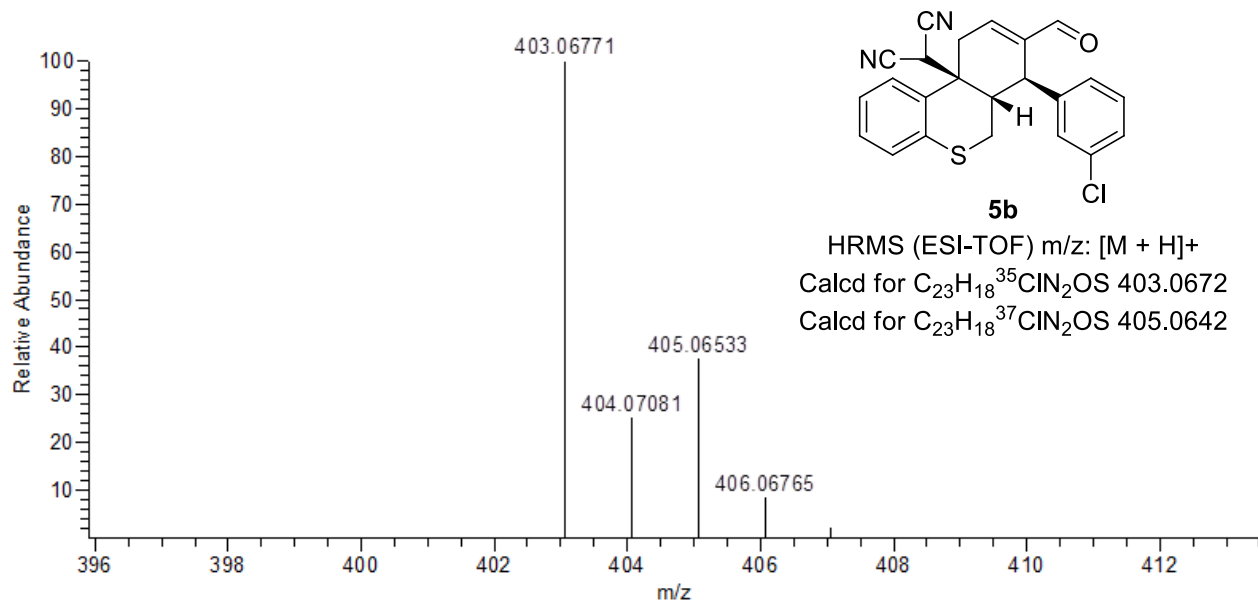

— 9.191

7.303  
7.297  
7.292  
7.287  
7.281  
7.277  
7.271  
7.136  
7.116  
6.991  
6.974

— 4.345

3.696  
3.680  
3.640  
3.633  
3.555  
3.529  
3.522  
3.136  
3.089  
3.008  
2.974  
2.971  
2.896  
2.862  
2.836  
2.622  
2.614

— 0.000

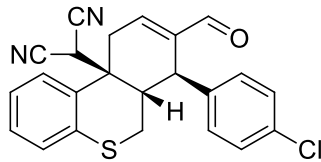

**5c**

<sup>1</sup>H-NMR (400MHz, CDCl<sub>3</sub>)

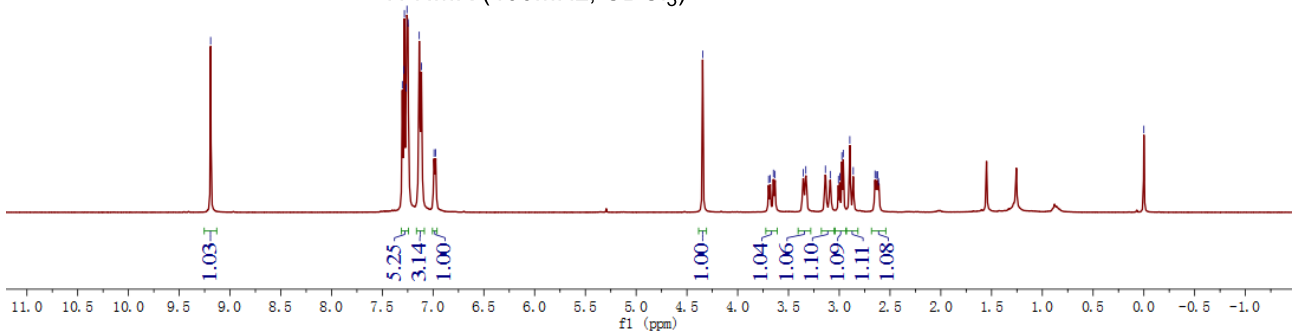

— 191.176

144.189  
143.239  
138.523  
133.374  
132.290  
128.625  
128.496  
129.145  
129.126  
127.716  
127.591  
126.436  
110.690  
110.482

43.296  
41.050  
31.556  
31.194  
22.894

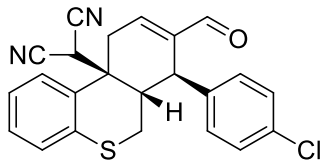

**5c**

<sup>13</sup>C-NMR (100MHz, CDCl<sub>3</sub>)

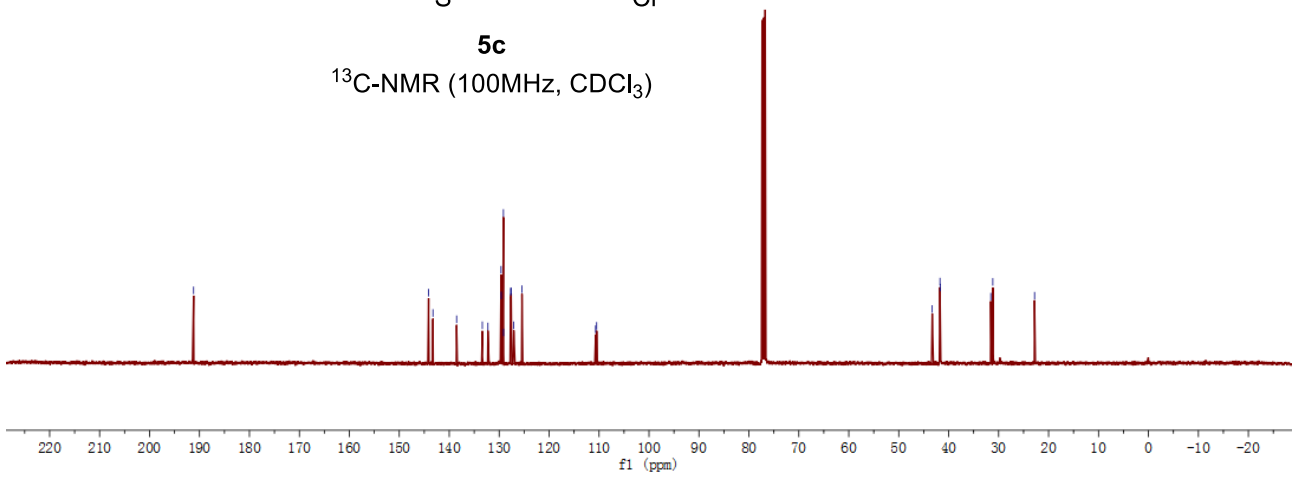



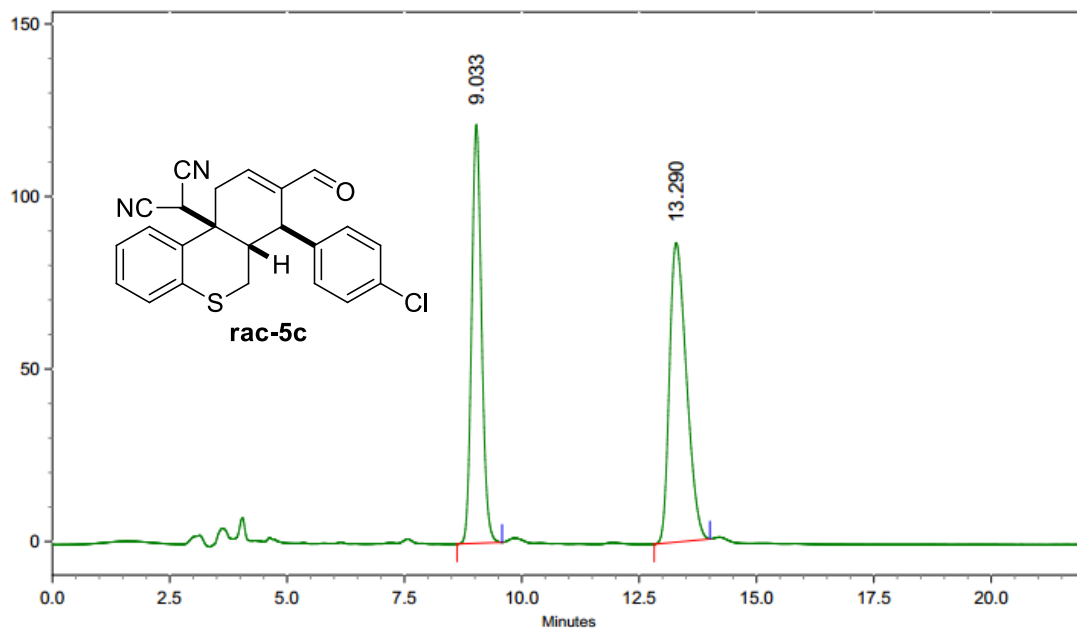

### AREA PERCENT REPORT

| Peak No. | Ret Time | Width | Height  | Area     | Area [%] |
|----------|----------|-------|---------|----------|----------|
| 1        | 9.033    | 0.960 | 2035773 | 29889218 | 44.9493  |
| 2        | 13.290   | 1.187 | 1455614 | 36606223 | 55.0507  |

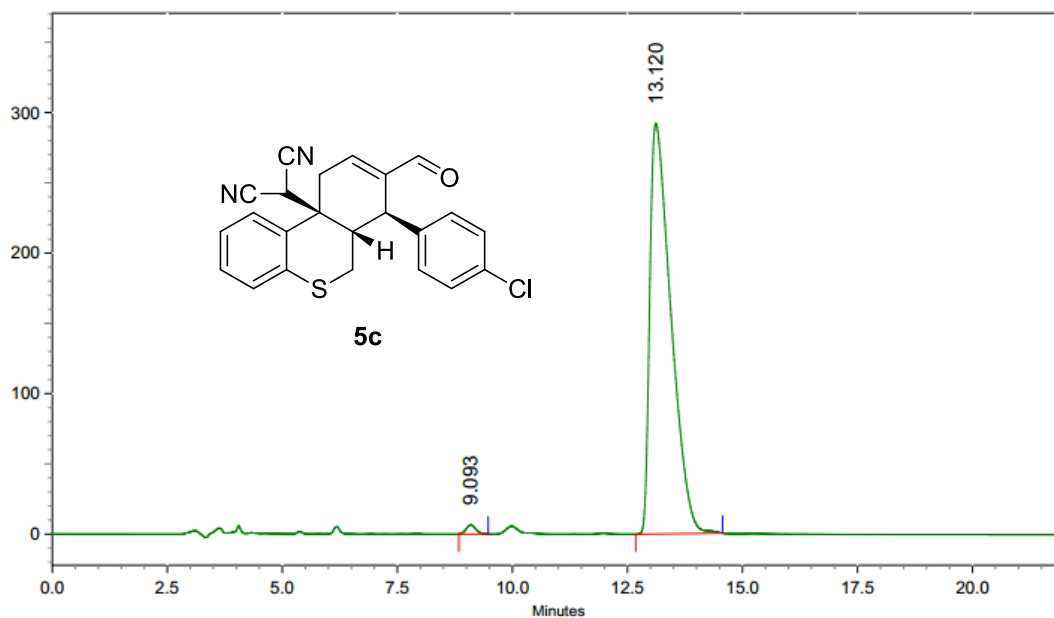

### AREA PERCENT REPORT

| Peak No. | Ret Time | Width | Height  | Area      | Area [%] |
|----------|----------|-------|---------|-----------|----------|
| 1        | 9.093    | 0.640 | 108901  | 1592998   | 1.0108   |
| 2        | 13.120   | 1.887 | 4900547 | 156009519 | 98.9892  |

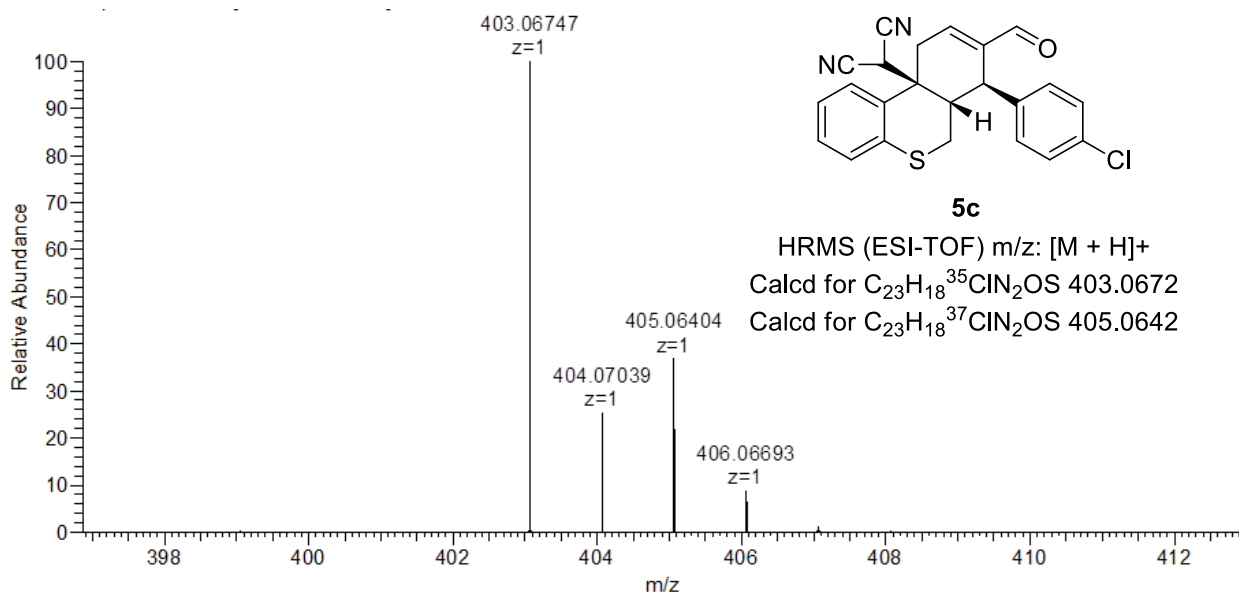

9.189

7.465  
7.454  
7.452  
7.257  
7.246  
7.146  
7.138  
7.124  
7.118  
7.111  
7.095  
6.991  
6.974

4.342

3.695  
3.679  
3.669  
3.632  
3.341  
3.316  
3.287  
3.095  
2.993  
2.972  
2.965  
2.893  
2.859  
2.641  
2.631  
2.605

0.000

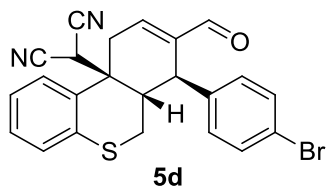

<sup>1</sup>H-NMR (400MHz, CDCl<sub>3</sub>)

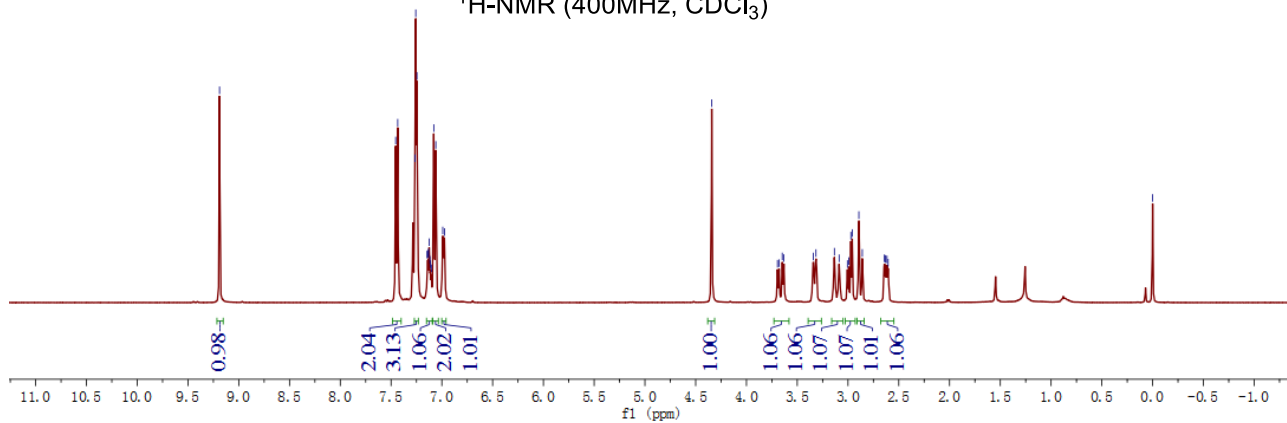

191.132

144.139  
143.194  
139.071  
132.248  
132.087  
129.625  
127.719  
127.593  
127.022  
125.465  
121.869

110.681  
110.472

43.293  
41.748

31.569  
31.168

22.813

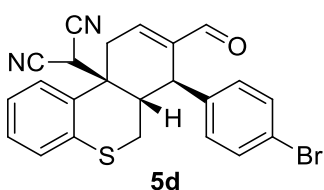

<sup>13</sup>C-NMR (100MHz, CDCl<sub>3</sub>)

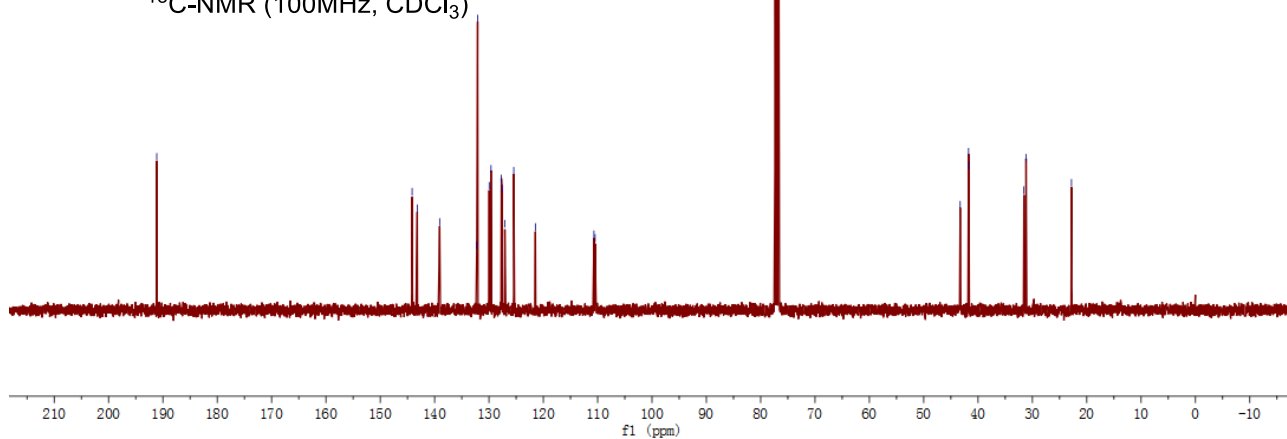

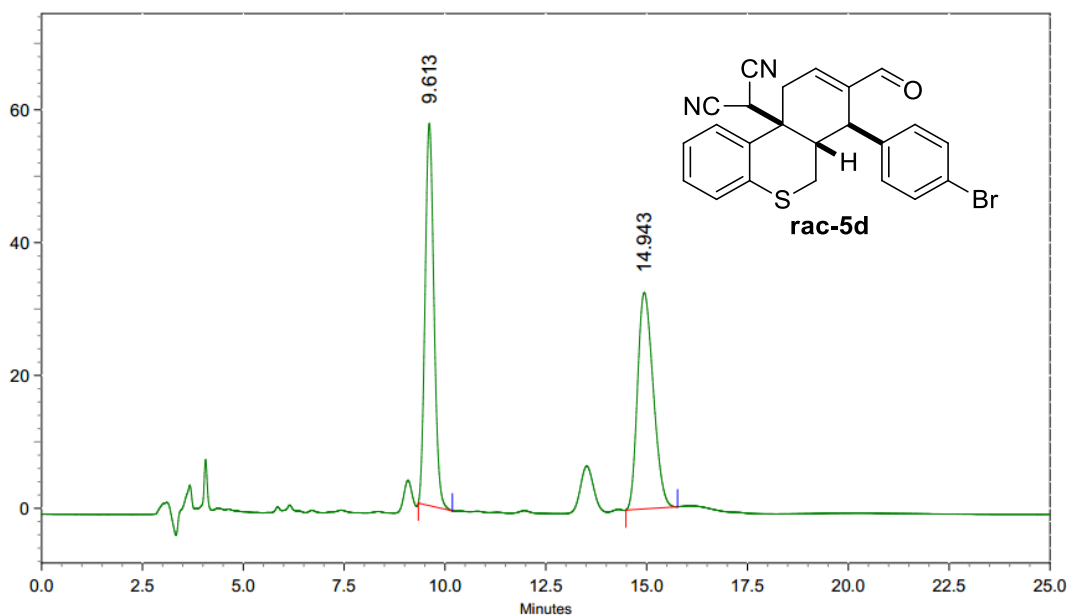

### AREA PERCENT REPORT

| Peak No. | Ret Time | Width | Height | Area     | Area [%] |
|----------|----------|-------|--------|----------|----------|
| 1        | 9.613    | 0.843 | 965619 | 14726867 | 49.8767  |
| 2        | 14.943   | 1.280 | 546357 | 14799707 | 50.1233  |

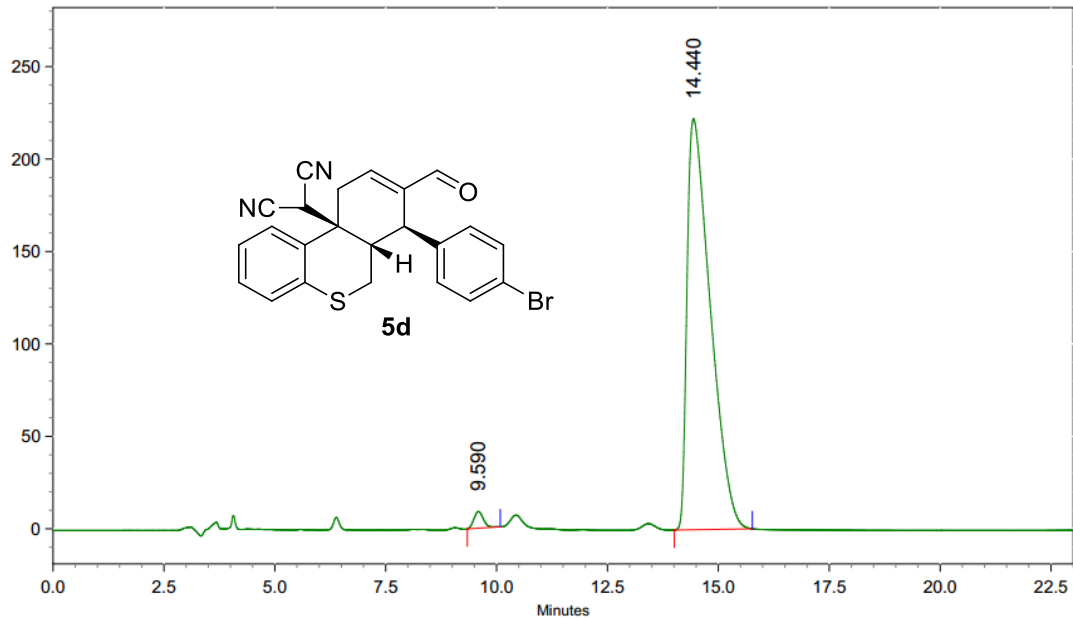

### AREA PERCENT REPORT

| Peak No. | Ret Time | Width | Height  | Area      | Area [%] |
|----------|----------|-------|---------|-----------|----------|
| 1        | 9.590    | 0.743 | 151395  | 2243914   | 1.6256   |
| 2        | 14.440   | 1.760 | 3728994 | 135795686 | 98.3744  |

GY-SE1-977 11 (0.282)

1: TOF MS ES+  
3.02e4

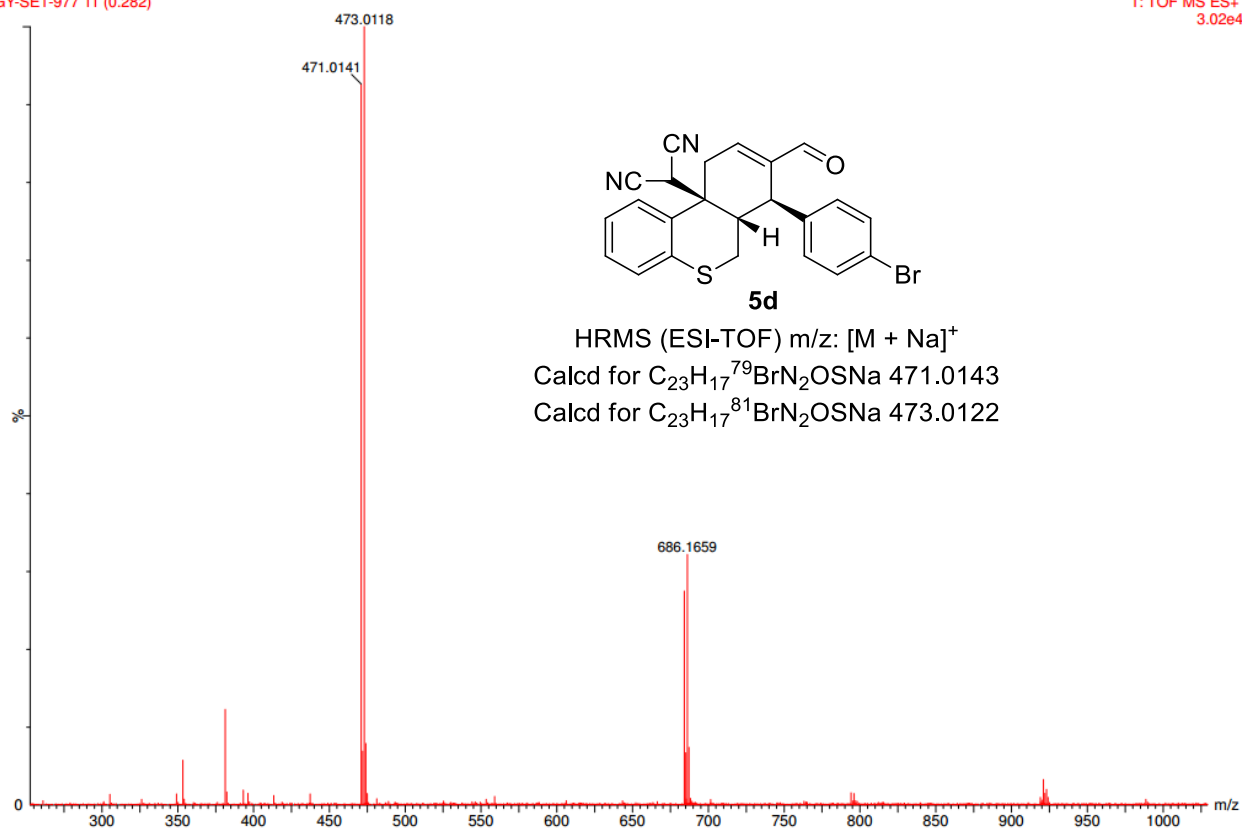

— 9.224

8.207  
8.186  
7.396  
7.376  
7.356  
7.297  
7.279  
7.179  
7.172  
7.157  
7.152  
7.143  
7.100  
7.084

— 4.350

3.761  
3.745  
3.637  
3.512  
3.486  
3.100  
3.040  
3.035  
3.014  
3.001  
3.000  
2.775  
2.691  
2.678  
2.656  
2.635

— 0.006

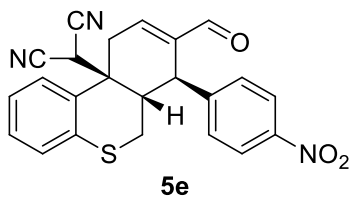

<sup>1</sup>H-NMR (400MHz, CDCl<sub>3</sub>)

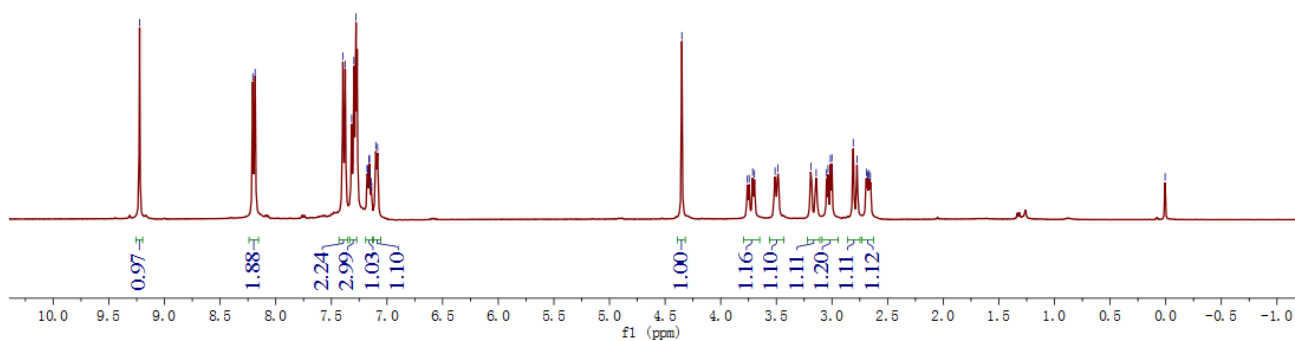

— 191.043

147.902  
147.305  
146.653  
132.021  
130.699  
129.894  
127.786  
127.598  
126.836  
124.171

— 110.584  
— 110.384

43.256  
41.387  
31.629  
31.281  
22.772

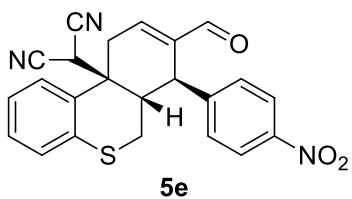

<sup>13</sup>C-NMR (100MHz, CDCl<sub>3</sub>)

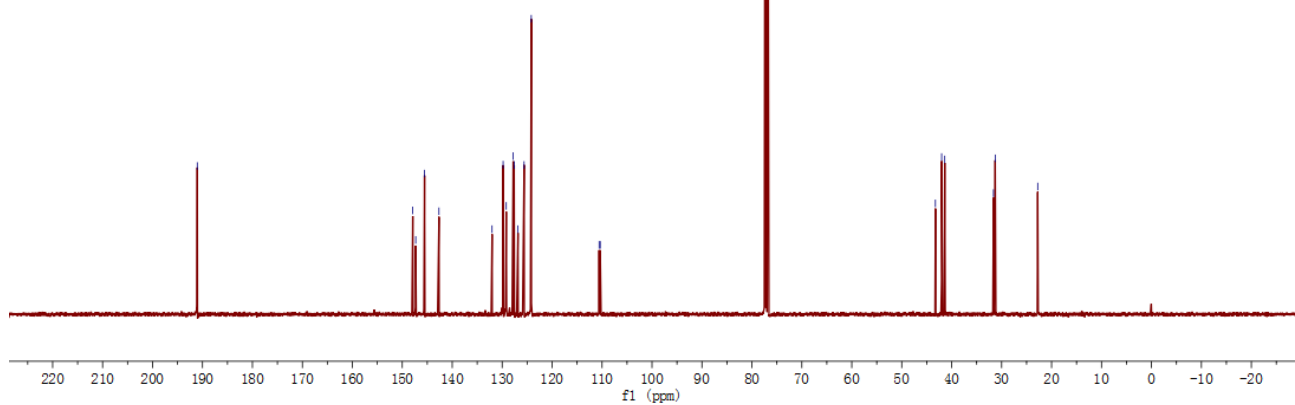

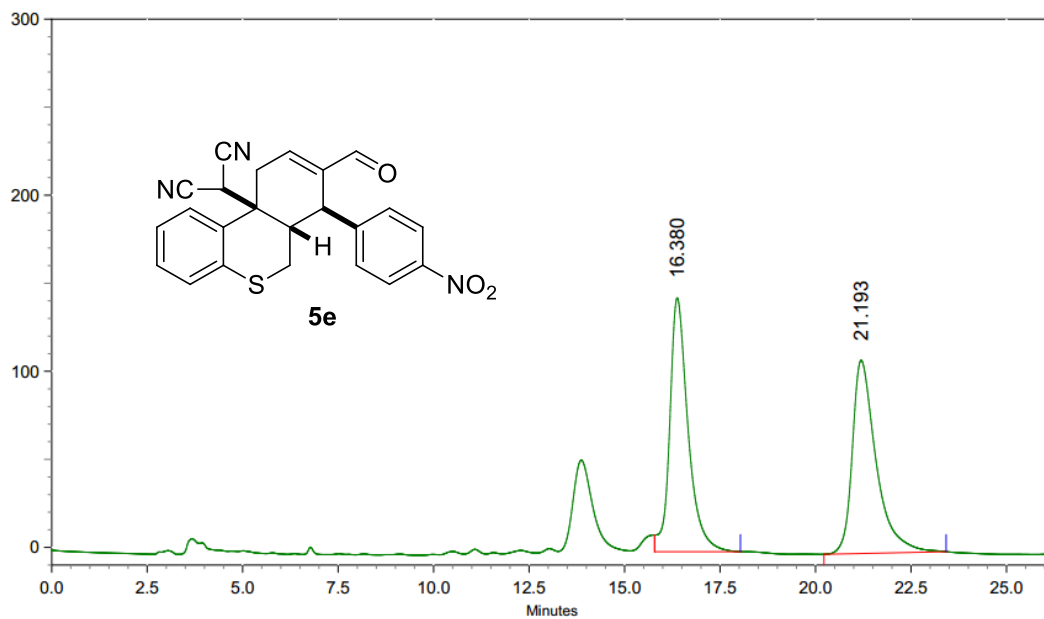

### AREA PERCENT REPORT

| Peak No. | Ret Time | Width | Height  | Area     | Area [%] |
|----------|----------|-------|---------|----------|----------|
| 1        | 16.380   | 2.247 | 2418504 | 80615197 | 50.1971  |
| 2        | 21.193   | 3.200 | 1840778 | 79982262 | 49.8029  |

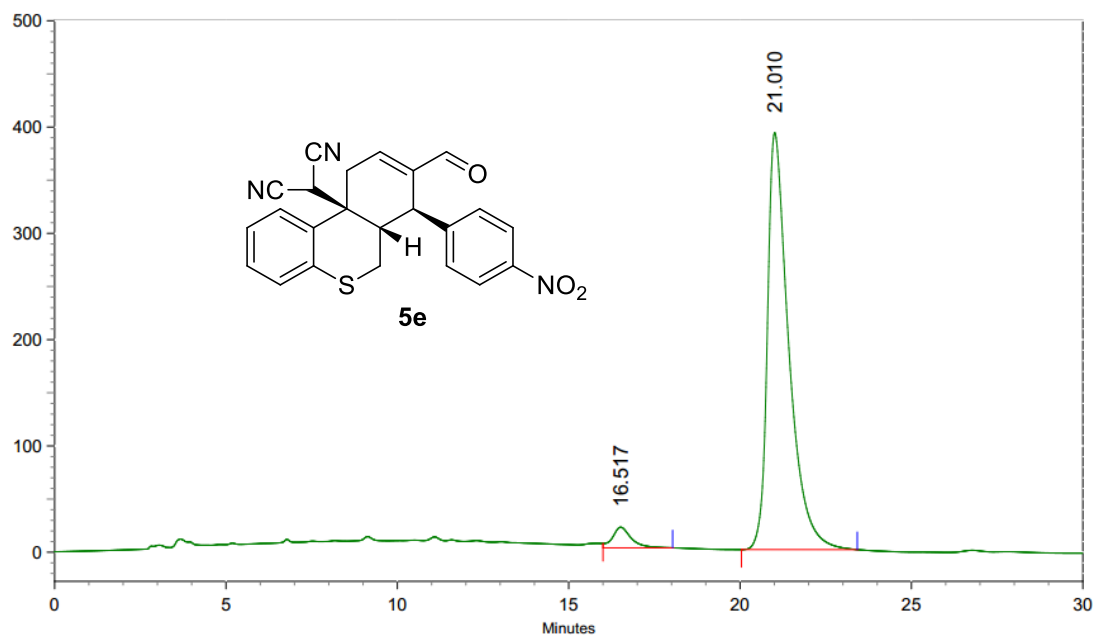

### AREA PERCENT REPORT

| Peak No. | Ret Time | Width | Height  | Area      | Area [%] |
|----------|----------|-------|---------|-----------|----------|
| 1        | 16.517   | 2.033 | 325781  | 12414739  | 4.1728   |
| 2        | 21.010   | 3.380 | 6579863 | 285098273 | 95.8272  |

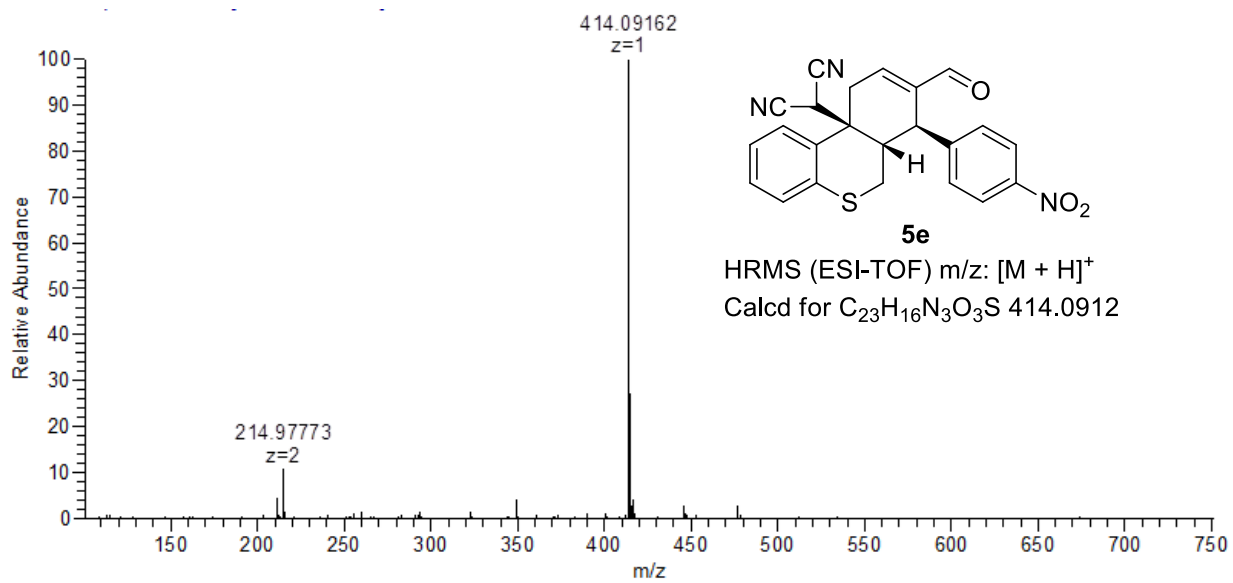



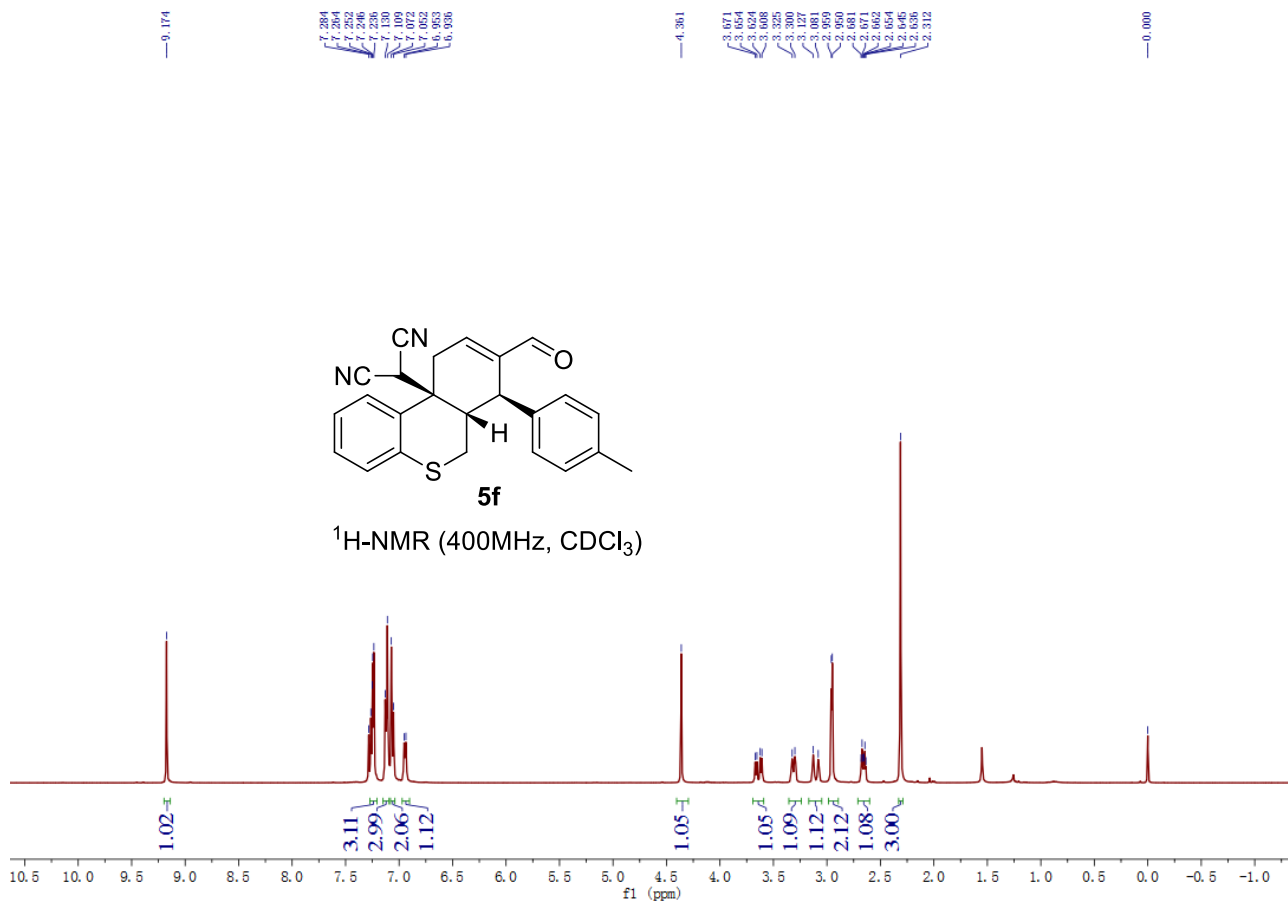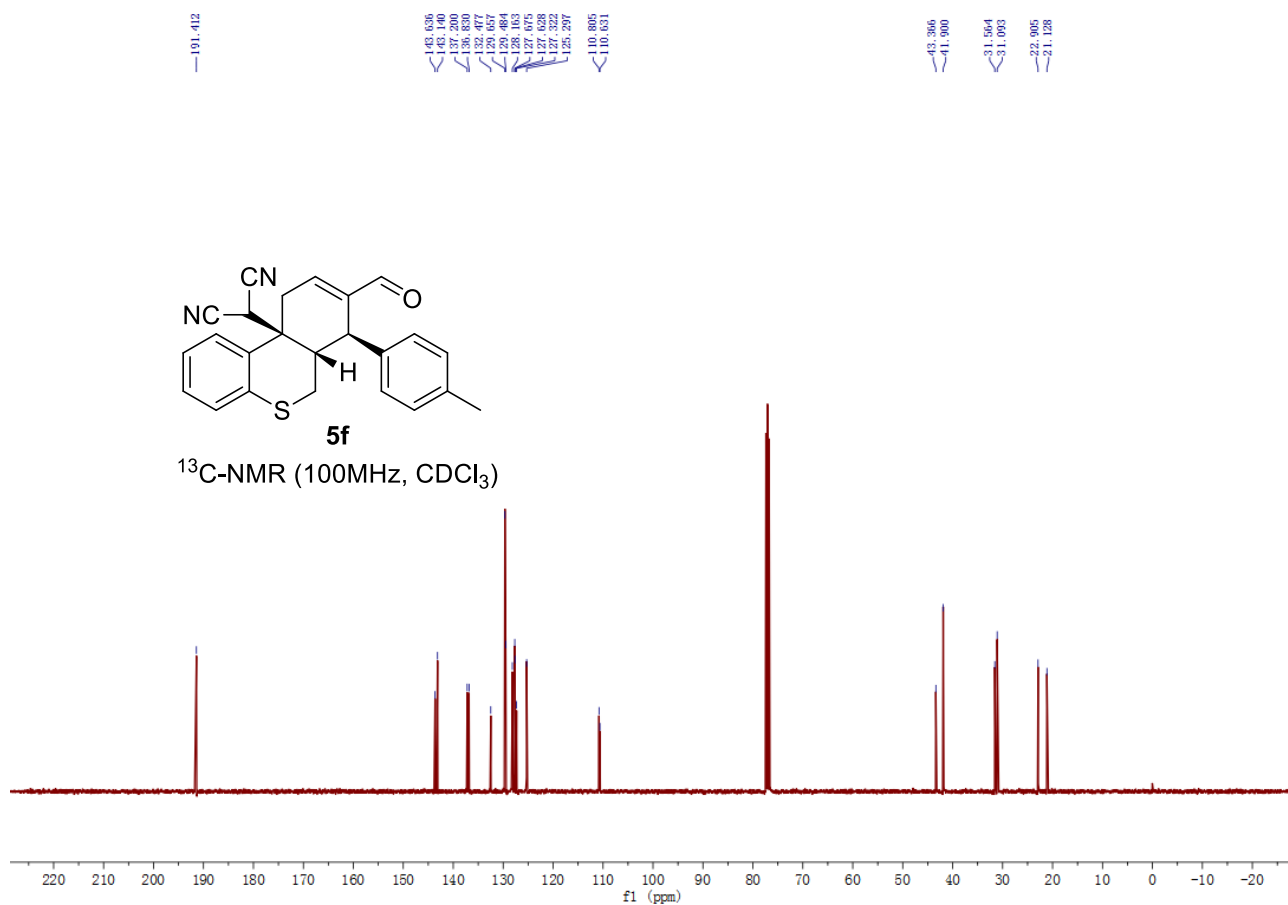

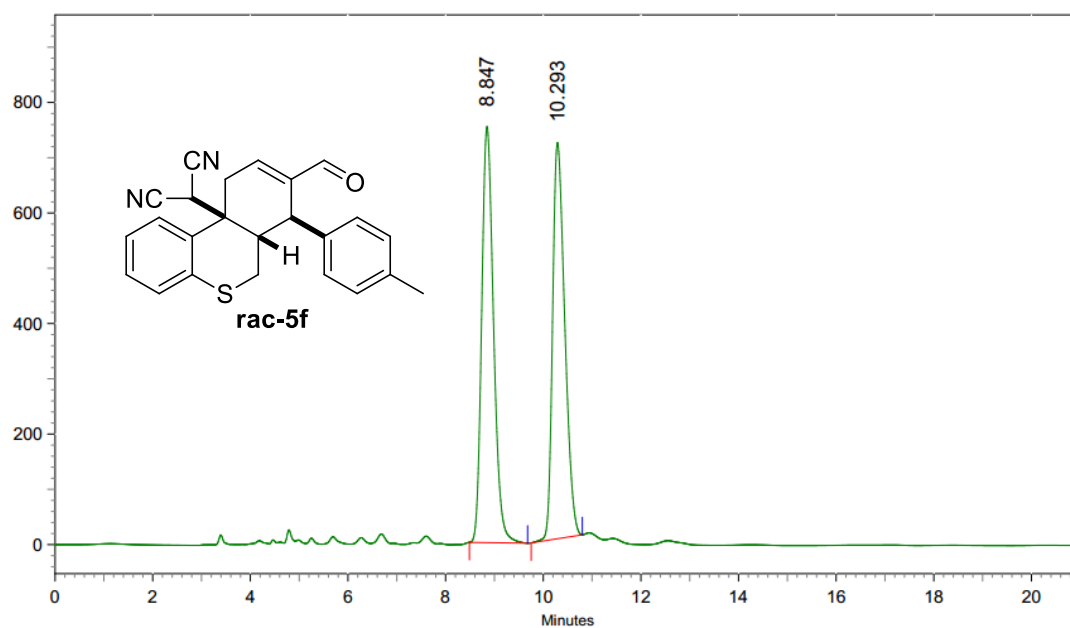

### AREA PERCENT REPORT

| Peak No. | Ret Time | Width | Height   | Area      | Area [%] |
|----------|----------|-------|----------|-----------|----------|
| 1        | 8.847    | 1.193 | 12627300 | 212568655 | 50.5630  |
| 2        | 10.293   | 1.047 | 12027011 | 207835062 | 49.4370  |

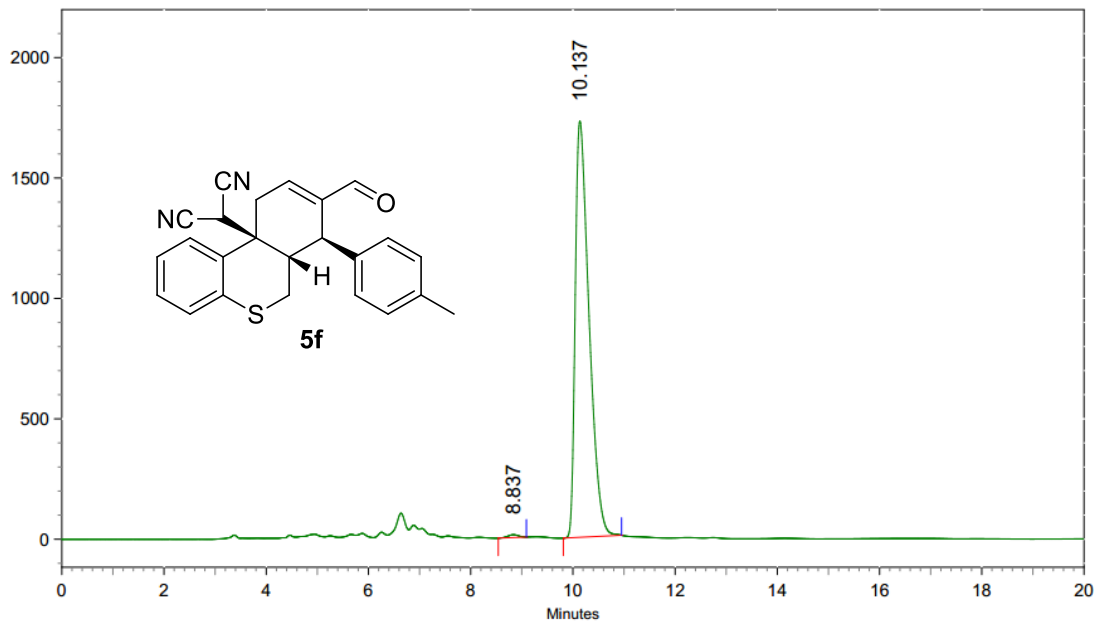

### AREA PERCENT REPORT

| Peak No. | Ret Time | Width | Height   | Area      | Area [%] |
|----------|----------|-------|----------|-----------|----------|
| 1        | 8.837    | 0.550 | 193193   | 2738285   | 0.5017   |
| 2        | 10.137   | 1.140 | 28996731 | 543057023 | 99.4983  |

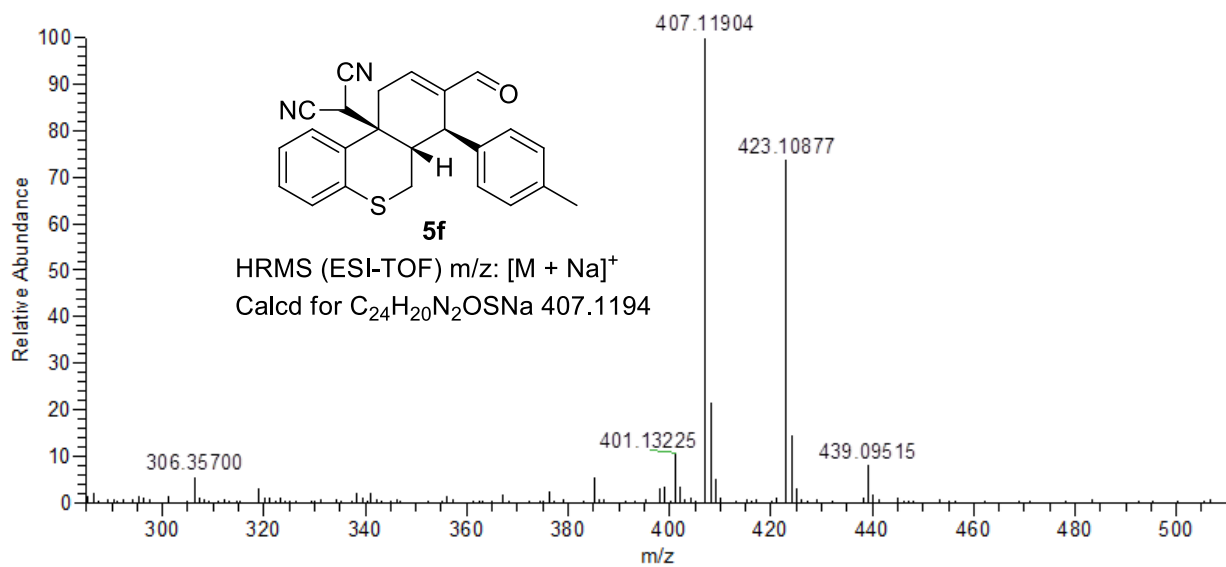

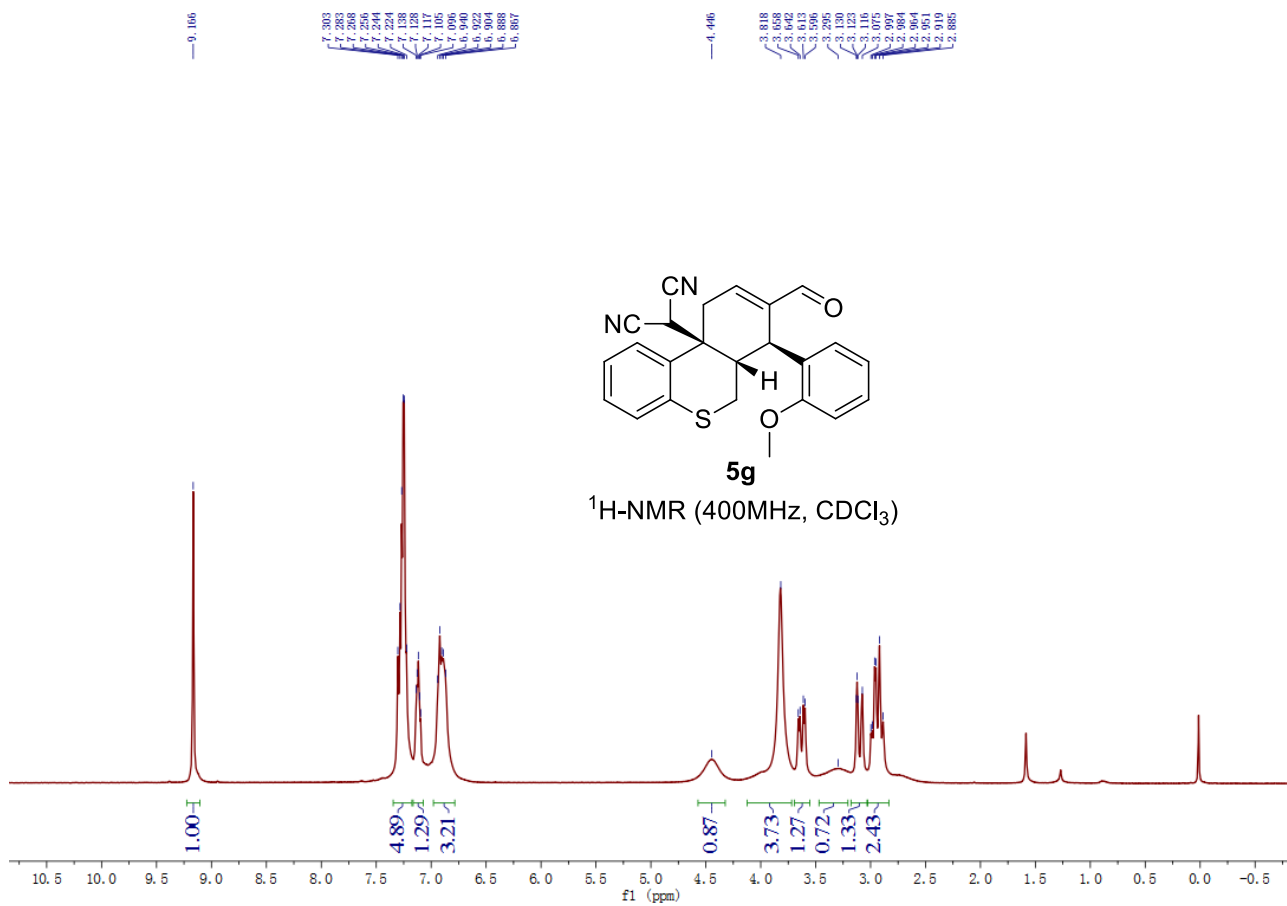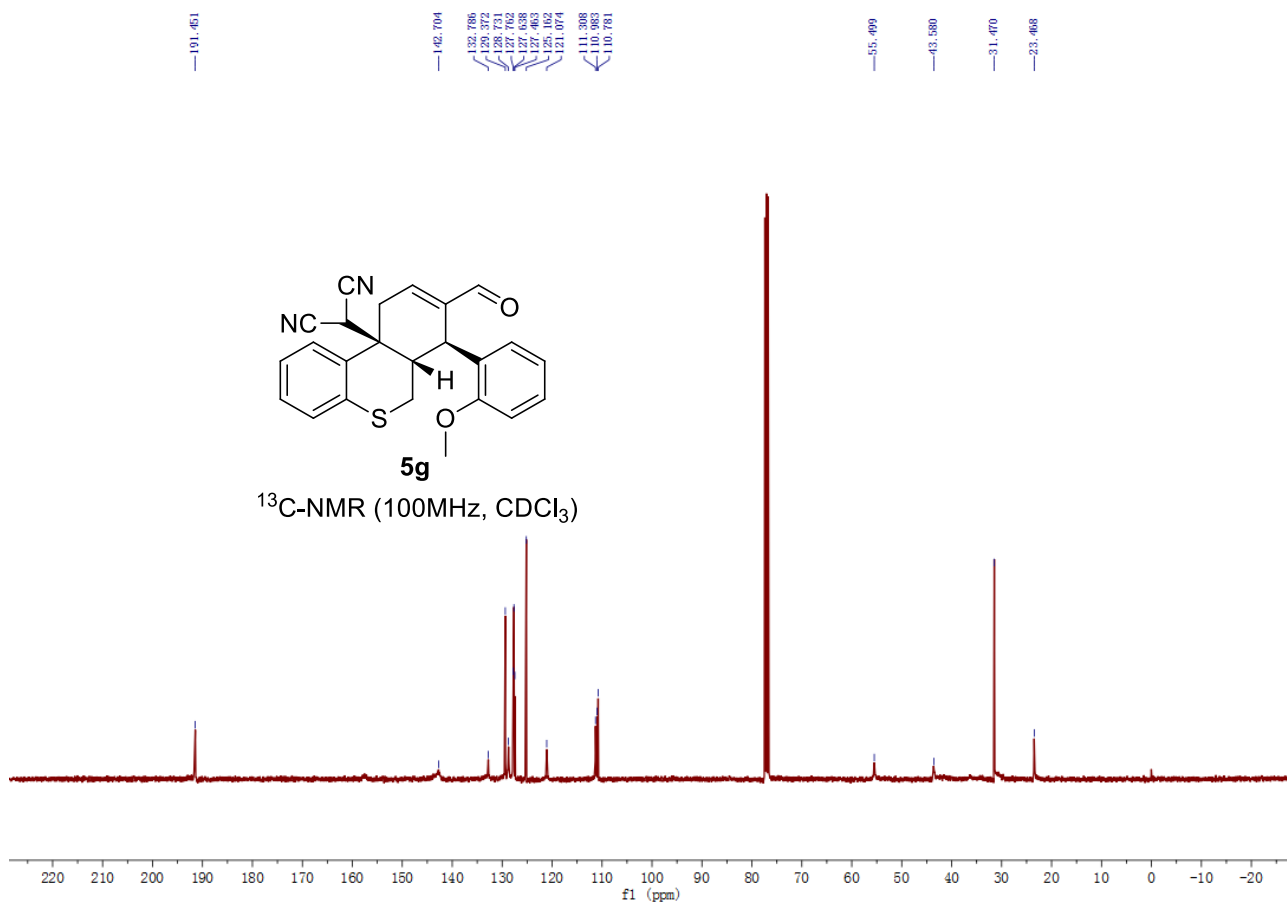

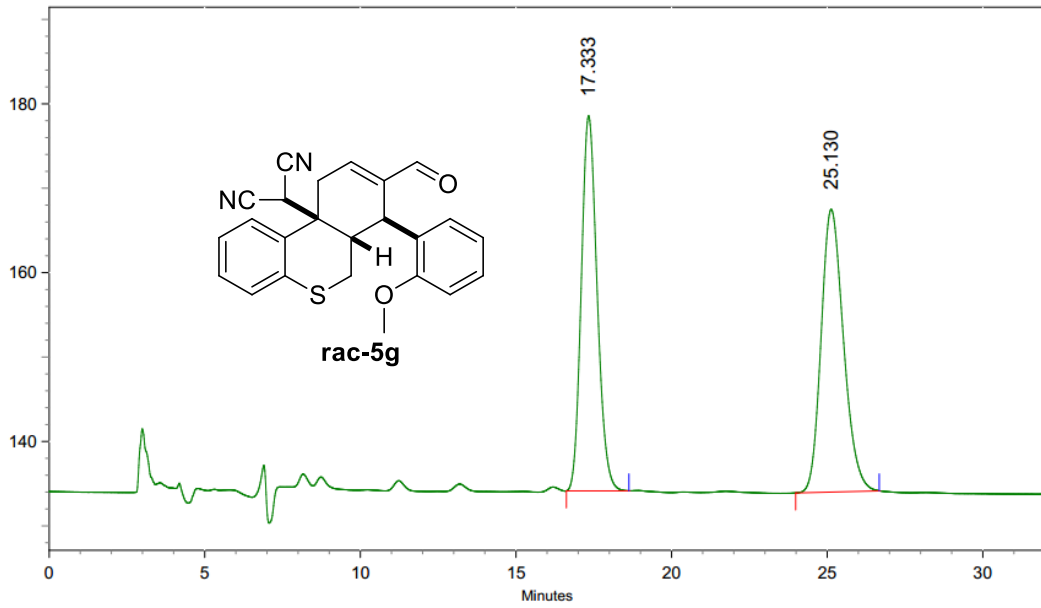

### AREA PERCENT REPORT

| Peak No. | Ret Time | Width | Height | Area     | Area [%] |
|----------|----------|-------|--------|----------|----------|
| 1        | 17.333   | 2.010 | 745531 | 26338573 | 48.3732  |
| 2        | 25.130   | 2.687 | 561890 | 28110145 | 51.6268  |

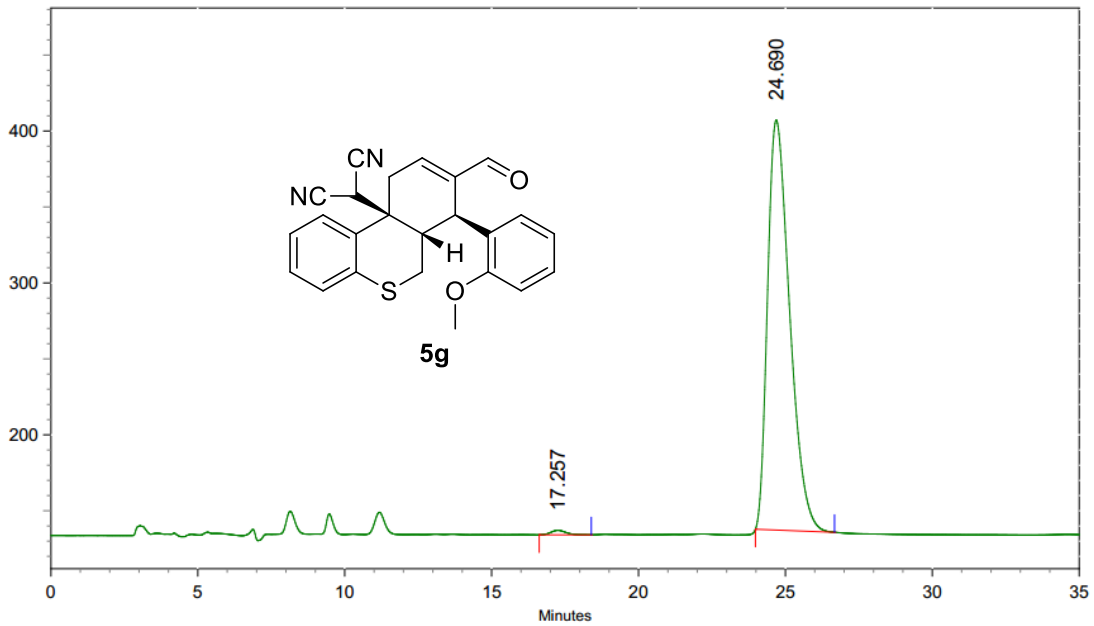

### AREA PERCENT REPORT

| Peak No. | Ret Time | Width | Height  | Area      | Area [%] |
|----------|----------|-------|---------|-----------|----------|
| 1        | 17.257   | 1.773 | 50013   | 1763779   | 0.7402   |
| 2        | 24.690   | 2.693 | 4528479 | 236509529 | 99.2598  |

# Spectrum Plot Report

|                |                   |              |       |            |              |                   |                                   |
|----------------|-------------------|--------------|-------|------------|--------------|-------------------|-----------------------------------|
| Name           | CYC-20191215-37   | Rack Pos.    |       | Instrument | Instrument 1 | Operator          |                                   |
| Inj. Vol. (ul) | 10                | Plate Pos.   |       | IRM Status | Success      | Acq. Time (Local) | 12/20/2019 3:53:20 PM (UTC+08:00) |
| Data File      | CYC-20191215-37.d | Method (Acq) | TOF.m | Comment    |              |                   |                                   |

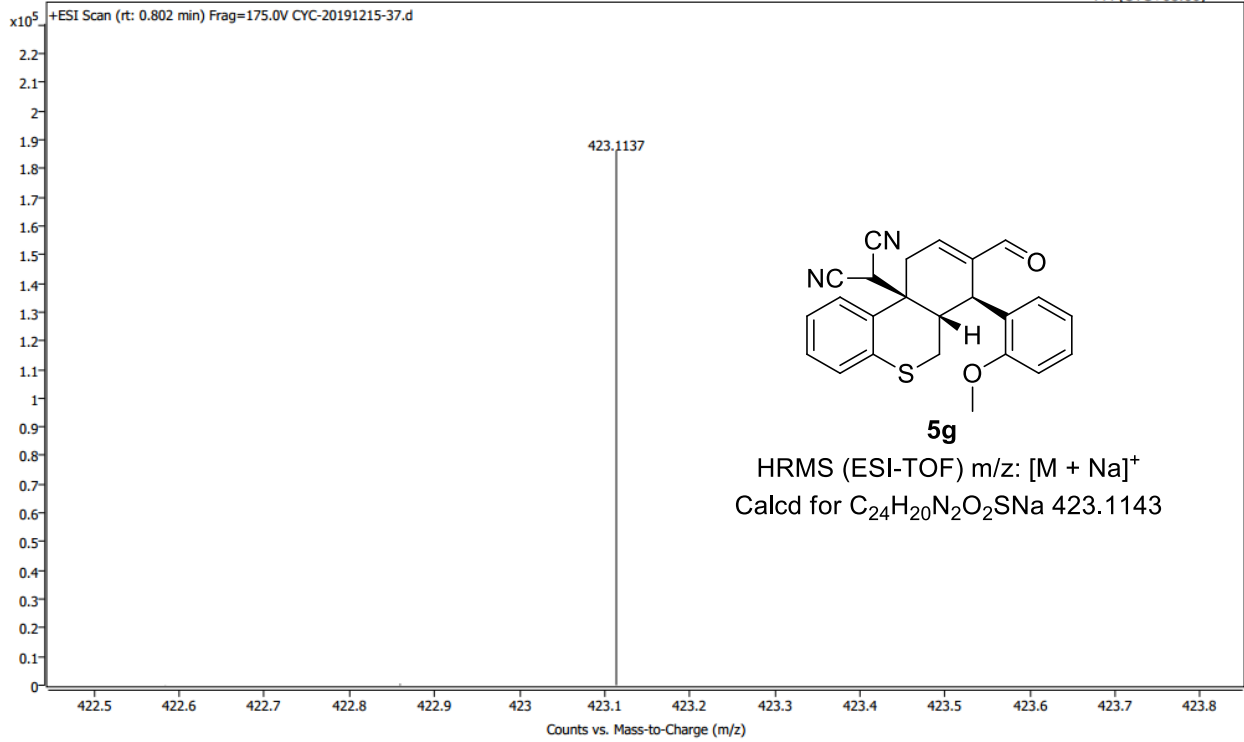

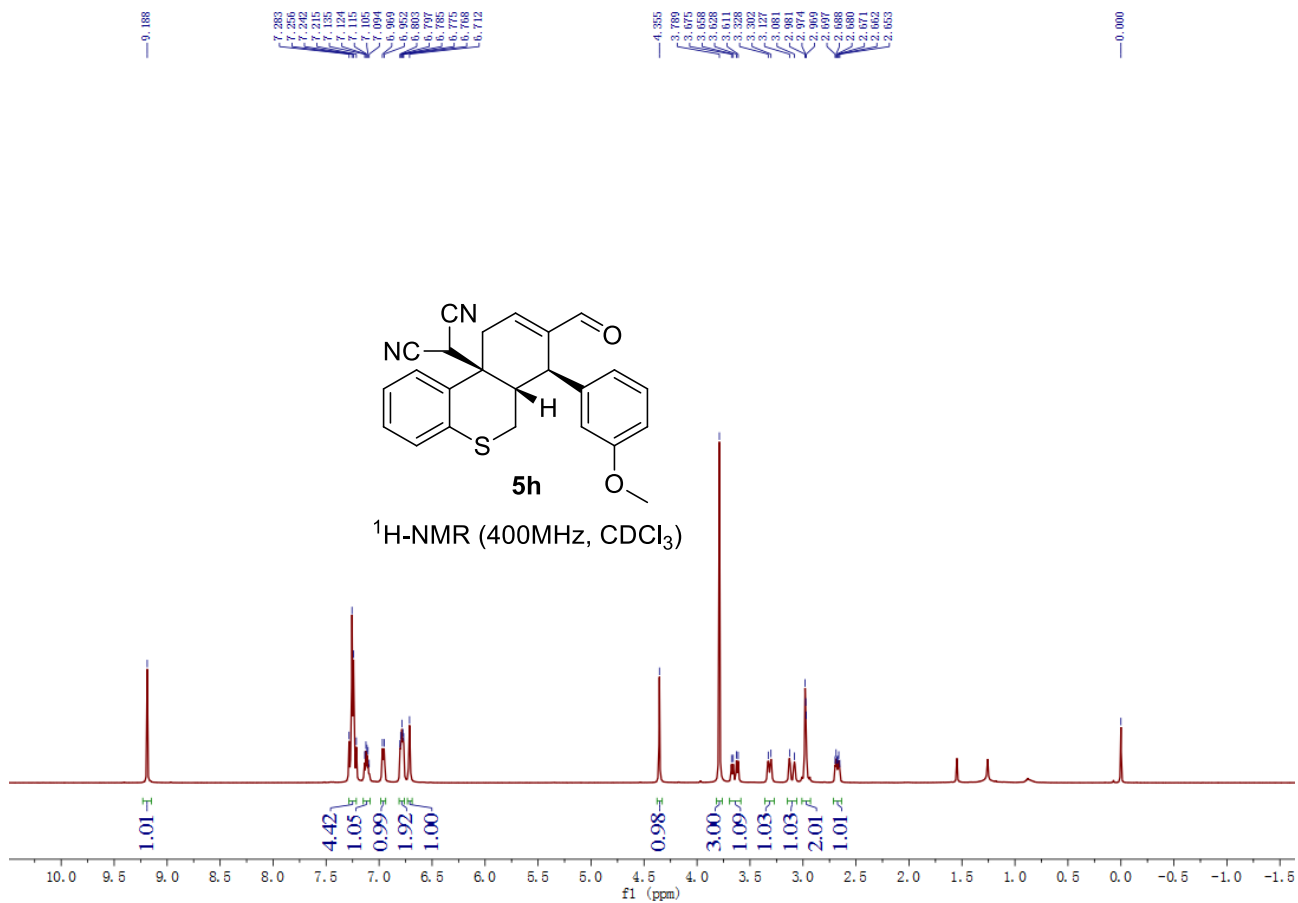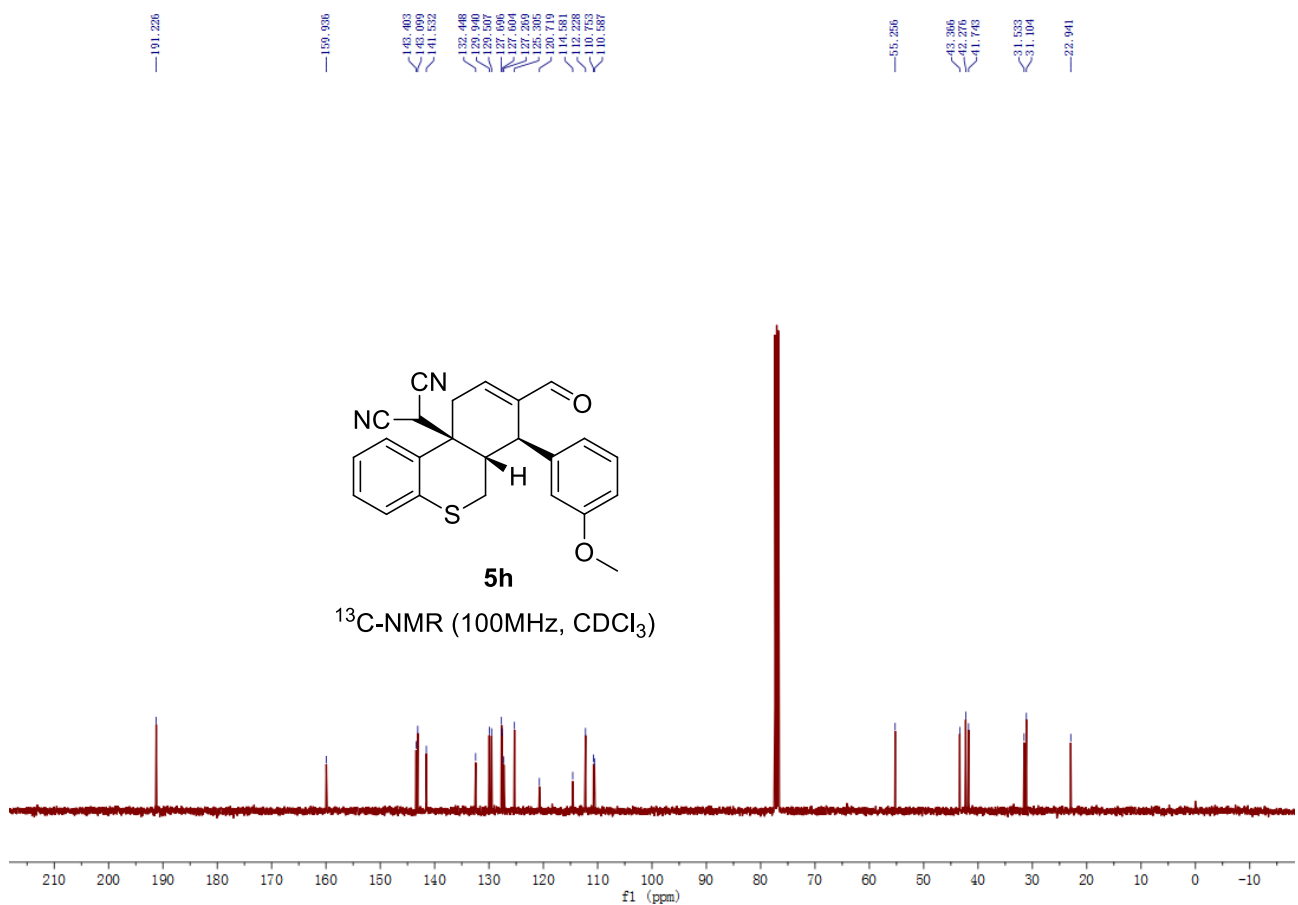

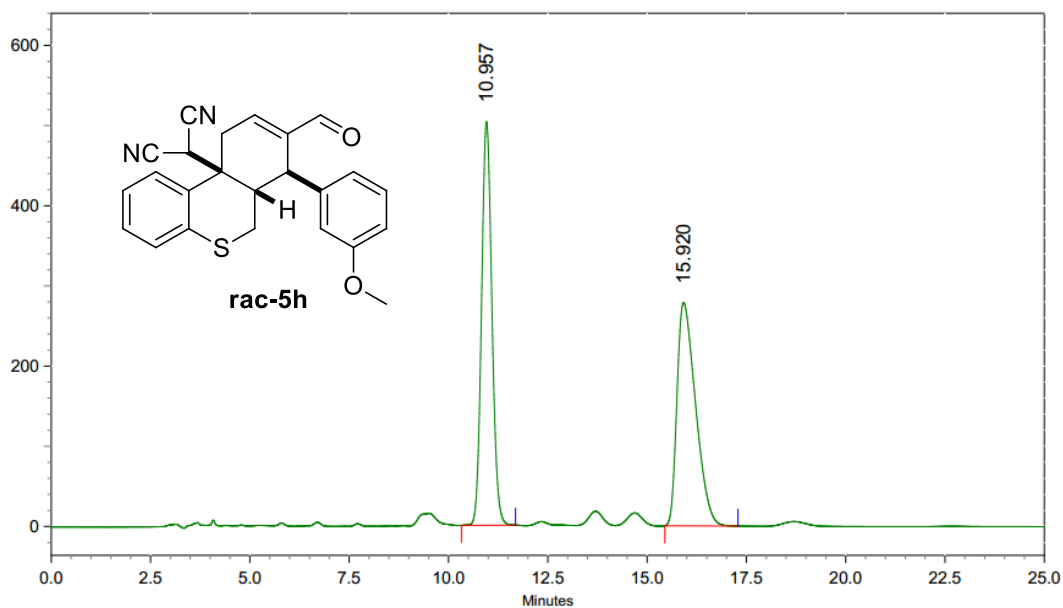

**AREA PERCENT REPORT**

| Peak No. | Ret Time | Width | Height  | Area      | Area [%] |
|----------|----------|-------|---------|-----------|----------|
| 1        | 10.957   | 1.360 | 8444780 | 153227894 | 50.2324  |
| 2        | 15.920   | 1.840 | 4674183 | 151810219 | 49.7676  |

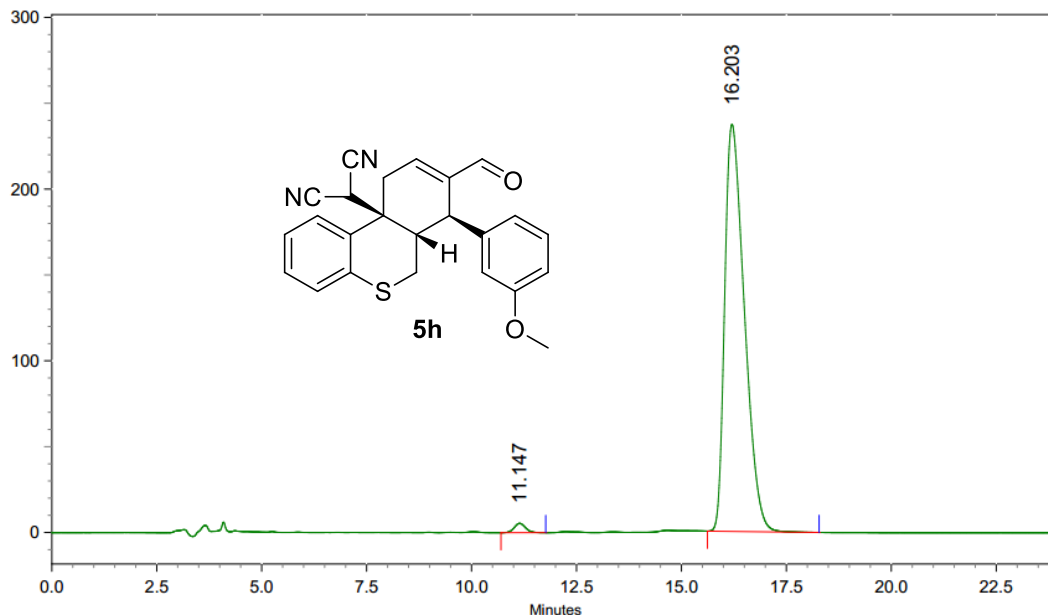

**AREA PERCENT REPORT**

| Peak No. | Ret Time | Width | Height  | Area      | Area [%] |
|----------|----------|-------|---------|-----------|----------|
| 1        | 11.147   | 1.067 | 90838   | 1691916   | 1.2888   |
| 2        | 16.203   | 2.660 | 3977075 | 129587048 | 98.7112  |



GY-SE6-977 12 (0.299)

1: TOF MS ES+  
1.28e4

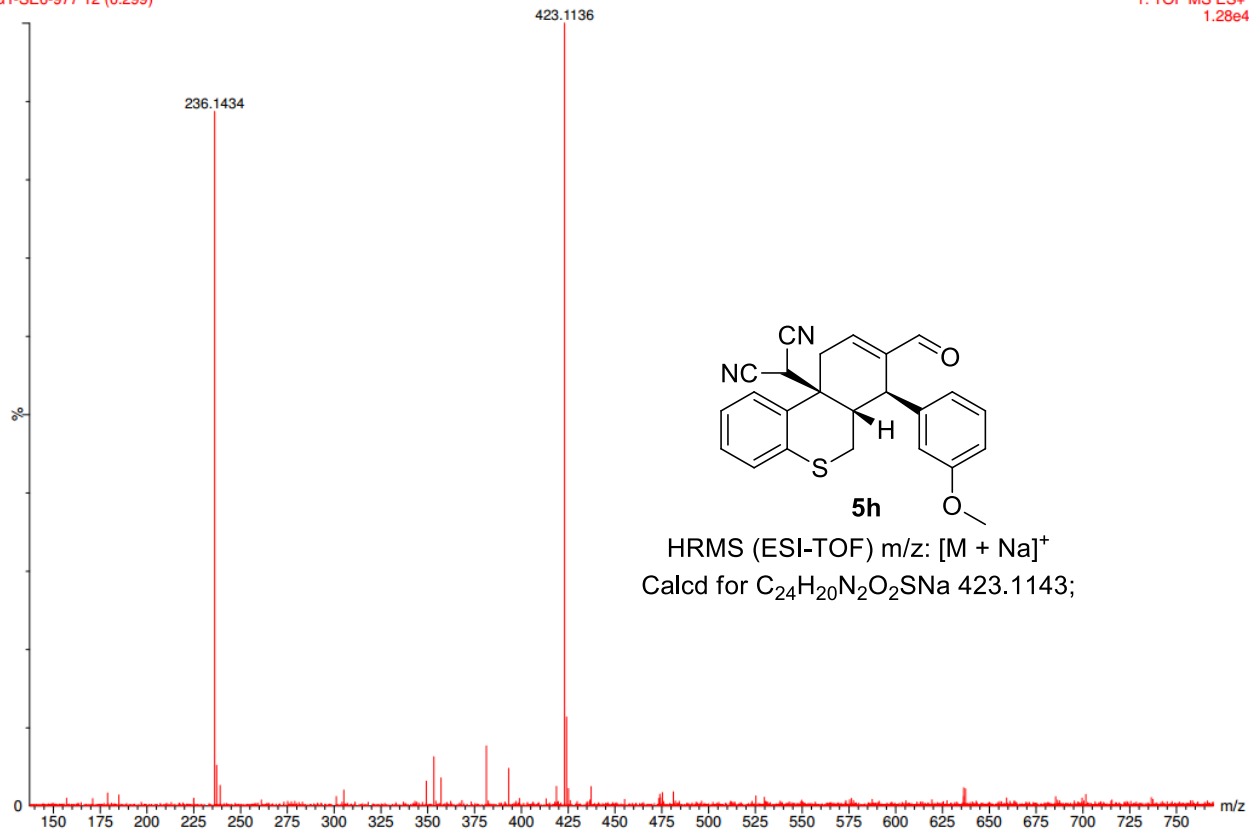

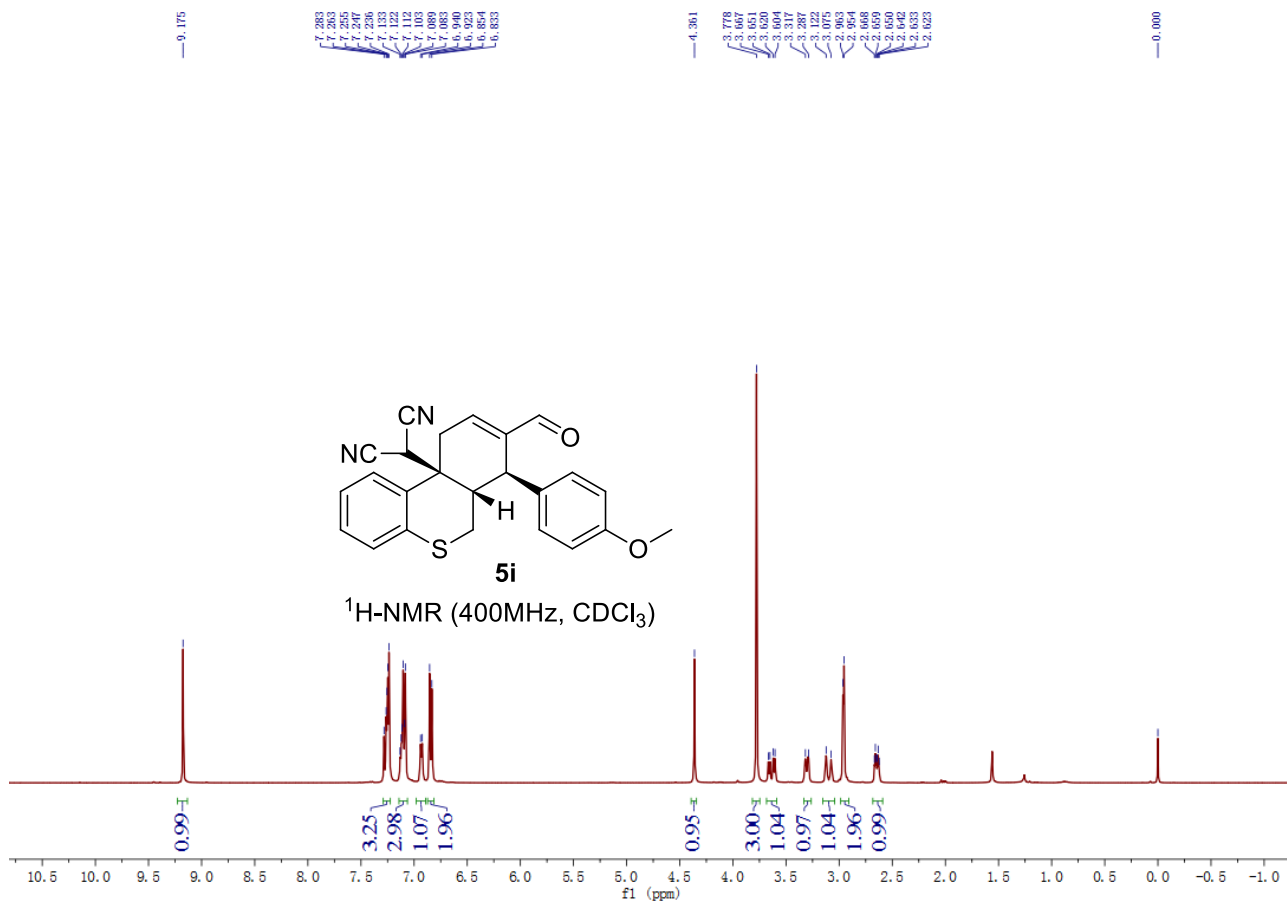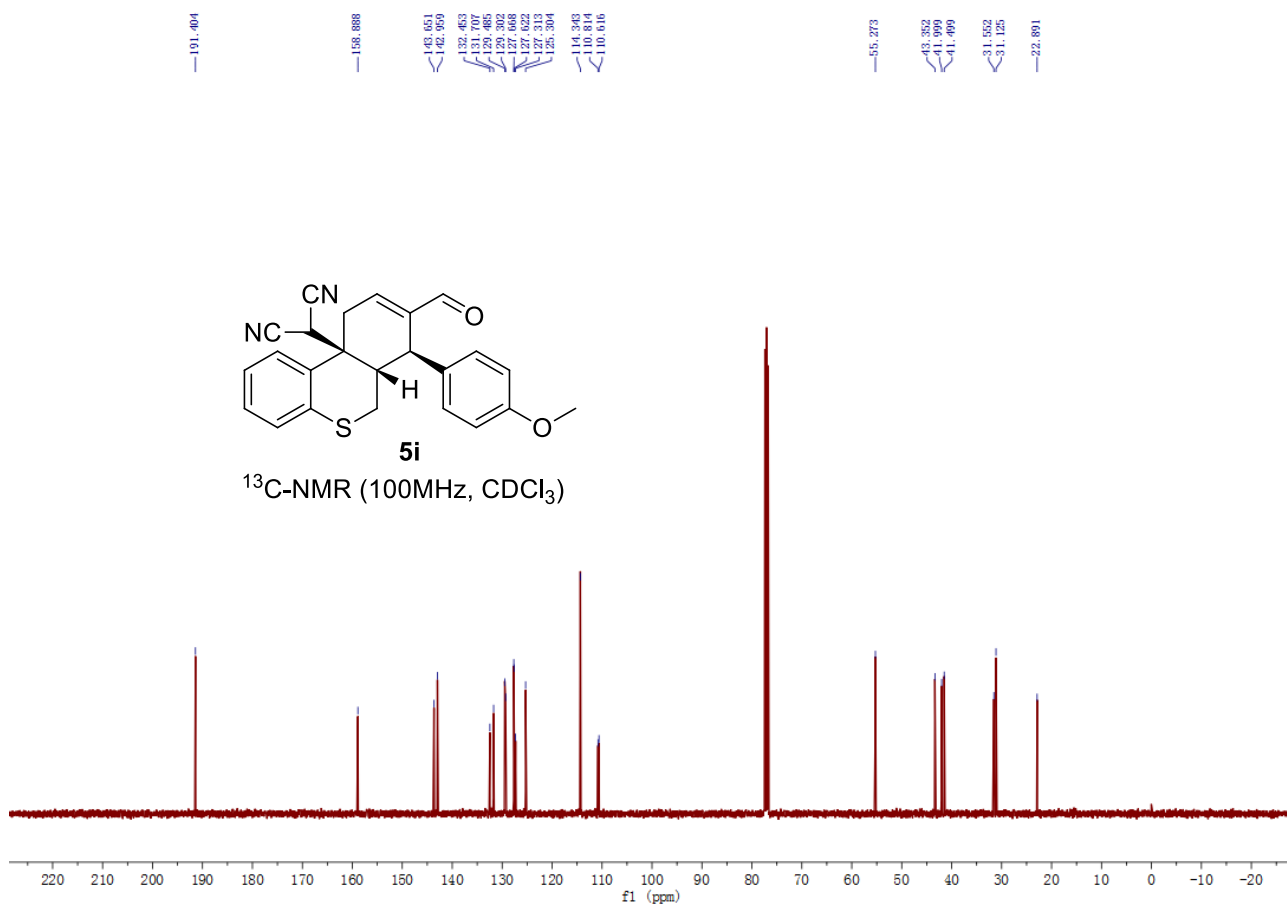

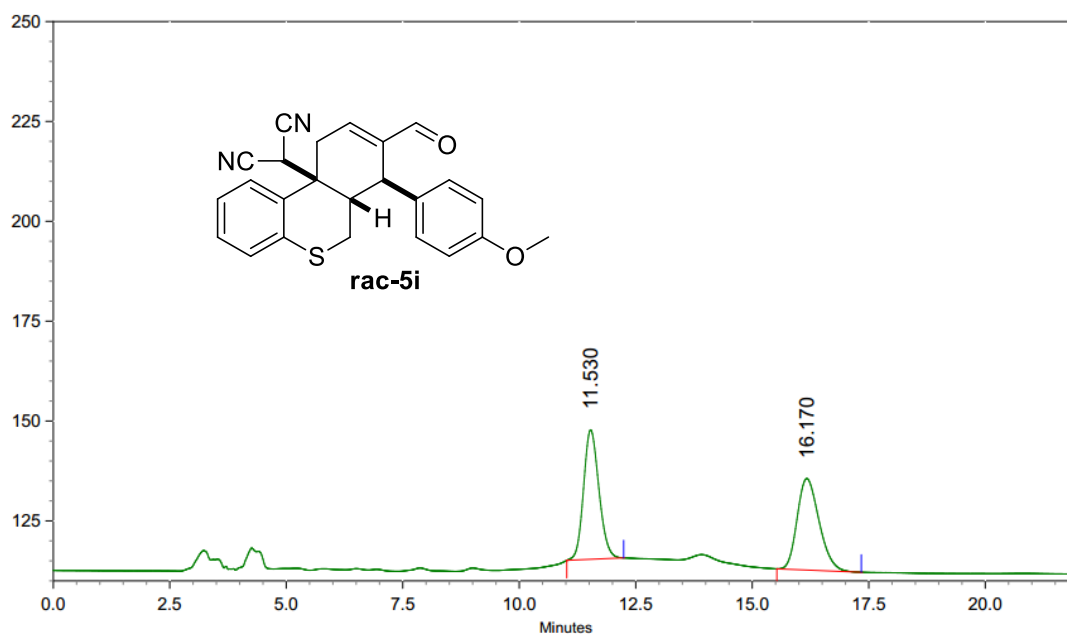

### AREA PERCENT REPORT

| Peak No. | Ret Time | Width | Height | Area     | Area [%] |
|----------|----------|-------|--------|----------|----------|
| 1        | 11.530   | 1.220 | 543649 | 12495122 | 49.8220  |
| 2        | 16.170   | 1.813 | 384107 | 12584423 | 50.1780  |

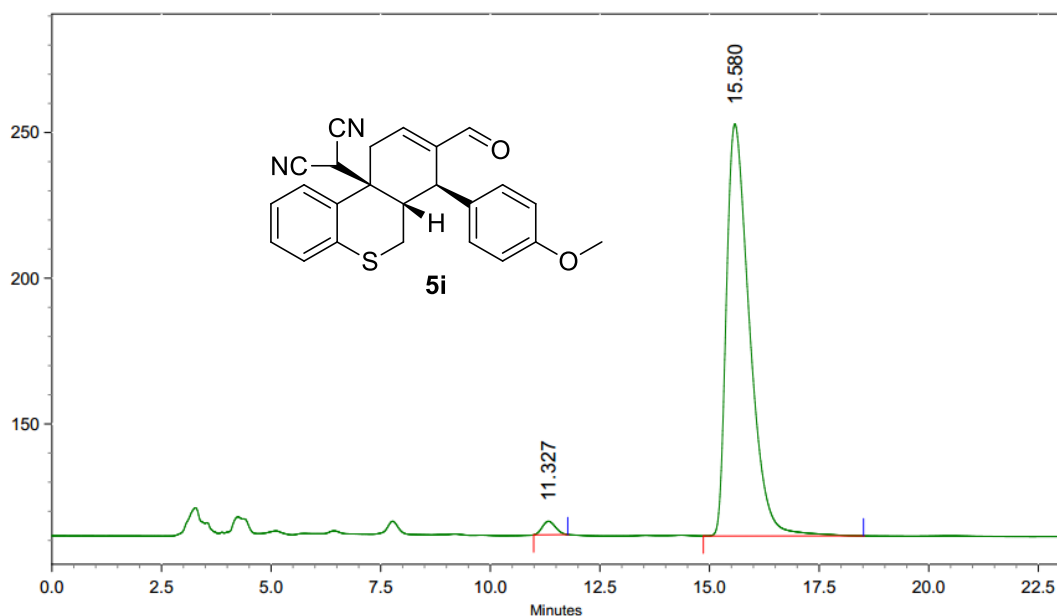

### AREA PERCENT REPORT

| Peak No. | Ret Time | Width | Height  | Area     | Area [%] |
|----------|----------|-------|---------|----------|----------|
| 1        | 11.327   | 0.777 | 77795   | 1628720  | 1.8429   |
| 2        | 15.580   | 3.653 | 2372209 | 86749209 | 98.1571  |

# Spectrum Plot Report

|                |                   |              |       |            |              |                                  |
|----------------|-------------------|--------------|-------|------------|--------------|----------------------------------|
| Name           | CYC-20191124-20   | Rack Pos.    |       | Instrument | Instrument 1 | Operator                         |
| Inj. Vol. (ul) | 10                | Plate Pos.   |       | IRM Status | Success      |                                  |
| Data File      | CYC-20191124-20.d | Method (Acq) | TOF.m | Comment    |              | Acq. Time (Local)                |
|                |                   |              |       |            |              | 12/5/2019 6:24:56 PM (UTC+08:00) |

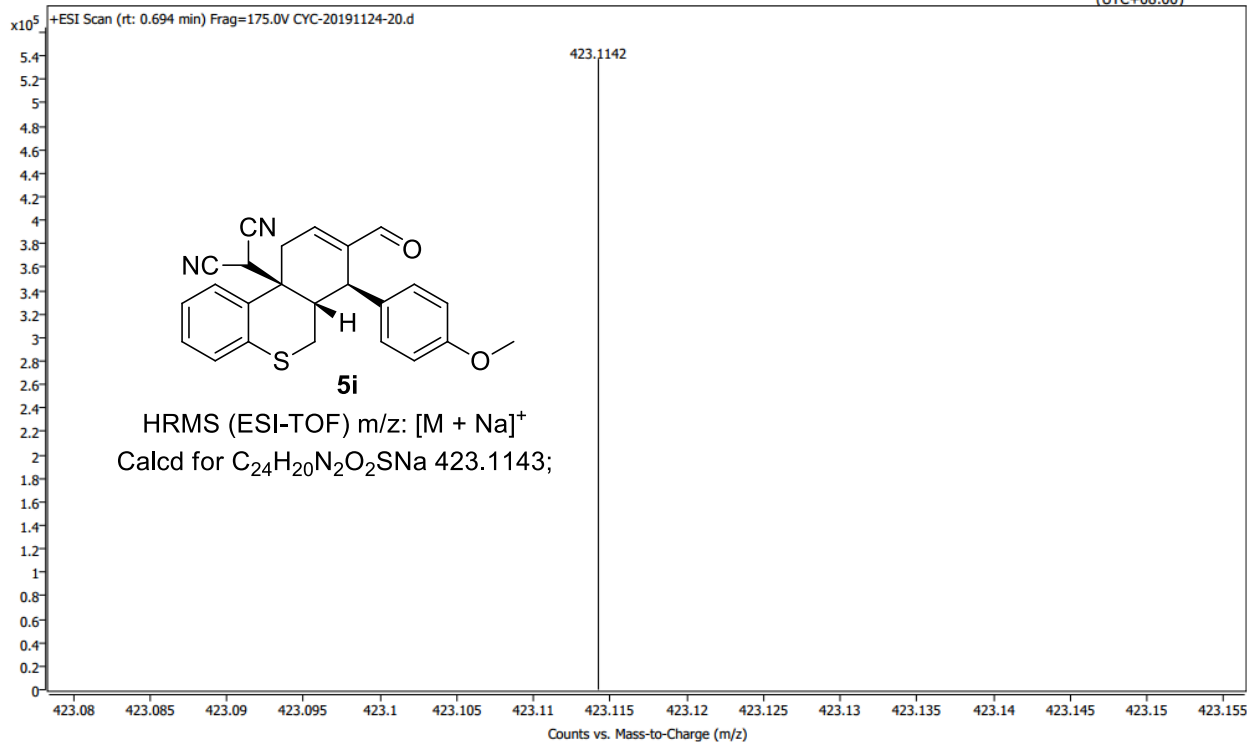

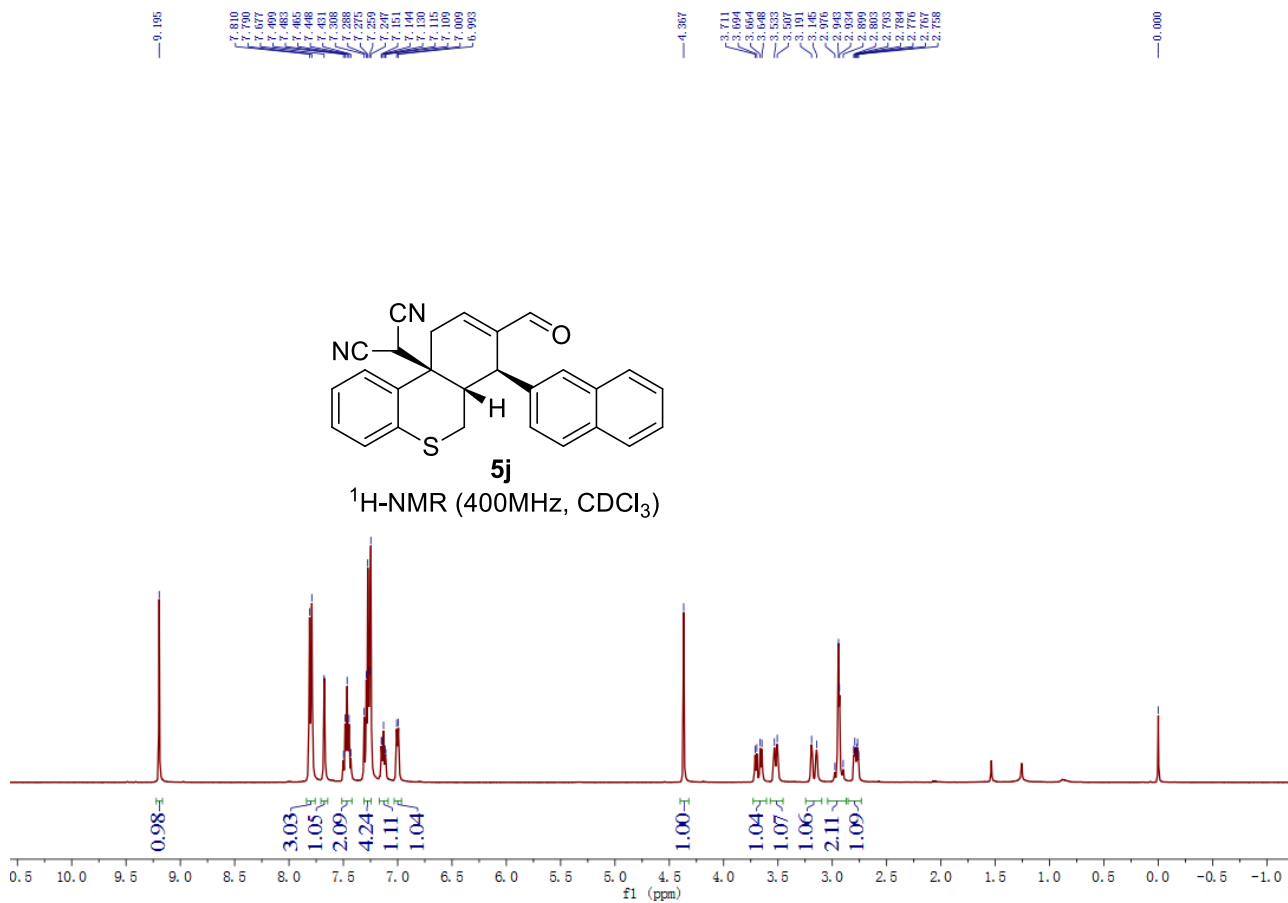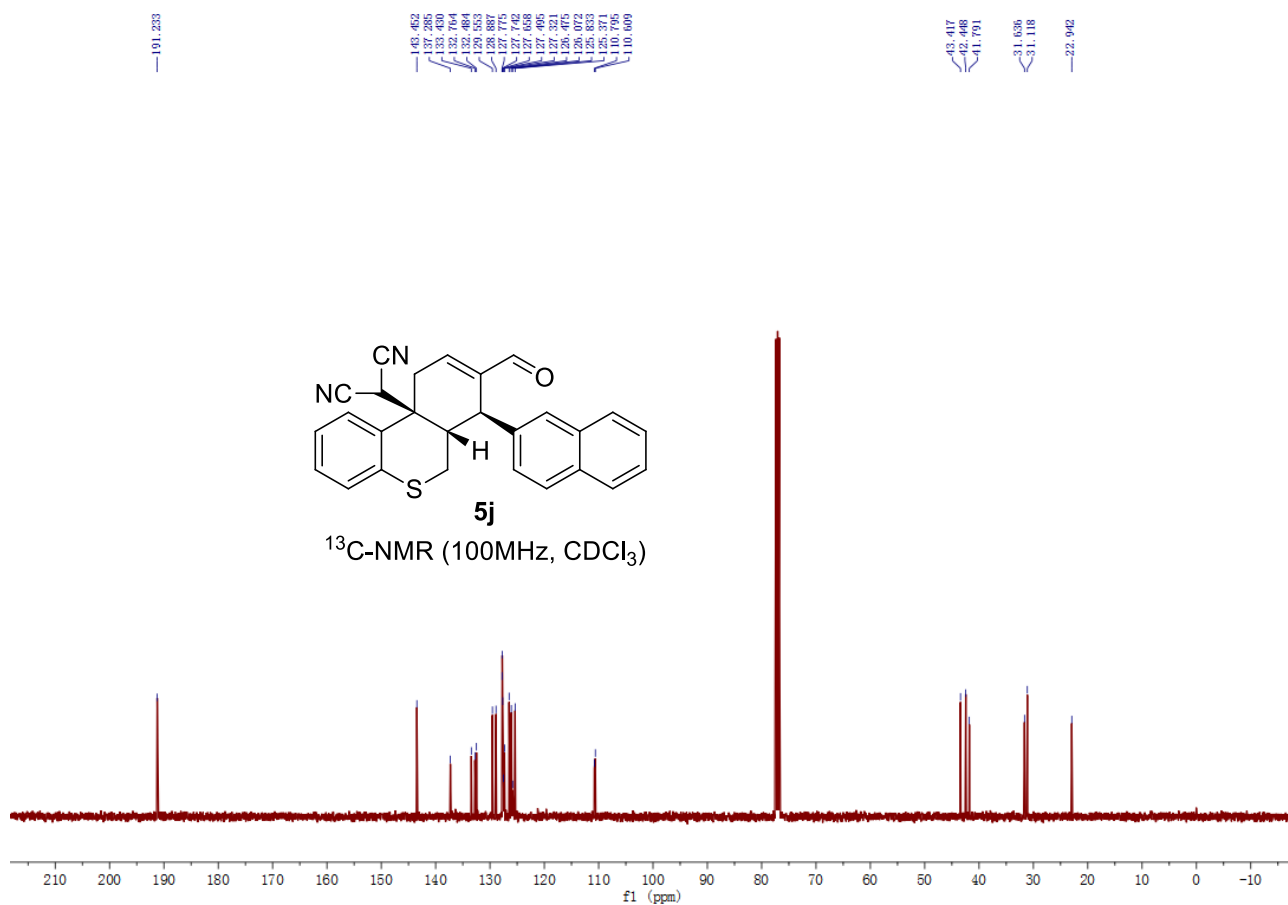

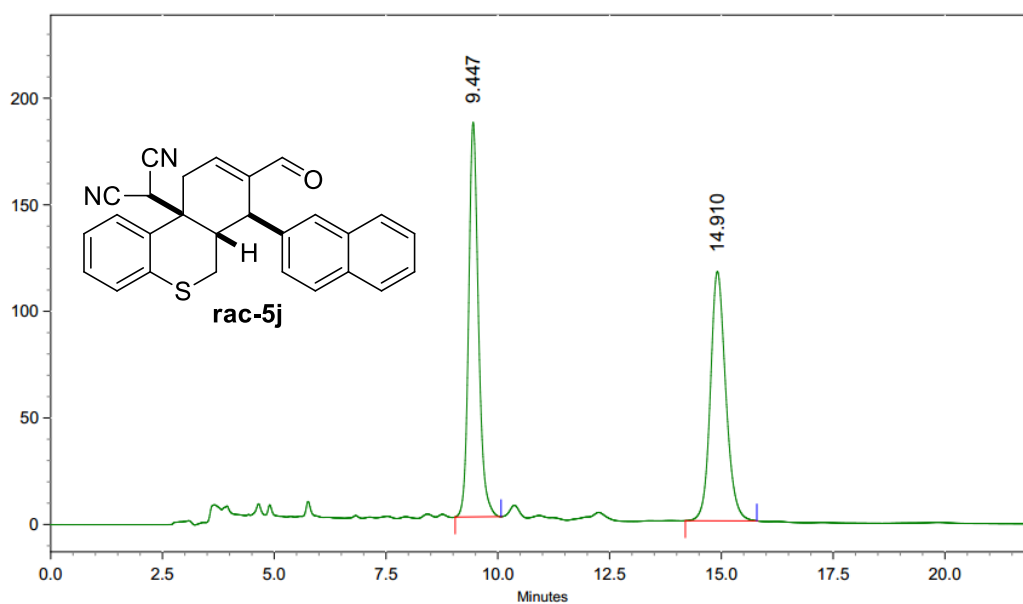

**AREA PERCENT REPORT**

| Peak No. | Ret Time | Width | Height  | Area     | Area [%] |
|----------|----------|-------|---------|----------|----------|
| 1        | 9.447    | 1.027 | 3105805 | 47249504 | 50.1853  |
| 2        | 14.910   | 1.600 | 1962717 | 46900547 | 49.8147  |

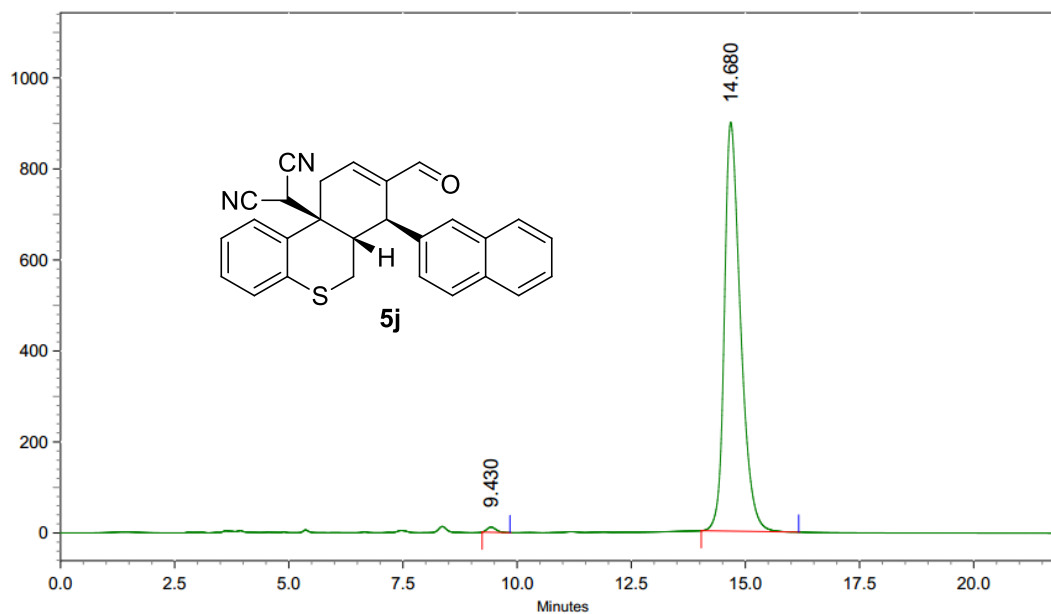

**AREA PERCENT REPORT**

| Peak No. | Ret Time | Width | Height   | Area      | Area [%] |
|----------|----------|-------|----------|-----------|----------|
| 1        | 9.430    | 0.610 | 191829   | 2625011   | 0.7032   |
| 2        | 14.680   | 2.133 | 15072484 | 370676964 | 99.2968  |

GY-SE8-978 12 (0.299)

1: TOF MS ES+  
2.92e4

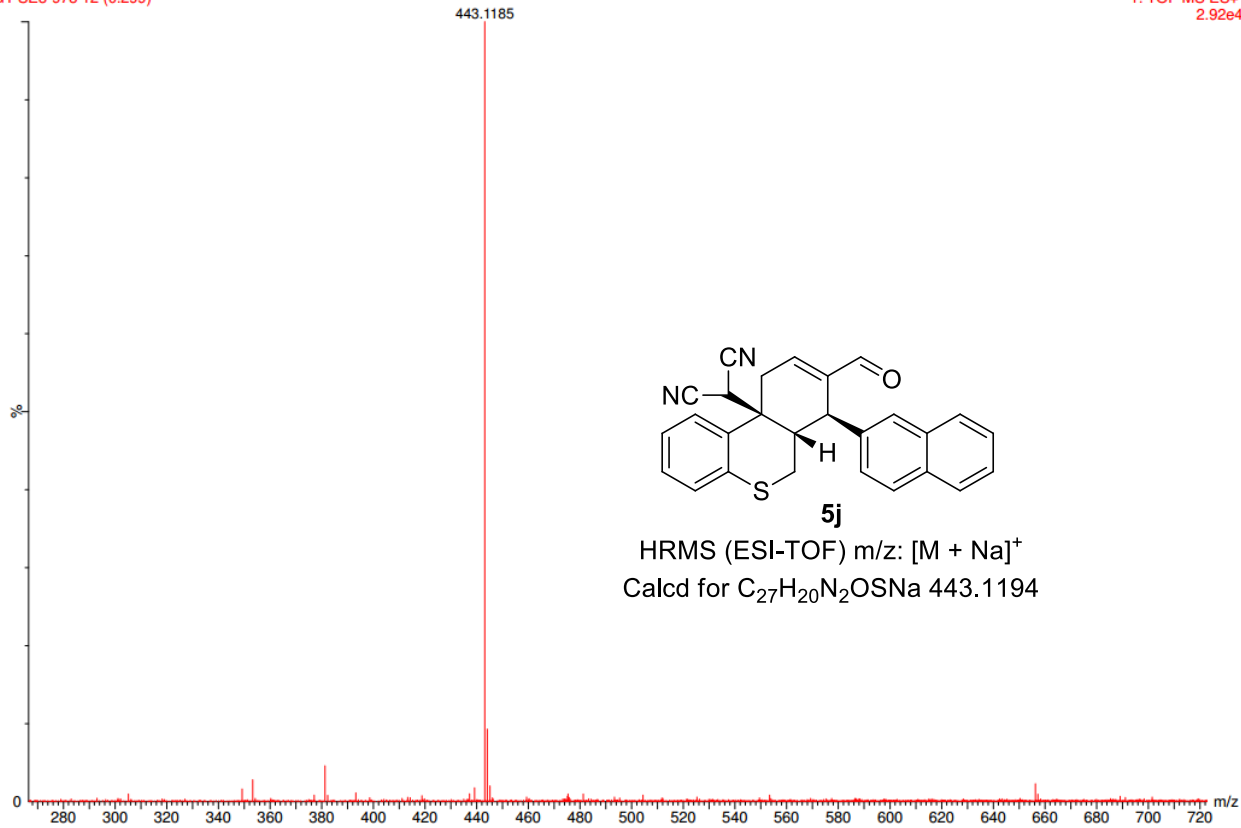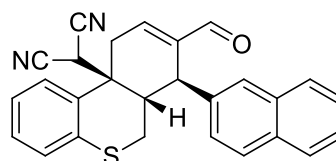

**5j**

HRMS (ESI-TOF) m/z: [M + Na]<sup>+</sup>  
Calcd for C<sub>27</sub>H<sub>20</sub>N<sub>2</sub>OSNa 443.1194

-0.219

7.271  
7.257  
7.249  
7.243  
7.201  
7.191  
7.138  
7.130  
7.117  
7.110  
7.104  
7.096  
6.978  
6.957  
6.948  
6.945  
6.921  
6.905

-4.384

3.718  
3.698  
3.660  
3.643  
3.612  
3.595  
3.102  
3.099  
3.075  
3.052  
3.041  
2.784  
2.779  
2.765  
2.757  
2.752  
2.739

-0.000

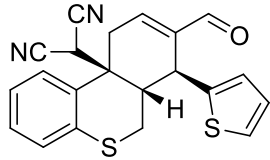

5k

<sup>1</sup>H-NMR (400MHz, CDCl<sub>3</sub>)

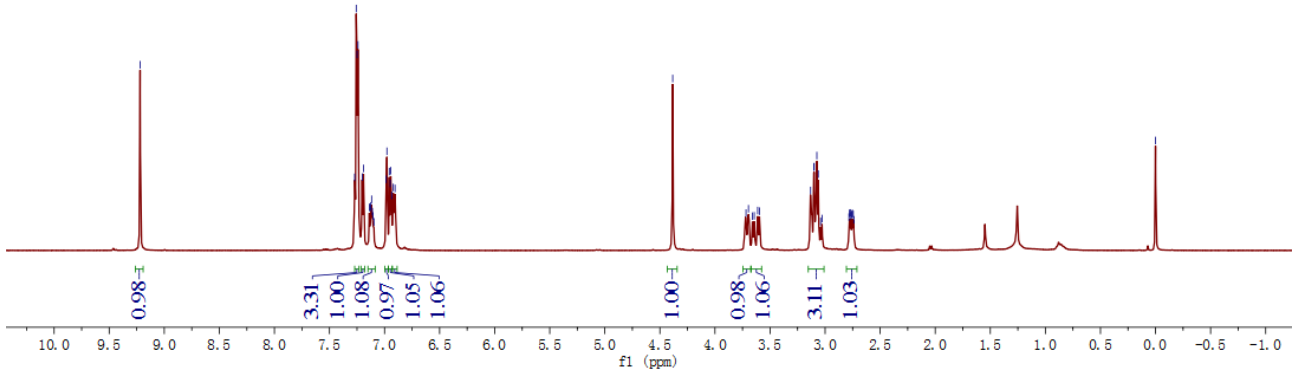

-100.901

142.839  
142.499  
142.345  
142.345  
129.016  
127.788  
127.631  
127.095  
126.906  
125.387  
124.859

110.881  
110.479

42.451  
42.620  
37.610  
31.413  
31.110

23.106

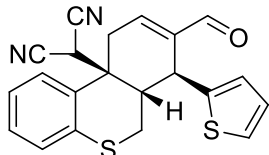

5k

<sup>13</sup>C-NMR (100MHz, CDCl<sub>3</sub>)

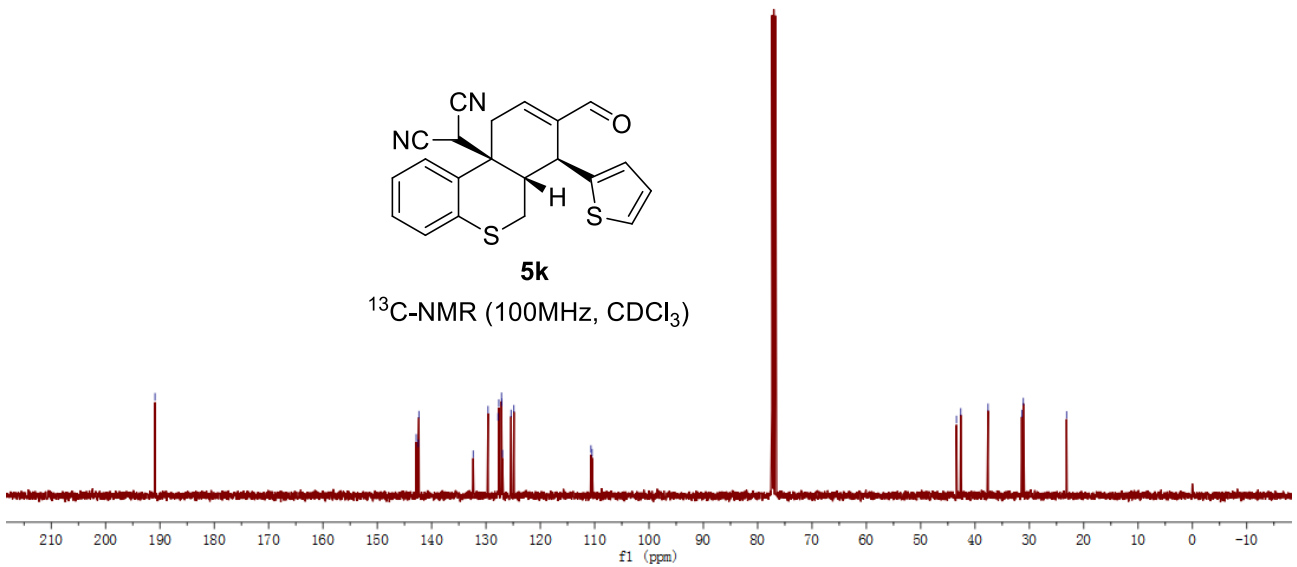



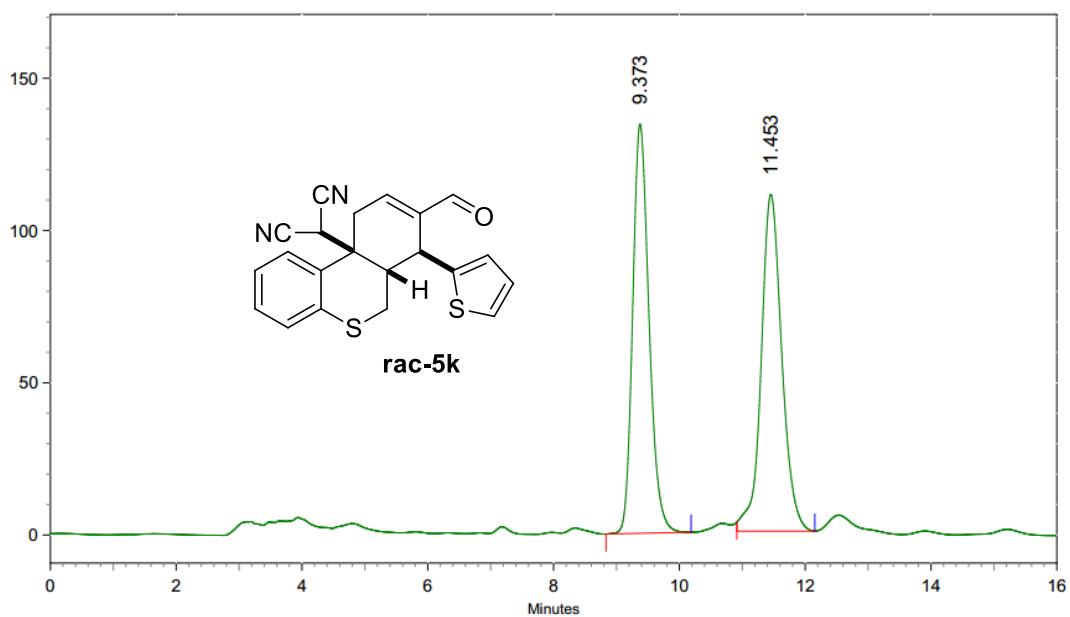

**AREA PERCENT REPORT**

| Peak No. | Ret Time | Width | Height  | Area     | Area [%] |
|----------|----------|-------|---------|----------|----------|
| 1        | 9.373    | 1.353 | 2254551 | 40665370 | 49.0060  |
| 2        | 11.453   | 1.240 | 1855338 | 42315011 | 50.9940  |

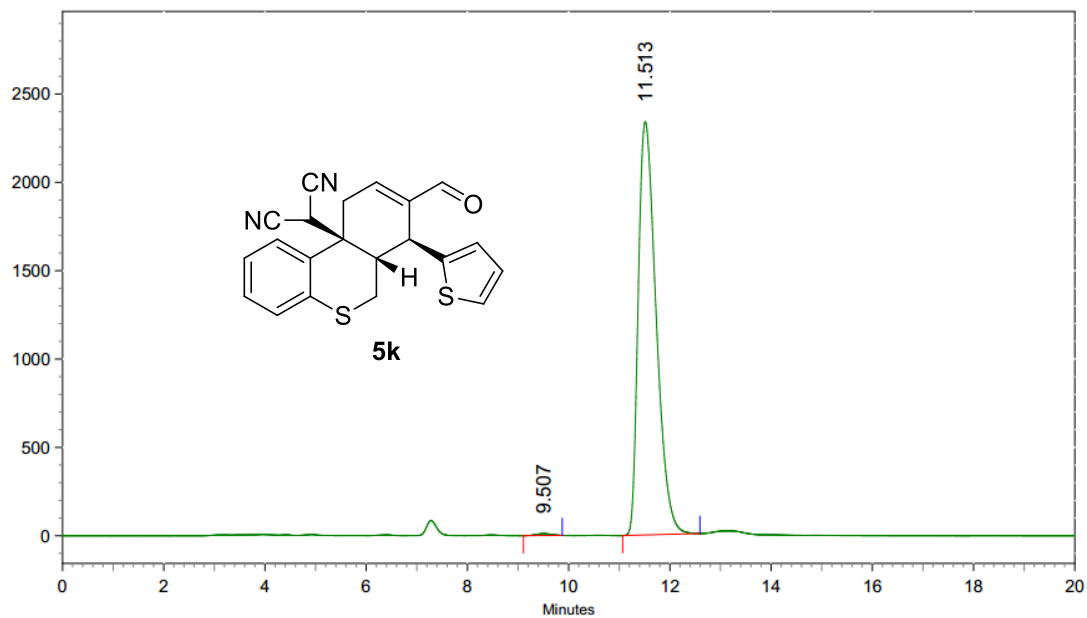

**AREA PERCENT REPORT**

| Peak No. | Ret Time | Width | Height   | Area      | Area [%] |
|----------|----------|-------|----------|-----------|----------|
| 1        | 9.507    | 0.767 | 180212   | 3686255   | 0.3822   |
| 2        | 11.513   | 1.527 | 39232253 | 960719689 | 99.6178  |

# Spectrum Plot Report

|                |                   |              |            |              |                                  |
|----------------|-------------------|--------------|------------|--------------|----------------------------------|
| Name           | CYC-20191124-21   | Rack Pos.    | Instrument | Instrument 1 | Operator                         |
| Inj. Vol. (ul) | 10                | Plate Pos.   | IRM Status | Success      |                                  |
| Data File      | CYC-20191124-21.d | Method (Acq) | TOF.m      | Comment      | Acq. Time (Local)                |
|                |                   |              |            |              | 12/5/2019 6:28:08 PM (UTC+08:00) |

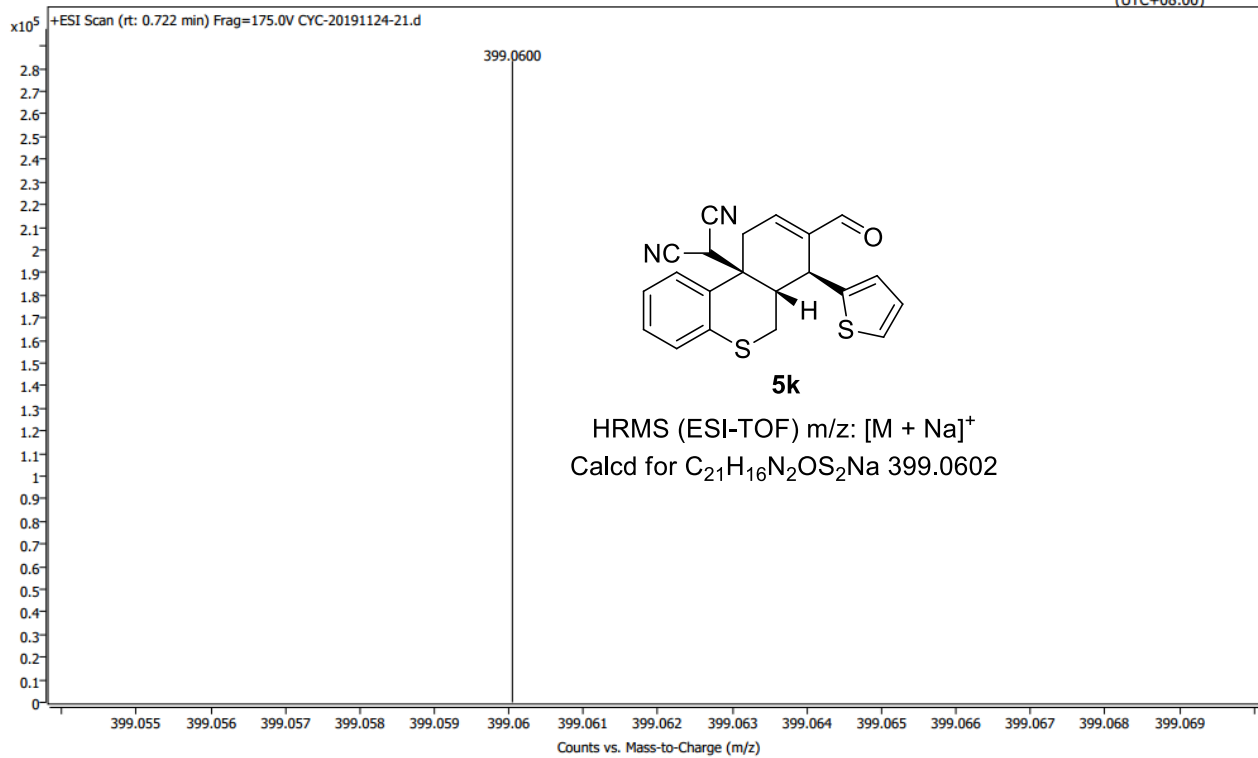

9.260  
 7.827  
 7.618  
 7.598  
 7.577  
 7.557  
 7.423  
 7.404  
 7.386  
 7.360  
 7.324  
 7.296  
 7.288  
 7.272  
 7.217  
 7.212  
 7.205  
 7.198  
 7.184  
 7.181  
 6.978  
 6.969  
 5.095  
 4.409  
 3.379  
 3.352  
 3.091  
 3.081  
 3.053  
 2.999  
 2.965  
 2.952  
 2.896  
 2.828  
 2.815  
 -0.000

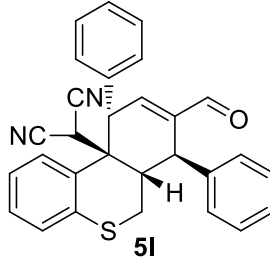

<sup>1</sup>H-NMR (400MHz, CDCl<sub>3</sub>)

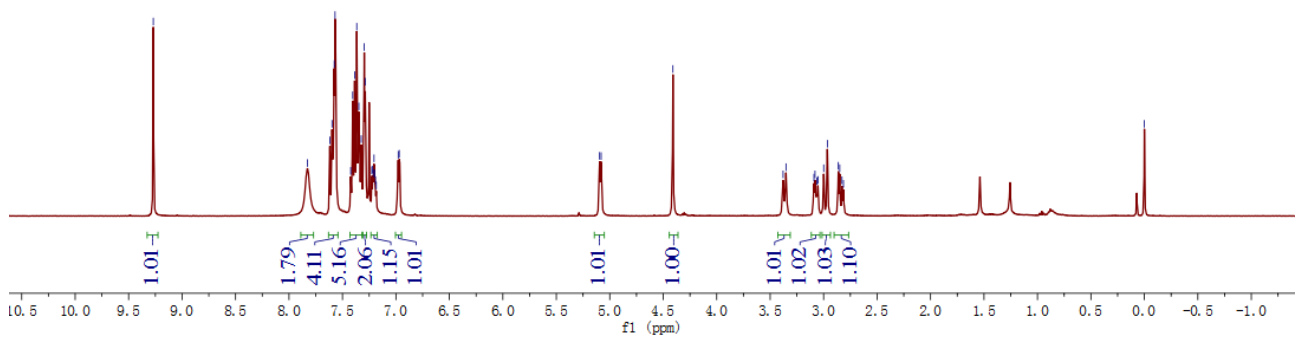

191.564  
 146.228  
 142.410  
 139.529  
 138.030  
 132.653  
 131.814  
 130.197  
 129.739  
 129.135  
 129.145  
 128.368  
 127.981  
 127.126  
 125.467  
 111.468  
 108.652  
 46.800  
 45.376  
 42.415  
 35.312  
 28.641  
 22.899

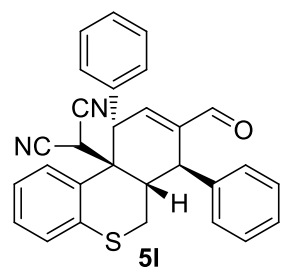

<sup>13</sup>C-NMR (100MHz, CDCl<sub>3</sub>)

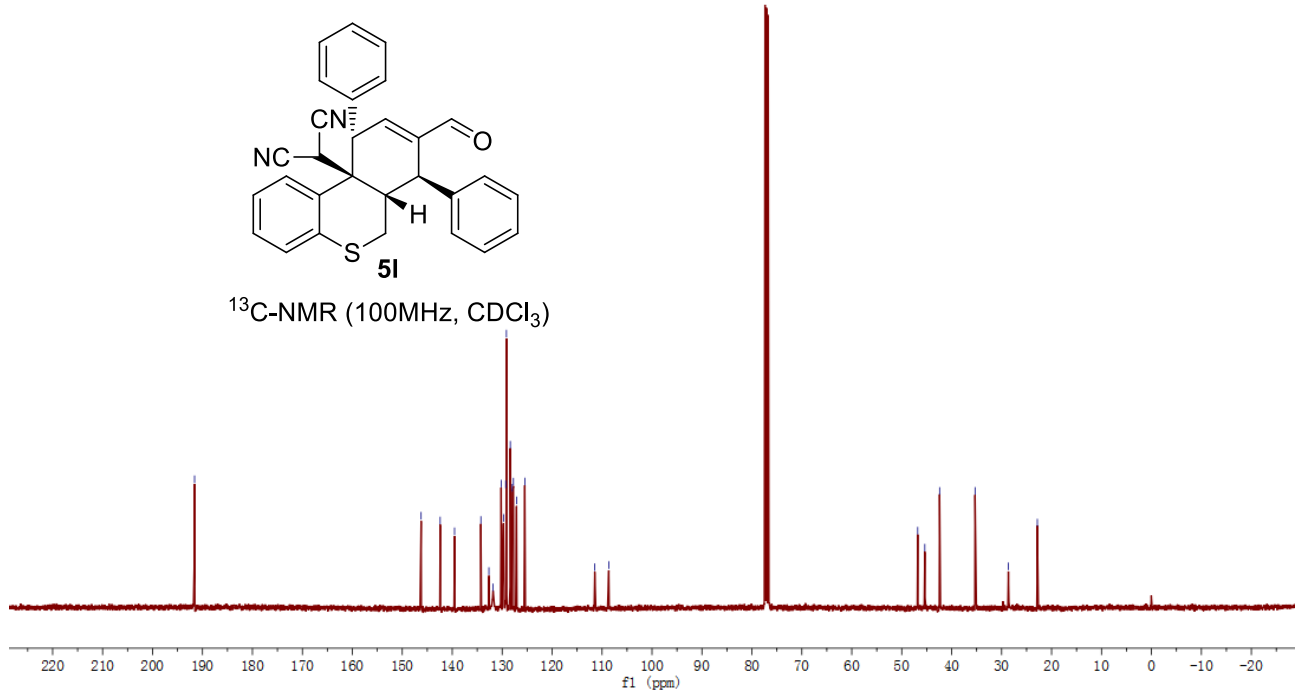

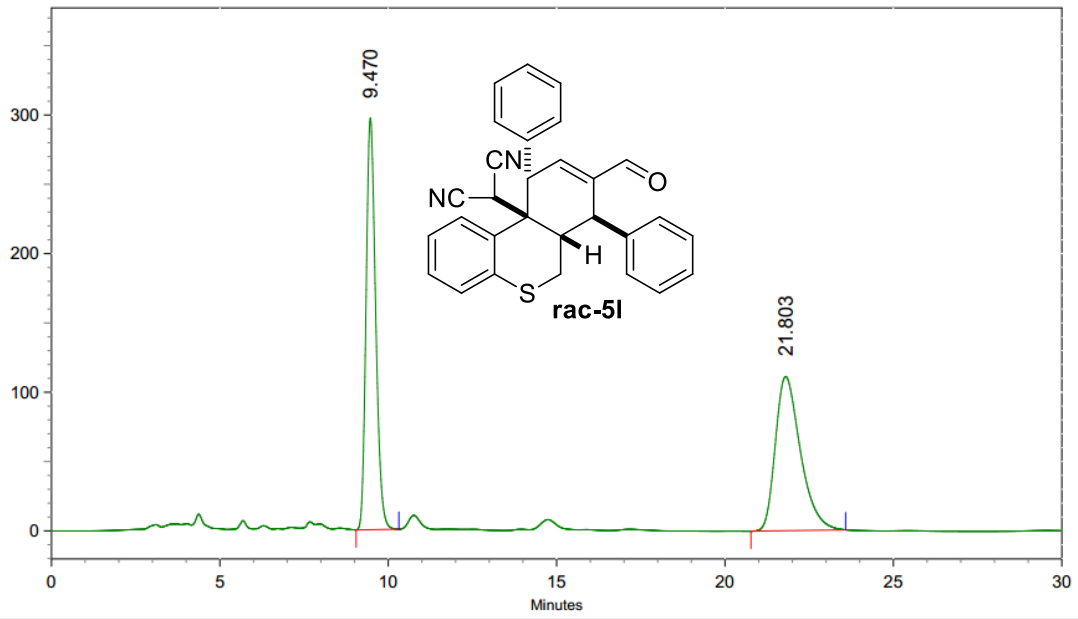

**AREA PERCENT REPORT**

| Peak No. | Ret Time | Width | Height  | Area     | Area [%] |
|----------|----------|-------|---------|----------|----------|
| 1        | 9.470    | 1.270 | 4981769 | 98357123 | 50.5030  |
| 2        | 21.803   | 2.810 | 1866011 | 96398073 | 49.4970  |

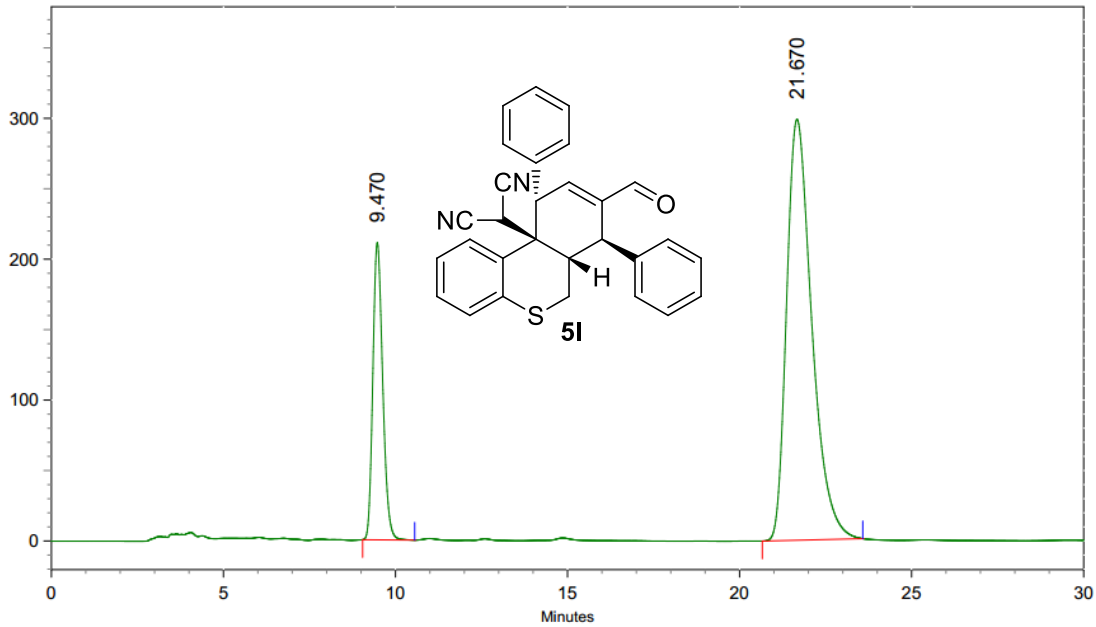

**AREA PERCENT REPORT**

| Peak No. | Ret Time | Width | Height  | Area      | Area [%] |
|----------|----------|-------|---------|-----------|----------|
| 1        | 9.470    | 1.513 | 3538913 | 70390617  | 21.6262  |
| 2        | 21.670   | 2.920 | 5012651 | 255096578 | 78.3738  |

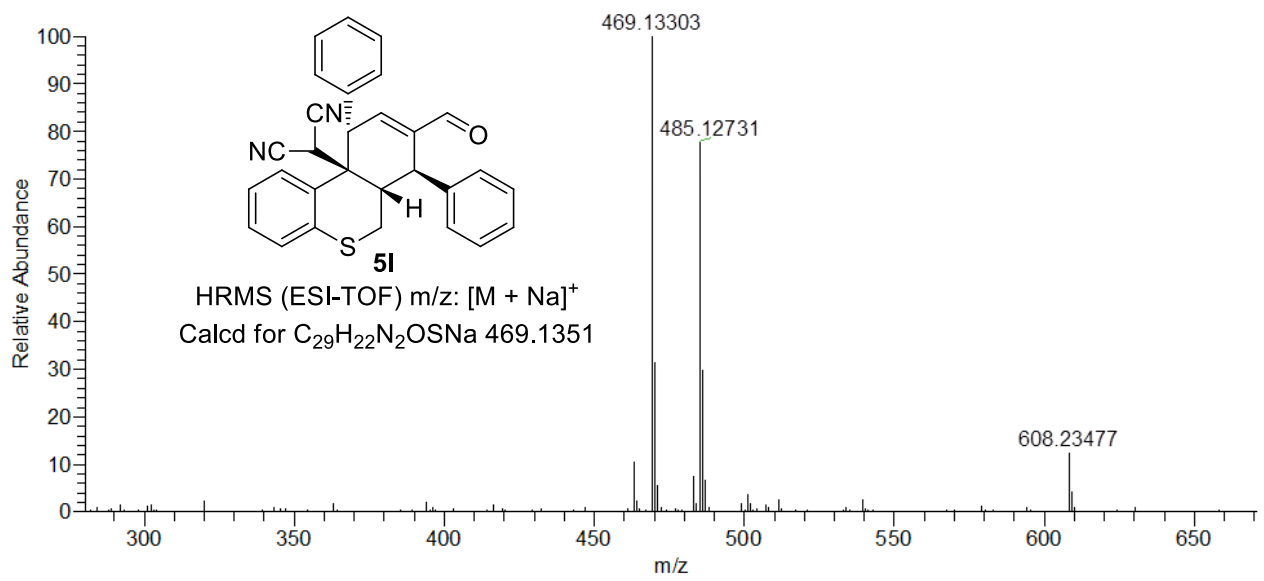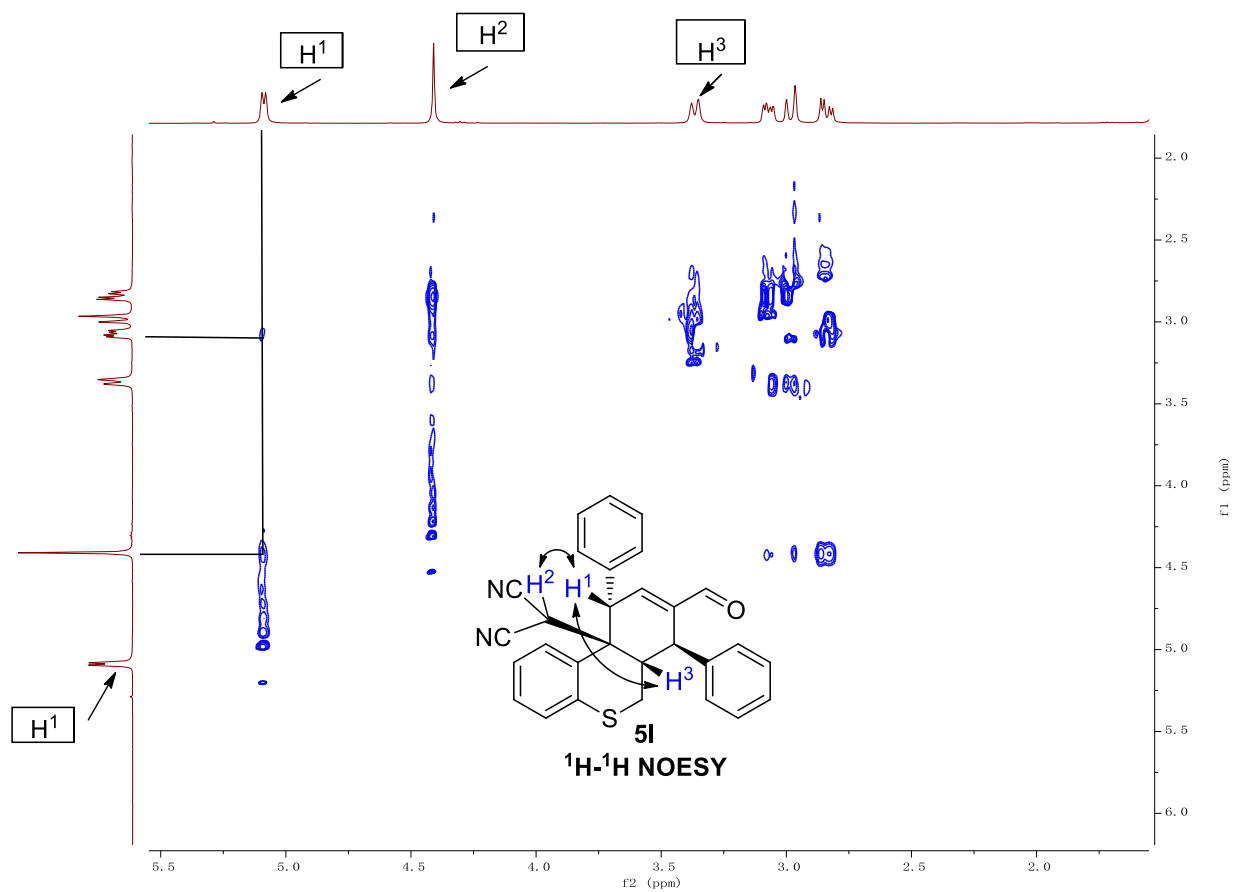

-9.211

7.360  
7.355  
7.335  
7.330  
7.308  
7.298  
7.296  
7.274  
7.228  
7.216  
6.964  
6.950  
6.937  
6.914  
6.904

4.322  
4.170  
4.156  
3.627  
3.616  
3.604  
3.594  
3.159  
3.127

2.494  
2.478

-0.019

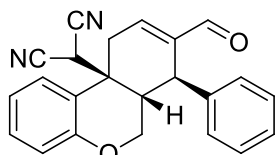

5m

<sup>1</sup>H-NMR (400MHz, CDCl<sub>3</sub>)

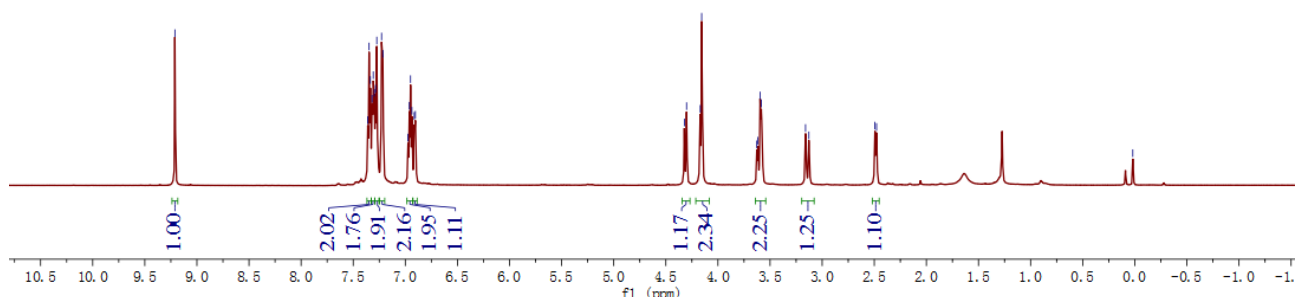

101.387  
153.264  
143.017  
142.796  
140.610  
131.020  
128.966  
127.973  
126.214  
121.417  
119.112  
110.644  
110.396  
61.969  
41.403  
40.635  
40.208  
30.475

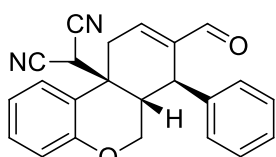

5m

<sup>13</sup>C-NMR (100MHz, CDCl<sub>3</sub>)

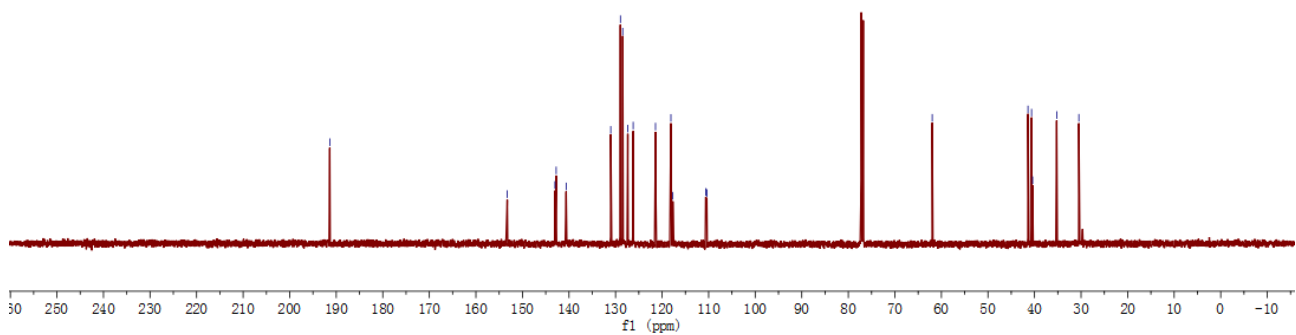

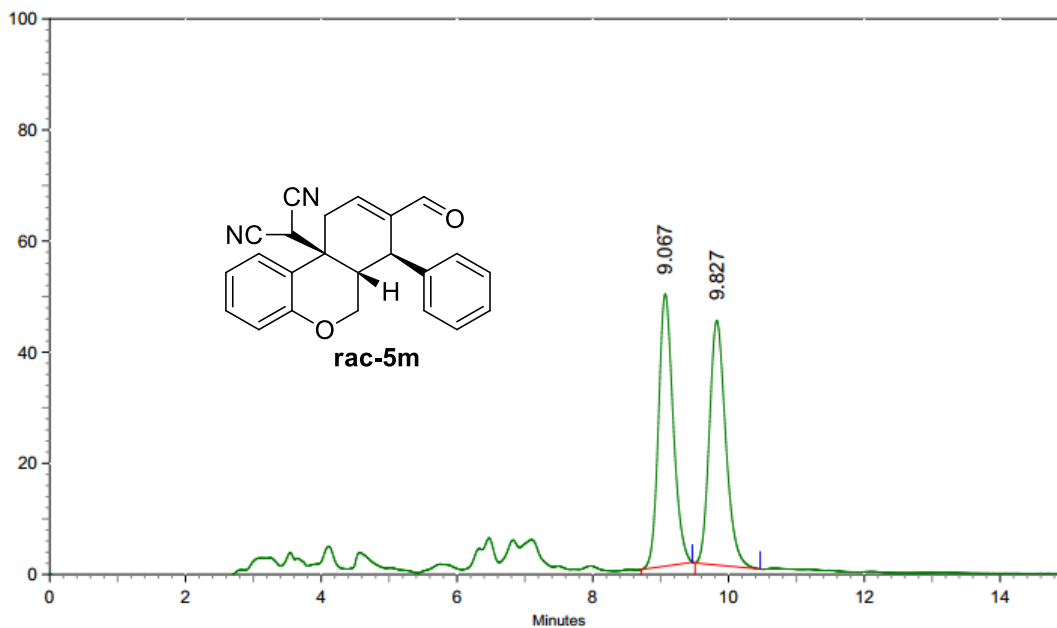

### AREA PERCENT REPORT

| Peak No. | Ret Time | Width | Height | Area     | Area [%] |
|----------|----------|-------|--------|----------|----------|
| 1        | 9.067    | 0.753 | 821111 | 12351248 | 50.0465  |
| 2        | 9.827    | 0.960 | 737535 | 12328273 | 49.9535  |

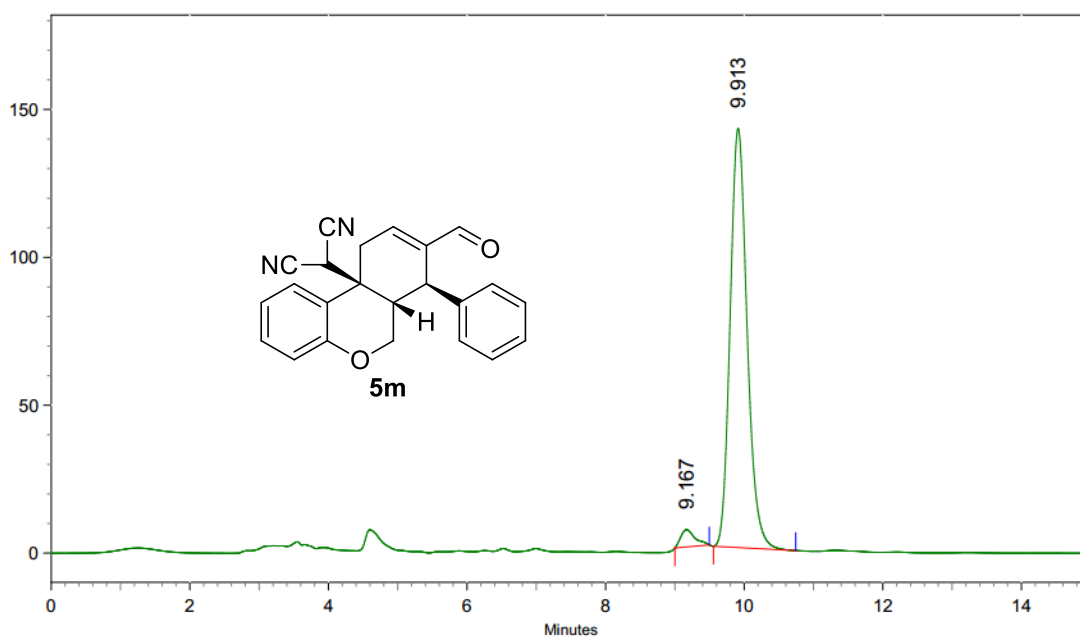

### AREA PERCENT REPORT

| Peak No. | Ret Time | Width | Height  | Area     | Area [%] |
|----------|----------|-------|---------|----------|----------|
| 1        | 9.167    | 0.497 | 97672   | 1389840  | 3.3247   |
| 2        | 9.913    | 1.187 | 2377380 | 40413871 | 96.6753  |

Spectrum from 20201003.wiff2 (sample 10) - GY-E02, +TOF MS (300 - 450) from 0.132 min, noise filtered (noise multiplier = 1.5), Gaussian smoothed (0.5 points)

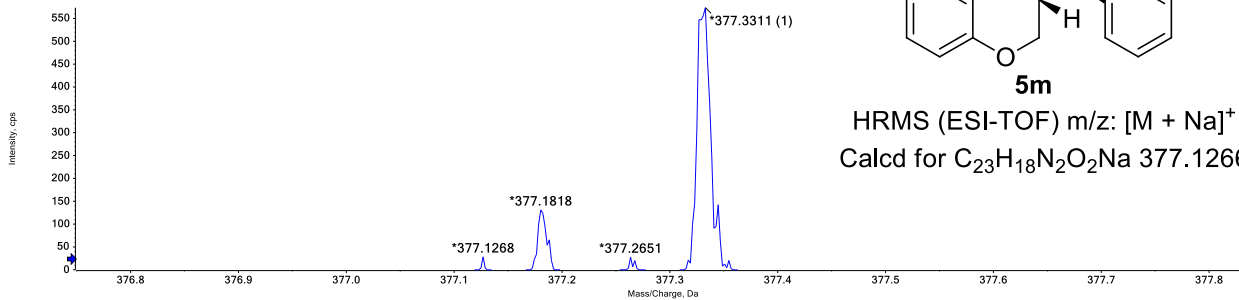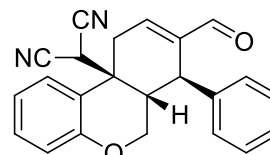

**5m**

HRMS (ESI-TOF) m/z: [M + Na]<sup>+</sup>  
Calcd for C<sub>23</sub>H<sub>18</sub>N<sub>2</sub>O<sub>2</sub>Na 377.1266



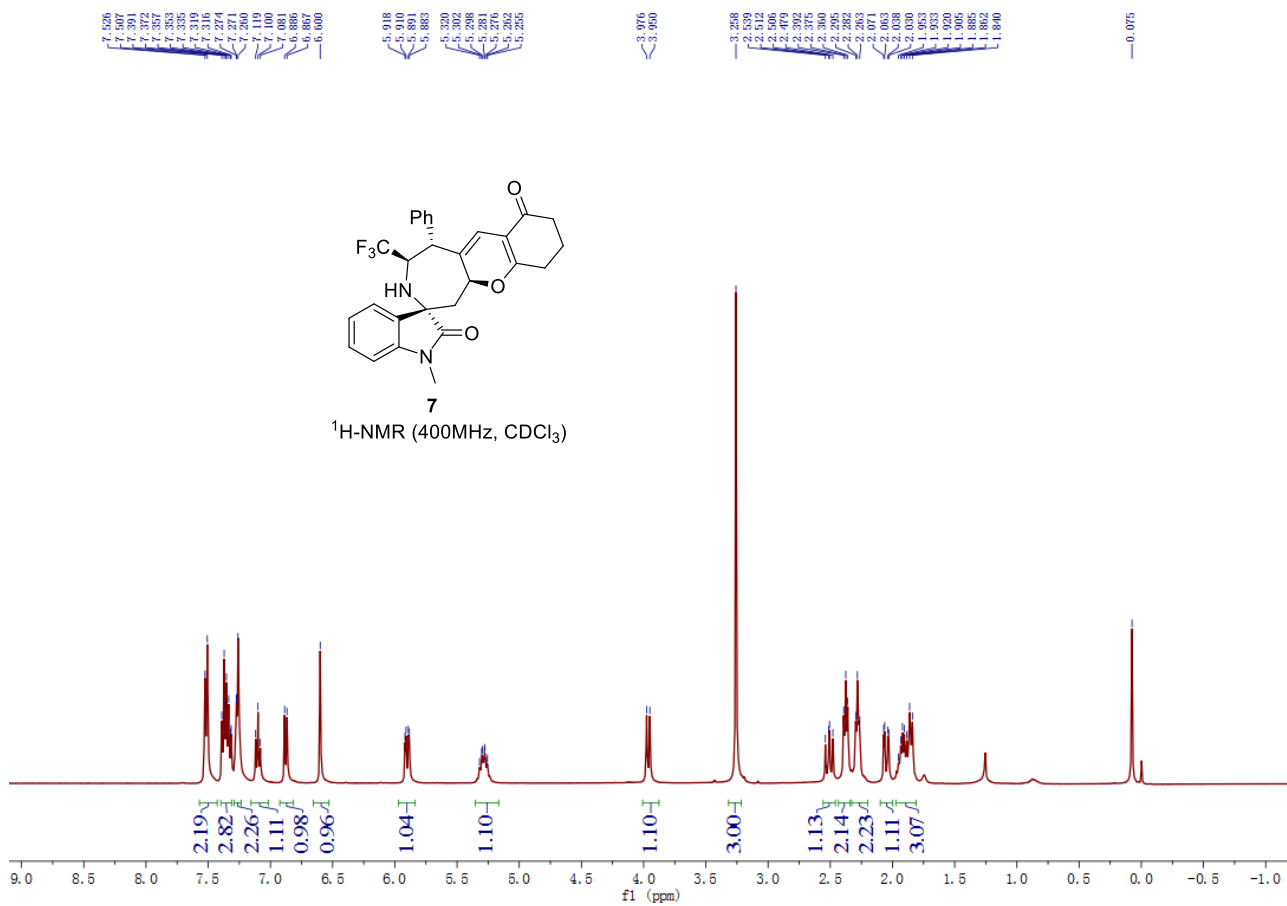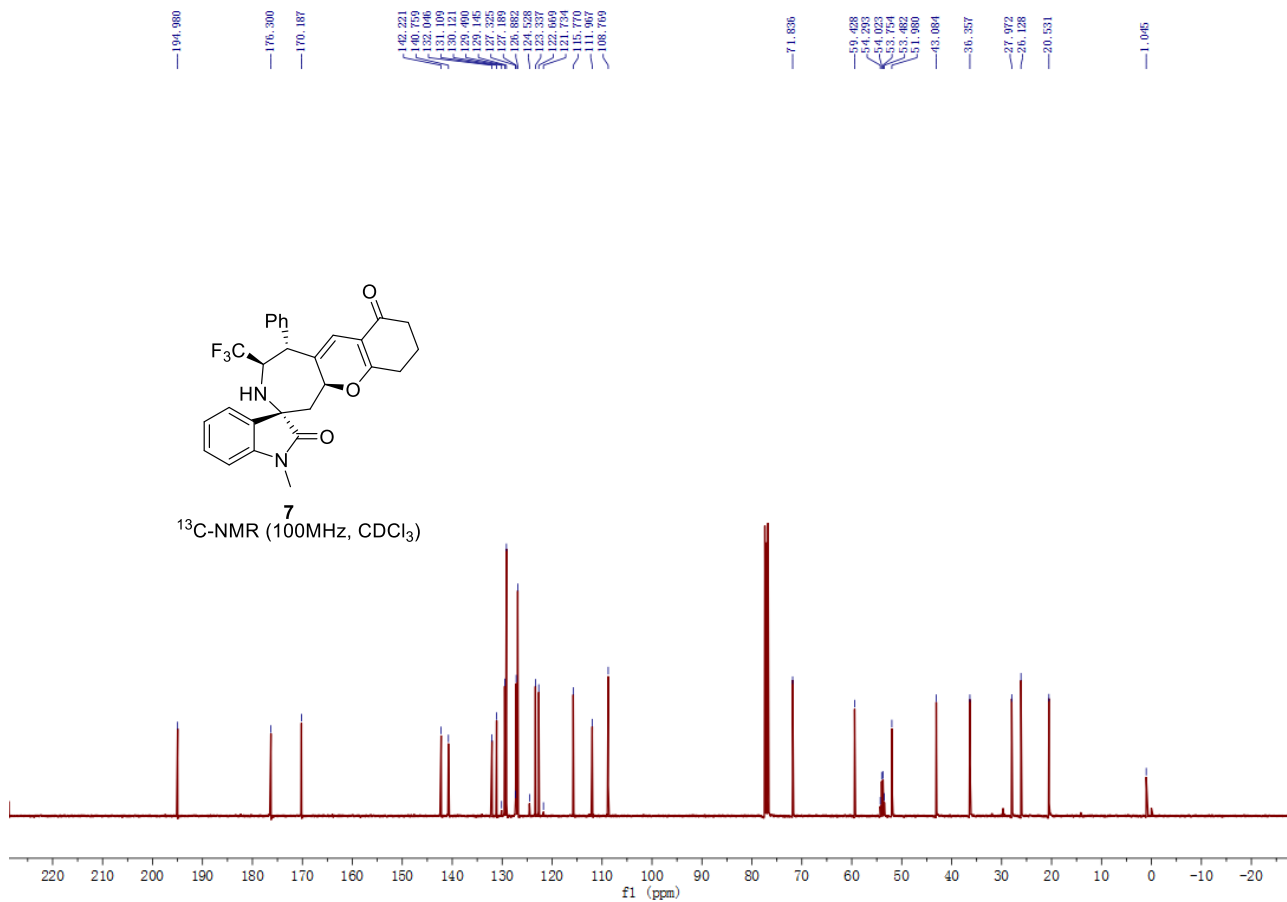

-71.283

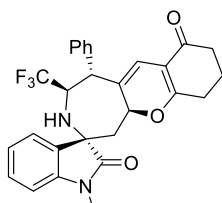

7

$^{19}\text{F}$ -NMR (376MHz,  $\text{CDCl}_3$ )

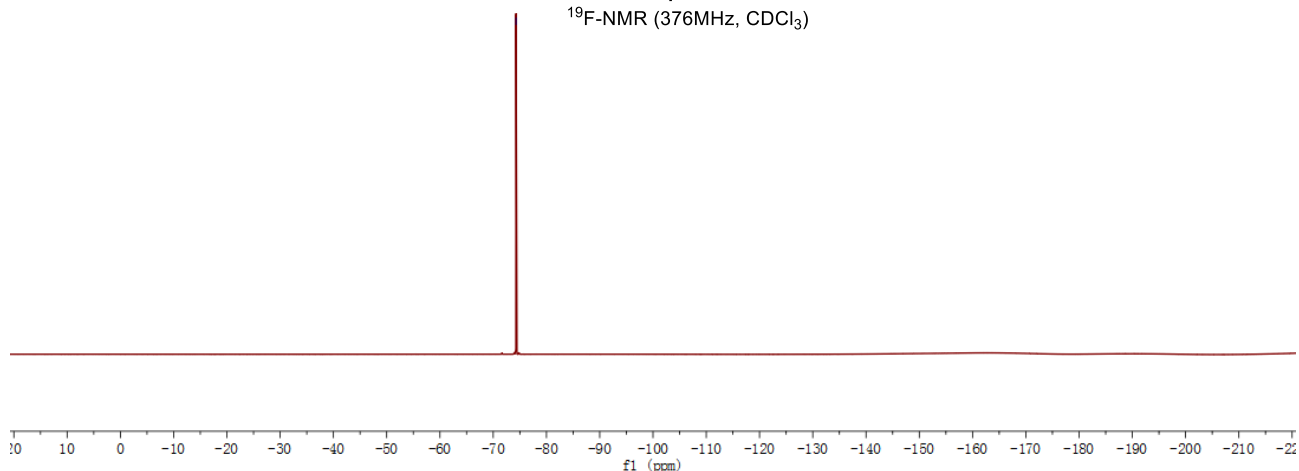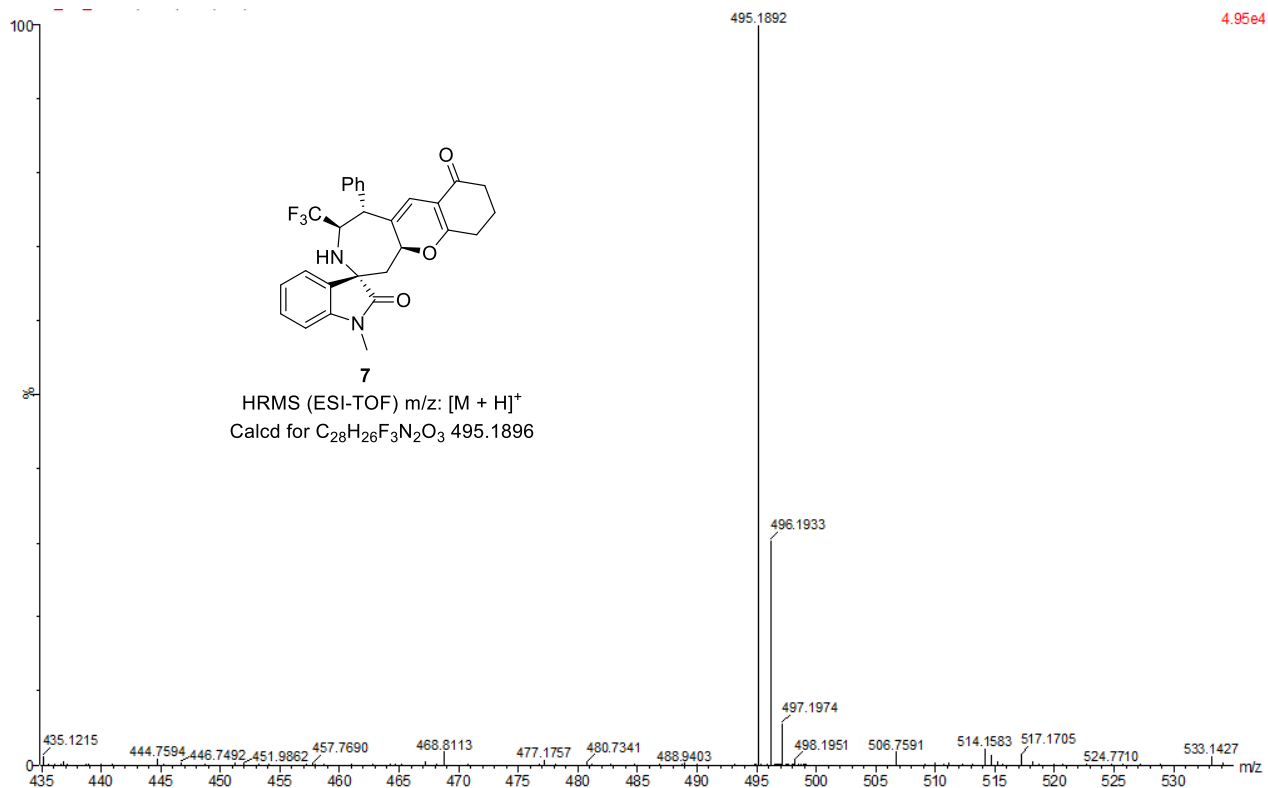

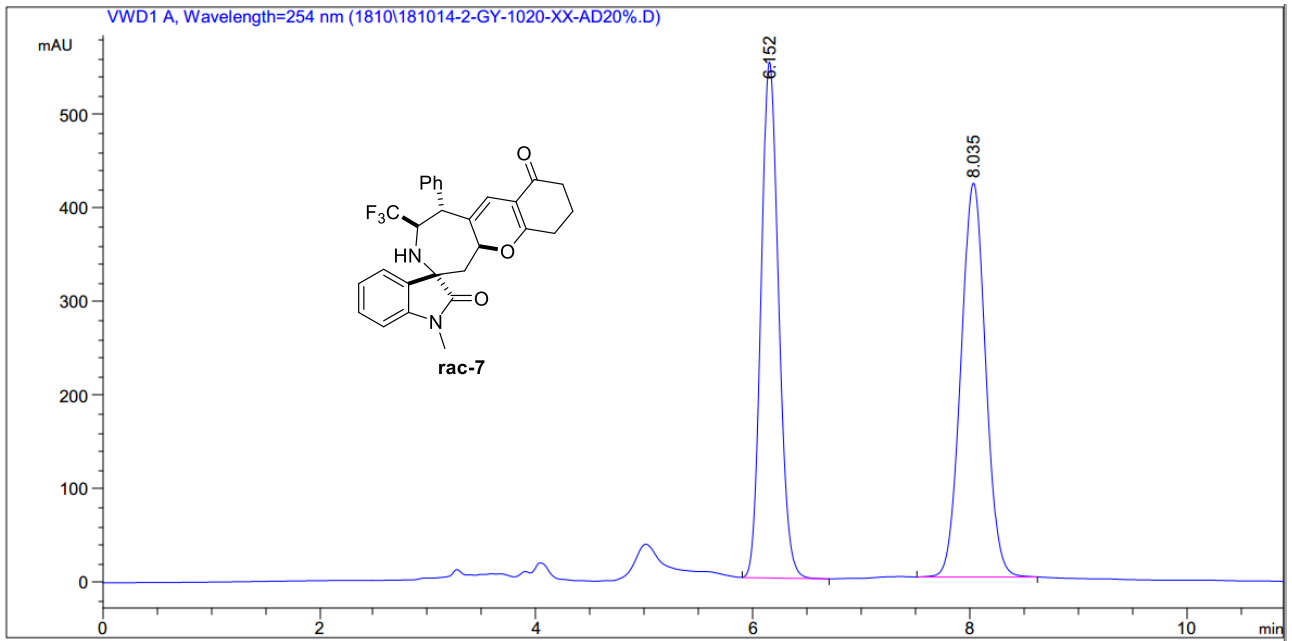

| Peak # | RetTime [min] | Type | Width [min] | Area mAU *s | Height [mAU] | Area %  |
|--------|---------------|------|-------------|-------------|--------------|---------|
| 1      | 6.152         | BV   | 0.1754      | 6227.13428  | 551.47760    | 48.3744 |
| 2      | 8.035         | BBA  | 0.2467      | 6645.65039  | 421.08829    | 51.6256 |

Totals : 1.28728e4 972.56589

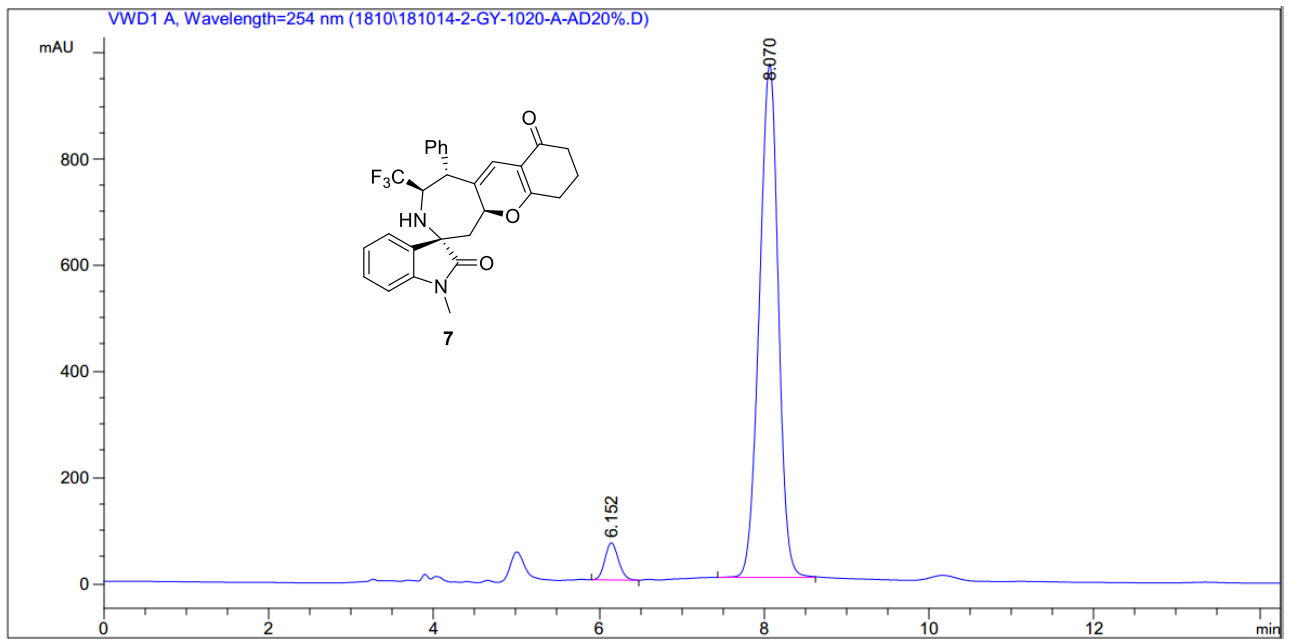

| Peak # | RetTime [min] | Type | Width [min] | Area mAU *s | Height [mAU] | Area %  |
|--------|---------------|------|-------------|-------------|--------------|---------|
| 1      | 6.152         | BV   | 0.1768      | 796.09375   | 69.79441     | 4.9089  |
| 2      | 8.070         | BBA  | 0.2469      | 1.54212e4   | 968.48712    | 95.0911 |

Totals : 1.62173e4 1038.28153

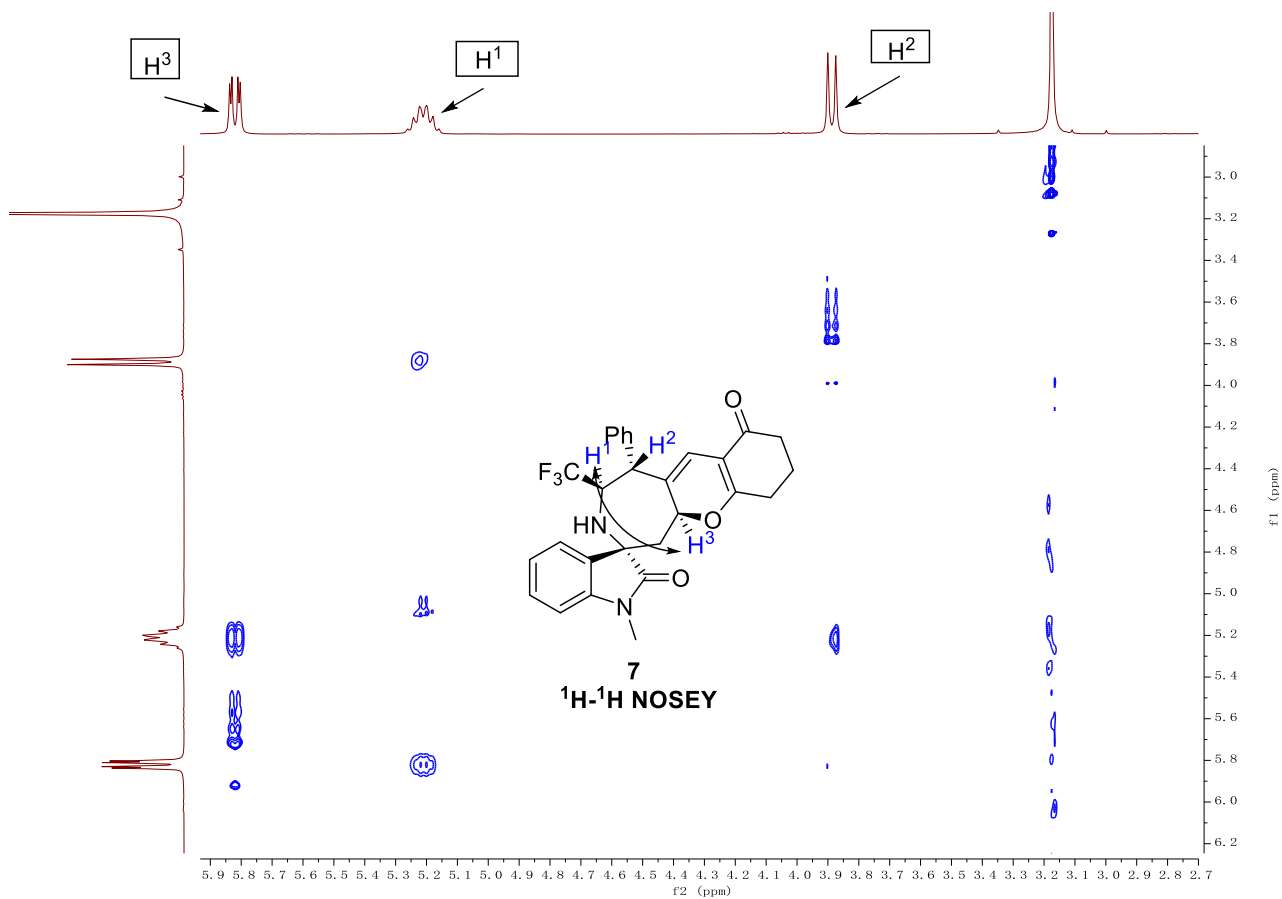

Supplement: d0ob02068k1.pdf [file d0ob02068k1.pdf]
